# Supplementary material for: Quantitative H2S-mediated protein sulfhydration reveals metabolic reprogramming during the integrated stress response
Source: eLife. 2015 Nov 23;4:e10067. doi: 10.7554/eLife.10067 (PMC4733038; doi:10.7554/eLife.10067)
Supplement: Figure 2—source data 1. — DOI: http://dx.doi.org/10.7554/eLife.10067.010 [file elife-10067-fig2-data1.xlsx]

## Sheet: sulfhydrome from Tg18 MIN6
prot_hit_num	prot_acc
1	Gene id	Protein id	Cysteine-containing peptide sequence	pep_exp_mr	pep_calc_mr	pep_delta	Peptide_score
1	CLH1_MOUSE	Clathrin heavy chain 1 OS=Mus musculus GN=Cltc PE=1 SV=3	QSVELCK	862.42	862.422	-0.0014	43.77
1	CLH1_MOUSE	Clathrin heavy chain 1 OS=Mus musculus GN=Cltc PE=1 SV=3	YESLELCR	1068.49	1068.49	-0.0028	34.07
1	CLH1_MOUSE	Clathrin heavy chain 1 OS=Mus musculus GN=Cltc PE=1 SV=3	AHIAQLCEK	1068.54	1068.54	-0.0026	33.81
1	CLH1_MOUSE	Clathrin heavy chain 1 OS=Mus musculus GN=Cltc PE=1 SV=3	AHIAQLCEK	1068.54	1068.54	-0.0016	45.35
1	CLH1_MOUSE	Clathrin heavy chain 1 OS=Mus musculus GN=Cltc PE=1 SV=3	ESNCYDPER	1168.44	1168.45	-0.0017	34.8
1	CLH1_MOUSE	Clathrin heavy chain 1 OS=Mus musculus GN=Cltc PE=1 SV=3	ESNCYDPER	1168.44	1168.45	-0.0014	34.66
1	CLH1_MOUSE	Clathrin heavy chain 1 OS=Mus musculus GN=Cltc PE=1 SV=3	EVCFACVDGK	1183.5	1183.5	-0.0027	33.11
1	CLH1_MOUSE	Clathrin heavy chain 1 OS=Mus musculus GN=Cltc PE=1 SV=3	DPHLACVAYER	1329.61	1329.61	-0.0026	34.74
1	CLH1_MOUSE	Clathrin heavy chain 1 OS=Mus musculus GN=Cltc PE=1 SV=3	YIQAACKTGQIK	1379.72	1379.72	-0.0025	54.01
1	CLH1_MOUSE	Clathrin heavy chain 1 OS=Mus musculus GN=Cltc PE=1 SV=3	YIQAACKTGQIK	1379.72	1379.72	-0.0024	30.15
1	CLH1_MOUSE	Clathrin heavy chain 1 OS=Mus musculus GN=Cltc PE=1 SV=3	YIQAACKTGQIK	1379.72	1379.72	-0.0023	54.98
1	CLH1_MOUSE	Clathrin heavy chain 1 OS=Mus musculus GN=Cltc PE=1 SV=3	YIQAACKTGQIK	1379.72	1379.72	-0.0023	33.98
1	CLH1_MOUSE	Clathrin heavy chain 1 OS=Mus musculus GN=Cltc PE=1 SV=3	QNLQICVQVASK	1386.73	1386.73	-0.0015	50.17
1	CLH1_MOUSE	Clathrin heavy chain 1 OS=Mus musculus GN=Cltc PE=1 SV=3	CNEPAVWSQLAK	1401.67	1401.67	-0.0028	64.47
1	CLH1_MOUSE	Clathrin heavy chain 1 OS=Mus musculus GN=Cltc PE=1 SV=3	CNEPAVWSQLAK	1401.67	1401.67	-0.0026	41.21
1	CLH1_MOUSE	Clathrin heavy chain 1 OS=Mus musculus GN=Cltc PE=1 SV=3	RDPHLACVAYER	1485.71	1485.71	-0.0031	25.56
1	CLH1_MOUSE	Clathrin heavy chain 1 OS=Mus musculus GN=Cltc PE=1 SV=3	VIQCFAETGQVQK	1506.75	1506.75	-0.0025	75.66
1	CLH1_MOUSE	Clathrin heavy chain 1 OS=Mus musculus GN=Cltc PE=1 SV=3	VIQCFAETGQVQK	1506.75	1506.75	-0.0024	75.45
1	CLH1_MOUSE	Clathrin heavy chain 1 OS=Mus musculus GN=Cltc PE=1 SV=3	HSSLAGCQIINYR	1517.74	1517.74	-0.0037	32.92
1	CLH1_MOUSE	Clathrin heavy chain 1 OS=Mus musculus GN=Cltc PE=1 SV=3	HSSLAGCQIINYR	1517.74	1517.74	-0.0032	78.38
1	CLH1_MOUSE	Clathrin heavy chain 1 OS=Mus musculus GN=Cltc PE=1 SV=3	HSSLAGCQIINYR	1517.74	1517.74	-0.0026	64.5
1	CLH1_MOUSE	Clathrin heavy chain 1 OS=Mus musculus GN=Cltc PE=1 SV=3	LTDQLPLIIVCDR	1554.84	1554.84	-0.0019	41.5
1	CLH1_MOUSE	Clathrin heavy chain 1 OS=Mus musculus GN=Cltc PE=1 SV=3	LTDQLPLIIVCDR	1554.84	1554.84	-0.0018	45.45
1	CLH1_MOUSE	Clathrin heavy chain 1 OS=Mus musculus GN=Cltc PE=1 SV=3	TWKEVCFACVDGK	1598.72	1598.72	-0.0028	33.5
1	CLH1_MOUSE	Clathrin heavy chain 1 OS=Mus musculus GN=Cltc PE=1 SV=3	TWKEVCFACVDGK	1598.72	1598.72	-0.0027	34.56
1	CLH1_MOUSE	Clathrin heavy chain 1 OS=Mus musculus GN=Cltc PE=1 SV=3	TWKEVCFACVDGK	1598.72	1598.72	-0.0021	26.93
1	CLH1_MOUSE	Clathrin heavy chain 1 OS=Mus musculus GN=Cltc PE=1 SV=3	AHIAQLCEKAGLLQR	1706.92	1706.92	-0.0043	51.13
1	CLH1_MOUSE	Clathrin heavy chain 1 OS=Mus musculus GN=Cltc PE=1 SV=3	AHIAQLCEKAGLLQR	1706.92	1706.92	-0.0041	83.88
1	CLH1_MOUSE	Clathrin heavy chain 1 OS=Mus musculus GN=Cltc PE=1 SV=3	AHIAQLCEKAGLLQR	1706.92	1706.92	-0.0034	56.13
1	CLH1_MOUSE	Clathrin heavy chain 1 OS=Mus musculus GN=Cltc PE=1 SV=3	AHIAQLCEKAGLLQR	1706.92	1706.92	-0.0032	86.25
1	CLH1_MOUSE	Clathrin heavy chain 1 OS=Mus musculus GN=Cltc PE=1 SV=3	AHIAQLCEKAGLLQR	1706.92	1706.92	-0.003	22.71
1	CLH1_MOUSE	Clathrin heavy chain 1 OS=Mus musculus GN=Cltc PE=1 SV=3	EDKLECSEELGDLVK	1762.83	1762.83	-0.0034	52.36
1	CLH1_MOUSE	Clathrin heavy chain 1 OS=Mus musculus GN=Cltc PE=1 SV=3	EDKLECSEELGDLVK	1762.83	1762.83	-0.003	30.6
1	CLH1_MOUSE	Clathrin heavy chain 1 OS=Mus musculus GN=Cltc PE=1 SV=3	EDKLECSEELGDLVK	1762.83	1762.83	-0.0026	49.2
1	CLH1_MOUSE	Clathrin heavy chain 1 OS=Mus musculus GN=Cltc PE=1 SV=3	EDKLECSEELGDLVK	1762.83	1762.83	-0.0025	26.76
1	CLH1_MOUSE	Clathrin heavy chain 1 OS=Mus musculus GN=Cltc PE=1 SV=3	IHEGCEEPATHNALAK	1775.82	1775.83	-0.0028	38.65
1	CLH1_MOUSE	Clathrin heavy chain 1 OS=Mus musculus GN=Cltc PE=1 SV=3	IHEGCEEPATHNALAK	1775.82	1775.83	-0.0022	29.57
1	CLH1_MOUSE	Clathrin heavy chain 1 OS=Mus musculus GN=Cltc PE=1 SV=3	IHEGCEEPATHNALAK	1775.82	1775.83	-0.0022	64.84
1	CLH1_MOUSE	Clathrin heavy chain 1 OS=Mus musculus GN=Cltc PE=1 SV=3	IHEGCEEPATHNALAK	1775.82	1775.83	-0.0021	73.34
1	CLH1_MOUSE	Clathrin heavy chain 1 OS=Mus musculus GN=Cltc PE=1 SV=3	YESLELCRPVLQQGR	1846.93	1846.94	-0.0035	61.07
1	CLH1_MOUSE	Clathrin heavy chain 1 OS=Mus musculus GN=Cltc PE=1 SV=3	YESLELCRPVLQQGR	1846.93	1846.94	-0.0028	23.15
1	CLH1_MOUSE	Clathrin heavy chain 1 OS=Mus musculus GN=Cltc PE=1 SV=3	YESLELCRPVLQQGR	1846.93	1846.94	-0.0026	61.04
1	CLH1_MOUSE	Clathrin heavy chain 1 OS=Mus musculus GN=Cltc PE=1 SV=3	LPVVIGGLLDVDCSEDVIK	2040.08	2040.08	-0.0031	94.85
1	CLH1_MOUSE	Clathrin heavy chain 1 OS=Mus musculus GN=Cltc PE=1 SV=3	LPVVIGGLLDVDCSEDVIK	2040.08	2040.08	-0.0031	94.76
1	CLH1_MOUSE	Clathrin heavy chain 1 OS=Mus musculus GN=Cltc PE=1 SV=3	LPVVIGGLLDVDCSEDVIK	2040.08	2040.08	-0.0024	43.37
1	CLH1_MOUSE	Clathrin heavy chain 1 OS=Mus musculus GN=Cltc PE=1 SV=3	LPVVIGGLLDVDCSEDVIK	2040.08	2040.08	-0.0021	66.63
1	CLH1_MOUSE	Clathrin heavy chain 1 OS=Mus musculus GN=Cltc PE=1 SV=3	LPVVIGGLLDVDCSEDVIK	2040.08	2040.08	0.0025	40.08
1	CLH1_MOUSE	Clathrin heavy chain 1 OS=Mus musculus GN=Cltc PE=1 SV=3	ANVPNKVIQCFAETGQVQK	2130.09	2130.09	-0.0019	46.97
1	CLH1_MOUSE	Clathrin heavy chain 1 OS=Mus musculus GN=Cltc PE=1 SV=3	GQCDLELINVCNENSLFK	2151.99	2151.99	-0.0038	32.87
1	CLH1_MOUSE	Clathrin heavy chain 1 OS=Mus musculus GN=Cltc PE=1 SV=3	GQCDLELINVCNENSLFK	2151.99	2151.99	-0.0038	69.92
1	CLH1_MOUSE	Clathrin heavy chain 1 OS=Mus musculus GN=Cltc PE=1 SV=3	GQCDLELINVCNENSLFK	2151.99	2151.99	-0.0011	74.57
1	CLH1_MOUSE	Clathrin heavy chain 1 OS=Mus musculus GN=Cltc PE=1 SV=3	AYEFAERCNEPAVWSQLAK	2268.06	2268.06	-0.0054	57.19
1	CLH1_MOUSE	Clathrin heavy chain 1 OS=Mus musculus GN=Cltc PE=1 SV=3	AYEFAERCNEPAVWSQLAK	2268.06	2268.06	-0.0036	46.11
1	CLH1_MOUSE	Clathrin heavy chain 1 OS=Mus musculus GN=Cltc PE=1 SV=3	AYEFAERCNEPAVWSQLAK	2268.06	2268.06	-0.002	46.64
1	CLH1_MOUSE	Clathrin heavy chain 1 OS=Mus musculus GN=Cltc PE=1 SV=3	AYEFAERCNEPAVWSQLAK	2268.06	2268.06	-0.0016	51.7
1	CLH1_MOUSE	Clathrin heavy chain 1 OS=Mus musculus GN=Cltc PE=1 SV=3	LPVVIGGLLDVDCSEDVIKNLILVVR	2847.61	2847.61	-0.0034	53.45
1	CLH1_MOUSE	Clathrin heavy chain 1 OS=Mus musculus GN=Cltc PE=1 SV=3	LPVVIGGLLDVDCSEDVIKNLILVVR	2847.61	2847.61	-0.0025	76.32
2	EF2_MOUSE	Clathrin heavy chain 1 OS=Mus musculus GN=Cltc PE=1 SV=3	AVVHTHLLNPEWLVNYFGSLSVEDSLECLR	3496.74	3496.74	-0.0023	26.89
2	EF2_MOUSE	Elongation factor 2 OS=Mus musculus GN=Eef2 PE=1 SV=2	STLTDSLVCK	1122.56	1122.56	-0.0028	44.48
2	EF2_MOUSE	Elongation factor 2 OS=Mus musculus GN=Eef2 PE=1 SV=2	STLTDSLVCK	1122.56	1122.56	-0.0021	43.37
2	EF2_MOUSE	Elongation factor 2 OS=Mus musculus GN=Eef2 PE=1 SV=2	CLYASVLTAQPR	1377.71	1377.71	-0.0021	23.81
2	EF2_MOUSE	Elongation factor 2 OS=Mus musculus GN=Eef2 PE=1 SV=2	CLYASVLTAQPR	1377.71	1377.71	-0.0016	51.17
2	EF2_MOUSE	Elongation factor 2 OS=Mus musculus GN=Eef2 PE=1 SV=2	CLYASVLTAQPR	1377.71	1377.71	-0.0014	55.63
2	EF2_MOUSE	Elongation factor 2 OS=Mus musculus GN=Eef2 PE=1 SV=2	KDEQERCITIK	1418.72	1418.72	-0.0022	31.53
2	EF2_MOUSE	Elongation factor 2 OS=Mus musculus GN=Eef2 PE=1 SV=2	DLEEDHACIPIK	1438.67	1438.68	-0.0034	24.2
2	EF2_MOUSE	Elongation factor 2 OS=Mus musculus GN=Eef2 PE=1 SV=2	DLEEDHACIPIK	1438.67	1438.68	-0.0027	24.07
2	EF2_MOUSE	Elongation factor 2 OS=Mus musculus GN=Eef2 PE=1 SV=2	DLEEDHACIPIK	1438.67	1438.68	-0.0024	73.91
2	EF2_MOUSE	Elongation factor 2 OS=Mus musculus GN=Eef2 PE=1 SV=2	TFCQLILDPIFK	1493.79	1493.8	-0.0013	70.32
2	EF2_MOUSE	Elongation factor 2 OS=Mus musculus GN=Eef2 PE=1 SV=2	TFCQLILDPIFK	1493.79	1493.8	-0.0009	60.65
2	EF2_MOUSE	Elongation factor 2 OS=Mus musculus GN=Eef2 PE=1 SV=2	RCLYASVLTAQPR	1533.81	1533.81	-0.0031	34.58
2	EF2_MOUSE	Elongation factor 2 OS=Mus musculus GN=Eef2 PE=1 SV=2	RCLYASVLTAQPR	1533.81	1533.81	-0.0024	66.51
2	EF2_MOUSE	Elongation factor 2 OS=Mus musculus GN=Eef2 PE=1 SV=2	RCLYASVLTAQPR	1533.81	1533.81	-0.0017	68.49
2	EF2_MOUSE	Elongation factor 2 OS=Mus musculus GN=Eef2 PE=1 SV=2	DLEEDHACIPIKK	1566.77	1566.77	-0.0031	27.49
2	EF2_MOUSE	Elongation factor 2 OS=Mus musculus GN=Eef2 PE=1 SV=2	DLEEDHACIPIKK	1566.77	1566.77	-0.003	59.94
2	EF2_MOUSE	Elongation factor 2 OS=Mus musculus GN=Eef2 PE=1 SV=2	DLEEDHACIPIKK	1566.77	1566.77	-0.0029	23.5
2	EF2_MOUSE	Elongation factor 2 OS=Mus musculus GN=Eef2 PE=1 SV=2	DLEEDHACIPIKK	1566.77	1566.77	-0.0026	54.48
2	EF2_MOUSE	Elongation factor 2 OS=Mus musculus GN=Eef2 PE=1 SV=2	ETVSEESNVLCLSK	1593.75	1593.76	-0.0031	59.25
2	EF2_MOUSE	Elongation factor 2 OS=Mus musculus GN=Eef2 PE=1 SV=2	ETVSEESNVLCLSK	1593.75	1593.76	-0.0028	68.09
2	EF2_MOUSE	Elongation factor 2 OS=Mus musculus GN=Eef2 PE=1 SV=2	STLTDSLVCKAGIIASAR	1861.99	1861.99	-0.0035	96.1
2	EF2_MOUSE	Elongation factor 2 OS=Mus musculus GN=Eef2 PE=1 SV=2	STLTDSLVCKAGIIASAR	1861.99	1861.99	-0.003	60.81
2	EF2_MOUSE	Elongation factor 2 OS=Mus musculus GN=Eef2 PE=1 SV=2	STLTDSLVCKAGIIASAR	1861.99	1861.99	-0.0026	76.99
2	EF2_MOUSE	Elongation factor 2 OS=Mus musculus GN=Eef2 PE=1 SV=2	STLTDSLVCKAGIIASAR	1861.99	1861.99	-0.0023	50.24
2	EF2_MOUSE	Elongation factor 2 OS=Mus musculus GN=Eef2 PE=1 SV=2	IWCFGPDGTGPNILTDITK	2104.03	2104.03	-0.0032	80.94
2	EF2_MOUSE	Elongation factor 2 OS=Mus musculus GN=Eef2 PE=1 SV=2	IWCFGPDGTGPNILTDITK	2104.03	2104.03	-0.0028	59.09
2	EF2_MOUSE	Elongation factor 2 OS=Mus musculus GN=Eef2 PE=1 SV=2	IWCFGPDGTGPNILTDITK	2104.03	2104.03	-0.0028	61.72
2	EF2_MOUSE	Elongation factor 2 OS=Mus musculus GN=Eef2 PE=1 SV=2	IWCFGPDGTGPNILTDITK	2104.03	2104.03	-0.0025	73.21
2	EF2_MOUSE	Elongation factor 2 OS=Mus musculus GN=Eef2 PE=1 SV=2	KIWCFGPDGTGPNILTDITK	2232.12	2232.12	-0.0032	65.98
2	EF2_MOUSE	Elongation factor 2 OS=Mus musculus GN=Eef2 PE=1 SV=2	KIWCFGPDGTGPNILTDITK	2232.12	2232.12	-0.0025	55.67
2	EF2_MOUSE	Elongation factor 2 OS=Mus musculus GN=Eef2 PE=1 SV=2	KIWCFGPDGTGPNILTDITK	2232.12	2232.12	-0.0019	57.23
2	EF2_MOUSE	Elongation factor 2 OS=Mus musculus GN=Eef2 PE=1 SV=2	VTDGALVVVDCVSGVCVQTETVLR	2575.3	2575.3	-0.001	32.17
2	EF2_MOUSE	Elongation factor 2 OS=Mus musculus GN=Eef2 PE=1 SV=2	YVEPIEDVPCGNIVGLVGVDQFLVK	2758.42	2758.43	-0.0071	48.85
2	EF2_MOUSE	Elongation factor 2 OS=Mus musculus GN=Eef2 PE=1 SV=2	YVEPIEDVPCGNIVGLVGVDQFLVK	2758.42	2758.43	-0.0066	54.86
2	EF2_MOUSE	Elongation factor 2 OS=Mus musculus GN=Eef2 PE=1 SV=2	YVEPIEDVPCGNIVGLVGVDQFLVK	2758.42	2758.43	-0.0036	70.74
2	EF2_MOUSE	Elongation factor 2 OS=Mus musculus GN=Eef2 PE=1 SV=2	LMEPIYLVEIQCPEQVVGGIYGVLNR	2988.54	2988.55	-0.0033	74.35
2	EF2_MOUSE	Elongation factor 2 OS=Mus musculus GN=Eef2 PE=1 SV=2	LMEPIYLVEIQCPEQVVGGIYGVLNR	2988.54	2988.55	-0.0017	60.3
2	EF2_MOUSE	Elongation factor 2 OS=Mus musculus GN=Eef2 PE=1 SV=2	LMEPIYLVEIQCPEQVVGGIYGVLNR	3004.54	3004.54	-0.0042	59.33
2	EF2_MOUSE	Elongation factor 2 OS=Mus musculus GN=Eef2 PE=1 SV=2	LMEPIYLVEIQCPEQVVGGIYGVLNR	3004.54	3004.54	-0.0012	65.46
2	EF2_MOUSE	Elongation factor 2 OS=Mus musculus GN=Eef2 PE=1 SV=2	VTDGALVVVDCVSGVCVQTETVLRQAIAER	3243.65	3243.66	-0.005	52.54
2	EF2_MOUSE	Elongation factor 2 OS=Mus musculus GN=Eef2 PE=1 SV=2	VTDGALVVVDCVSGVCVQTETVLRQAIAER	3243.66	3243.66	-0.0023	30.02
2	EF2_MOUSE	Elongation factor 2 OS=Mus musculus GN=Eef2 PE=1 SV=2	SNTGGQAFPQCVFDHWQILPGDPFDNSSR	3276.46	3276.47	-0.0097	40.34
2	EF2_MOUSE	Elongation factor 2 OS=Mus musculus GN=Eef2 PE=1 SV=2	SNTGGQAFPQCVFDHWQILPGDPFDNSSR	3276.46	3276.47	-0.0086	37.47
2	EF2_MOUSE	Elongation factor 2 OS=Mus musculus GN=Eef2 PE=1 SV=2	SNTGGQAFPQCVFDHWQILPGDPFDNSSR	3276.46	3276.47	-0.0035	34.68
3	ACLY_MOUSE	Elongation factor 2 OS=Mus musculus GN=Eef2 PE=1 SV=2	SNTGGQAFPQCVFDHWQILPGDPFDNSSR	3276.47	3276.47	-0.0028	37.45
3	ACLY_MOUSE	ATP-citrate synthase OS=Mus musculus GN=Acly PE=1 SV=1	VDATADYICK	1154.53	1154.53	-0.0024	60.72
3	ACLY_MOUSE	ATP-citrate synthase OS=Mus musculus GN=Acly PE=1 SV=1	VDATADYICK	1154.53	1154.53	-0.0023	60.54
3	ACLY_MOUSE	ATP-citrate synthase OS=Mus musculus GN=Acly PE=1 SV=1	YICTTSAIQNR	1325.64	1325.64	-0.002	43.65
3	ACLY_MOUSE	ATP-citrate synthase OS=Mus musculus GN=Acly PE=1 SV=1	YICTTSAIQNR	1325.64	1325.64	-0.0016	46.64
3	ACLY_MOUSE	ATP-citrate synthase OS=Mus musculus GN=Acly PE=1 SV=1	VDATADYICKVK	1381.69	1381.69	-0.0031	21.9
3	ACLY_MOUSE	ATP-citrate synthase OS=Mus musculus GN=Acly PE=1 SV=1	VDATADYICKVK	1381.69	1381.69	-0.0026	21.8
3	ACLY_MOUSE	ATP-citrate synthase OS=Mus musculus GN=Acly PE=1 SV=1	KPASFMTSICDER	1540.7	1540.7	-0.0027	48.8
3	ACLY_MOUSE	ATP-citrate synthase OS=Mus musculus GN=Acly PE=1 SV=1	KPASFMTSICDER	1540.7	1540.7	-0.0011	33.53
3	ACLY_MOUSE	ATP-citrate synthase OS=Mus musculus GN=Acly PE=1 SV=1	AVQGMLDFDYVCSR	1659.74	1659.74	-0.0026	71.33
3	ACLY_MOUSE	ATP-citrate synthase OS=Mus musculus GN=Acly PE=1 SV=1	AVQGMLDFDYVCSR	1659.74	1659.74	-0.0017	62.01
3	ACLY_MOUSE	ATP-citrate synthase OS=Mus musculus GN=Acly PE=1 SV=1	GVTIIGPATVGGIKPGCFK	1871.03	1871.03	-0.0044	84.12
3	ACLY_MOUSE	ATP-citrate synthase OS=Mus musculus GN=Acly PE=1 SV=1	GVTIIGPATVGGIKPGCFK	1871.03	1871.03	-0.0033	23.27
3	ACLY_MOUSE	ATP-citrate synthase OS=Mus musculus GN=Acly PE=1 SV=1	GVTIIGPATVGGIKPGCFK	1871.03	1871.03	-0.0031	52.11
3	ACLY_MOUSE	ATP-citrate synthase OS=Mus musculus GN=Acly PE=1 SV=1	GVTIIGPATVGGIKPGCFK	1871.03	1871.03	-0.0026	21.95
3	ACLY_MOUSE	ATP-citrate synthase OS=Mus musculus GN=Acly PE=1 SV=1	ELLYKYICTTSAIQNR	1972	1972.01	-0.004	88.23
3	ACLY_MOUSE	ATP-citrate synthase OS=Mus musculus GN=Acly PE=1 SV=1	ELLYKYICTTSAIQNR	1972	1972.01	-0.0039	34.26
3	ACLY_MOUSE	ATP-citrate synthase OS=Mus musculus GN=Acly PE=1 SV=1	ELLYKYICTTSAIQNR	1972.01	1972.01	-0.0028	37.19
3	ACLY_MOUSE	ATP-citrate synthase OS=Mus musculus GN=Acly PE=1 SV=1	VDATADYICKVKWGDIEFPPPFGR	2780.36	2780.36	-0.0038	25.32
3	ACLY_MOUSE	ATP-citrate synthase OS=Mus musculus GN=Acly PE=1 SV=1	VDATADYICKVKWGDIEFPPPFGR	2780.36	2780.36	-0.0027	25.59
3	ACLY_MOUSE	ATP-citrate synthase OS=Mus musculus GN=Acly PE=1 SV=1	NFLIEPFVPHSQAEEFYVCIYATR	2929.41	2929.41	-0.0049	47.59
3	ACLY_MOUSE	ATP-citrate synthase OS=Mus musculus GN=Acly PE=1 SV=1	NFLIEPFVPHSQAEEFYVCIYATR	2929.41	2929.41	-0.003	56.01
4	TBA1B_MOUSE	ATP-citrate synthase OS=Mus musculus GN=Acly PE=1 SV=1	YQDTPGVKMIVVLGEIGGTEEYKICR	2954.48	2954.49	-0.0036	53.28
4	TBA1B_MOUSE	Tubulin alpha-1B chain OS=Mus musculus GN=Tuba1b PE=1 SV=2	YMACCLLYR	1248.54	1248.55	-0.0024	39.95
4	TBA1B_MOUSE	Tubulin alpha-1B chain OS=Mus musculus GN=Tuba1b PE=1 SV=2	YMACCLLYR	1248.54	1248.55	-0.0019	40
4	TBA1B_MOUSE	Tubulin alpha-1B chain OS=Mus musculus GN=Tuba1b PE=1 SV=2	YMACCLLYR	1264.54	1264.54	-0.0026	36.92
4	TBA1B_MOUSE	Tubulin alpha-1B chain OS=Mus musculus GN=Tuba1b PE=1 SV=2	YMACCLLYR	1264.54	1264.54	-0.0012	40.27
4	TBA1B_MOUSE	Tubulin alpha-1B chain OS=Mus musculus GN=Tuba1b PE=1 SV=2	SIQFVDWCPTGFK	1583.74	1583.74	-0.0025	69.27
4	TBA1B_MOUSE	Tubulin alpha-1B chain OS=Mus musculus GN=Tuba1b PE=1 SV=2	SIQFVDWCPTGFK	1583.74	1583.74	-0.0009	61.16
4	TBA1B_MOUSE	Tubulin alpha-1B chain OS=Mus musculus GN=Tuba1b PE=1 SV=2	AVCMLSNTTAIAEAWAR	1863.89	1863.9	-0.0029	49.84
4	TBA1B_MOUSE	Tubulin alpha-1B chain OS=Mus musculus GN=Tuba1b PE=1 SV=2	AVCMLSNTTAIAEAWAR	1863.89	1863.9	-0.0025	84.35
4	TBA1B_MOUSE	Tubulin alpha-1B chain OS=Mus musculus GN=Tuba1b PE=1 SV=2	AVCMLSNTTAIAEAWAR	1863.89	1863.9	-0.0021	87.23
4	TBA1B_MOUSE	Tubulin alpha-1B chain OS=Mus musculus GN=Tuba1b PE=1 SV=2	AVCMLSNTTAIAEAWAR	1863.9	1863.9	-0.0018	32.04
4	TBA1B_MOUSE	Tubulin alpha-1B chain OS=Mus musculus GN=Tuba1b PE=1 SV=2	AVCMLSNTTAIAEAWAR	1863.9	1863.9	-0.0015	53.16
4	TBA1B_MOUSE	Tubulin alpha-1B chain OS=Mus musculus GN=Tuba1b PE=1 SV=2	AVCMLSNTTAIAEAWAR	1879.89	1879.89	-0.0023	66.53
4	TBA1B_MOUSE	Tubulin alpha-1B chain OS=Mus musculus GN=Tuba1b PE=1 SV=2	AVCMLSNTTAIAEAWAR	1879.89	1879.89	0.0002	70.54
4	TBA1B_MOUSE	Tubulin alpha-1B chain OS=Mus musculus GN=Tuba1b PE=1 SV=2	AYHEQLSVAEITNACFEPANQMVK	2749.28	2749.28	-0.0044	43.26
4	TBA1B_MOUSE	Tubulin alpha-1B chain OS=Mus musculus GN=Tuba1b PE=1 SV=2	AYHEQLSVAEITNACFEPANQMVK	2749.28	2749.28	-0.0019	51.98
4	TBA1B_MOUSE	Tubulin alpha-1B chain OS=Mus musculus GN=Tuba1b PE=1 SV=2	LADQCTGLQGFLVFHSFGGGTGSGFTSLLMER	3389.61	3389.62	-0.0051	55.75
4	TBA1B_MOUSE	Tubulin alpha-1B chain OS=Mus musculus GN=Tuba1b PE=1 SV=2	LADQCTGLQGFLVFHSFGGGTGSGFTSLLMER	3389.61	3389.62	-0.005	93.55
4	TBA1B_MOUSE	Tubulin alpha-1B chain OS=Mus musculus GN=Tuba1b PE=1 SV=2	LADQCTGLQGFLVFHSFGGGTGSGFTSLLMER	3389.62	3389.62	-0.0017	98.4
4	TBA1B_MOUSE	Tubulin alpha-1B chain OS=Mus musculus GN=Tuba1b PE=1 SV=2	LADQCTGLQGFLVFHSFGGGTGSGFTSLLMER	3389.62	3389.62	0.0074	62.61
4	TBA1B_MOUSE	Tubulin alpha-1B chain OS=Mus musculus GN=Tuba1b PE=1 SV=2	LADQCTGLQGFLVFHSFGGGTGSGFTSLLMER	3405.61	3405.61	-0.0071	99.53
5	ACTG_MOUSE	Tubulin alpha-1B chain OS=Mus musculus GN=Tuba1b PE=1 SV=2	LADQCTGLQGFLVFHSFGGGTGSGFTSLLMER	3405.61	3405.61	-0.0046	101.09
5	ACTG_MOUSE	Actin, cytoplasmic 2 OS=Mus musculus GN=Actg1 PE=1 SV=1	CDVDIR	776.347	776.349	-0.0015	28.56
5	ACTG_MOUSE	Actin, cytoplasmic 2 OS=Mus musculus GN=Actg1 PE=1 SV=1	CDVDIR	776.347	776.349	-0.0013	35.57
5	ACTG_MOUSE	Actin, cytoplasmic 2 OS=Mus musculus GN=Actg1 PE=1 SV=1	CDVDIR	776.347	776.349	-0.0012	30.95
5	ACTG_MOUSE	Actin, cytoplasmic 2 OS=Mus musculus GN=Actg1 PE=1 SV=1	CDVDIR	776.348	776.349	-0.0009	35.19
5	ACTG_MOUSE	Actin, cytoplasmic 2 OS=Mus musculus GN=Actg1 PE=1 SV=1	EEEIAALVIDNGSGMCK	1876.85	1876.85	-0.0031	108.19
5	ACTG_MOUSE	Actin, cytoplasmic 2 OS=Mus musculus GN=Actg1 PE=1 SV=1	QEYDESGPSIVHRKCF	1950.89	1950.89	-0.004	26.87
5	ACTG_MOUSE	Actin, cytoplasmic 2 OS=Mus musculus GN=Actg1 PE=1 SV=1	QEYDESGPSIVHRKCF	1950.89	1950.89	-0.0038	20.6
5	ACTG_MOUSE	Actin, cytoplasmic 2 OS=Mus musculus GN=Actg1 PE=1 SV=1	QEYDESGPSIVHRKCF	1950.89	1950.89	-0.0029	26.72
5	ACTG_MOUSE	Actin, cytoplasmic 2 OS=Mus musculus GN=Actg1 PE=1 SV=1	LCYVALDFEQEMATAASSSSLEK	2549.16	2549.17	-0.0072	119
5	ACTG_MOUSE	Actin, cytoplasmic 2 OS=Mus musculus GN=Actg1 PE=1 SV=1	LCYVALDFEQEMATAASSSSLEK	2549.16	2549.17	-0.0063	116.91
5	ACTG_MOUSE	Actin, cytoplasmic 2 OS=Mus musculus GN=Actg1 PE=1 SV=1	LCYVALDFEQEMATAASSSSLEK	2549.16	2549.17	-0.0046	83.55
5	ACTG_MOUSE	Actin, cytoplasmic 2 OS=Mus musculus GN=Actg1 PE=1 SV=1	LCYVALDFEQEMATAASSSSLEK	2549.16	2549.17	-0.0039	63.9
5	ACTG_MOUSE	Actin, cytoplasmic 2 OS=Mus musculus GN=Actg1 PE=1 SV=1	LCYVALDFEQEMATAASSSSLEK	2549.16	2549.17	-0.0035	53.6
5	ACTG_MOUSE	Actin, cytoplasmic 2 OS=Mus musculus GN=Actg1 PE=1 SV=1	EKLCYVALDFEQEMATAASSSSLEK	2806.3	2806.3	-0.0046	44.99
5	ACTG_MOUSE	Actin, cytoplasmic 2 OS=Mus musculus GN=Actg1 PE=1 SV=1	DIKEKLCYVALDFEQEMATAASSSSLEK	3162.5	3162.51	-0.0085	88.18
5	ACTG_MOUSE	Actin, cytoplasmic 2 OS=Mus musculus GN=Actg1 PE=1 SV=1	DIKEKLCYVALDFEQEMATAASSSSLEK	3162.51	3162.51	-0.0049	79.31
5	ACTG_MOUSE	Actin, cytoplasmic 2 OS=Mus musculus GN=Actg1 PE=1 SV=1	CPEALFQPSFLGMESCGIHETTFNSIMK	3230.45	3230.45	-0.0033	54.45
5	ACTG_MOUSE	Actin, cytoplasmic 2 OS=Mus musculus GN=Actg1 PE=1 SV=1	FRCPEALFQPSFLGMESCGIHETTFNSIMK	3533.61	3533.62	-0.0102	59.42
5	ACTG_MOUSE	Actin, cytoplasmic 2 OS=Mus musculus GN=Actg1 PE=1 SV=1	FRCPEALFQPSFLGMESCGIHETTFNSIMK	3533.62	3533.62	-0.0081	25.42
6	TBA1C_MOUSE	Actin, cytoplasmic 2 OS=Mus musculus GN=Actg1 PE=1 SV=1	FRCPEALFQPSFLGMESCGIHETTFNSIMK	3533.62	3533.62	-0.0073	49.2
6	TBA1C_MOUSE	Tubulin alpha-1C chain OS=Mus musculus GN=Tuba1c PE=1 SV=1	YMACCLLYR	1248.54	1248.55	-0.0024	39.95
6	TBA1C_MOUSE	Tubulin alpha-1C chain OS=Mus musculus GN=Tuba1c PE=1 SV=1	YMACCLLYR	1248.54	1248.55	-0.0019	40
6	TBA1C_MOUSE	Tubulin alpha-1C chain OS=Mus musculus GN=Tuba1c PE=1 SV=1	YMACCLLYR	1264.54	1264.54	-0.0026	36.92
6	TBA1C_MOUSE	Tubulin alpha-1C chain OS=Mus musculus GN=Tuba1c PE=1 SV=1	YMACCLLYR	1264.54	1264.54	-0.0012	40.27
6	TBA1C_MOUSE	Tubulin alpha-1C chain OS=Mus musculus GN=Tuba1c PE=1 SV=1	TIQFVDWCPTGFK	1597.76	1597.76	-0.0017	58.59
6	TBA1C_MOUSE	Tubulin alpha-1C chain OS=Mus musculus GN=Tuba1c PE=1 SV=1	TIQFVDWCPTGFK	1597.76	1597.76	-0.0012	65.13
6	TBA1C_MOUSE	Tubulin alpha-1C chain OS=Mus musculus GN=Tuba1c PE=1 SV=1	AVCMLSNTTAIAEAWAR	1863.89	1863.9	-0.0029	49.84
6	TBA1C_MOUSE	Tubulin alpha-1C chain OS=Mus musculus GN=Tuba1c PE=1 SV=1	AVCMLSNTTAIAEAWAR	1863.89	1863.9	-0.0025	84.35
6	TBA1C_MOUSE	Tubulin alpha-1C chain OS=Mus musculus GN=Tuba1c PE=1 SV=1	AVCMLSNTTAIAEAWAR	1863.89	1863.9	-0.0021	87.23
6	TBA1C_MOUSE	Tubulin alpha-1C chain OS=Mus musculus GN=Tuba1c PE=1 SV=1	AVCMLSNTTAIAEAWAR	1863.9	1863.9	-0.0018	32.04
6	TBA1C_MOUSE	Tubulin alpha-1C chain OS=Mus musculus GN=Tuba1c PE=1 SV=1	AVCMLSNTTAIAEAWAR	1863.9	1863.9	-0.0015	53.16
6	TBA1C_MOUSE	Tubulin alpha-1C chain OS=Mus musculus GN=Tuba1c PE=1 SV=1	AVCMLSNTTAIAEAWAR	1879.89	1879.89	-0.0023	66.53
6	TBA1C_MOUSE	Tubulin alpha-1C chain OS=Mus musculus GN=Tuba1c PE=1 SV=1	AVCMLSNTTAIAEAWAR	1879.89	1879.89	0.0002	70.54
6	TBA1C_MOUSE	Tubulin alpha-1C chain OS=Mus musculus GN=Tuba1c PE=1 SV=1	LADQCTGLQGFLVFHSFGGGTGSGFTSLLMER	3389.61	3389.62	-0.0051	55.75
6	TBA1C_MOUSE	Tubulin alpha-1C chain OS=Mus musculus GN=Tuba1c PE=1 SV=1	LADQCTGLQGFLVFHSFGGGTGSGFTSLLMER	3389.61	3389.62	-0.005	93.55
6	TBA1C_MOUSE	Tubulin alpha-1C chain OS=Mus musculus GN=Tuba1c PE=1 SV=1	LADQCTGLQGFLVFHSFGGGTGSGFTSLLMER	3389.62	3389.62	-0.0017	98.4
6	TBA1C_MOUSE	Tubulin alpha-1C chain OS=Mus musculus GN=Tuba1c PE=1 SV=1	LADQCTGLQGFLVFHSFGGGTGSGFTSLLMER	3389.62	3389.62	0.0074	62.61
6	TBA1C_MOUSE	Tubulin alpha-1C chain OS=Mus musculus GN=Tuba1c PE=1 SV=1	LADQCTGLQGFLVFHSFGGGTGSGFTSLLMER	3405.61	3405.61	-0.0071	99.53
7	TBA1A_MOUSE	Tubulin alpha-1C chain OS=Mus musculus GN=Tuba1c PE=1 SV=1	LADQCTGLQGFLVFHSFGGGTGSGFTSLLMER	3405.61	3405.61	-0.0046	101.09
7	TBA1A_MOUSE	Tubulin alpha-1A chain OS=Mus musculus GN=Tuba1a PE=1 SV=1	YMACCLLYR	1248.54	1248.55	-0.0024	39.95
7	TBA1A_MOUSE	Tubulin alpha-1A chain OS=Mus musculus GN=Tuba1a PE=1 SV=1	YMACCLLYR	1248.54	1248.55	-0.0019	40
7	TBA1A_MOUSE	Tubulin alpha-1A chain OS=Mus musculus GN=Tuba1a PE=1 SV=1	YMACCLLYR	1264.54	1264.54	-0.0026	36.92
7	TBA1A_MOUSE	Tubulin alpha-1A chain OS=Mus musculus GN=Tuba1a PE=1 SV=1	YMACCLLYR	1264.54	1264.54	-0.0012	40.27
7	TBA1A_MOUSE	Tubulin alpha-1A chain OS=Mus musculus GN=Tuba1a PE=1 SV=1	TIQFVDWCPTGFK	1597.76	1597.76	-0.0017	58.59
7	TBA1A_MOUSE	Tubulin alpha-1A chain OS=Mus musculus GN=Tuba1a PE=1 SV=1	TIQFVDWCPTGFK	1597.76	1597.76	-0.0012	65.13
7	TBA1A_MOUSE	Tubulin alpha-1A chain OS=Mus musculus GN=Tuba1a PE=1 SV=1	AVCMLSNTTAIAEAWAR	1863.89	1863.9	-0.0029	49.84
7	TBA1A_MOUSE	Tubulin alpha-1A chain OS=Mus musculus GN=Tuba1a PE=1 SV=1	AVCMLSNTTAIAEAWAR	1863.89	1863.9	-0.0025	84.35
7	TBA1A_MOUSE	Tubulin alpha-1A chain OS=Mus musculus GN=Tuba1a PE=1 SV=1	AVCMLSNTTAIAEAWAR	1863.89	1863.9	-0.0021	87.23
7	TBA1A_MOUSE	Tubulin alpha-1A chain OS=Mus musculus GN=Tuba1a PE=1 SV=1	AVCMLSNTTAIAEAWAR	1863.9	1863.9	-0.0018	32.04
7	TBA1A_MOUSE	Tubulin alpha-1A chain OS=Mus musculus GN=Tuba1a PE=1 SV=1	AVCMLSNTTAIAEAWAR	1863.9	1863.9	-0.0015	53.16
7	TBA1A_MOUSE	Tubulin alpha-1A chain OS=Mus musculus GN=Tuba1a PE=1 SV=1	AVCMLSNTTAIAEAWAR	1879.89	1879.89	-0.0023	66.53
7	TBA1A_MOUSE	Tubulin alpha-1A chain OS=Mus musculus GN=Tuba1a PE=1 SV=1	AVCMLSNTTAIAEAWAR	1879.89	1879.89	0.0002	70.54
7	TBA1A_MOUSE	Tubulin alpha-1A chain OS=Mus musculus GN=Tuba1a PE=1 SV=1	AYHEQLSVAEITNACFEPANQMVK	2749.28	2749.28	-0.0044	43.26
7	TBA1A_MOUSE	Tubulin alpha-1A chain OS=Mus musculus GN=Tuba1a PE=1 SV=1	AYHEQLSVAEITNACFEPANQMVK	2749.28	2749.28	-0.0019	51.98
7	TBA1A_MOUSE	Tubulin alpha-1A chain OS=Mus musculus GN=Tuba1a PE=1 SV=1	LADQCTGLQGFLVFHSFGGGTGSGFTSLLMER	3389.61	3389.62	-0.0051	55.75
7	TBA1A_MOUSE	Tubulin alpha-1A chain OS=Mus musculus GN=Tuba1a PE=1 SV=1	LADQCTGLQGFLVFHSFGGGTGSGFTSLLMER	3389.61	3389.62	-0.005	93.55
7	TBA1A_MOUSE	Tubulin alpha-1A chain OS=Mus musculus GN=Tuba1a PE=1 SV=1	LADQCTGLQGFLVFHSFGGGTGSGFTSLLMER	3389.62	3389.62	-0.0017	98.4
7	TBA1A_MOUSE	Tubulin alpha-1A chain OS=Mus musculus GN=Tuba1a PE=1 SV=1	LADQCTGLQGFLVFHSFGGGTGSGFTSLLMER	3389.62	3389.62	0.0074	62.61
7	TBA1A_MOUSE	Tubulin alpha-1A chain OS=Mus musculus GN=Tuba1a PE=1 SV=1	LADQCTGLQGFLVFHSFGGGTGSGFTSLLMER	3405.61	3405.61	-0.0071	99.53
8	FAS_MOUSE	Tubulin alpha-1A chain OS=Mus musculus GN=Tuba1a PE=1 SV=1	LADQCTGLQGFLVFHSFGGGTGSGFTSLLMER	3405.61	3405.61	-0.0046	101.09
8	FAS_MOUSE	Fatty acid synthase OS=Mus musculus GN=Fasn PE=1 SV=2	SFDDSGSGYCR	1249.46	1249.47	-0.0029	42.24
8	FAS_MOUSE	Fatty acid synthase OS=Mus musculus GN=Fasn PE=1 SV=2	SFDDSGSGYCR	1249.47	1249.47	-0.0016	41.6
8	FAS_MOUSE	Fatty acid synthase OS=Mus musculus GN=Fasn PE=1 SV=2	SFYGTALFLCR	1333.65	1333.65	-0.0007	39.97
8	FAS_MOUSE	Fatty acid synthase OS=Mus musculus GN=Fasn PE=1 SV=2	ACVDTALENLSTLK	1533.77	1533.77	-0.0028	80.5
8	FAS_MOUSE	Fatty acid synthase OS=Mus musculus GN=Fasn PE=1 SV=2	VIFPGTGYLCLVWK	1651.88	1651.88	-0.0021	33.28
8	FAS_MOUSE	Fatty acid synthase OS=Mus musculus GN=Fasn PE=1 SV=2	CILLSNLSNTSHAPK	1653.85	1653.85	-0.0038	46.69
8	FAS_MOUSE	Fatty acid synthase OS=Mus musculus GN=Fasn PE=1 SV=2	CILLSNLSNTSHAPK	1653.85	1653.85	-0.0038	74.05
8	FAS_MOUSE	Fatty acid synthase OS=Mus musculus GN=Fasn PE=1 SV=2	CILLSNLSNTSHAPK	1653.85	1653.85	-0.0033	36.1
8	FAS_MOUSE	Fatty acid synthase OS=Mus musculus GN=Fasn PE=1 SV=2	CILLSNLSNTSHAPK	1653.85	1653.85	-0.0029	68.9
8	FAS_MOUSE	Fatty acid synthase OS=Mus musculus GN=Fasn PE=1 SV=2	IRCILLSNLSNTSHAPK	1923.03	1923.04	-0.0042	52.84
8	FAS_MOUSE	Fatty acid synthase OS=Mus musculus GN=Fasn PE=1 SV=2	EACPELDYFVAFSSVSCGR	2192.95	2192.95	-0.0041	89.77
8	FAS_MOUSE	Fatty acid synthase OS=Mus musculus GN=Fasn PE=1 SV=2	EACPELDYFVAFSSVSCGR	2192.95	2192.95	-0.0036	98.26
8	FAS_MOUSE	Fatty acid synthase OS=Mus musculus GN=Fasn PE=1 SV=2	GPSIALDTACSSSLLALQNAYQAIR	2619.33	2619.33	-0.006	47.13
8	FAS_MOUSE	Fatty acid synthase OS=Mus musculus GN=Fasn PE=1 SV=2	GPSIALDTACSSSLLALQNAYQAIR	2619.33	2619.33	-0.0027	52.8
8	FAS_MOUSE	Fatty acid synthase OS=Mus musculus GN=Fasn PE=1 SV=2	ISSCMEVLDLFLNQPHAVLSSFVLAEK	3046.54	3046.55	-0.0118	56.54
8	FAS_MOUSE	Fatty acid synthase OS=Mus musculus GN=Fasn PE=1 SV=2	ISSCMEVLDLFLNQPHAVLSSFVLAEK	3046.55	3046.55	-0.0034	61.11
8	FAS_MOUSE	Fatty acid synthase OS=Mus musculus GN=Fasn PE=1 SV=2	ISSCMEVLDLFLNQPHAVLSSFVLAEK	3062.54	3062.55	-0.004	66.24
8	FAS_MOUSE	Fatty acid synthase OS=Mus musculus GN=Fasn PE=1 SV=2	ISSCMEVLDLFLNQPHAVLSSFVLAEK	3062.54	3062.55	-0.0015	73.79
8	FAS_MOUSE	Fatty acid synthase OS=Mus musculus GN=Fasn PE=1 SV=2	LSVPTYGLQCTQAAPLDSIPNLAAYYIDCIK	3454.71	3454.72	-0.0082	75.72
8	FAS_MOUSE	Fatty acid synthase OS=Mus musculus GN=Fasn PE=1 SV=2	LSVPTYGLQCTQAAPLDSIPNLAAYYIDCIK	3454.71	3454.72	-0.0023	63.1
8	FAS_MOUSE	Fatty acid synthase OS=Mus musculus GN=Fasn PE=1 SV=2	LLLPEDPLISGLLNSQALKACVDTALENLSTLK	3548.94	3548.94	-0.0022	31.51
8	FAS_MOUSE	Fatty acid synthase OS=Mus musculus GN=Fasn PE=1 SV=2	GHALGETLACLPSEVQPAPSLLSQEEWESLFSR	3637.75	3637.77	-0.0189	26.44
8	FAS_MOUSE	Fatty acid synthase OS=Mus musculus GN=Fasn PE=1 SV=2	GHALGETLACLPSEVQPAPSLLSQEEWESLFSR	3637.77	3637.77	-0.0059	74.55
9	AT2A2_MOUSE	Fatty acid synthase OS=Mus musculus GN=Fasn PE=1 SV=2	GHALGETLACLPSEVQPAPSLLSQEEWESLFSR	3637.77	3637.77	-0.0011	79.1
9	AT2A2_MOUSE	Sarcoplasmic/endoplasmic reticulum calcium ATPase 2 OS=Mus musculus GN=Atp2a2 PE=1 SV=2	GTAVAICR	846.437	846.438	-0.0013	21.64
9	AT2A2_MOUSE	Sarcoplasmic/endoplasmic reticulum calcium ATPase 2 OS=Mus musculus GN=Atp2a2 PE=1 SV=2	GTAVAICR	846.437	846.438	-0.0011	44.81
9	AT2A2_MOUSE	Sarcoplasmic/endoplasmic reticulum calcium ATPase 2 OS=Mus musculus GN=Atp2a2 PE=1 SV=2	GTAVAICR	846.437	846.438	-0.0009	46.24
9	AT2A2_MOUSE	Sarcoplasmic/endoplasmic reticulum calcium ATPase 2 OS=Mus musculus GN=Atp2a2 PE=1 SV=2	ANACNSVIK	975.48	975.481	-0.0013	51.79
9	AT2A2_MOUSE	Sarcoplasmic/endoplasmic reticulum calcium ATPase 2 OS=Mus musculus GN=Atp2a2 PE=1 SV=2	ANACNSVIK	975.48	975.481	-0.0012	58.9
9	AT2A2_MOUSE	Sarcoplasmic/endoplasmic reticulum calcium ATPase 2 OS=Mus musculus GN=Atp2a2 PE=1 SV=2	ANACNSVIK	975.48	975.481	-0.0009	20.1
9	AT2A2_MOUSE	Sarcoplasmic/endoplasmic reticulum calcium ATPase 2 OS=Mus musculus GN=Atp2a2 PE=1 SV=2	GTAVAICRR	1002.54	1002.54	-0.0016	25.84
9	AT2A2_MOUSE	Sarcoplasmic/endoplasmic reticulum calcium ATPase 2 OS=Mus musculus GN=Atp2a2 PE=1 SV=2	CLALATHDNPLK	1351.69	1351.69	-0.0025	58.32
9	AT2A2_MOUSE	Sarcoplasmic/endoplasmic reticulum calcium ATPase 2 OS=Mus musculus GN=Atp2a2 PE=1 SV=2	CLALATHDNPLK	1351.69	1351.69	-0.0022	33.84
9	AT2A2_MOUSE	Sarcoplasmic/endoplasmic reticulum calcium ATPase 2 OS=Mus musculus GN=Atp2a2 PE=1 SV=2	CLALATHDNPLK	1351.69	1351.69	-0.0022	31.65
9	AT2A2_MOUSE	Sarcoplasmic/endoplasmic reticulum calcium ATPase 2 OS=Mus musculus GN=Atp2a2 PE=1 SV=2	TGTLTTNQMSVCR	1483.67	1483.68	-0.0019	48.33
9	AT2A2_MOUSE	Sarcoplasmic/endoplasmic reticulum calcium ATPase 2 OS=Mus musculus GN=Atp2a2 PE=1 SV=2	VGEATETALTCLVEK	1619.81	1619.81	-0.0024	84.7
9	AT2A2_MOUSE	Sarcoplasmic/endoplasmic reticulum calcium ATPase 2 OS=Mus musculus GN=Atp2a2 PE=1 SV=2	VGEATETALTCLVEK	1619.81	1619.81	-0.0022	95.13
9	AT2A2_MOUSE	Sarcoplasmic/endoplasmic reticulum calcium ATPase 2 OS=Mus musculus GN=Atp2a2 PE=1 SV=2	VSFYQLSHFLQCK	1655.81	1655.81	-0.0027	38.87
9	AT2A2_MOUSE	Sarcoplasmic/endoplasmic reticulum calcium ATPase 2 OS=Mus musculus GN=Atp2a2 PE=1 SV=2	VSFYQLSHFLQCK	1655.81	1655.81	-0.0022	35.83
9	AT2A2_MOUSE	Sarcoplasmic/endoplasmic reticulum calcium ATPase 2 OS=Mus musculus GN=Atp2a2 PE=1 SV=2	VSFYQLSHFLQCK	1655.81	1655.81	-0.0018	53.27
9	AT2A2_MOUSE	Sarcoplasmic/endoplasmic reticulum calcium ATPase 2 OS=Mus musculus GN=Atp2a2 PE=1 SV=2	NYLEQPGKECVQPATK	1860.9	1860.9	-0.0034	73.32
9	AT2A2_MOUSE	Sarcoplasmic/endoplasmic reticulum calcium ATPase 2 OS=Mus musculus GN=Atp2a2 PE=1 SV=2	NYLEQPGKECVQPATK	1860.9	1860.9	-0.0031	46.83
9	AT2A2_MOUSE	Sarcoplasmic/endoplasmic reticulum calcium ATPase 2 OS=Mus musculus GN=Atp2a2 PE=1 SV=2	NYLEQPGKECVQPATK	1860.9	1860.9	-0.003	51.03
9	AT2A2_MOUSE	Sarcoplasmic/endoplasmic reticulum calcium ATPase 2 OS=Mus musculus GN=Atp2a2 PE=1 SV=2	NYLEQPGKECVQPATK	1860.9	1860.9	-0.0026	61.91
9	AT2A2_MOUSE	Sarcoplasmic/endoplasmic reticulum calcium ATPase 2 OS=Mus musculus GN=Atp2a2 PE=1 SV=2	SLPSVETLGCTSVICSDK	1951.92	1951.92	-0.0042	62.02
9	AT2A2_MOUSE	Sarcoplasmic/endoplasmic reticulum calcium ATPase 2 OS=Mus musculus GN=Atp2a2 PE=1 SV=2	SLPSVETLGCTSVICSDK	1951.92	1951.92	-0.0036	83.11
9	AT2A2_MOUSE	Sarcoplasmic/endoplasmic reticulum calcium ATPase 2 OS=Mus musculus GN=Atp2a2 PE=1 SV=2	EWGSGSDTLRCLALATHDNPLK	2440.18	2440.18	-0.0032	49.91
9	AT2A2_MOUSE	Sarcoplasmic/endoplasmic reticulum calcium ATPase 2 OS=Mus musculus GN=Atp2a2 PE=1 SV=2	EWGSGSDTLRCLALATHDNPLK	2440.18	2440.18	-0.0001	58.24
9	AT2A2_MOUSE	Sarcoplasmic/endoplasmic reticulum calcium ATPase 2 OS=Mus musculus GN=Atp2a2 PE=1 SV=2	VEGDTCSLNEFSITGSTYAPIGEVQK	2801.3	2801.31	-0.0039	20.34
9	AT2A2_MOUSE	Sarcoplasmic/endoplasmic reticulum calcium ATPase 2 OS=Mus musculus GN=Atp2a2 PE=1 SV=2	CHQYDGLVELATICALCNDSALDYNEAK	3242.43	3242.43	-0.0044	86.9
10	UBA1_MOUSE	Sarcoplasmic/endoplasmic reticulum calcium ATPase 2 OS=Mus musculus GN=Atp2a2 PE=1 SV=2	CHQYDGLVELATICALCNDSALDYNEAK	3242.43	3242.43	-0.0037	103.98
10	UBA1_MOUSE	Ubiquitin-like modifier-activating enzyme 1 OS=Mus musculus GN=Uba1 PE=1 SV=1	CVYYR	759.336	759.337	-0.0011	23.6
10	UBA1_MOUSE	Ubiquitin-like modifier-activating enzyme 1 OS=Mus musculus GN=Uba1 PE=1 SV=1	CVYYR	759.336	759.337	-0.001	27.26
10	UBA1_MOUSE	Ubiquitin-like modifier-activating enzyme 1 OS=Mus musculus GN=Uba1 PE=1 SV=1	VGEFCHSR	990.433	990.434	-0.0013	55.42
10	UBA1_MOUSE	Ubiquitin-like modifier-activating enzyme 1 OS=Mus musculus GN=Uba1 PE=1 SV=1	VGEFCHSR	990.433	990.434	-0.001	48.77
10	UBA1_MOUSE	Ubiquitin-like modifier-activating enzyme 1 OS=Mus musculus GN=Uba1 PE=1 SV=1	DNPGVVTCLDEAR	1444.66	1444.66	-0.0026	76.6
10	UBA1_MOUSE	Ubiquitin-like modifier-activating enzyme 1 OS=Mus musculus GN=Uba1 PE=1 SV=1	DNPGVVTCLDEAR	1444.66	1444.66	-0.0021	67.68
10	UBA1_MOUSE	Ubiquitin-like modifier-activating enzyme 1 OS=Mus musculus GN=Uba1 PE=1 SV=1	YFLVGAGAIGCELLK	1609.85	1609.85	-0.0035	24.14
10	UBA1_MOUSE	Ubiquitin-like modifier-activating enzyme 1 OS=Mus musculus GN=Uba1 PE=1 SV=1	YFLVGAGAIGCELLK	1609.85	1609.85	-0.0032	91.35
10	UBA1_MOUSE	Ubiquitin-like modifier-activating enzyme 1 OS=Mus musculus GN=Uba1 PE=1 SV=1	YFLVGAGAIGCELLK	1609.85	1609.85	-0.0027	32.46
10	UBA1_MOUSE	Ubiquitin-like modifier-activating enzyme 1 OS=Mus musculus GN=Uba1 PE=1 SV=1	YFLVGAGAIGCELLK	1609.85	1609.85	-0.0018	90.27
10	UBA1_MOUSE	Ubiquitin-like modifier-activating enzyme 1 OS=Mus musculus GN=Uba1 PE=1 SV=1	IIPAIATTTAAVVGLVCLELYK	2315.31	2315.32	-0.0053	58.27
10	UBA1_MOUSE	Ubiquitin-like modifier-activating enzyme 1 OS=Mus musculus GN=Uba1 PE=1 SV=1	IIPAIATTTAAVVGLVCLELYK	2315.31	2315.32	-0.0047	37.4
10	UBA1_MOUSE	Ubiquitin-like modifier-activating enzyme 1 OS=Mus musculus GN=Uba1 PE=1 SV=1	IIPAIATTTAAVVGLVCLELYK	2315.31	2315.32	-0.0047	42.57
10	UBA1_MOUSE	Ubiquitin-like modifier-activating enzyme 1 OS=Mus musculus GN=Uba1 PE=1 SV=1	VLGPYTFSICDTSNFSDYIR	2354.08	2354.09	-0.0041	87.15
10	UBA1_MOUSE	Ubiquitin-like modifier-activating enzyme 1 OS=Mus musculus GN=Uba1 PE=1 SV=1	VLGPYTFSICDTSNFSDYIR	2354.09	2354.09	-0.0026	94.54
10	UBA1_MOUSE	Ubiquitin-like modifier-activating enzyme 1 OS=Mus musculus GN=Uba1 PE=1 SV=1	VLGPYTFSICDTSNFSDYIR	2354.09	2354.09	-0.0023	41.93
10	UBA1_MOUSE	Ubiquitin-like modifier-activating enzyme 1 OS=Mus musculus GN=Uba1 PE=1 SV=1	FMPIMQWLYFDALECLPEDK	2545.17	2545.17	-0.002	28.8
10	UBA1_MOUSE	Ubiquitin-like modifier-activating enzyme 1 OS=Mus musculus GN=Uba1 PE=1 SV=1	ALVLELCCNDESGEDVEVPYVR	2565.16	2565.17	-0.009	36.18
10	UBA1_MOUSE	Ubiquitin-like modifier-activating enzyme 1 OS=Mus musculus GN=Uba1 PE=1 SV=1	PAQLHIGFQALHQFCALHNQPPRPR	2932.51	2932.51	-0.0082	22.32
10	UBA1_MOUSE	Ubiquitin-like modifier-activating enzyme 1 OS=Mus musculus GN=Uba1 PE=1 SV=1	PAQLHIGFQALHQFCALHNQPPRPR	2932.51	2932.51	-0.008	66.87
10	UBA1_MOUSE	Ubiquitin-like modifier-activating enzyme 1 OS=Mus musculus GN=Uba1 PE=1 SV=1	PAQLHIGFQALHQFCALHNQPPRPR	2932.51	2932.51	-0.0068	27.59
10	UBA1_MOUSE	Ubiquitin-like modifier-activating enzyme 1 OS=Mus musculus GN=Uba1 PE=1 SV=1	PAQLHIGFQALHQFCALHNQPPRPR	2932.51	2932.51	-0.0067	27.4
10	UBA1_MOUSE	Ubiquitin-like modifier-activating enzyme 1 OS=Mus musculus GN=Uba1 PE=1 SV=1	PAQLHIGFQALHQFCALHNQPPRPR	2932.51	2932.51	-0.0065	39.44
10	UBA1_MOUSE	Ubiquitin-like modifier-activating enzyme 1 OS=Mus musculus GN=Uba1 PE=1 SV=1	PAQLHIGFQALHQFCALHNQPPRPR	2932.51	2932.51	-0.0056	55.37
10	UBA1_MOUSE	Ubiquitin-like modifier-activating enzyme 1 OS=Mus musculus GN=Uba1 PE=1 SV=1	PQTWGDCVTWACHHWHTQYCNNIR	3126.31	3126.32	-0.0075	24.16
10	UBA1_MOUSE	Ubiquitin-like modifier-activating enzyme 1 OS=Mus musculus GN=Uba1 PE=1 SV=1	PQTWGDCVTWACHHWHTQYCNNIR	3126.31	3126.32	-0.0048	43.76
11	KPYM_MOUSE	Ubiquitin-like modifier-activating enzyme 1 OS=Mus musculus GN=Uba1 PE=1 SV=1	PQTWGDCVTWACHHWHTQYCNNIR	3126.32	3126.32	-0.0033	42.74
11	KPYM_MOUSE	Pyruvate kinase PKM OS=Mus musculus GN=Pkm PE=1 SV=4	GIFPVLCK	932.513	932.515	-0.0021	26.72
11	KPYM_MOUSE	Pyruvate kinase PKM OS=Mus musculus GN=Pkm PE=1 SV=4	GIFPVLCK	932.514	932.515	-0.0019	32.92
11	KPYM_MOUSE	Pyruvate kinase PKM OS=Mus musculus GN=Pkm PE=1 SV=4	GIFPVLCK	932.514	932.515	-0.0018	34.34
11	KPYM_MOUSE	Pyruvate kinase PKM OS=Mus musculus GN=Pkm PE=1 SV=4	GIFPVLCK	932.514	932.515	-0.0015	26.64
11	KPYM_MOUSE	Pyruvate kinase PKM OS=Mus musculus GN=Pkm PE=1 SV=4	CCSGAIIVLTK	1220.62	1220.63	-0.0026	70.56
11	KPYM_MOUSE	Pyruvate kinase PKM OS=Mus musculus GN=Pkm PE=1 SV=4	CCSGAIIVLTK	1220.62	1220.63	-0.0022	67.72
11	KPYM_MOUSE	Pyruvate kinase PKM OS=Mus musculus GN=Pkm PE=1 SV=4	NTGIICTIGPASR	1358.7	1358.7	-0.0023	34.71
11	KPYM_MOUSE	Pyruvate kinase PKM OS=Mus musculus GN=Pkm PE=1 SV=4	NTGIICTIGPASR	1358.7	1358.7	-0.0023	76.87
11	KPYM_MOUSE	Pyruvate kinase PKM OS=Mus musculus GN=Pkm PE=1 SV=4	NTGIICTIGPASR	1358.7	1358.7	-0.0022	72.57
11	KPYM_MOUSE	Pyruvate kinase PKM OS=Mus musculus GN=Pkm PE=1 SV=4	NTGIICTIGPASR	1358.7	1358.7	-0.0019	22.21
11	KPYM_MOUSE	Pyruvate kinase PKM OS=Mus musculus GN=Pkm PE=1 SV=4	NTGIICTIGPASR	1358.7	1358.7	-0.0011	55.04
11	KPYM_MOUSE	Pyruvate kinase PKM OS=Mus musculus GN=Pkm PE=1 SV=4	NTGIICTIGPASR	1358.7	1358.7	-0.001	41
11	KPYM_MOUSE	Pyruvate kinase PKM OS=Mus musculus GN=Pkm PE=1 SV=4	NTGIICTIGPASR	1358.7	1358.7	-0.0009	32.31
11	KPYM_MOUSE	Pyruvate kinase PKM OS=Mus musculus GN=Pkm PE=1 SV=4	NTGIICTIGPASR	1358.7	1358.7	-0.0006	34.4
11	KPYM_MOUSE	Pyruvate kinase PKM OS=Mus musculus GN=Pkm PE=1 SV=4	NTGIICTIGPASR	1358.7	1358.7	-0.0005	25.66
11	KPYM_MOUSE	Pyruvate kinase PKM OS=Mus musculus GN=Pkm PE=1 SV=4	NTGIICTIGPASR	1358.7	1358.7	0.0001	27.49
11	KPYM_MOUSE	Pyruvate kinase PKM OS=Mus musculus GN=Pkm PE=1 SV=4	NTGIICTIGPASR	1358.7	1358.7	0.0005	21.43
11	KPYM_MOUSE	Pyruvate kinase PKM OS=Mus musculus GN=Pkm PE=1 SV=4	CDENILWLDYK	1467.67	1467.67	-0.0022	59.54
11	KPYM_MOUSE	Pyruvate kinase PKM OS=Mus musculus GN=Pkm PE=1 SV=4	CDENILWLDYK	1467.67	1467.67	-0.0021	66.5
11	KPYM_MOUSE	Pyruvate kinase PKM OS=Mus musculus GN=Pkm PE=1 SV=4	AEGSDVANAVLDGADCIMLSGETAK	2493.13	2493.14	-0.0049	86.4
11	KPYM_MOUSE	Pyruvate kinase PKM OS=Mus musculus GN=Pkm PE=1 SV=4	GIFPVLCKDAVLNAWAEDVDLR	2500.27	2500.28	-0.0042	96.45
11	KPYM_MOUSE	Pyruvate kinase PKM OS=Mus musculus GN=Pkm PE=1 SV=4	GIFPVLCKDAVLNAWAEDVDLR	2500.28	2500.28	-0.002	109.51
11	KPYM_MOUSE	Pyruvate kinase PKM OS=Mus musculus GN=Pkm PE=1 SV=4	GIFPVLCKDAVLNAWAEDVDLR	2500.28	2500.28	-0.0015	48.73
11	KPYM_MOUSE	Pyruvate kinase PKM OS=Mus musculus GN=Pkm PE=1 SV=4	GIFPVLCKDAVLNAWAEDVDLR	2500.28	2500.28	-0.0013	45.27
11	KPYM_MOUSE	Pyruvate kinase PKM OS=Mus musculus GN=Pkm PE=1 SV=4	PHSEAGTAFIQTQQLHAAMADTFLEHMCR	3297.51	3297.51	-0.0028	23.01
11	KPYM_MOUSE	Pyruvate kinase PKM OS=Mus musculus GN=Pkm PE=1 SV=4	LAPITSDPTEAAAVGAVEASFKCCSGAIIVLTK	3346.71	3346.72	-0.0067	45.48
12	COPG1_MOUSE	Pyruvate kinase PKM OS=Mus musculus GN=Pkm PE=1 SV=4	LAPITSDPTEAAAVGAVEASFKCCSGAIIVLTK	3346.71	3346.72	-0.0012	48.05
12	COPG1_MOUSE	Coatomer subunit gamma-1 OS=Mus musculus GN=Copg1 PE=2 SV=1	VVVVQAISALCQK	1413.8	1413.8	-0.0014	22.97
12	COPG1_MOUSE	Coatomer subunit gamma-1 OS=Mus musculus GN=Copg1 PE=2 SV=1	DSPLFDFIESCLR	1597.74	1597.74	-0.0032	43.61
12	COPG1_MOUSE	Coatomer subunit gamma-1 OS=Mus musculus GN=Copg1 PE=2 SV=1	DSPLFDFIESCLR	1597.74	1597.74	-0.0021	40.43
12	COPG1_MOUSE	Coatomer subunit gamma-1 OS=Mus musculus GN=Copg1 PE=2 SV=1	DSPLFDFIESCLR	1597.74	1597.74	-0.0013	59.43
12	COPG1_MOUSE	Coatomer subunit gamma-1 OS=Mus musculus GN=Copg1 PE=2 SV=1	DSPLFDFIESCLR	1597.74	1597.74	-0.0013	51.25
12	COPG1_MOUSE	Coatomer subunit gamma-1 OS=Mus musculus GN=Copg1 PE=2 SV=1	ELAPAVSVLQLFCSSPK	1844.97	1844.97	-0.0034	42.82
12	COPG1_MOUSE	Coatomer subunit gamma-1 OS=Mus musculus GN=Copg1 PE=2 SV=1	ELAPAVSVLQLFCSSPK	1844.97	1844.97	-0.0034	35.93
12	COPG1_MOUSE	Coatomer subunit gamma-1 OS=Mus musculus GN=Copg1 PE=2 SV=1	ELAPAVSVLQLFCSSPK	1844.97	1844.97	-0.0032	78.97
12	COPG1_MOUSE	Coatomer subunit gamma-1 OS=Mus musculus GN=Copg1 PE=2 SV=1	ELAPAVSVLQLFCSSPK	1844.97	1844.97	-0.0031	86.2
12	COPG1_MOUSE	Coatomer subunit gamma-1 OS=Mus musculus GN=Copg1 PE=2 SV=1	AIVDCIISIIEENSESK	1918.95	1918.96	-0.0033	50.76
12	COPG1_MOUSE	Coatomer subunit gamma-1 OS=Mus musculus GN=Copg1 PE=2 SV=1	AIVDCIISIIEENSESK	1918.95	1918.96	-0.0032	85.4
12	COPG1_MOUSE	Coatomer subunit gamma-1 OS=Mus musculus GN=Copg1 PE=2 SV=1	AIVDCIISIIEENSESK	1918.95	1918.96	-0.0031	44.58
12	COPG1_MOUSE	Coatomer subunit gamma-1 OS=Mus musculus GN=Copg1 PE=2 SV=1	AIVDCIISIIEENSESK	1918.95	1918.96	-0.0029	76.62
12	COPG1_MOUSE	Coatomer subunit gamma-1 OS=Mus musculus GN=Copg1 PE=2 SV=1	HPSAVTACNLDLENLVTDSNR	2325.1	2325.1	-0.0051	30.78
12	COPG1_MOUSE	Coatomer subunit gamma-1 OS=Mus musculus GN=Copg1 PE=2 SV=1	HPSAVTACNLDLENLVTDSNR	2325.1	2325.1	-0.004	72.98
12	COPG1_MOUSE	Coatomer subunit gamma-1 OS=Mus musculus GN=Copg1 PE=2 SV=1	HPSAVTACNLDLENLVTDSNR	2325.1	2325.1	-0.0027	77.87
12	COPG1_MOUSE	Coatomer subunit gamma-1 OS=Mus musculus GN=Copg1 PE=2 SV=1	ETGLSHLCEFIEDCEFTVLATR	2626.2	2626.2	-0.0045	65.53
12	COPG1_MOUSE	Coatomer subunit gamma-1 OS=Mus musculus GN=Copg1 PE=2 SV=1	ETGLSHLCEFIEDCEFTVLATR	2626.2	2626.2	-0.0043	68.18
12	COPG1_MOUSE	Coatomer subunit gamma-1 OS=Mus musculus GN=Copg1 PE=2 SV=1	ETGLSHLCEFIEDCEFTVLATR	2626.2	2626.2	-0.0023	49.92
13	EF1A1_MOUSE	Coatomer subunit gamma-1 OS=Mus musculus GN=Copg1 PE=2 SV=1	ETGLSHLCEFIEDCEFTVLATR	2626.21	2626.2	0.0069	42.5
13	EF1A1_MOUSE	Elongation factor 1-alpha 1 OS=Mus musculus GN=Eef1a1 PE=1 SV=3	DGSASGTTLLEALDCILPPTR	2186.09	2186.09	-0.0036	35.86
13	EF1A1_MOUSE	Elongation factor 1-alpha 1 OS=Mus musculus GN=Eef1a1 PE=1 SV=3	DGSASGTTLLEALDCILPPTR	2186.09	2186.09	-0.0028	25.98
13	EF1A1_MOUSE	Elongation factor 1-alpha 1 OS=Mus musculus GN=Eef1a1 PE=1 SV=3	DGSASGTTLLEALDCILPPTR	2186.09	2186.09	-0.0019	78.05
13	EF1A1_MOUSE	Elongation factor 1-alpha 1 OS=Mus musculus GN=Eef1a1 PE=1 SV=3	DGSASGTTLLEALDCILPPTRPTDK	2627.3	2627.31	-0.0072	58.62
13	EF1A1_MOUSE	Elongation factor 1-alpha 1 OS=Mus musculus GN=Eef1a1 PE=1 SV=3	DGSASGTTLLEALDCILPPTRPTDK	2627.3	2627.31	-0.0062	42.15
13	EF1A1_MOUSE	Elongation factor 1-alpha 1 OS=Mus musculus GN=Eef1a1 PE=1 SV=3	DGSASGTTLLEALDCILPPTRPTDK	2627.31	2627.31	-0.0032	35.89
13	EF1A1_MOUSE	Elongation factor 1-alpha 1 OS=Mus musculus GN=Eef1a1 PE=1 SV=3	DGSASGTTLLEALDCILPPTRPTDK	2627.31	2627.31	-0.0029	47.27
13	EF1A1_MOUSE	Elongation factor 1-alpha 1 OS=Mus musculus GN=Eef1a1 PE=1 SV=3	DGSASGTTLLEALDCILPPTRPTDK	2627.31	2627.31	-0.0025	49.61
13	EF1A1_MOUSE	Elongation factor 1-alpha 1 OS=Mus musculus GN=Eef1a1 PE=1 SV=3	DGSASGTTLLEALDCILPPTRPTDK	2627.31	2627.31	-0.002	47.79
13	EF1A1_MOUSE	Elongation factor 1-alpha 1 OS=Mus musculus GN=Eef1a1 PE=1 SV=3	KDGSASGTTLLEALDCILPPTRPTDK	2755.41	2755.41	-0.0012	22.15
13	EF1A1_MOUSE	Elongation factor 1-alpha 1 OS=Mus musculus GN=Eef1a1 PE=1 SV=3	NMITGTSQADCAVLIVAAGVGEFEAGISK	2908.42	2908.43	-0.0063	79.5
13	EF1A1_MOUSE	Elongation factor 1-alpha 1 OS=Mus musculus GN=Eef1a1 PE=1 SV=3	NMITGTSQADCAVLIVAAGVGEFEAGISK	2908.43	2908.43	-0.0009	93.28
13	EF1A1_MOUSE	Elongation factor 1-alpha 1 OS=Mus musculus GN=Eef1a1 PE=1 SV=3	NMITGTSQADCAVLIVAAGVGEFEAGISK	2924.42	2924.43	-0.0015	102.46
13	EF1A1_MOUSE	Elongation factor 1-alpha 1 OS=Mus musculus GN=Eef1a1 PE=1 SV=3	DGSASGTTLLEALDCILPPTRPTDKPLR	2993.54	2993.55	-0.0044	75.33
13	EF1A1_MOUSE	Elongation factor 1-alpha 1 OS=Mus musculus GN=Eef1a1 PE=1 SV=3	DGSASGTTLLEALDCILPPTRPTDKPLR	2993.55	2993.55	-0.0035	63.22
13	EF1A1_MOUSE	Elongation factor 1-alpha 1 OS=Mus musculus GN=Eef1a1 PE=1 SV=3	DGSASGTTLLEALDCILPPTRPTDKPLR	2993.55	2993.55	-0.0031	28.78
13	EF1A1_MOUSE	Elongation factor 1-alpha 1 OS=Mus musculus GN=Eef1a1 PE=1 SV=3	DGSASGTTLLEALDCILPPTRPTDKPLR	2993.55	2993.55	-0.0015	88.79
14	TBA4A_MOUSE	Elongation factor 1-alpha 1 OS=Mus musculus GN=Eef1a1 PE=1 SV=3	DFIKNMITGTSQADCAVLIVAAGVGEFEAGISK	3411.7	3411.71	-0.0077	22.8
14	TBA4A_MOUSE	Tubulin alpha-4A chain OS=Mus musculus GN=Tuba4a PE=1 SV=1	YMACCLLYR	1248.54	1248.55	-0.0024	39.95
14	TBA4A_MOUSE	Tubulin alpha-4A chain OS=Mus musculus GN=Tuba4a PE=1 SV=1	YMACCLLYR	1248.54	1248.55	-0.0019	40
14	TBA4A_MOUSE	Tubulin alpha-4A chain OS=Mus musculus GN=Tuba4a PE=1 SV=1	YMACCLLYR	1264.54	1264.54	-0.0026	36.92
14	TBA4A_MOUSE	Tubulin alpha-4A chain OS=Mus musculus GN=Tuba4a PE=1 SV=1	YMACCLLYR	1264.54	1264.54	-0.0012	40.27
14	TBA4A_MOUSE	Tubulin alpha-4A chain OS=Mus musculus GN=Tuba4a PE=1 SV=1	SIQFVDWCPTGFK	1583.74	1583.74	-0.0025	69.27
14	TBA4A_MOUSE	Tubulin alpha-4A chain OS=Mus musculus GN=Tuba4a PE=1 SV=1	SIQFVDWCPTGFK	1583.74	1583.74	-0.0009	61.16
14	TBA4A_MOUSE	Tubulin alpha-4A chain OS=Mus musculus GN=Tuba4a PE=1 SV=1	AVCMLSNTTAIAEAWAR	1863.89	1863.9	-0.0029	49.84
14	TBA4A_MOUSE	Tubulin alpha-4A chain OS=Mus musculus GN=Tuba4a PE=1 SV=1	AVCMLSNTTAIAEAWAR	1863.89	1863.9	-0.0025	84.35
14	TBA4A_MOUSE	Tubulin alpha-4A chain OS=Mus musculus GN=Tuba4a PE=1 SV=1	AVCMLSNTTAIAEAWAR	1863.89	1863.9	-0.0021	87.23
14	TBA4A_MOUSE	Tubulin alpha-4A chain OS=Mus musculus GN=Tuba4a PE=1 SV=1	AVCMLSNTTAIAEAWAR	1863.9	1863.9	-0.0018	32.04
14	TBA4A_MOUSE	Tubulin alpha-4A chain OS=Mus musculus GN=Tuba4a PE=1 SV=1	AVCMLSNTTAIAEAWAR	1863.9	1863.9	-0.0015	53.16
14	TBA4A_MOUSE	Tubulin alpha-4A chain OS=Mus musculus GN=Tuba4a PE=1 SV=1	AVCMLSNTTAIAEAWAR	1879.89	1879.89	-0.0023	66.53
14	TBA4A_MOUSE	Tubulin alpha-4A chain OS=Mus musculus GN=Tuba4a PE=1 SV=1	AVCMLSNTTAIAEAWAR	1879.89	1879.89	0.0002	70.54
14	TBA4A_MOUSE	Tubulin alpha-4A chain OS=Mus musculus GN=Tuba4a PE=1 SV=1	TIGGGDDSFTTFFCETGAGK	2066.89	2066.89	-0.0041	78.03
14	TBA4A_MOUSE	Tubulin alpha-4A chain OS=Mus musculus GN=Tuba4a PE=1 SV=1	AYHEQLSVAEITNACFEPANQMVK	2749.28	2749.28	-0.0044	43.26
14	TBA4A_MOUSE	Tubulin alpha-4A chain OS=Mus musculus GN=Tuba4a PE=1 SV=1	AYHEQLSVAEITNACFEPANQMVK	2749.28	2749.28	-0.0019	51.98
15	SYEP_MOUSE	Tubulin alpha-4A chain OS=Mus musculus GN=Tuba4a PE=1 SV=1	LSDQCTGLQGFLVFHSFGGGTGSGFTSLLMER	3421.61	3421.61	0.0006	66.01
15	SYEP_MOUSE	Bifunctional glutamate/proline--tRNA ligase OS=Mus musculus GN=Eprs PE=1 SV=4	SCQFVAVR	965.474	965.475	-0.0016	43.85
15	SYEP_MOUSE	Bifunctional glutamate/proline--tRNA ligase OS=Mus musculus GN=Eprs PE=1 SV=4	SCQFVAVR	965.474	965.475	-0.0013	43.77
15	SYEP_MOUSE	Bifunctional glutamate/proline--tRNA ligase OS=Mus musculus GN=Eprs PE=1 SV=4	VACQGEVVR	1016.51	1016.51	-0.002	51.06
15	SYEP_MOUSE	Bifunctional glutamate/proline--tRNA ligase OS=Mus musculus GN=Eprs PE=1 SV=4	LNQWCNVVR	1187.58	1187.59	-0.0023	47.45
15	SYEP_MOUSE	Bifunctional glutamate/proline--tRNA ligase OS=Mus musculus GN=Eprs PE=1 SV=4	LNQWCNVVR	1187.58	1187.59	-0.0021	42.55
15	SYEP_MOUSE	Bifunctional glutamate/proline--tRNA ligase OS=Mus musculus GN=Eprs PE=1 SV=4	GSQFGQSCCLR	1298.55	1298.55	-0.0015	47.73
15	SYEP_MOUSE	Bifunctional glutamate/proline--tRNA ligase OS=Mus musculus GN=Eprs PE=1 SV=4	QFAYQCSWGLTTR	1616.74	1616.74	-0.0028	54.73
15	SYEP_MOUSE	Bifunctional glutamate/proline--tRNA ligase OS=Mus musculus GN=Eprs PE=1 SV=4	EAPCILIYIPDGHTK	1725.87	1725.88	-0.003	34.39
15	SYEP_MOUSE	Bifunctional glutamate/proline--tRNA ligase OS=Mus musculus GN=Eprs PE=1 SV=4	EAPCILIYIPDGHTK	1725.88	1725.88	-0.0009	31.37
15	SYEP_MOUSE	Bifunctional glutamate/proline--tRNA ligase OS=Mus musculus GN=Eprs PE=1 SV=4	LGVENCYFPIFVSQAALEK	2184.09	2184.09	-0.0036	66.65
15	SYEP_MOUSE	Bifunctional glutamate/proline--tRNA ligase OS=Mus musculus GN=Eprs PE=1 SV=4	LGVENCYFPIFVSQAALEK	2184.09	2184.09	-0.0036	68.81
15	SYEP_MOUSE	Bifunctional glutamate/proline--tRNA ligase OS=Mus musculus GN=Eprs PE=1 SV=4	LGVENCYFPIFVSQAALEK	2184.09	2184.09	-0.0032	46.92
15	SYEP_MOUSE	Bifunctional glutamate/proline--tRNA ligase OS=Mus musculus GN=Eprs PE=1 SV=4	LGVENCYFPIFVSQAALEK	2184.09	2184.09	-0.0023	42.28
15	SYEP_MOUSE	Bifunctional glutamate/proline--tRNA ligase OS=Mus musculus GN=Eprs PE=1 SV=4	GFFICDQPYEPVSPYSCR	2220.95	2220.96	-0.0072	64
15	SYEP_MOUSE	Bifunctional glutamate/proline--tRNA ligase OS=Mus musculus GN=Eprs PE=1 SV=4	GFFICDQPYEPVSPYSCR	2220.96	2220.96	-0.0016	61.68
15	SYEP_MOUSE	Bifunctional glutamate/proline--tRNA ligase OS=Mus musculus GN=Eprs PE=1 SV=4	VASVQVVVIPCGITNALSEEDR	2355.21	2355.21	-0.004	30.05
15	SYEP_MOUSE	Bifunctional glutamate/proline--tRNA ligase OS=Mus musculus GN=Eprs PE=1 SV=4	VASVQVVVIPCGITNALSEEDR	2355.21	2355.21	-0.0034	57.59
15	SYEP_MOUSE	Bifunctional glutamate/proline--tRNA ligase OS=Mus musculus GN=Eprs PE=1 SV=4	VASVQVVVIPCGITNALSEEDR	2355.21	2355.21	-0.0021	59.73
15	SYEP_MOUSE	Bifunctional glutamate/proline--tRNA ligase OS=Mus musculus GN=Eprs PE=1 SV=4	AALCLTVNAGNPPLEALLAVEHVK	2541.36	2541.36	-0.006	39.31
15	SYEP_MOUSE	Bifunctional glutamate/proline--tRNA ligase OS=Mus musculus GN=Eprs PE=1 SV=4	AALCLTVNAGNPPLEALLAVEHVK	2541.36	2541.36	0.0004	44.73
15	SYEP_MOUSE	Bifunctional glutamate/proline--tRNA ligase OS=Mus musculus GN=Eprs PE=1 SV=4	YNVYPTYDFACPIVDSIEGVTHALR	2899.38	2899.39	-0.0043	64.03
16	TERA_MOUSE	Bifunctional glutamate/proline--tRNA ligase OS=Mus musculus GN=Eprs PE=1 SV=4	YNVYPTYDFACPIVDSIEGVTHALR	2899.38	2899.39	-0.0012	55
16	TERA_MOUSE	Transitional endoplasmic reticulum ATPase OS=Mus musculus GN=Vcp PE=1 SV=4	GVLFYGPPGCGK	1250.61	1250.61	-0.002	55.18
16	TERA_MOUSE	Transitional endoplasmic reticulum ATPase OS=Mus musculus GN=Vcp PE=1 SV=4	GVLFYGPPGCGK	1250.61	1250.61	-0.0018	52.91
16	TERA_MOUSE	Transitional endoplasmic reticulum ATPase OS=Mus musculus GN=Vcp PE=1 SV=4	LGDVISIQPCPDVK	1539.79	1539.8	-0.0026	55.66
16	TERA_MOUSE	Transitional endoplasmic reticulum ATPase OS=Mus musculus GN=Vcp PE=1 SV=4	LGDVISIQPCPDVK	1539.79	1539.8	-0.0022	56.52
16	TERA_MOUSE	Transitional endoplasmic reticulum ATPase OS=Mus musculus GN=Vcp PE=1 SV=4	AIANECQANFISIK	1577.78	1577.79	-0.0026	64.58
16	TERA_MOUSE	Transitional endoplasmic reticulum ATPase OS=Mus musculus GN=Vcp PE=1 SV=4	AIANECQANFISIK	1577.79	1577.79	-0.0008	73.1
16	TERA_MOUSE	Transitional endoplasmic reticulum ATPase OS=Mus musculus GN=Vcp PE=1 SV=4	QAAPCVLFFDELDSIAK	1922.94	1922.94	-0.0026	67.15
16	TERA_MOUSE	Transitional endoplasmic reticulum ATPase OS=Mus musculus GN=Vcp PE=1 SV=4	QAAPCVLFFDELDSIAK	1922.94	1922.94	-0.0022	68.15
16	TERA_MOUSE	Transitional endoplasmic reticulum ATPase OS=Mus musculus GN=Vcp PE=1 SV=4	QAAPCVLFFDELDSIAK	1922.94	1922.94	-0.002	59.64
16	TERA_MOUSE	Transitional endoplasmic reticulum ATPase OS=Mus musculus GN=Vcp PE=1 SV=4	QAAPCVLFFDELDSIAK	1922.94	1922.94	-0.0015	59.37
16	TERA_MOUSE	Transitional endoplasmic reticulum ATPase OS=Mus musculus GN=Vcp PE=1 SV=4	EDEEESLNEVGYDDIGGCR	2184.87	2184.88	-0.0051	112.42
16	TERA_MOUSE	Transitional endoplasmic reticulum ATPase OS=Mus musculus GN=Vcp PE=1 SV=4	EDEEESLNEVGYDDIGGCR	2184.87	2184.88	-0.0039	112.49
16	TERA_MOUSE	Transitional endoplasmic reticulum ATPase OS=Mus musculus GN=Vcp PE=1 SV=4	LADDVDLEQVANETHGHVGADLAALCSEAALQAIR	3671.77	3671.78	-0.0115	74.72
17	TBB4A_MOUSE	Transitional endoplasmic reticulum ATPase OS=Mus musculus GN=Vcp PE=1 SV=4	LADDVDLEQVANETHGHVGADLAALCSEAALQAIR	3671.78	3671.78	-0.0035	30.85
17	TBB4A_MOUSE	Tubulin beta-4A chain OS=Mus musculus GN=Tubb4a PE=1 SV=3	TAVCDIPPR	1027.51	1027.51	-0.0025	38.12
17	TBB4A_MOUSE	Tubulin beta-4A chain OS=Mus musculus GN=Tubb4a PE=1 SV=3	TAVCDIPPR	1027.51	1027.51	-0.0023	37.56
17	TBB4A_MOUSE	Tubulin beta-4A chain OS=Mus musculus GN=Tubb4a PE=1 SV=3	TAVCDIPPR	1027.51	1027.51	-0.0022	43.95
17	TBB4A_MOUSE	Tubulin beta-4A chain OS=Mus musculus GN=Tubb4a PE=1 SV=3	TAVCDIPPR	1027.51	1027.51	-0.0022	44.01
17	TBB4A_MOUSE	Tubulin beta-4A chain OS=Mus musculus GN=Tubb4a PE=1 SV=3	TAVCDIPPR	1027.51	1027.51	-0.0022	39.79
17	TBB4A_MOUSE	Tubulin beta-4A chain OS=Mus musculus GN=Tubb4a PE=1 SV=3	TAVCDIPPR	1027.51	1027.51	-0.0021	44.13
17	TBB4A_MOUSE	Tubulin beta-4A chain OS=Mus musculus GN=Tubb4a PE=1 SV=3	TAVCDIPPR	1027.51	1027.51	-0.0017	37.65
17	TBB4A_MOUSE	Tubulin beta-4A chain OS=Mus musculus GN=Tubb4a PE=1 SV=3	TAVCDIPPR	1027.51	1027.51	-0.0016	40.84
17	TBB4A_MOUSE	Tubulin beta-4A chain OS=Mus musculus GN=Tubb4a PE=1 SV=3	EIVHLQAGQCGNQIGAK	1821.91	1821.92	-0.0041	33.7
17	TBB4A_MOUSE	Tubulin beta-4A chain OS=Mus musculus GN=Tubb4a PE=1 SV=3	EIVHLQAGQCGNQIGAK	1821.91	1821.92	-0.003	66.11
17	TBB4A_MOUSE	Tubulin beta-4A chain OS=Mus musculus GN=Tubb4a PE=1 SV=3	EIVHLQAGQCGNQIGAK	1821.91	1821.92	-0.003	70.38
17	TBB4A_MOUSE	Tubulin beta-4A chain OS=Mus musculus GN=Tubb4a PE=1 SV=3	EIVHLQAGQCGNQIGAK	1821.91	1821.92	-0.0025	66
17	TBB4A_MOUSE	Tubulin beta-4A chain OS=Mus musculus GN=Tubb4a PE=1 SV=3	EIVHLQAGQCGNQIGAK	1821.91	1821.92	-0.0023	66.09
17	TBB4A_MOUSE	Tubulin beta-4A chain OS=Mus musculus GN=Tubb4a PE=1 SV=3	EIVHLQAGQCGNQIGAK	1821.92	1821.92	0.0007	22.53
17	TBB4A_MOUSE	Tubulin beta-4A chain OS=Mus musculus GN=Tubb4a PE=1 SV=3	LTTPTYGDLNHLVSATMSGVTTCLR	2707.32	2707.33	-0.0062	111.06
17	TBB4A_MOUSE	Tubulin beta-4A chain OS=Mus musculus GN=Tubb4a PE=1 SV=3	LTTPTYGDLNHLVSATMSGVTTCLR	2707.33	2707.33	-0.0035	63.27
17	TBB4A_MOUSE	Tubulin beta-4A chain OS=Mus musculus GN=Tubb4a PE=1 SV=3	LTTPTYGDLNHLVSATMSGVTTCLR	2707.33	2707.33	-0.0033	63.18
18	TBB5_MOUSE	Tubulin beta-4A chain OS=Mus musculus GN=Tubb4a PE=1 SV=3	LTTPTYGDLNHLVSATMSGVTTCLRFPGQLNADLR	3818.91	3818.91	0	43.02
18	TBB5_MOUSE	Tubulin beta-5 chain OS=Mus musculus GN=Tubb5 PE=1 SV=1	TAVCDIPPR	1027.51	1027.51	-0.0025	38.12
18	TBB5_MOUSE	Tubulin beta-5 chain OS=Mus musculus GN=Tubb5 PE=1 SV=1	TAVCDIPPR	1027.51	1027.51	-0.0023	37.56
18	TBB5_MOUSE	Tubulin beta-5 chain OS=Mus musculus GN=Tubb5 PE=1 SV=1	TAVCDIPPR	1027.51	1027.51	-0.0022	43.95
18	TBB5_MOUSE	Tubulin beta-5 chain OS=Mus musculus GN=Tubb5 PE=1 SV=1	TAVCDIPPR	1027.51	1027.51	-0.0022	44.01
18	TBB5_MOUSE	Tubulin beta-5 chain OS=Mus musculus GN=Tubb5 PE=1 SV=1	TAVCDIPPR	1027.51	1027.51	-0.0022	39.79
18	TBB5_MOUSE	Tubulin beta-5 chain OS=Mus musculus GN=Tubb5 PE=1 SV=1	TAVCDIPPR	1027.51	1027.51	-0.0021	44.13
18	TBB5_MOUSE	Tubulin beta-5 chain OS=Mus musculus GN=Tubb5 PE=1 SV=1	TAVCDIPPR	1027.51	1027.51	-0.0017	37.65
18	TBB5_MOUSE	Tubulin beta-5 chain OS=Mus musculus GN=Tubb5 PE=1 SV=1	TAVCDIPPR	1027.51	1027.51	-0.0016	40.84
18	TBB5_MOUSE	Tubulin beta-5 chain OS=Mus musculus GN=Tubb5 PE=1 SV=1	EIVHIQAGQCGNQIGAK	1821.91	1821.92	-0.0041	33.7
18	TBB5_MOUSE	Tubulin beta-5 chain OS=Mus musculus GN=Tubb5 PE=1 SV=1	EIVHIQAGQCGNQIGAK	1821.91	1821.92	-0.003	66.11
18	TBB5_MOUSE	Tubulin beta-5 chain OS=Mus musculus GN=Tubb5 PE=1 SV=1	EIVHIQAGQCGNQIGAK	1821.91	1821.92	-0.003	70.38
18	TBB5_MOUSE	Tubulin beta-5 chain OS=Mus musculus GN=Tubb5 PE=1 SV=1	EIVHIQAGQCGNQIGAK	1821.91	1821.92	-0.0025	66
18	TBB5_MOUSE	Tubulin beta-5 chain OS=Mus musculus GN=Tubb5 PE=1 SV=1	EIVHIQAGQCGNQIGAK	1821.91	1821.92	-0.0023	66.09
18	TBB5_MOUSE	Tubulin beta-5 chain OS=Mus musculus GN=Tubb5 PE=1 SV=1	EIVHIQAGQCGNQIGAK	1821.92	1821.92	0.0007	22.53
18	TBB5_MOUSE	Tubulin beta-5 chain OS=Mus musculus GN=Tubb5 PE=1 SV=1	LTTPTYGDLNHLVSATMSGVTTCLR	2707.32	2707.33	-0.0062	111.06
18	TBB5_MOUSE	Tubulin beta-5 chain OS=Mus musculus GN=Tubb5 PE=1 SV=1	LTTPTYGDLNHLVSATMSGVTTCLR	2707.33	2707.33	-0.0035	63.27
18	TBB5_MOUSE	Tubulin beta-5 chain OS=Mus musculus GN=Tubb5 PE=1 SV=1	LTTPTYGDLNHLVSATMSGVTTCLR	2707.33	2707.33	-0.0033	63.18
19	H32_MOUSE	Tubulin beta-5 chain OS=Mus musculus GN=Tubb5 PE=1 SV=1	LTTPTYGDLNHLVSATMSGVTTCLRFPGQLNADLR	3818.91	3818.91	0	43.02
19	H32_MOUSE	Histone H3.2 OS=Mus musculus GN=Hist1h3b PE=1 SV=2	FQSSAVMALQEASEAYLVGLFEDTNLCAIHAK	3512.69	3512.7	-0.0067	102.76
19	H32_MOUSE	Histone H3.2 OS=Mus musculus GN=Hist1h3b PE=1 SV=2	FQSSAVMALQEASEAYLVGLFEDTNLCAIHAK	3512.69	3512.7	-0.0058	53.33
19	H32_MOUSE	Histone H3.2 OS=Mus musculus GN=Hist1h3b PE=1 SV=2	FQSSAVMALQEASEAYLVGLFEDTNLCAIHAK	3512.69	3512.7	-0.0049	72.46
19	H32_MOUSE	Histone H3.2 OS=Mus musculus GN=Hist1h3b PE=1 SV=2	FQSSAVMALQEASEAYLVGLFEDTNLCAIHAK	3512.69	3512.7	-0.0034	90.61
19	H32_MOUSE	Histone H3.2 OS=Mus musculus GN=Hist1h3b PE=1 SV=2	FQSSAVMALQEASEAYLVGLFEDTNLCAIHAK	3512.69	3512.7	-0.0023	60.64
19	H32_MOUSE	Histone H3.2 OS=Mus musculus GN=Hist1h3b PE=1 SV=2	FQSSAVMALQEASEAYLVGLFEDTNLCAIHAK	3528.69	3528.69	-0.0044	113.13
19	H32_MOUSE	Histone H3.2 OS=Mus musculus GN=Hist1h3b PE=1 SV=2	FQSSAVMALQEASEAYLVGLFEDTNLCAIHAK	3528.69	3528.69	-0.0041	112.38
19	H32_MOUSE	Histone H3.2 OS=Mus musculus GN=Hist1h3b PE=1 SV=2	FQSSAVMALQEASEAYLVGLFEDTNLCAIHAK	3528.69	3528.69	-0.0031	61.29
19	H32_MOUSE	Histone H3.2 OS=Mus musculus GN=Hist1h3b PE=1 SV=2	FQSSAVMALQEASEAYLVGLFEDTNLCAIHAK	3528.69	3528.69	-0.0025	75.8
19	H32_MOUSE	Histone H3.2 OS=Mus musculus GN=Hist1h3b PE=1 SV=2	FQSSAVMALQEASEAYLVGLFEDTNLCAIHAK	3528.69	3528.69	-0.0022	22.21
20	SC23B_MOUSE	Histone H3.2 OS=Mus musculus GN=Hist1h3b PE=1 SV=2	FQSSAVMALQEASEAYLVGLFEDTNLCAIHAK	3528.69	3528.69	-0.0018	81.11
20	SC23B_MOUSE	Protein transport protein Sec23B OS=Mus musculus GN=Sec23b PE=1 SV=1	LCQKFGQYNK	1284.63	1284.63	-0.0022	29.46
20	SC23B_MOUSE	Protein transport protein Sec23B OS=Mus musculus GN=Sec23b PE=1 SV=1	IAGAIGPCVSLNVK	1397.77	1397.77	-0.0024	58.71
20	SC23B_MOUSE	Protein transport protein Sec23B OS=Mus musculus GN=Sec23b PE=1 SV=1	IAGAIGPCVSLNVK	1397.77	1397.77	-0.0018	28.52
20	SC23B_MOUSE	Protein transport protein Sec23B OS=Mus musculus GN=Sec23b PE=1 SV=1	LWACNFCFQR	1400.61	1400.61	-0.0017	45.54
20	SC23B_MOUSE	Protein transport protein Sec23B OS=Mus musculus GN=Sec23b PE=1 SV=1	LWACNFCFQR	1400.61	1400.61	-0.0015	49.84
20	SC23B_MOUSE	Protein transport protein Sec23B OS=Mus musculus GN=Sec23b PE=1 SV=1	MVVPLACLLTPLK	1453.84	1453.84	-0.002	74.81
20	SC23B_MOUSE	Protein transport protein Sec23B OS=Mus musculus GN=Sec23b PE=1 SV=1	MVVPLACLLTPLK	1453.84	1453.84	-0.0018	73.28
20	SC23B_MOUSE	Protein transport protein Sec23B OS=Mus musculus GN=Sec23b PE=1 SV=1	AILNPLCQVDYR	1460.74	1460.74	-0.0022	56.6
20	SC23B_MOUSE	Protein transport protein Sec23B OS=Mus musculus GN=Sec23b PE=1 SV=1	MVVPLACLLTPLK	1469.83	1469.84	-0.0013	47.59
20	SC23B_MOUSE	Protein transport protein Sec23B OS=Mus musculus GN=Sec23b PE=1 SV=1	MVVPLACLLTPLK	1469.83	1469.84	-0.0008	28.48
20	SC23B_MOUSE	Protein transport protein Sec23B OS=Mus musculus GN=Sec23b PE=1 SV=1	GPCVSENELGVGGTSQWK	1903.87	1903.87	-0.0042	103.28
20	SC23B_MOUSE	Protein transport protein Sec23B OS=Mus musculus GN=Sec23b PE=1 SV=1	SPLIFLYVVDTCLEEDDLQALK	2580.3	2580.3	-0.0068	82.81
20	SC23B_MOUSE	Protein transport protein Sec23B OS=Mus musculus GN=Sec23b PE=1 SV=1	SPLIFLYVVDTCLEEDDLQALK	2580.3	2580.3	-0.003	59.75
20	SC23B_MOUSE	Protein transport protein Sec23B OS=Mus musculus GN=Sec23b PE=1 SV=1	ICGLDPSSTLGIYFEVVNQHNAPVPQGGR	3124.53	3124.54	-0.0051	71.69
21	COPA_MOUSE	Protein transport protein Sec23B OS=Mus musculus GN=Sec23b PE=1 SV=1	ICGLDPSSTLGIYFEVVNQHNAPVPQGGR	3124.54	3124.54	-0.0029	41.24
21	COPA_MOUSE	Coatomer subunit alpha OS=Mus musculus GN=Copa PE=1 SV=2	HAIVICNR	981.516	981.518	-0.0018	25.04
21	COPA_MOUSE	Coatomer subunit alpha OS=Mus musculus GN=Copa PE=1 SV=2	AWEVDTCR	1035.44	1035.44	-0.002	22.81
21	COPA_MOUSE	Coatomer subunit alpha OS=Mus musculus GN=Copa PE=1 SV=2	GNNVYCLDR	1109.49	1109.49	-0.0013	34.07
21	COPA_MOUSE	Coatomer subunit alpha OS=Mus musculus GN=Copa PE=1 SV=2	GNNVYCLDR	1109.49	1109.49	-0.0003	46.05
21	COPA_MOUSE	Coatomer subunit alpha OS=Mus musculus GN=Copa PE=1 SV=2	LDALCNIHENIR	1466.73	1466.73	-0.0027	20.39
21	COPA_MOUSE	Coatomer subunit alpha OS=Mus musculus GN=Copa PE=1 SV=2	LDALCNIHENIR	1466.73	1466.73	-0.0025	21.27
21	COPA_MOUSE	Coatomer subunit alpha OS=Mus musculus GN=Copa PE=1 SV=2	LDALCNIHENIR	1466.73	1466.73	-0.0021	33.88
21	COPA_MOUSE	Coatomer subunit alpha OS=Mus musculus GN=Copa PE=1 SV=2	LDALCNIHENIR	1466.73	1466.73	-0.0017	57.25
21	COPA_MOUSE	Coatomer subunit alpha OS=Mus musculus GN=Copa PE=1 SV=2	KLDALCNIHENIR	1594.82	1594.82	-0.0029	25.46
21	COPA_MOUSE	Coatomer subunit alpha OS=Mus musculus GN=Copa PE=1 SV=2	CLFTLLGHLDYIR	1619.85	1619.85	-0.0032	27.41
21	COPA_MOUSE	Coatomer subunit alpha OS=Mus musculus GN=Copa PE=1 SV=2	CLFTLLGHLDYIR	1619.85	1619.85	-0.003	34.98
21	COPA_MOUSE	Coatomer subunit alpha OS=Mus musculus GN=Copa PE=1 SV=2	GHYNNVSCAVFHPR	1656.75	1656.76	-0.0038	48.33
21	COPA_MOUSE	Coatomer subunit alpha OS=Mus musculus GN=Copa PE=1 SV=2	GHYNNVSCAVFHPR	1656.76	1656.76	-0.0028	57.8
21	COPA_MOUSE	Coatomer subunit alpha OS=Mus musculus GN=Copa PE=1 SV=2	GHYNNVSCAVFHPR	1656.76	1656.76	-0.0025	47.69
21	COPA_MOUSE	Coatomer subunit alpha OS=Mus musculus GN=Copa PE=1 SV=2	GNNVYCLDRECRPR	1807.82	1807.82	-0.0022	20.1
21	COPA_MOUSE	Coatomer subunit alpha OS=Mus musculus GN=Copa PE=1 SV=2	TTYQALPCLPSMYSYPNR	2160.99	2161	-0.004	46.21
21	COPA_MOUSE	Coatomer subunit alpha OS=Mus musculus GN=Copa PE=1 SV=2	IQVPNCDEIFYAGTGNLLLR	2292.15	2292.16	-0.0043	97.64
21	COPA_MOUSE	Coatomer subunit alpha OS=Mus musculus GN=Copa PE=1 SV=2	IQVPNCDEIFYAGTGNLLLR	2292.15	2292.16	-0.0038	49.45
21	COPA_MOUSE	Coatomer subunit alpha OS=Mus musculus GN=Copa PE=1 SV=2	IQVPNCDEIFYAGTGNLLLR	2292.15	2292.16	-0.0033	58.34
21	COPA_MOUSE	Coatomer subunit alpha OS=Mus musculus GN=Copa PE=1 SV=2	IQVPNCDEIFYAGTGNLLLR	2292.15	2292.16	-0.0031	86.8
22	GFPT1_MOUSE	Coatomer subunit alpha OS=Mus musculus GN=Copa PE=1 SV=2	FPVFNMSYNPAENAVLLCTR	2342.12	2342.12	-0.0027	114.5
22	GFPT1_MOUSE	Glutamine--fructose-6-phosphate aminotransferase [isomerizing] 1 OS=Mus musculus GN=Gfpt1 PE=1 SV=3	CQNALQQVVAR	1285.65	1285.66	-0.0028	72.57
22	GFPT1_MOUSE	Glutamine--fructose-6-phosphate aminotransferase [isomerizing] 1 OS=Mus musculus GN=Gfpt1 PE=1 SV=3	CQNALQQVVAR	1285.65	1285.66	-0.0023	74.15
22	GFPT1_MOUSE	Glutamine--fructose-6-phosphate aminotransferase [isomerizing] 1 OS=Mus musculus GN=Gfpt1 PE=1 SV=3	GYHYATCLEGALK	1481.69	1481.7	-0.0025	32.61
22	GFPT1_MOUSE	Glutamine--fructose-6-phosphate aminotransferase [isomerizing] 1 OS=Mus musculus GN=Gfpt1 PE=1 SV=3	GYHYATCLEGALK	1481.7	1481.7	-0.0022	25.12
22	GFPT1_MOUSE	Glutamine--fructose-6-phosphate aminotransferase [isomerizing] 1 OS=Mus musculus GN=Gfpt1 PE=1 SV=3	GYHYATCLEGALK	1481.7	1481.7	-0.0019	61.64
22	GFPT1_MOUSE	Glutamine--fructose-6-phosphate aminotransferase [isomerizing] 1 OS=Mus musculus GN=Gfpt1 PE=1 SV=3	CGIFAYLNYHVPR	1608.78	1608.79	-0.0031	50.45
22	GFPT1_MOUSE	Glutamine--fructose-6-phosphate aminotransferase [isomerizing] 1 OS=Mus musculus GN=Gfpt1 PE=1 SV=3	CGIFAYLNYHVPR	1608.78	1608.79	-0.0031	47.68
22	GFPT1_MOUSE	Glutamine--fructose-6-phosphate aminotransferase [isomerizing] 1 OS=Mus musculus GN=Gfpt1 PE=1 SV=3	CGIFAYLNYHVPR	1608.78	1608.79	-0.0028	60.08
22	GFPT1_MOUSE	Glutamine--fructose-6-phosphate aminotransferase [isomerizing] 1 OS=Mus musculus GN=Gfpt1 PE=1 SV=3	CGIFAYLNYHVPR	1608.78	1608.79	-0.0027	60.04
22	GFPT1_MOUSE	Glutamine--fructose-6-phosphate aminotransferase [isomerizing] 1 OS=Mus musculus GN=Gfpt1 PE=1 SV=3	PVVICDKEDTETIK	1645.82	1645.82	-0.004	41.24
22	GFPT1_MOUSE	Glutamine--fructose-6-phosphate aminotransferase [isomerizing] 1 OS=Mus musculus GN=Gfpt1 PE=1 SV=3	PVVICDKEDTETIK	1645.82	1645.82	-0.0033	33.93
22	GFPT1_MOUSE	Glutamine--fructose-6-phosphate aminotransferase [isomerizing] 1 OS=Mus musculus GN=Gfpt1 PE=1 SV=3	PVVICDKEDTETIK	1645.82	1645.82	-0.0031	79.03
22	GFPT1_MOUSE	Glutamine--fructose-6-phosphate aminotransferase [isomerizing] 1 OS=Mus musculus GN=Gfpt1 PE=1 SV=3	QGRPVVICDKEDTETIK	1987	1987	-0.0038	40.18
22	GFPT1_MOUSE	Glutamine--fructose-6-phosphate aminotransferase [isomerizing] 1 OS=Mus musculus GN=Gfpt1 PE=1 SV=3	QGRPVVICDKEDTETIK	1987	1987	-0.0033	45.06
22	GFPT1_MOUSE	Glutamine--fructose-6-phosphate aminotransferase [isomerizing] 1 OS=Mus musculus GN=Gfpt1 PE=1 SV=3	DHTYAKCQNALQQVVAR	2000.98	2000.98	-0.003	36.3
22	GFPT1_MOUSE	Glutamine--fructose-6-phosphate aminotransferase [isomerizing] 1 OS=Mus musculus GN=Gfpt1 PE=1 SV=3	ETDCGVHINAGPEIGVASTK	2053.97	2053.97	-0.0039	32.17
22	GFPT1_MOUSE	Glutamine--fructose-6-phosphate aminotransferase [isomerizing] 1 OS=Mus musculus GN=Gfpt1 PE=1 SV=3	ETDCGVHINAGPEIGVASTK	2053.97	2053.97	-0.0028	75.17
23	AT2A3_MOUSE	Glutamine--fructose-6-phosphate aminotransferase [isomerizing] 1 OS=Mus musculus GN=Gfpt1 PE=1 SV=3	ETDCGVHINAGPEIGVASTK	2053.97	2053.97	-0.0022	29.03
23	AT2A3_MOUSE	Sarcoplasmic/endoplasmic reticulum calcium ATPase 3 OS=Mus musculus GN=Atp2a3 PE=2 SV=3	CLALATR	803.431	803.432	-0.0016	44.29
23	AT2A3_MOUSE	Sarcoplasmic/endoplasmic reticulum calcium ATPase 3 OS=Mus musculus GN=Atp2a3 PE=2 SV=3	CLALATR	803.431	803.432	-0.0014	44.45
23	AT2A3_MOUSE	Sarcoplasmic/endoplasmic reticulum calcium ATPase 3 OS=Mus musculus GN=Atp2a3 PE=2 SV=3	CLALATR	803.431	803.432	-0.0013	29.27
23	AT2A3_MOUSE	Sarcoplasmic/endoplasmic reticulum calcium ATPase 3 OS=Mus musculus GN=Atp2a3 PE=2 SV=3	CLALATR	803.431	803.432	-0.0013	38.64
23	AT2A3_MOUSE	Sarcoplasmic/endoplasmic reticulum calcium ATPase 3 OS=Mus musculus GN=Atp2a3 PE=2 SV=3	GTAVAICR	846.437	846.438	-0.0013	21.64
23	AT2A3_MOUSE	Sarcoplasmic/endoplasmic reticulum calcium ATPase 3 OS=Mus musculus GN=Atp2a3 PE=2 SV=3	GTAVAICR	846.437	846.438	-0.0011	44.81
23	AT2A3_MOUSE	Sarcoplasmic/endoplasmic reticulum calcium ATPase 3 OS=Mus musculus GN=Atp2a3 PE=2 SV=3	GTAVAICR	846.437	846.438	-0.0009	46.24
23	AT2A3_MOUSE	Sarcoplasmic/endoplasmic reticulum calcium ATPase 3 OS=Mus musculus GN=Atp2a3 PE=2 SV=3	GTAVAICRR	1002.54	1002.54	-0.0016	25.84
23	AT2A3_MOUSE	Sarcoplasmic/endoplasmic reticulum calcium ATPase 3 OS=Mus musculus GN=Atp2a3 PE=2 SV=3	TGTLTTNQMSVCR	1483.67	1483.68	-0.0019	48.33
23	AT2A3_MOUSE	Sarcoplasmic/endoplasmic reticulum calcium ATPase 3 OS=Mus musculus GN=Atp2a3 PE=2 SV=3	VGEATETALTCLVEK	1619.81	1619.81	-0.0024	84.7
23	AT2A3_MOUSE	Sarcoplasmic/endoplasmic reticulum calcium ATPase 3 OS=Mus musculus GN=Atp2a3 PE=2 SV=3	VGEATETALTCLVEK	1619.81	1619.81	-0.0022	95.13
23	AT2A3_MOUSE	Sarcoplasmic/endoplasmic reticulum calcium ATPase 3 OS=Mus musculus GN=Atp2a3 PE=2 SV=3	SLPSVETLGCTSVICSDK	1951.92	1951.92	-0.0042	62.02
23	AT2A3_MOUSE	Sarcoplasmic/endoplasmic reticulum calcium ATPase 3 OS=Mus musculus GN=Atp2a3 PE=2 SV=3	SLPSVETLGCTSVICSDK	1951.92	1951.92	-0.0036	83.11
23	AT2A3_MOUSE	Sarcoplasmic/endoplasmic reticulum calcium ATPase 3 OS=Mus musculus GN=Atp2a3 PE=2 SV=3	CGQFDGLVELATICALCNDSALDYNEAK	3146.4	3146.4	-0.0043	67.69
23	AT2A3_MOUSE	Sarcoplasmic/endoplasmic reticulum calcium ATPase 3 OS=Mus musculus GN=Atp2a3 PE=2 SV=3	QGEQPVRCGQFDGLVELATICALCNDSALDYNEAK	3940.78	3940.8	-0.0198	86.58
24	RINI_MOUSE	Sarcoplasmic/endoplasmic reticulum calcium ATPase 3 OS=Mus musculus GN=Atp2a3 PE=2 SV=3	QGEQPVRCGQFDGLVELATICALCNDSALDYNEAK	3940.79	3940.8	-0.0168	39.88
24	RINI_MOUSE	Ribonuclease inhibitor OS=Mus musculus GN=Rnh1 PE=1 SV=1	ILCQGLK	830.467	830.468	-0.0013	32.76
24	RINI_MOUSE	Ribonuclease inhibitor OS=Mus musculus GN=Rnh1 PE=1 SV=1	ILCQGLK	830.467	830.468	-0.0012	23.63
24	RINI_MOUSE	Ribonuclease inhibitor OS=Mus musculus GN=Rnh1 PE=1 SV=1	DSACQLESLK	1149.53	1149.53	-0.0027	54.37
24	RINI_MOUSE	Ribonuclease inhibitor OS=Mus musculus GN=Rnh1 PE=1 SV=1	DSACQLESLK	1149.53	1149.53	-0.0019	37.64
24	RINI_MOUSE	Ribonuclease inhibitor OS=Mus musculus GN=Rnh1 PE=1 SV=1	LDDCGLTEVR	1176.54	1176.54	-0.0023	50.47
24	RINI_MOUSE	Ribonuclease inhibitor OS=Mus musculus GN=Rnh1 PE=1 SV=1	LLCEGLQDPQCR	1487.68	1487.69	-0.0024	24.31
24	RINI_MOUSE	Ribonuclease inhibitor OS=Mus musculus GN=Rnh1 PE=1 SV=1	LGNAGIAALCPGLLLPSCK	1924.03	1924.03	-0.0019	89.9
24	RINI_MOUSE	Ribonuclease inhibitor OS=Mus musculus GN=Rnh1 PE=1 SV=1	LGNAGIAALCPGLLLPSCK	1924.03	1924.03	-0.0005	56.09
24	RINI_MOUSE	Ribonuclease inhibitor OS=Mus musculus GN=Rnh1 PE=1 SV=1	TCSLTAASCPYFCSVLTK	2064.93	2064.93	-0.0058	84.13
24	RINI_MOUSE	Ribonuclease inhibitor OS=Mus musculus GN=Rnh1 PE=1 SV=1	TCSLTAASCPYFCSVLTK	2064.93	2064.93	-0.0036	79.9
24	RINI_MOUSE	Ribonuclease inhibitor OS=Mus musculus GN=Rnh1 PE=1 SV=1	TNELGDGGVGLVLQGLQNPTCK	2269.13	2269.14	-0.0036	75.33
24	RINI_MOUSE	Ribonuclease inhibitor OS=Mus musculus GN=Rnh1 PE=1 SV=1	LLCESLLEPGCQLESLWIK	2287.15	2287.16	-0.0053	36.02
24	RINI_MOUSE	Ribonuclease inhibitor OS=Mus musculus GN=Rnh1 PE=1 SV=1	LENCGITAANCKDLCDVVASK	2337.07	2337.08	-0.0038	35.35
24	RINI_MOUSE	Ribonuclease inhibitor OS=Mus musculus GN=Rnh1 PE=1 SV=1	TLWLWECDITAEGCKDLCR	2425.08	2425.09	-0.0073	46.04
24	RINI_MOUSE	Ribonuclease inhibitor OS=Mus musculus GN=Rnh1 PE=1 SV=1	TLWLWECDITAEGCKDLCR	2425.08	2425.09	-0.0029	27.51
24	RINI_MOUSE	Ribonuclease inhibitor OS=Mus musculus GN=Rnh1 PE=1 SV=1	QPSCTLQQLVLYDIYWTNEVEEQLR	3124.51	3124.52	-0.0115	44.43
25	ERO1B_MOUSE	Ribonuclease inhibitor OS=Mus musculus GN=Rnh1 PE=1 SV=1	QPSCTLQQLVLYDIYWTNEVEEQLR	3124.51	3124.52	-0.0031	53.7
25	ERO1B_MOUSE	ERO1-like protein beta OS=Mus musculus GN=Ero1lb PE=1 SV=1	ELDDCEQANK	1220.5	1220.5	-0.0015	36.62
25	ERO1B_MOUSE	ERO1-like protein beta OS=Mus musculus GN=Ero1lb PE=1 SV=1	VWNSIYEENCFKPR	1840.85	1840.86	-0.0039	64.48
25	ERO1B_MOUSE	ERO1-like protein beta OS=Mus musculus GN=Ero1lb PE=1 SV=1	VWNSIYEENCFKPR	1840.85	1840.86	-0.0033	35.99
25	ERO1B_MOUSE	ERO1-like protein beta OS=Mus musculus GN=Ero1lb PE=1 SV=1	VWNSIYEENCFKPR	1840.85	1840.86	-0.003	78.82
25	ERO1B_MOUSE	ERO1-like protein beta OS=Mus musculus GN=Ero1lb PE=1 SV=1	VWNSIYEENCFKPR	1840.85	1840.86	-0.0029	39.34
25	ERO1B_MOUSE	ERO1-like protein beta OS=Mus musculus GN=Ero1lb PE=1 SV=1	YDDSQDHFCELDDER	1942.72	1942.73	-0.0049	35.69
25	ERO1B_MOUSE	ERO1-like protein beta OS=Mus musculus GN=Ero1lb PE=1 SV=1	YDDSQDHFCELDDER	1942.72	1942.73	-0.0046	83.59
25	ERO1B_MOUSE	ERO1-like protein beta OS=Mus musculus GN=Ero1lb PE=1 SV=1	YDDSQDHFCELDDER	1942.72	1942.73	-0.0029	37.54
25	ERO1B_MOUSE	ERO1-like protein beta OS=Mus musculus GN=Ero1lb PE=1 SV=1	YDDSQDHFCELDDER	1942.72	1942.73	-0.0029	79.29
25	ERO1B_MOUSE	ERO1-like protein beta OS=Mus musculus GN=Ero1lb PE=1 SV=1	GEDDGESFYTWLEGLCLEK	2246.96	2246.97	-0.0041	68.24
25	ERO1B_MOUSE	ERO1-like protein beta OS=Mus musculus GN=Ero1lb PE=1 SV=1	GEDDGESFYTWLEGLCLEK	2246.96	2246.97	-0.0039	38.67
25	ERO1B_MOUSE	ERO1-like protein beta OS=Mus musculus GN=Ero1lb PE=1 SV=1	GEDDGESFYTWLEGLCLEK	2246.96	2246.97	-0.0033	80.44
25	ERO1B_MOUSE	ERO1-like protein beta OS=Mus musculus GN=Ero1lb PE=1 SV=1	GEDDGESFYTWLEGLCLEK	2246.97	2246.97	-0.0019	58.16
26	NB5R3_MOUSE	ERO1-like protein beta OS=Mus musculus GN=Ero1lb PE=1 SV=1	GEDDGESFYTWLEGLCLEKR	2403.07	2403.07	-0.0008	27.97
26	NB5R3_MOUSE	NADH-cytochrome b5 reductase 3 OS=Mus musculus GN=Cyb5r3 PE=1 SV=3	DPNDHTVCYLLFANQSEK	2149.97	2149.97	-0.0048	67.97
26	NB5R3_MOUSE	NADH-cytochrome b5 reductase 3 OS=Mus musculus GN=Cyb5r3 PE=1 SV=3	DPNDHTVCYLLFANQSEK	2149.97	2149.97	-0.0042	38.89
26	NB5R3_MOUSE	NADH-cytochrome b5 reductase 3 OS=Mus musculus GN=Cyb5r3 PE=1 SV=3	DPNDHTVCYLLFANQSEK	2149.97	2149.97	-0.0035	84.03
26	NB5R3_MOUSE	NADH-cytochrome b5 reductase 3 OS=Mus musculus GN=Cyb5r3 PE=1 SV=3	DPNDHTVCYLLFANQSEK	2149.97	2149.97	-0.0033	46.13
26	NB5R3_MOUSE	NADH-cytochrome b5 reductase 3 OS=Mus musculus GN=Cyb5r3 PE=1 SV=3	AVLKDPNDHTVCYLLFANQSEK	2561.25	2561.26	-0.0046	29.88
26	NB5R3_MOUSE	NADH-cytochrome b5 reductase 3 OS=Mus musculus GN=Cyb5r3 PE=1 SV=3	AVLKDPNDHTVCYLLFANQSEK	2561.25	2561.26	-0.0042	64.76
26	NB5R3_MOUSE	NADH-cytochrome b5 reductase 3 OS=Mus musculus GN=Cyb5r3 PE=1 SV=3	AVLKDPNDHTVCYLLFANQSEK	2561.25	2561.26	-0.0039	83.69
26	NB5R3_MOUSE	NADH-cytochrome b5 reductase 3 OS=Mus musculus GN=Cyb5r3 PE=1 SV=3	DHLPTPGEEPLILMCGPPPMIQFACLPNLER	3541.72	3541.72	-0.0046	80.03
26	NB5R3_MOUSE	NADH-cytochrome b5 reductase 3 OS=Mus musculus GN=Cyb5r3 PE=1 SV=3	DHLPTPGEEPLILMCGPPPMIQFACLPNLER	3541.72	3541.72	-0.0042	81.78
26	NB5R3_MOUSE	NADH-cytochrome b5 reductase 3 OS=Mus musculus GN=Cyb5r3 PE=1 SV=3	DHLPTPGEEPLILMCGPPPMIQFACLPNLER	3541.72	3541.72	-0.0026	59.9
26	NB5R3_MOUSE	NADH-cytochrome b5 reductase 3 OS=Mus musculus GN=Cyb5r3 PE=1 SV=3	DHLPTPGEEPLILMCGPPPMIQFACLPNLER	3541.72	3541.72	-0.0023	54.78
27	GBLP_MOUSE	NADH-cytochrome b5 reductase 3 OS=Mus musculus GN=Cyb5r3 PE=1 SV=3	DHLPTPGEEPLILMCGPPPMIQFACLPNLER	3557.71	3557.72	-0.0071	62.07
27	GBLP_MOUSE	Guanine nucleotide-binding protein subunit beta-2-like 1 OS=Mus musculus GN=Gnb2l1 PE=1 SV=3	LWNTLGVCK	1089.56	1089.56	-0.002	46.02
27	GBLP_MOUSE	Guanine nucleotide-binding protein subunit beta-2-like 1 OS=Mus musculus GN=Gnb2l1 PE=1 SV=3	LWNTLGVCK	1089.56	1089.56	-0.0019	47.82
27	GBLP_MOUSE	Guanine nucleotide-binding protein subunit beta-2-like 1 OS=Mus musculus GN=Gnb2l1 PE=1 SV=3	LWNTLGVCK	1089.56	1089.56	-0.0012	34.55
27	GBLP_MOUSE	Guanine nucleotide-binding protein subunit beta-2-like 1 OS=Mus musculus GN=Gnb2l1 PE=1 SV=3	YWLCAATGPSIK	1365.67	1365.68	-0.0024	56.81
27	GBLP_MOUSE	Guanine nucleotide-binding protein subunit beta-2-like 1 OS=Mus musculus GN=Gnb2l1 PE=1 SV=3	YWLCAATGPSIK	1365.67	1365.68	-0.0015	51.95
27	GBLP_MOUSE	Guanine nucleotide-binding protein subunit beta-2-like 1 OS=Mus musculus GN=Gnb2l1 PE=1 SV=3	FSPNSSNPIIVSCGWDK	1906.89	1906.89	-0.0032	63.93
27	GBLP_MOUSE	Guanine nucleotide-binding protein subunit beta-2-like 1 OS=Mus musculus GN=Gnb2l1 PE=1 SV=3	FSPNSSNPIIVSCGWDK	1906.89	1906.89	-0.003	56.25
27	GBLP_MOUSE	Guanine nucleotide-binding protein subunit beta-2-like 1 OS=Mus musculus GN=Gnb2l1 PE=1 SV=3	YTVQDESHSEWVSCVR	1980.86	1980.86	-0.0036	22.34
27	GBLP_MOUSE	Guanine nucleotide-binding protein subunit beta-2-like 1 OS=Mus musculus GN=Gnb2l1 PE=1 SV=3	YTVQDESHSEWVSCVR	1980.86	1980.86	-0.0022	69.59
27	GBLP_MOUSE	Guanine nucleotide-binding protein subunit beta-2-like 1 OS=Mus musculus GN=Gnb2l1 PE=1 SV=3	HLYTLDGGDIINALCFSPNR	2275.1	2275.11	-0.0024	40.82
27	GBLP_MOUSE	Guanine nucleotide-binding protein subunit beta-2-like 1 OS=Mus musculus GN=Gnb2l1 PE=1 SV=3	TNHIGHTGYLNTVTVSPDGSLCASGGK	2742.3	2742.3	-0.0059	41.11
27	GBLP_MOUSE	Guanine nucleotide-binding protein subunit beta-2-like 1 OS=Mus musculus GN=Gnb2l1 PE=1 SV=3	TNHIGHTGYLNTVTVSPDGSLCASGGK	2742.3	2742.3	-0.0056	32.98
27	GBLP_MOUSE	Guanine nucleotide-binding protein subunit beta-2-like 1 OS=Mus musculus GN=Gnb2l1 PE=1 SV=3	TNHIGHTGYLNTVTVSPDGSLCASGGK	2742.3	2742.3	-0.0053	92.12
27	GBLP_MOUSE	Guanine nucleotide-binding protein subunit beta-2-like 1 OS=Mus musculus GN=Gnb2l1 PE=1 SV=3	TNHIGHTGYLNTVTVSPDGSLCASGGK	2742.3	2742.3	-0.0035	67.72
27	GBLP_MOUSE	Guanine nucleotide-binding protein subunit beta-2-like 1 OS=Mus musculus GN=Gnb2l1 PE=1 SV=3	AEPPQCTSLAWSADGQTLFAGYTDNLVR	3067.43	3067.43	-0.0044	51.29
28	SYNC_MOUSE	Guanine nucleotide-binding protein subunit beta-2-like 1 OS=Mus musculus GN=Gnb2l1 PE=1 SV=3	AEPPQCTSLAWSADGQTLFAGYTDNLVR	3067.43	3067.43	-0.002	75.88
28	SYNC_MOUSE	Asparagine--tRNA ligase, cytoplasmic OS=Mus musculus GN=Nars PE=1 SV=2	DVCLYPR	921.436	921.438	-0.002	33.44
28	SYNC_MOUSE	Asparagine--tRNA ligase, cytoplasmic OS=Mus musculus GN=Nars PE=1 SV=2	DVCLYPR	921.436	921.438	-0.0018	33.46
28	SYNC_MOUSE	Asparagine--tRNA ligase, cytoplasmic OS=Mus musculus GN=Nars PE=1 SV=2	DVCLYPR	921.437	921.438	-0.0012	38.19
28	SYNC_MOUSE	Asparagine--tRNA ligase, cytoplasmic OS=Mus musculus GN=Nars PE=1 SV=2	NDPSLPEPACVK	1325.63	1325.63	-0.0027	38.4
28	SYNC_MOUSE	Asparagine--tRNA ligase, cytoplasmic OS=Mus musculus GN=Nars PE=1 SV=2	NDPSLPEPACVK	1325.63	1325.63	-0.002	27.98
28	SYNC_MOUSE	Asparagine--tRNA ligase, cytoplasmic OS=Mus musculus GN=Nars PE=1 SV=2	LEDLVCDVVDR	1331.64	1331.64	-0.0028	45.99
28	SYNC_MOUSE	Asparagine--tRNA ligase, cytoplasmic OS=Mus musculus GN=Nars PE=1 SV=2	YHIRDVCLYPR	1490.74	1490.75	-0.0035	32.42
28	SYNC_MOUSE	Asparagine--tRNA ligase, cytoplasmic OS=Mus musculus GN=Nars PE=1 SV=2	YHIRDVCLYPR	1490.74	1490.75	-0.0026	31.61
28	SYNC_MOUSE	Asparagine--tRNA ligase, cytoplasmic OS=Mus musculus GN=Nars PE=1 SV=2	YGTCPHGGYGLGLER	1635.74	1635.75	-0.0043	49.64
28	SYNC_MOUSE	Asparagine--tRNA ligase, cytoplasmic OS=Mus musculus GN=Nars PE=1 SV=2	YGTCPHGGYGLGLER	1635.74	1635.75	-0.0035	57.27
28	SYNC_MOUSE	Asparagine--tRNA ligase, cytoplasmic OS=Mus musculus GN=Nars PE=1 SV=2	YGTCPHGGYGLGLER	1635.74	1635.75	-0.0035	54.6
28	SYNC_MOUSE	Asparagine--tRNA ligase, cytoplasmic OS=Mus musculus GN=Nars PE=1 SV=2	YGTCPHGGYGLGLER	1635.74	1635.75	-0.0032	56.65
28	SYNC_MOUSE	Asparagine--tRNA ligase, cytoplasmic OS=Mus musculus GN=Nars PE=1 SV=2	GYCEVTTPTLVQTQVEGGATLFK	2498.23	2498.24	-0.0076	40.48
28	SYNC_MOUSE	Asparagine--tRNA ligase, cytoplasmic OS=Mus musculus GN=Nars PE=1 SV=2	GYCEVTTPTLVQTQVEGGATLFK	2498.23	2498.24	-0.0058	84.36
28	SYNC_MOUSE	Asparagine--tRNA ligase, cytoplasmic OS=Mus musculus GN=Nars PE=1 SV=2	GYCEVTTPTLVQTQVEGGATLFK	2498.23	2498.24	-0.0028	107.16
29	VAT1L_MOUSE	Asparagine--tRNA ligase, cytoplasmic OS=Mus musculus GN=Nars PE=1 SV=2	HLAEFTHVEAECPFLTFEDLLNR	2787.33	2787.33	0	88.01
29	VAT1L_MOUSE	Synaptic vesicle membrane protein VAT-1 homolog-like OS=Mus musculus GN=Vat1l PE=2 SV=2	ACGLNFIDLMVR	1407.7	1407.7	-0.0021	55.06
29	VAT1L_MOUSE	Synaptic vesicle membrane protein VAT-1 homolog-like OS=Mus musculus GN=Vat1l PE=2 SV=2	ACGLNFIDLMVR	1407.7	1407.7	-0.0014	64.33
29	VAT1L_MOUSE	Synaptic vesicle membrane protein VAT-1 homolog-like OS=Mus musculus GN=Vat1l PE=2 SV=2	ISAEGVDIVLDCLCGDNTGK	2134.98	2134.99	-0.0042	87.22
29	VAT1L_MOUSE	Synaptic vesicle membrane protein VAT-1 homolog-like OS=Mus musculus GN=Vat1l PE=2 SV=2	ISAEGVDIVLDCLCGDNTGK	2134.99	2134.99	-0.0023	99.56
29	VAT1L_MOUSE	Synaptic vesicle membrane protein VAT-1 homolog-like OS=Mus musculus GN=Vat1l PE=2 SV=2	ISAEGVDIVLDCLCGDNTGK	2134.99	2134.99	-0.0021	69.58
29	VAT1L_MOUSE	Synaptic vesicle membrane protein VAT-1 homolog-like OS=Mus musculus GN=Vat1l PE=2 SV=2	ISAEGVDIVLDCLCGDNTGK	2134.99	2134.99	-0.0016	71.91
29	VAT1L_MOUSE	Synaptic vesicle membrane protein VAT-1 homolog-like OS=Mus musculus GN=Vat1l PE=2 SV=2	TPLVPGFECSGIVEALGDSVK	2174.09	2174.09	-0.0047	61.83
29	VAT1L_MOUSE	Synaptic vesicle membrane protein VAT-1 homolog-like OS=Mus musculus GN=Vat1l PE=2 SV=2	TPLVPGFECSGIVEALGDSVK	2174.09	2174.09	-0.0045	38.57
29	VAT1L_MOUSE	Synaptic vesicle membrane protein VAT-1 homolog-like OS=Mus musculus GN=Vat1l PE=2 SV=2	TPLVPGFECSGIVEALGDSVK	2174.09	2174.09	-0.0026	44.76
30	PAPS2_MOUSE	Synaptic vesicle membrane protein VAT-1 homolog-like OS=Mus musculus GN=Vat1l PE=2 SV=2	TPLVPGFECSGIVEALGDSVK	2174.09	2174.09	-0.0025	60.03
30	PAPS2_MOUSE	Bifunctional 3~-phosphoadenosine 5~-phosphosulfate synthase 2 OS=Mus musculus GN=Papss2 PE=1 SV=2	GCTVWLTGLSGAGK	1405.7	1405.7	-0.0019	68.72
30	PAPS2_MOUSE	Bifunctional 3~-phosphoadenosine 5~-phosphosulfate synthase 2 OS=Mus musculus GN=Papss2 PE=1 SV=2	GCTVWLTGLSGAGK	1405.7	1405.7	-0.0016	75.7
30	PAPS2_MOUSE	Bifunctional 3~-phosphoadenosine 5~-phosphosulfate synthase 2 OS=Mus musculus GN=Papss2 PE=1 SV=2	LFADAGLVCITSFISPFAK	2056.07	2056.07	-0.0036	89.43
30	PAPS2_MOUSE	Bifunctional 3~-phosphoadenosine 5~-phosphosulfate synthase 2 OS=Mus musculus GN=Papss2 PE=1 SV=2	LFADAGLVCITSFISPFAK	2056.07	2056.07	-0.0032	52.67
30	PAPS2_MOUSE	Bifunctional 3~-phosphoadenosine 5~-phosphosulfate synthase 2 OS=Mus musculus GN=Papss2 PE=1 SV=2	LFADAGLVCITSFISPFAK	2056.07	2056.07	-0.0012	45.15
30	PAPS2_MOUSE	Bifunctional 3~-phosphoadenosine 5~-phosphosulfate synthase 2 OS=Mus musculus GN=Papss2 PE=1 SV=2	LFADAGLVCITSFISPFAK	2056.07	2056.07	-0.0009	92.5
30	PAPS2_MOUSE	Bifunctional 3~-phosphoadenosine 5~-phosphosulfate synthase 2 OS=Mus musculus GN=Papss2 PE=1 SV=2	STIVAIFPSPMLYAGPTEVQWHCR	2759.35	2759.36	-0.0026	29.56
30	PAPS2_MOUSE	Bifunctional 3~-phosphoadenosine 5~-phosphosulfate synthase 2 OS=Mus musculus GN=Papss2 PE=1 SV=2	STIVAIFPSPMLYAGPTEVQWHCR	2759.36	2759.36	-0.0013	29.95
30	PAPS2_MOUSE	Bifunctional 3~-phosphoadenosine 5~-phosphosulfate synthase 2 OS=Mus musculus GN=Papss2 PE=1 SV=2	IHESAGLPFFEIFVDAPLNICESR	2760.35	2760.36	-0.0037	59.46
30	PAPS2_MOUSE	Bifunctional 3~-phosphoadenosine 5~-phosphosulfate synthase 2 OS=Mus musculus GN=Papss2 PE=1 SV=2	IHESAGLPFFEIFVDAPLNICESR	2760.36	2760.36	-0.0022	45.61
30	PAPS2_MOUSE	Bifunctional 3~-phosphoadenosine 5~-phosphosulfate synthase 2 OS=Mus musculus GN=Papss2 PE=1 SV=2	TTISFALEEYLVSHAIPCYSLDGDNVR	3069.47	3069.48	-0.0046	40.6
30	PAPS2_MOUSE	Bifunctional 3~-phosphoadenosine 5~-phosphosulfate synthase 2 OS=Mus musculus GN=Papss2 PE=1 SV=2	TTISFALEEYLVSHAIPCYSLDGDNVR	3069.47	3069.48	-0.0035	32.66
30	PAPS2_MOUSE	Bifunctional 3~-phosphoadenosine 5~-phosphosulfate synthase 2 OS=Mus musculus GN=Papss2 PE=1 SV=2	TNLSSVSDCVQQVVELLQEQNIVPHTTIK	3278.68	3278.68	-0.0047	32.59
30	PAPS2_MOUSE	Bifunctional 3~-phosphoadenosine 5~-phosphosulfate synthase 2 OS=Mus musculus GN=Papss2 PE=1 SV=2	TNLSSVSDCVQQVVELLQEQNIVPHTTIK	3278.68	3278.68	-0.0031	39.24
31	1433G_MOUSE	Bifunctional 3~-phosphoadenosine 5~-phosphosulfate synthase 2 OS=Mus musculus GN=Papss2 PE=1 SV=2	TNLSSVSDCVQQVVELLQEQNIVPHTTIK	3278.68	3278.68	-0.0015	35.38
31	1433G_MOUSE	14-3-3 protein gamma OS=Mus musculus GN=Ywhag PE=1 SV=2	NCSETQYESK	1244.5	1244.5	-0.0022	31.1
31	1433G_MOUSE	14-3-3 protein gamma OS=Mus musculus GN=Ywhag PE=1 SV=2	NCSETQYESK	1244.5	1244.5	-0.0017	35.81
31	1433G_MOUSE	14-3-3 protein gamma OS=Mus musculus GN=Ywhag PE=1 SV=2	ELEAVCQDVLSLLDNYLIK	2234.15	2234.15	-0.0036	79.19
31	1433G_MOUSE	14-3-3 protein gamma OS=Mus musculus GN=Ywhag PE=1 SV=2	ELEAVCQDVLSLLDNYLIK	2234.15	2234.15	-0.0032	64.5
31	1433G_MOUSE	14-3-3 protein gamma OS=Mus musculus GN=Ywhag PE=1 SV=2	ELEAVCQDVLSLLDNYLIK	2234.15	2234.15	-0.0032	37.23
31	1433G_MOUSE	14-3-3 protein gamma OS=Mus musculus GN=Ywhag PE=1 SV=2	ELEAVCQDVLSLLDNYLIK	2234.15	2234.15	-0.0031	76.78
31	1433G_MOUSE	14-3-3 protein gamma OS=Mus musculus GN=Ywhag PE=1 SV=2	LGLALNYSVFYYEIQNAPEQACHLAK	3011.48	3011.49	-0.0056	49.25
31	1433G_MOUSE	14-3-3 protein gamma OS=Mus musculus GN=Ywhag PE=1 SV=2	LGLALNYSVFYYEIQNAPEQACHLAK	3011.48	3011.49	-0.004	87.67
31	1433G_MOUSE	14-3-3 protein gamma OS=Mus musculus GN=Ywhag PE=1 SV=2	LGLALNYSVFYYEIQNAPEQACHLAK	3011.48	3011.49	-0.0033	85
31	1433G_MOUSE	14-3-3 protein gamma OS=Mus musculus GN=Ywhag PE=1 SV=2	LGLALNYSVFYYEIQNAPEQACHLAK	3011.48	3011.49	-0.0022	37.51
32	IMB1_MOUSE	14-3-3 protein gamma OS=Mus musculus GN=Ywhag PE=1 SV=2	ELEAVCQDVLSLLDNYLIKNCSETQYESK	3460.63	3460.64	-0.0058	81.22
32	IMB1_MOUSE	Importin subunit beta-1 OS=Mus musculus GN=Kpnb1 PE=1 SV=2	ESCLEAYTGIVQGLK	1666.82	1666.82	-0.0027	56.59
32	IMB1_MOUSE	Importin subunit beta-1 OS=Mus musculus GN=Kpnb1 PE=1 SV=2	ESCLEAYTGIVQGLK	1666.82	1666.82	-0.0019	59.48
32	IMB1_MOUSE	Importin subunit beta-1 OS=Mus musculus GN=Kpnb1 PE=1 SV=2	IQFNDLQSLLCATLQNVLR	2245.18	2245.19	-0.0079	85.87
32	IMB1_MOUSE	Importin subunit beta-1 OS=Mus musculus GN=Kpnb1 PE=1 SV=2	IQFNDLQSLLCATLQNVLR	2245.18	2245.19	-0.0048	61.5
32	IMB1_MOUSE	Importin subunit beta-1 OS=Mus musculus GN=Kpnb1 PE=1 SV=2	IQFNDLQSLLCATLQNVLR	2245.18	2245.19	-0.004	98.17
32	IMB1_MOUSE	Importin subunit beta-1 OS=Mus musculus GN=Kpnb1 PE=1 SV=2	IQFNDLQSLLCATLQNVLR	2245.19	2245.19	-0.0033	58.85
32	IMB1_MOUSE	Importin subunit beta-1 OS=Mus musculus GN=Kpnb1 PE=1 SV=2	ESTLEAIGYICQDIDPEQLQDK	2564.19	2564.2	-0.0034	58.48
32	IMB1_MOUSE	Importin subunit beta-1 OS=Mus musculus GN=Kpnb1 PE=1 SV=2	SDFDMVDYLNELRESCLEAYTGIVQGLK	3264.53	3264.53	-0.0066	40.23
32	IMB1_MOUSE	Importin subunit beta-1 OS=Mus musculus GN=Kpnb1 PE=1 SV=2	SDFDMVDYLNELRESCLEAYTGIVQGLK	3264.53	3264.53	0	75.44
32	IMB1_MOUSE	Importin subunit beta-1 OS=Mus musculus GN=Kpnb1 PE=1 SV=2	ALQSNILPFCDEVMQLLLENLGNENVHR	3265.62	3265.62	-0.0043	42.9
33	RLA1_MOUSE	Importin subunit beta-1 OS=Mus musculus GN=Kpnb1 PE=1 SV=2	ALQSNILPFCDEVMQLLLENLGNENVHR	3265.63	3265.62	0.0042	39.04
33	RLA1_MOUSE	60S acidic ribosomal protein P1 OS=Mus musculus GN=Rplp1 PE=2 SV=1	ASVSELACIYSALILHDDEVTVTEDK	2919.4	2919.41	-0.0094	34.26
33	RLA1_MOUSE	60S acidic ribosomal protein P1 OS=Mus musculus GN=Rplp1 PE=2 SV=1	ASVSELACIYSALILHDDEVTVTEDK	2919.4	2919.41	-0.0066	90.53
33	RLA1_MOUSE	60S acidic ribosomal protein P1 OS=Mus musculus GN=Rplp1 PE=2 SV=1	ASVSELACIYSALILHDDEVTVTEDK	2919.4	2919.41	-0.0062	78.35
33	RLA1_MOUSE	60S acidic ribosomal protein P1 OS=Mus musculus GN=Rplp1 PE=2 SV=1	ASVSELACIYSALILHDDEVTVTEDK	2919.4	2919.41	-0.0051	62.97
33	RLA1_MOUSE	60S acidic ribosomal protein P1 OS=Mus musculus GN=Rplp1 PE=2 SV=1	ASVSELACIYSALILHDDEVTVTEDK	2919.4	2919.41	-0.0039	71.08
33	RLA1_MOUSE	60S acidic ribosomal protein P1 OS=Mus musculus GN=Rplp1 PE=2 SV=1	ASVSELACIYSALILHDDEVTVTEDKINALIK	3571.83	3571.83	-0.0063	99.81
33	RLA1_MOUSE	60S acidic ribosomal protein P1 OS=Mus musculus GN=Rplp1 PE=2 SV=1	ALANVNIGSLICNVGAGGPAPAAGAAPAGGAAPSTAAAPAEEK	3781.9	3781.91	-0.01	53.79
33	RLA1_MOUSE	60S acidic ribosomal protein P1 OS=Mus musculus GN=Rplp1 PE=2 SV=1	ALANVNIGSLICNVGAGGPAPAAGAAPAGGAAPSTAAAPAEEK	3781.9	3781.91	-0.0089	44.88
33	RLA1_MOUSE	60S acidic ribosomal protein P1 OS=Mus musculus GN=Rplp1 PE=2 SV=1	ALANVNIGSLICNVGAGGPAPAAGAAPAGGAAPSTAAAPAEEK	3781.9	3781.91	-0.0078	36
34	HNRPU_MOUSE	60S acidic ribosomal protein P1 OS=Mus musculus GN=Rplp1 PE=2 SV=1	ALANVNIGSLICNVGAGGPAPAAGAAPAGGAAPSTAAAPAEEK	3781.9	3781.91	-0.0058	61.01
34	HNRPU_MOUSE	Heterogeneous nuclear ribonucleoprotein U OS=Mus musculus GN=Hnrnpu PE=1 SV=1	AVVVCPK	771.431	771.431	-0.0008	27.04
34	HNRPU_MOUSE	Heterogeneous nuclear ribonucleoprotein U OS=Mus musculus GN=Hnrnpu PE=1 SV=1	MCLFAGFQR	1128.52	1128.52	-0.0017	51.28
34	HNRPU_MOUSE	Heterogeneous nuclear ribonucleoprotein U OS=Mus musculus GN=Hnrnpu PE=1 SV=1	MCLFAGFQR	1128.52	1128.52	-0.0017	46.68
34	HNRPU_MOUSE	Heterogeneous nuclear ribonucleoprotein U OS=Mus musculus GN=Hnrnpu PE=1 SV=1	MCLFAGFQR	1144.51	1144.52	-0.0025	41.57
34	HNRPU_MOUSE	Heterogeneous nuclear ribonucleoprotein U OS=Mus musculus GN=Hnrnpu PE=1 SV=1	TCNCETEDYGEK	1504.54	1504.54	-0.0022	62.86
34	HNRPU_MOUSE	Heterogeneous nuclear ribonucleoprotein U OS=Mus musculus GN=Hnrnpu PE=1 SV=1	PYFPIPEDCTFIQNVPLEDR	2449.16	2449.16	-0.007	53.69
34	HNRPU_MOUSE	Heterogeneous nuclear ribonucleoprotein U OS=Mus musculus GN=Hnrnpu PE=1 SV=1	PYFPIPEDCTFIQNVPLEDR	2449.16	2449.16	-0.0021	29.47
34	HNRPU_MOUSE	Heterogeneous nuclear ribonucleoprotein U OS=Mus musculus GN=Hnrnpu PE=1 SV=1	PYFPIPEDCTFIQNVPLEDR	2449.16	2449.16	-0.0019	41.68
34	HNRPU_MOUSE	Heterogeneous nuclear ribonucleoprotein U OS=Mus musculus GN=Hnrnpu PE=1 SV=1	EKPYFPIPEDCTFIQNVPLEDR	2706.3	2706.3	-0.0044	40.85
34	HNRPU_MOUSE	Heterogeneous nuclear ribonucleoprotein U OS=Mus musculus GN=Hnrnpu PE=1 SV=1	EKPYFPIPEDCTFIQNVPLEDR	2706.3	2706.3	-0.0044	39.82
34	HNRPU_MOUSE	Heterogeneous nuclear ribonucleoprotein U OS=Mus musculus GN=Hnrnpu PE=1 SV=1	FDENDVITCFANFETDEVELSYAK	2855.24	2855.25	-0.0051	97.56
34	HNRPU_MOUSE	Heterogeneous nuclear ribonucleoprotein U OS=Mus musculus GN=Hnrnpu PE=1 SV=1	FDENDVITCFANFETDEVELSYAK	2855.24	2855.25	-0.0041	81.08
34	HNRPU_MOUSE	Heterogeneous nuclear ribonucleoprotein U OS=Mus musculus GN=Hnrnpu PE=1 SV=1	FDENDVITCFANFETDEVELSYAK	2855.24	2855.25	-0.0039	45.13
35	GDIA_MOUSE	Heterogeneous nuclear ribonucleoprotein U OS=Mus musculus GN=Hnrnpu PE=1 SV=1	FDENDVITCFANFETDEVELSYAK	2855.24	2855.25	-0.0034	53.37
35	GDIA_MOUSE	Rab GDP dissociation inhibitor alpha OS=Mus musculus GN=Gdi1 PE=1 SV=3	IICILSHPIK	1192.7	1192.7	-0.0022	47.4
35	GDIA_MOUSE	Rab GDP dissociation inhibitor alpha OS=Mus musculus GN=Gdi1 PE=1 SV=3	IICILSHPIK	1192.7	1192.7	-0.0022	29.94
35	GDIA_MOUSE	Rab GDP dissociation inhibitor alpha OS=Mus musculus GN=Gdi1 PE=1 SV=3	IICILSHPIK	1192.7	1192.7	-0.002	50.1
35	GDIA_MOUSE	Rab GDP dissociation inhibitor alpha OS=Mus musculus GN=Gdi1 PE=1 SV=3	IICILSHPIK	1192.7	1192.7	-0.0017	30.88
35	GDIA_MOUSE	Rab GDP dissociation inhibitor alpha OS=Mus musculus GN=Gdi1 PE=1 SV=3	QLICDPSYIPDR	1475.71	1475.71	-0.0023	43.83
35	GDIA_MOUSE	Rab GDP dissociation inhibitor alpha OS=Mus musculus GN=Gdi1 PE=1 SV=3	QLICDPSYIPDR	1475.71	1475.71	-0.0018	33.81
35	GDIA_MOUSE	Rab GDP dissociation inhibitor alpha OS=Mus musculus GN=Gdi1 PE=1 SV=3	TDDYLDQPCLETINR	1851.83	1851.83	-0.0041	72.93
35	GDIA_MOUSE	Rab GDP dissociation inhibitor alpha OS=Mus musculus GN=Gdi1 PE=1 SV=3	TDDYLDQPCLETINR	1851.83	1851.83	-0.0032	74.29
35	GDIA_MOUSE	Rab GDP dissociation inhibitor alpha OS=Mus musculus GN=Gdi1 PE=1 SV=3	SDIYVCMISYAHNVAAQGK	2125.99	2125.99	-0.0075	71.97
35	GDIA_MOUSE	Rab GDP dissociation inhibitor alpha OS=Mus musculus GN=Gdi1 PE=1 SV=3	NTNDANSCQIIIPQNQVNR	2198.04	2198.05	-0.006	40.39
35	GDIA_MOUSE	Rab GDP dissociation inhibitor alpha OS=Mus musculus GN=Gdi1 PE=1 SV=3	NTNDANSCQIIIPQNQVNR	2198.05	2198.05	-0.0048	58.29
35	GDIA_MOUSE	Rab GDP dissociation inhibitor alpha OS=Mus musculus GN=Gdi1 PE=1 SV=3	NTNDANSCQIIIPQNQVNR	2198.05	2198.05	-0.0036	106.02
36	HS90A_MOUSE	Rab GDP dissociation inhibitor alpha OS=Mus musculus GN=Gdi1 PE=1 SV=3	NTNDANSCQIIIPQNQVNR	2198.05	2198.05	-0.0033	41.03
36	HS90A_MOUSE	Heat shock protein HSP 90-alpha OS=Mus musculus GN=Hsp90aa1 PE=1 SV=4	FENLCK	809.372	809.374	-0.0017	33.06
36	HS90A_MOUSE	Heat shock protein HSP 90-alpha OS=Mus musculus GN=Hsp90aa1 PE=1 SV=4	FENLCK	809.373	809.374	-0.0016	33.41
36	HS90A_MOUSE	Heat shock protein HSP 90-alpha OS=Mus musculus GN=Hsp90aa1 PE=1 SV=4	FENLCK	809.373	809.374	-0.0008	30.33
36	HS90A_MOUSE	Heat shock protein HSP 90-alpha OS=Mus musculus GN=Hsp90aa1 PE=1 SV=4	FENLCK	809.374	809.374	-0.0007	28.79
36	HS90A_MOUSE	Heat shock protein HSP 90-alpha OS=Mus musculus GN=Hsp90aa1 PE=1 SV=4	CLELFTELAEDKENYK	2000.94	2000.94	0.0011	52.14
36	HS90A_MOUSE	Heat shock protein HSP 90-alpha OS=Mus musculus GN=Hsp90aa1 PE=1 SV=4	VFIMDNCEELIPEYLNFIR	2414.16	2414.16	-0.0043	48.22
36	HS90A_MOUSE	Heat shock protein HSP 90-alpha OS=Mus musculus GN=Hsp90aa1 PE=1 SV=4	VFIMDNCEELIPEYLNFIR	2414.16	2414.16	-0.0033	56.18
36	HS90A_MOUSE	Heat shock protein HSP 90-alpha OS=Mus musculus GN=Hsp90aa1 PE=1 SV=4	VFIMDNCEELIPEYLNFIR	2414.16	2414.16	-0.0031	32.52
36	HS90A_MOUSE	Heat shock protein HSP 90-alpha OS=Mus musculus GN=Hsp90aa1 PE=1 SV=4	VFIMDNCEELIPEYLNFIR	2414.16	2414.16	-0.0007	32.33
36	HS90A_MOUSE	Heat shock protein HSP 90-alpha OS=Mus musculus GN=Hsp90aa1 PE=1 SV=4	VFIMDNCEELIPEYLNFIR	2430.16	2430.16	-0.0043	32.17
36	HS90A_MOUSE	Heat shock protein HSP 90-alpha OS=Mus musculus GN=Hsp90aa1 PE=1 SV=4	VFIMDNCEELIPEYLNFIR	2430.16	2430.16	-0.0043	49.16
36	HS90A_MOUSE	Heat shock protein HSP 90-alpha OS=Mus musculus GN=Hsp90aa1 PE=1 SV=4	VFIMDNCEELIPEYLNFIR	2430.16	2430.16	-0.0036	23.44
36	HS90A_MOUSE	Heat shock protein HSP 90-alpha OS=Mus musculus GN=Hsp90aa1 PE=1 SV=4	LVTSPCCIVTSTYGWTANMER	2445.11	2445.11	-0.0062	92.74
36	HS90A_MOUSE	Heat shock protein HSP 90-alpha OS=Mus musculus GN=Hsp90aa1 PE=1 SV=4	LVTSPCCIVTSTYGWTANMER	2445.11	2445.11	-0.0042	78.61
36	HS90A_MOUSE	Heat shock protein HSP 90-alpha OS=Mus musculus GN=Hsp90aa1 PE=1 SV=4	LVTSPCCIVTSTYGWTANMER	2445.11	2445.11	-0.0021	49.47
36	HS90A_MOUSE	Heat shock protein HSP 90-alpha OS=Mus musculus GN=Hsp90aa1 PE=1 SV=4	HGLEVIYMIEPIDEYCVQQLK	2576.26	2576.27	-0.0045	24.09
37	HMGB1_MOUSE	Heat shock protein HSP 90-alpha OS=Mus musculus GN=Hsp90aa1 PE=1 SV=4	HGLEVIYMIEPIDEYCVQQLK	2576.26	2576.27	-0.0043	42.25
37	HMGB1_MOUSE	High mobility group protein B1 OS=Mus musculus GN=Hmgb1 PE=1 SV=2	MSSYAFFVQTCR	1495.66	1495.66	-0.0027	76.43
37	HMGB1_MOUSE	High mobility group protein B1 OS=Mus musculus GN=Hmgb1 PE=1 SV=2	MSSYAFFVQTCR	1495.66	1495.66	-0.0017	74.91
37	HMGB1_MOUSE	High mobility group protein B1 OS=Mus musculus GN=Hmgb1 PE=1 SV=2	MSSYAFFVQTCR	1511.65	1511.65	-0.0024	95.71
37	HMGB1_MOUSE	High mobility group protein B1 OS=Mus musculus GN=Hmgb1 PE=1 SV=2	MSSYAFFVQTCR	1511.65	1511.65	-0.0018	84.07
37	HMGB1_MOUSE	High mobility group protein B1 OS=Mus musculus GN=Hmgb1 PE=1 SV=2	RPPSAFFLFCSEYR	1775.84	1775.85	-0.003	52.11
37	HMGB1_MOUSE	High mobility group protein B1 OS=Mus musculus GN=Hmgb1 PE=1 SV=2	RPPSAFFLFCSEYR	1775.84	1775.85	-0.0023	45.99
37	HMGB1_MOUSE	High mobility group protein B1 OS=Mus musculus GN=Hmgb1 PE=1 SV=2	RPPSAFFLFCSEYR	1775.84	1775.85	-0.0021	27.96
37	HMGB1_MOUSE	High mobility group protein B1 OS=Mus musculus GN=Hmgb1 PE=1 SV=2	RPPSAFFLFCSEYR	1775.84	1775.85	-0.0014	43.95
37	HMGB1_MOUSE	High mobility group protein B1 OS=Mus musculus GN=Hmgb1 PE=1 SV=2	RPPSAFFLFCSEYRPK	2000.99	2000.99	-0.0039	32.61
37	HMGB1_MOUSE	High mobility group protein B1 OS=Mus musculus GN=Hmgb1 PE=1 SV=2	RPPSAFFLFCSEYRPK	2000.99	2000.99	-0.0033	26.66
37	HMGB1_MOUSE	High mobility group protein B1 OS=Mus musculus GN=Hmgb1 PE=1 SV=2	RPPSAFFLFCSEYRPK	2000.99	2000.99	-0.003	53.11
37	HMGB1_MOUSE	High mobility group protein B1 OS=Mus musculus GN=Hmgb1 PE=1 SV=2	RPPSAFFLFCSEYRPK	2000.99	2000.99	-0.0024	51.08
38	ENOA_MOUSE	High mobility group protein B1 OS=Mus musculus GN=Hmgb1 PE=1 SV=2	RPPSAFFLFCSEYRPK	2000.99	2000.99	-0.0004	21.06
38	ENOA_MOUSE	Alpha-enolase OS=Mus musculus GN=Eno1 PE=1 SV=3	SCNCLLLK	1006.49	1006.49	-0.0023	27.04
38	ENOA_MOUSE	Alpha-enolase OS=Mus musculus GN=Eno1 PE=1 SV=3	SCNCLLLK	1006.49	1006.49	-0.0018	31.35
38	ENOA_MOUSE	Alpha-enolase OS=Mus musculus GN=Eno1 PE=1 SV=3	VNQIGSVTESLQACK	1632.81	1632.81	-0.0027	114.77
38	ENOA_MOUSE	Alpha-enolase OS=Mus musculus GN=Eno1 PE=1 SV=3	VNQIGSVTESLQACK	1632.81	1632.81	-0.0024	108.15
38	ENOA_MOUSE	Alpha-enolase OS=Mus musculus GN=Eno1 PE=1 SV=3	SGETEDTFIADLVVGLCTGQIK	2352.15	2352.15	-0.0031	86.16
38	ENOA_MOUSE	Alpha-enolase OS=Mus musculus GN=Eno1 PE=1 SV=3	SGETEDTFIADLVVGLCTGQIK	2352.15	2352.15	-0.0024	91.83
38	ENOA_MOUSE	Alpha-enolase OS=Mus musculus GN=Eno1 PE=1 SV=3	SGETEDTFIADLVVGLCTGQIK	2352.15	2352.15	-0.0018	64.33
39	2AAA_MOUSE	Alpha-enolase OS=Mus musculus GN=Eno1 PE=1 SV=3	SGETEDTFIADLVVGLCTGQIK	2352.15	2352.15	-0.0013	72.45
39	2AAA_MOUSE	Serine/threonine-protein phosphatase 2A 65 kDa regulatory subunit A alpha isoform OS=Mus musculus GN=Ppp2r1a PE=1 SV=3	TSACGLFSVCYPR	1516.68	1516.68	-0.0018	43.93
39	2AAA_MOUSE	Serine/threonine-protein phosphatase 2A 65 kDa regulatory subunit A alpha isoform OS=Mus musculus GN=Ppp2r1a PE=1 SV=3	LNIISNLDCVNEVIGIR	1941.03	1941.04	-0.0031	52.26
39	2AAA_MOUSE	Serine/threonine-protein phosphatase 2A 65 kDa regulatory subunit A alpha isoform OS=Mus musculus GN=Ppp2r1a PE=1 SV=3	LNIISNLDCVNEVIGIR	1941.03	1941.04	-0.0019	95.35
39	2AAA_MOUSE	Serine/threonine-protein phosphatase 2A 65 kDa regulatory subunit A alpha isoform OS=Mus musculus GN=Ppp2r1a PE=1 SV=3	LNIISNLDCVNEVIGIR	1941.03	1941.04	-0.0017	66.75
39	2AAA_MOUSE	Serine/threonine-protein phosphatase 2A 65 kDa regulatory subunit A alpha isoform OS=Mus musculus GN=Ppp2r1a PE=1 SV=3	LNIISNLDCVNEVIGIR	1941.03	1941.04	-0.0008	90.91
39	2AAA_MOUSE	Serine/threonine-protein phosphatase 2A 65 kDa regulatory subunit A alpha isoform OS=Mus musculus GN=Ppp2r1a PE=1 SV=3	LNSLCMAWLVDHVYAIR	2060.03	2060.03	-0.0037	31.4
39	2AAA_MOUSE	Serine/threonine-protein phosphatase 2A 65 kDa regulatory subunit A alpha isoform OS=Mus musculus GN=Ppp2r1a PE=1 SV=3	DNTIEHLLPLFLAQLKDECPEVR	2749.41	2749.41	-0.0039	51.16
39	2AAA_MOUSE	Serine/threonine-protein phosphatase 2A 65 kDa regulatory subunit A alpha isoform OS=Mus musculus GN=Ppp2r1a PE=1 SV=3	DNTIEHLLPLFLAQLKDECPEVR	2749.41	2749.41	-0.0037	73.84
39	2AAA_MOUSE	Serine/threonine-protein phosphatase 2A 65 kDa regulatory subunit A alpha isoform OS=Mus musculus GN=Ppp2r1a PE=1 SV=3	DNTIEHLLPLFLAQLKDECPEVR	2749.41	2749.41	-0.003	52.61
40	GDIB_MOUSE	Serine/threonine-protein phosphatase 2A 65 kDa regulatory subunit A alpha isoform OS=Mus musculus GN=Ppp2r1a PE=1 SV=3	DNTIEHLLPLFLAQLKDECPEVR	2749.41	2749.41	-0.0021	55.92
40	GDIB_MOUSE	Rab GDP dissociation inhibitor beta OS=Mus musculus GN=Gdi2 PE=1 SV=1	VICILSHPIK	1178.68	1178.68	-0.0024	34.48
40	GDIB_MOUSE	Rab GDP dissociation inhibitor beta OS=Mus musculus GN=Gdi2 PE=1 SV=1	VICILSHPIK	1178.68	1178.68	-0.0024	25.29
40	GDIB_MOUSE	Rab GDP dissociation inhibitor beta OS=Mus musculus GN=Gdi2 PE=1 SV=1	VICILSHPIK	1178.68	1178.68	-0.0023	21.69
40	GDIB_MOUSE	Rab GDP dissociation inhibitor beta OS=Mus musculus GN=Gdi2 PE=1 SV=1	VICILSHPIK	1178.68	1178.68	-0.0022	47.06
40	GDIB_MOUSE	Rab GDP dissociation inhibitor beta OS=Mus musculus GN=Gdi2 PE=1 SV=1	QLICDPSYVK	1221.6	1221.61	-0.003	34.98
40	GDIB_MOUSE	Rab GDP dissociation inhibitor beta OS=Mus musculus GN=Gdi2 PE=1 SV=1	QLICDPSYVK	1221.6	1221.61	-0.0022	35.98
40	GDIB_MOUSE	Rab GDP dissociation inhibitor beta OS=Mus musculus GN=Gdi2 PE=1 SV=1	TDDYLDQPCCETINR	1898.77	1898.78	-0.0042	57.99
40	GDIB_MOUSE	Rab GDP dissociation inhibitor beta OS=Mus musculus GN=Gdi2 PE=1 SV=1	TDDYLDQPCCETINR	1898.77	1898.78	-0.0038	68
40	GDIB_MOUSE	Rab GDP dissociation inhibitor beta OS=Mus musculus GN=Gdi2 PE=1 SV=1	SDIYVCMISFAHNVAAQGK	2109.99	2110	-0.0039	42.3
40	GDIB_MOUSE	Rab GDP dissociation inhibitor beta OS=Mus musculus GN=Gdi2 PE=1 SV=1	SDIYVCMISFAHNVAAQGK	2125.99	2125.99	-0.0075	47.84
40	GDIB_MOUSE	Rab GDP dissociation inhibitor beta OS=Mus musculus GN=Gdi2 PE=1 SV=1	NTNDANSCQIIIPQNQVNR	2198.04	2198.05	-0.006	40.39
40	GDIB_MOUSE	Rab GDP dissociation inhibitor beta OS=Mus musculus GN=Gdi2 PE=1 SV=1	NTNDANSCQIIIPQNQVNR	2198.05	2198.05	-0.0048	58.29
40	GDIB_MOUSE	Rab GDP dissociation inhibitor beta OS=Mus musculus GN=Gdi2 PE=1 SV=1	NTNDANSCQIIIPQNQVNR	2198.05	2198.05	-0.0036	106.02
40	GDIB_MOUSE	Rab GDP dissociation inhibitor beta OS=Mus musculus GN=Gdi2 PE=1 SV=1	NTNDANSCQIIIPQNQVNR	2198.05	2198.05	-0.0033	41.03
41	HS90B_MOUSE	Rab GDP dissociation inhibitor beta OS=Mus musculus GN=Gdi2 PE=1 SV=1	AYDATTHFETTCDDIKDIYK	2406.06	2406.07	-0.0047	57.13
41	HS90B_MOUSE	Heat shock protein HSP 90-beta OS=Mus musculus GN=Hsp90ab1 PE=1 SV=3	FENLCK	809.372	809.374	-0.0017	33.06
41	HS90B_MOUSE	Heat shock protein HSP 90-beta OS=Mus musculus GN=Hsp90ab1 PE=1 SV=3	FENLCK	809.373	809.374	-0.0016	33.41
41	HS90B_MOUSE	Heat shock protein HSP 90-beta OS=Mus musculus GN=Hsp90ab1 PE=1 SV=3	FENLCK	809.373	809.374	-0.0008	30.33
41	HS90B_MOUSE	Heat shock protein HSP 90-beta OS=Mus musculus GN=Hsp90ab1 PE=1 SV=3	FENLCK	809.374	809.374	-0.0007	28.79
41	HS90B_MOUSE	Heat shock protein HSP 90-beta OS=Mus musculus GN=Hsp90ab1 PE=1 SV=3	CLELFSELAEDK	1452.68	1452.68	-0.0005	49.78
41	HS90B_MOUSE	Heat shock protein HSP 90-beta OS=Mus musculus GN=Hsp90ab1 PE=1 SV=3	CLELFSELAEDKENYK	1986.92	1986.92	-0.0057	32.23
41	HS90B_MOUSE	Heat shock protein HSP 90-beta OS=Mus musculus GN=Hsp90ab1 PE=1 SV=3	CLELFSELAEDKENYK	1986.92	1986.92	-0.0043	41.69
41	HS90B_MOUSE	Heat shock protein HSP 90-beta OS=Mus musculus GN=Hsp90ab1 PE=1 SV=3	CLELFSELAEDKENYK	1986.92	1986.92	-0.0025	31.02
41	HS90B_MOUSE	Heat shock protein HSP 90-beta OS=Mus musculus GN=Hsp90ab1 PE=1 SV=3	VFIMDSCDELIPEYLNFIR	2373.13	2373.14	-0.0041	42.9
41	HS90B_MOUSE	Heat shock protein HSP 90-beta OS=Mus musculus GN=Hsp90ab1 PE=1 SV=3	VFIMDSCDELIPEYLNFIR	2373.13	2373.14	-0.0039	25.77
41	HS90B_MOUSE	Heat shock protein HSP 90-beta OS=Mus musculus GN=Hsp90ab1 PE=1 SV=3	VFIMDSCDELIPEYLNFIR	2373.14	2373.14	-0.0019	47.99
41	HS90B_MOUSE	Heat shock protein HSP 90-beta OS=Mus musculus GN=Hsp90ab1 PE=1 SV=3	LVSSPCCIVTSTYGWTANMER	2431.09	2431.1	-0.0056	88.93
41	HS90B_MOUSE	Heat shock protein HSP 90-beta OS=Mus musculus GN=Hsp90ab1 PE=1 SV=3	LVSSPCCIVTSTYGWTANMER	2431.09	2431.1	-0.0049	89.12
41	HS90B_MOUSE	Heat shock protein HSP 90-beta OS=Mus musculus GN=Hsp90ab1 PE=1 SV=3	LVSSPCCIVTSTYGWTANMER	2431.09	2431.1	-0.0036	30.64
41	HS90B_MOUSE	Heat shock protein HSP 90-beta OS=Mus musculus GN=Hsp90ab1 PE=1 SV=3	LVSSPCCIVTSTYGWTANMER	2431.1	2431.1	-0.0018	42.15
41	HS90B_MOUSE	Heat shock protein HSP 90-beta OS=Mus musculus GN=Hsp90ab1 PE=1 SV=3	GFEVVYMTEPIDEYCVQQLK	2447.13	2447.14	-0.0092	26.49
42	HMGB2_MOUSE	Heat shock protein HSP 90-beta OS=Mus musculus GN=Hsp90ab1 PE=1 SV=3	GFEVVYMTEPIDEYCVQQLK	2447.13	2447.14	-0.0048	60.54
42	HMGB2_MOUSE	High mobility group protein B2 OS=Mus musculus GN=Hmgb2 PE=1 SV=3	MSSYAFFVQTCR	1495.66	1495.66	-0.0027	76.43
42	HMGB2_MOUSE	High mobility group protein B2 OS=Mus musculus GN=Hmgb2 PE=1 SV=3	MSSYAFFVQTCR	1495.66	1495.66	-0.0017	74.91
42	HMGB2_MOUSE	High mobility group protein B2 OS=Mus musculus GN=Hmgb2 PE=1 SV=3	MSSYAFFVQTCR	1511.65	1511.65	-0.0024	95.71
42	HMGB2_MOUSE	High mobility group protein B2 OS=Mus musculus GN=Hmgb2 PE=1 SV=3	MSSYAFFVQTCR	1511.65	1511.65	-0.0018	84.07
42	HMGB2_MOUSE	High mobility group protein B2 OS=Mus musculus GN=Hmgb2 PE=1 SV=3	RPPSAFFLFCSENR	1726.82	1726.83	-0.0029	52.4
42	HMGB2_MOUSE	High mobility group protein B2 OS=Mus musculus GN=Hmgb2 PE=1 SV=3	RPPSAFFLFCSENR	1726.82	1726.83	-0.0019	32.14
42	HMGB2_MOUSE	High mobility group protein B2 OS=Mus musculus GN=Hmgb2 PE=1 SV=3	RPPSAFFLFCSENR	1726.82	1726.83	-0.0008	22.55
42	HMGB2_MOUSE	High mobility group protein B2 OS=Mus musculus GN=Hmgb2 PE=1 SV=3	RPPSAFFLFCSENRPK	1951.97	1951.97	-0.0044	45.62
42	HMGB2_MOUSE	High mobility group protein B2 OS=Mus musculus GN=Hmgb2 PE=1 SV=3	RPPSAFFLFCSENRPK	1951.97	1951.97	-0.0042	27.13
42	HMGB2_MOUSE	High mobility group protein B2 OS=Mus musculus GN=Hmgb2 PE=1 SV=3	RPPSAFFLFCSENRPK	1951.97	1951.97	-0.0041	29.07
42	HMGB2_MOUSE	High mobility group protein B2 OS=Mus musculus GN=Hmgb2 PE=1 SV=3	RPPSAFFLFCSENRPK	1951.97	1951.97	-0.0038	37.63
42	HMGB2_MOUSE	High mobility group protein B2 OS=Mus musculus GN=Hmgb2 PE=1 SV=3	RPPSAFFLFCSENRPK	1951.97	1951.97	-0.0024	21.59
43	ENOB_MOUSE	High mobility group protein B2 OS=Mus musculus GN=Hmgb2 PE=1 SV=3	RPPSAFFLFCSENRPK	1951.97	1951.97	-0.0016	58.7
43	ENOB_MOUSE	Beta-enolase OS=Mus musculus GN=Eno3 PE=1 SV=3	VNQIGSVTESIQACK	1632.81	1632.81	-0.0027	114.77
43	ENOB_MOUSE	Beta-enolase OS=Mus musculus GN=Eno3 PE=1 SV=3	VNQIGSVTESIQACK	1632.81	1632.81	-0.0024	108.15
43	ENOB_MOUSE	Beta-enolase OS=Mus musculus GN=Eno3 PE=1 SV=3	SGETEDTFIADLVVGLCTGQIK	2352.15	2352.15	-0.0031	86.16
43	ENOB_MOUSE	Beta-enolase OS=Mus musculus GN=Eno3 PE=1 SV=3	SGETEDTFIADLVVGLCTGQIK	2352.15	2352.15	-0.0024	91.83
43	ENOB_MOUSE	Beta-enolase OS=Mus musculus GN=Eno3 PE=1 SV=3	SGETEDTFIADLVVGLCTGQIK	2352.15	2352.15	-0.0018	64.33
44	AATM_MOUSE	Beta-enolase OS=Mus musculus GN=Eno3 PE=1 SV=3	SGETEDTFIADLVVGLCTGQIK	2352.15	2352.15	-0.0013	72.45
44	AATM_MOUSE	Aspartate aminotransferase, mitochondrial OS=Mus musculus GN=Got2 PE=1 SV=1	VGAFTVVCK	979.514	979.516	-0.0021	60.51
44	AATM_MOUSE	Aspartate aminotransferase, mitochondrial OS=Mus musculus GN=Got2 PE=1 SV=1	VGAFTVVCK	979.514	979.516	-0.0019	61.04
44	AATM_MOUSE	Aspartate aminotransferase, mitochondrial OS=Mus musculus GN=Got2 PE=1 SV=1	EYLPIGGLAEFCK	1495.74	1495.74	-0.0018	50.36
44	AATM_MOUSE	Aspartate aminotransferase, mitochondrial OS=Mus musculus GN=Got2 PE=1 SV=1	EYLPIGGLAEFCK	1495.74	1495.74	-0.0017	36.82
44	AATM_MOUSE	Aspartate aminotransferase, mitochondrial OS=Mus musculus GN=Got2 PE=1 SV=1	VGAFTVVCKDAEEAK	1622.79	1622.8	-0.0034	38.65
44	AATM_MOUSE	Aspartate aminotransferase, mitochondrial OS=Mus musculus GN=Got2 PE=1 SV=1	VGAFTVVCKDAEEAK	1622.79	1622.8	-0.0025	28.66
44	AATM_MOUSE	Aspartate aminotransferase, mitochondrial OS=Mus musculus GN=Got2 PE=1 SV=1	TCGFDFSGALEDISK	1645.73	1645.73	-0.0024	57.53
44	AATM_MOUSE	Aspartate aminotransferase, mitochondrial OS=Mus musculus GN=Got2 PE=1 SV=1	TCGFDFSGALEDISK	1645.73	1645.73	-0.0013	73.69
44	AATM_MOUSE	Aspartate aminotransferase, mitochondrial OS=Mus musculus GN=Got2 PE=1 SV=1	HFIEQGINVCLCQSYAK	2065.97	2065.97	-0.004	86.07
44	AATM_MOUSE	Aspartate aminotransferase, mitochondrial OS=Mus musculus GN=Got2 PE=1 SV=1	HFIEQGINVCLCQSYAK	2065.97	2065.97	-0.0035	69.47
44	AATM_MOUSE	Aspartate aminotransferase, mitochondrial OS=Mus musculus GN=Got2 PE=1 SV=1	HFIEQGINVCLCQSYAK	2065.97	2065.97	-0.0034	34.11
44	AATM_MOUSE	Aspartate aminotransferase, mitochondrial OS=Mus musculus GN=Got2 PE=1 SV=1	HFIEQGINVCLCQSYAK	2065.97	2065.97	-0.003	22.92
44	AATM_MOUSE	Aspartate aminotransferase, mitochondrial OS=Mus musculus GN=Got2 PE=1 SV=1	IPEQSVLLLHACAHNPTGVDPR	2423.23	2423.24	-0.0048	31.2
45	RLA0_MOUSE	Aspartate aminotransferase, mitochondrial OS=Mus musculus GN=Got2 PE=1 SV=1	IPEQSVLLLHACAHNPTGVDPR	2423.23	2423.24	-0.0039	20.05
45	RLA0_MOUSE	60S acidic ribosomal protein P0 OS=Mus musculus GN=Rplp0 PE=1 SV=3	CFIVGADNVGSK	1265.61	1265.61	-0.0019	67.6
45	RLA0_MOUSE	60S acidic ribosomal protein P0 OS=Mus musculus GN=Rplp0 PE=1 SV=3	CFIVGADNVGSK	1265.61	1265.61	-0.0014	69.35
45	RLA0_MOUSE	60S acidic ribosomal protein P0 OS=Mus musculus GN=Rplp0 PE=1 SV=3	AGAIAPCEVTVPAQNTGLGPEK	2179.09	2179.09	-0.0043	57.45
45	RLA0_MOUSE	60S acidic ribosomal protein P0 OS=Mus musculus GN=Rplp0 PE=1 SV=3	AGAIAPCEVTVPAQNTGLGPEK	2179.09	2179.09	-0.0038	46.14
45	RLA0_MOUSE	60S acidic ribosomal protein P0 OS=Mus musculus GN=Rplp0 PE=1 SV=3	AGAIAPCEVTVPAQNTGLGPEK	2179.09	2179.09	-0.0032	53.35
45	RLA0_MOUSE	60S acidic ribosomal protein P0 OS=Mus musculus GN=Rplp0 PE=1 SV=3	IIQLLDDYPKCFIVGADNVGSK	2464.26	2464.27	-0.0033	67.16
45	RLA0_MOUSE	60S acidic ribosomal protein P0 OS=Mus musculus GN=Rplp0 PE=1 SV=3	IIQLLDDYPKCFIVGADNVGSK	2464.27	2464.27	0	65.59
45	RLA0_MOUSE	60S acidic ribosomal protein P0 OS=Mus musculus GN=Rplp0 PE=1 SV=3	NVASVCLQIGYPTVASVPHSIINGYK	2786.44	2786.44	-0.0042	69.89
46	SC31A_MOUSE	60S acidic ribosomal protein P0 OS=Mus musculus GN=Rplp0 PE=1 SV=3	NVASVCLQIGYPTVASVPHSIINGYK	2786.44	2786.44	-0.0025	77.23
46	SC31A_MOUSE	Protein transport protein Sec31A OS=Mus musculus GN=Sec31a PE=1 SV=2	LVACWTK	876.451	876.453	-0.0021	25.77
46	SC31A_MOUSE	Protein transport protein Sec31A OS=Mus musculus GN=Sec31a PE=1 SV=2	LVACWTK	876.451	876.453	-0.0017	21.59
46	SC31A_MOUSE	Protein transport protein Sec31A OS=Mus musculus GN=Sec31a PE=1 SV=2	CLSSATDPQTK	1206.55	1206.56	-0.0017	31.2
46	SC31A_MOUSE	Protein transport protein Sec31A OS=Mus musculus GN=Sec31a PE=1 SV=2	CLSSATDPQTK	1206.55	1206.56	-0.0013	44.81
46	SC31A_MOUSE	Protein transport protein Sec31A OS=Mus musculus GN=Sec31a PE=1 SV=2	TQPPEDISCIAWNR	1685.78	1685.78	-0.0031	28.49
46	SC31A_MOUSE	Protein transport protein Sec31A OS=Mus musculus GN=Sec31a PE=1 SV=2	TQACLCYICAGNVER	1813.79	1813.79	-0.0034	111.14
46	SC31A_MOUSE	Protein transport protein Sec31A OS=Mus musculus GN=Sec31a PE=1 SV=2	TQACLCYICAGNVER	1813.79	1813.79	-0.0022	110.99
46	SC31A_MOUSE	Protein transport protein Sec31A OS=Mus musculus GN=Sec31a PE=1 SV=2	GILAVAWSMADPELLLSCGK	2130.08	2130.09	-0.0008	61.65
46	SC31A_MOUSE	Protein transport protein Sec31A OS=Mus musculus GN=Sec31a PE=1 SV=2	EALAAVLTYAKPDEFSALCDLLGTR	2723.38	2723.38	-0.0042	65.18
46	SC31A_MOUSE	Protein transport protein Sec31A OS=Mus musculus GN=Sec31a PE=1 SV=2	EALAAVLTYAKPDEFSALCDLLGTR	2723.38	2723.38	-0.0027	53.96
47	RL4_MOUSE	Protein transport protein Sec31A OS=Mus musculus GN=Sec31a PE=1 SV=2	EALAAVLTYAKPDEFSALCDLLGTR	2723.38	2723.38	-0.0016	64.2
47	RL4_MOUSE	60S ribosomal protein L4 OS=Mus musculus GN=Rpl4 PE=1 SV=3	SGQGAFGNMCR	1199.48	1199.48	-0.0017	33.69
47	RL4_MOUSE	60S ribosomal protein L4 OS=Mus musculus GN=Rpl4 PE=1 SV=3	FCIWTESAFR	1315.6	1315.6	-0.002	44.44
47	RL4_MOUSE	60S ribosomal protein L4 OS=Mus musculus GN=Rpl4 PE=1 SV=3	FCIWTESAFR	1315.6	1315.6	-0.0018	43
47	RL4_MOUSE	60S ribosomal protein L4 OS=Mus musculus GN=Rpl4 PE=1 SV=3	ACARPLISVYSEK	1534.78	1534.78	-0.0028	59.99
47	RL4_MOUSE	60S ribosomal protein L4 OS=Mus musculus GN=Rpl4 PE=1 SV=3	GPCIIYNEDNGIIK	1604.78	1604.79	-0.0025	54.91
47	RL4_MOUSE	60S ribosomal protein L4 OS=Mus musculus GN=Rpl4 PE=1 SV=3	GPCIIYNEDNGIIK	1604.78	1604.79	-0.0019	61.18
47	RL4_MOUSE	60S ribosomal protein L4 OS=Mus musculus GN=Rpl4 PE=1 SV=3	RGPCIIYNEDNGIIK	1760.88	1760.89	-0.0035	41.36
47	RL4_MOUSE	60S ribosomal protein L4 OS=Mus musculus GN=Rpl4 PE=1 SV=3	RGPCIIYNEDNGIIK	1760.88	1760.89	-0.0033	27.81
47	RL4_MOUSE	60S ribosomal protein L4 OS=Mus musculus GN=Rpl4 PE=1 SV=3	RGPCIIYNEDNGIIK	1760.88	1760.89	-0.0033	72.14
47	RL4_MOUSE	60S ribosomal protein L4 OS=Mus musculus GN=Rpl4 PE=1 SV=3	YAICSALAASALPALVMSK	1936.01	1936.02	-0.0021	74.82
48	IPO5_MOUSE	60S ribosomal protein L4 OS=Mus musculus GN=Rpl4 PE=1 SV=3	YAICSALAASALPALVMSK	1936.02	1936.02	-0.001	116.92
48	IPO5_MOUSE	Importin-5 OS=Mus musculus GN=Ipo5 PE=1 SV=3	ICDIAAELAR	1130.57	1130.58	-0.0018	54.41
48	IPO5_MOUSE	Importin-5 OS=Mus musculus GN=Ipo5 PE=1 SV=3	ENVNATENCISAVGK	1604.74	1604.75	-0.0019	65.73
48	IPO5_MOUSE	Importin-5 OS=Mus musculus GN=Ipo5 PE=1 SV=3	QWGLCIFDDIVEHCSPASFK	2408.09	2408.09	-0.0038	44.48
48	IPO5_MOUSE	Importin-5 OS=Mus musculus GN=Ipo5 PE=1 SV=3	AAAAAEQQQFYLLLGNLLSPDNVVR	2742.43	2742.43	-0.0067	50.07
48	IPO5_MOUSE	Importin-5 OS=Mus musculus GN=Ipo5 PE=1 SV=3	AAAAAEQQQFYLLLGNLLSPDNVVR	2742.43	2742.43	-0.0054	58.6
48	IPO5_MOUSE	Importin-5 OS=Mus musculus GN=Ipo5 PE=1 SV=3	HFADLLPGFLQAVNDSCYQNDDSVLK	2965.39	2965.39	-0.0043	87.37
48	IPO5_MOUSE	Importin-5 OS=Mus musculus GN=Ipo5 PE=1 SV=3	HFADLLPGFLQAVNDSCYQNDDSVLK	2965.39	2965.39	-0.0017	85.34
48	IPO5_MOUSE	Importin-5 OS=Mus musculus GN=Ipo5 PE=1 SV=3	QVQTSGGLWTECIAQLSPEQQAAIQELLNSA	3369.65	3369.65	-0.0035	51.08
49	PYR1_MOUSE	Importin-5 OS=Mus musculus GN=Ipo5 PE=1 SV=3	EEAVQTFSYLCDLIESNHPIVLGPNNTNLPK	3511.73	3511.73	-0.0006	72.36
49	PYR1_MOUSE	CAD protein OS=Mus musculus GN=Cad PE=2 SV=1	QELGICPAVK	1113.58	1113.59	-0.0017	23.57
49	PYR1_MOUSE	CAD protein OS=Mus musculus GN=Cad PE=2 SV=1	IDCWFLHR	1145.54	1145.54	-0.0029	31.01
49	PYR1_MOUSE	CAD protein OS=Mus musculus GN=Cad PE=2 SV=1	IDCWFLHR	1145.54	1145.54	-0.0018	25.19
49	PYR1_MOUSE	CAD protein OS=Mus musculus GN=Cad PE=2 SV=1	IDCWFLHR	1145.54	1145.54	-0.0018	26
49	PYR1_MOUSE	CAD protein OS=Mus musculus GN=Cad PE=2 SV=1	GHNQPCLLVGTGR	1407.7	1407.7	-0.0029	44.1
49	PYR1_MOUSE	CAD protein OS=Mus musculus GN=Cad PE=2 SV=1	GHNQPCLLVGTGR	1407.7	1407.7	-0.0026	34.24
49	PYR1_MOUSE	CAD protein OS=Mus musculus GN=Cad PE=2 SV=1	GHNQPCLLVGTGR	1407.7	1407.7	-0.0021	45.23
49	PYR1_MOUSE	CAD protein OS=Mus musculus GN=Cad PE=2 SV=1	TVHSLACLLTQYR	1560.81	1560.81	-0.0024	33.67
49	PYR1_MOUSE	CAD protein OS=Mus musculus GN=Cad PE=2 SV=1	NSVTGGTAAFEPSLDYCVVK	2113.99	2114	-0.0046	67.57
49	PYR1_MOUSE	CAD protein OS=Mus musculus GN=Cad PE=2 SV=1	NSVTGGTAAFEPSLDYCVVK	2114	2114	-0.0011	76.96
49	PYR1_MOUSE	CAD protein OS=Mus musculus GN=Cad PE=2 SV=1	AQGLPVTCEVAPHHLFLNR	2158.11	2158.11	-0.0039	30.94
49	PYR1_MOUSE	CAD protein OS=Mus musculus GN=Cad PE=2 SV=1	AQGLPVTCEVAPHHLFLNR	2158.11	2158.11	-0.0035	28.65
49	PYR1_MOUSE	CAD protein OS=Mus musculus GN=Cad PE=2 SV=1	NSVTGGTAAFEPSLDYCVVKIPR	2480.23	2480.24	-0.0031	40.46
49	PYR1_MOUSE	CAD protein OS=Mus musculus GN=Cad PE=2 SV=1	NSVTGGTAAFEPSLDYCVVKIPR	2480.23	2480.24	-0.0029	33.88
49	PYR1_MOUSE	CAD protein OS=Mus musculus GN=Cad PE=2 SV=1	CLCQLGAEVTVVPWDHELDSQK	2583.21	2583.21	-0.0031	40.8
49	PYR1_MOUSE	CAD protein OS=Mus musculus GN=Cad PE=2 SV=1	CGPKPPPGFPGLETMLPLLLTAVSEGR	2833.48	2833.49	-0.0039	64.07
49	PYR1_MOUSE	CAD protein OS=Mus musculus GN=Cad PE=2 SV=1	CGPKPPPGFPGLETMLPLLLTAVSEGR	2833.48	2833.49	-0.0034	26.57
50	TCPH_MOUSE	CAD protein OS=Mus musculus GN=Cad PE=2 SV=1	VLSEPNPRPVFGICLGHQLLALAIGAK	2869.6	2869.6	-0.0003	47.4
50	TCPH_MOUSE	T-complex protein 1 subunit eta OS=Mus musculus GN=Cct7 PE=1 SV=1	TCTIILR	875.489	875.49	-0.0014	41.23
50	TCPH_MOUSE	T-complex protein 1 subunit eta OS=Mus musculus GN=Cct7 PE=1 SV=1	TCTIILR	875.489	875.49	-0.0012	46.33
50	TCPH_MOUSE	T-complex protein 1 subunit eta OS=Mus musculus GN=Cct7 PE=1 SV=1	YNFFTGCPK	1132.5	1132.5	-0.0016	43.35
50	TCPH_MOUSE	T-complex protein 1 subunit eta OS=Mus musculus GN=Cct7 PE=1 SV=1	YNFFTGCPK	1132.5	1132.5	-0.0013	47.03
50	TCPH_MOUSE	T-complex protein 1 subunit eta OS=Mus musculus GN=Cct7 PE=1 SV=1	YNFFTGCPK	1132.5	1132.5	-0.001	33.47
50	TCPH_MOUSE	T-complex protein 1 subunit eta OS=Mus musculus GN=Cct7 PE=1 SV=1	QLCDNAGFDATNILNK	1792.84	1792.84	-0.0035	84.43
50	TCPH_MOUSE	T-complex protein 1 subunit eta OS=Mus musculus GN=Cct7 PE=1 SV=1	INALTAASEAACLIVSVDETIK	2288.19	2288.19	-0.0023	77.87
50	TCPH_MOUSE	T-complex protein 1 subunit eta OS=Mus musculus GN=Cct7 PE=1 SV=1	INALTAASEAACLIVSVDETIKNPR	2655.39	2655.39	-0.0027	47.18
50	TCPH_MOUSE	T-complex protein 1 subunit eta OS=Mus musculus GN=Cct7 PE=1 SV=1	INALTAASEAACLIVSVDETIKNPR	2655.39	2655.39	-0.0025	44.63
50	TCPH_MOUSE	T-complex protein 1 subunit eta OS=Mus musculus GN=Cct7 PE=1 SV=1	EGTDSSQGIPQLVSNISACQVIAEAVR	2828.39	2828.4	-0.0045	51.29
50	TCPH_MOUSE	T-complex protein 1 subunit eta OS=Mus musculus GN=Cct7 PE=1 SV=1	EGTDSSQGIPQLVSNISACQVIAEAVR	2828.4	2828.4	-0.0004	48.07
51	INS2_MOUSE	T-complex protein 1 subunit eta OS=Mus musculus GN=Cct7 PE=1 SV=1	EGTDSSQGIPQLVSNISACQVIAEAVRTTLGPR	3453.74	3453.75	-0.0094	48.03
51	INS2_MOUSE	Insulin-2 OS=Mus musculus GN=Ins2 PE=1 SV=1	QHLCGSHLVEALYLVCGER	2240.08	2240.08	-0.0026	69.59
51	INS2_MOUSE	Insulin-2 OS=Mus musculus GN=Ins2 PE=1 SV=1	QHLCGSHLVEALYLVCGER	2240.08	2240.08	-0.002	27.89
51	INS2_MOUSE	Insulin-2 OS=Mus musculus GN=Ins2 PE=1 SV=1	QHLCGSHLVEALYLVCGER	2240.08	2240.08	-0.0019	81.55
51	INS2_MOUSE	Insulin-2 OS=Mus musculus GN=Ins2 PE=1 SV=1	QHLCGSHLVEALYLVCGER	2240.08	2240.08	-0.0014	59.85
51	INS2_MOUSE	Insulin-2 OS=Mus musculus GN=Ins2 PE=1 SV=1	QHLCGSHLVEALYLVCGER	2240.08	2240.08	-0.001	50.15
51	INS2_MOUSE	Insulin-2 OS=Mus musculus GN=Ins2 PE=1 SV=1	GIVDQCCTSICSLYQLENYCN	2596.06	2596.07	-0.0054	43.91
51	INS2_MOUSE	Insulin-2 OS=Mus musculus GN=Ins2 PE=1 SV=1	GIVDQCCTSICSLYQLENYCN	2596.06	2596.07	-0.0053	20.98
51	INS2_MOUSE	Insulin-2 OS=Mus musculus GN=Ins2 PE=1 SV=1	GIVDQCCTSICSLYQLENYCN	2596.07	2596.07	-0.0037	29.66
51	INS2_MOUSE	Insulin-2 OS=Mus musculus GN=Ins2 PE=1 SV=1	GIVDQCCTSICSLYQLENYCN	2596.07	2596.07	-0.0037	78.82
51	INS2_MOUSE	Insulin-2 OS=Mus musculus GN=Ins2 PE=1 SV=1	GIVDQCCTSICSLYQLENYCN	2596.07	2596.07	-0.0037	51.75
52	EF1G_MOUSE	Insulin-2 OS=Mus musculus GN=Ins2 PE=1 SV=1	GIVDQCCTSICSLYQLENYCN	2596.07	2596.07	-0.0024	67.63
52	EF1G_MOUSE	Elongation factor 1-gamma OS=Mus musculus GN=Eef1g PE=1 SV=3	WFLTCINQPQFR	1608.78	1608.79	-0.0038	42.55
52	EF1G_MOUSE	Elongation factor 1-gamma OS=Mus musculus GN=Eef1g PE=1 SV=3	WFLTCINQPQFR	1608.78	1608.79	-0.0036	25.12
52	EF1G_MOUSE	Elongation factor 1-gamma OS=Mus musculus GN=Eef1g PE=1 SV=3	WFLTCINQPQFR	1608.78	1608.79	-0.0029	51.44
52	EF1G_MOUSE	Elongation factor 1-gamma OS=Mus musculus GN=Eef1g PE=1 SV=3	WFLTCINQPQFR	1608.78	1608.79	-0.0026	20.26
52	EF1G_MOUSE	Elongation factor 1-gamma OS=Mus musculus GN=Eef1g PE=1 SV=3	WFLTCINQPQFR	1608.78	1608.79	-0.0024	55.48
52	EF1G_MOUSE	Elongation factor 1-gamma OS=Mus musculus GN=Eef1g PE=1 SV=3	WFLTCINQPQFR	1608.79	1608.79	-0.0019	55.52
52	EF1G_MOUSE	Elongation factor 1-gamma OS=Mus musculus GN=Eef1g PE=1 SV=3	QAFPNTNRWFLTCINQPQFR	2537.23	2537.24	-0.0053	20.76
52	EF1G_MOUSE	Elongation factor 1-gamma OS=Mus musculus GN=Eef1g PE=1 SV=3	QAFPNTNRWFLTCINQPQFR	2537.24	2537.24	-0.0028	21.34
52	EF1G_MOUSE	Elongation factor 1-gamma OS=Mus musculus GN=Eef1g PE=1 SV=3	FPEELTQTFMSCNLITGMFQR	2549.16	2549.18	-0.0104	81.65
52	EF1G_MOUSE	Elongation factor 1-gamma OS=Mus musculus GN=Eef1g PE=1 SV=3	FPEELTQTFMSCNLITGMFQR	2549.17	2549.18	-0.0055	107.99
52	EF1G_MOUSE	Elongation factor 1-gamma OS=Mus musculus GN=Eef1g PE=1 SV=3	FPEELTQTFMSCNLITGMFQR	2549.17	2549.18	-0.0041	45.77
52	EF1G_MOUSE	Elongation factor 1-gamma OS=Mus musculus GN=Eef1g PE=1 SV=3	FPEELTQTFMSCNLITGMFQR	2549.17	2549.18	-0.002	60.08
53	GBB1_MOUSE	Elongation factor 1-gamma OS=Mus musculus GN=Eef1g PE=1 SV=3	VPAFEGDDGFCVFESNAIAYYVSNEELR	3197.42	3197.43	-0.0054	44.31
53	GBB1_MOUSE	Guanine nucleotide-binding protein G(I)/G(S)/G(T) subunit beta-1 OS=Mus musculus GN=Gnb1 PE=1 SV=3	LFVSGACDASAK	1224.58	1224.58	-0.0023	71.27
53	GBB1_MOUSE	Guanine nucleotide-binding protein G(I)/G(S)/G(T) subunit beta-1 OS=Mus musculus GN=Gnb1 PE=1 SV=3	ELAGHTGYLSCCR	1522.66	1522.67	-0.0024	64.73
53	GBB1_MOUSE	Guanine nucleotide-binding protein G(I)/G(S)/G(T) subunit beta-1 OS=Mus musculus GN=Gnb1 PE=1 SV=3	ACADATLSQITNNIDPVGR	2014.97	2014.97	-0.0033	96.49
53	GBB1_MOUSE	Guanine nucleotide-binding protein G(I)/G(S)/G(T) subunit beta-1 OS=Mus musculus GN=Gnb1 PE=1 SV=3	ACADATLSQITNNIDPVGR	2014.97	2014.97	-0.0021	70.47
53	GBB1_MOUSE	Guanine nucleotide-binding protein G(I)/G(S)/G(T) subunit beta-1 OS=Mus musculus GN=Gnb1 PE=1 SV=3	LLLAGYDDFNCNVWDALK	2126.01	2126.01	-0.0022	77.35
53	GBB1_MOUSE	Guanine nucleotide-binding protein G(I)/G(S)/G(T) subunit beta-1 OS=Mus musculus GN=Gnb1 PE=1 SV=3	LLLAGYDDFNCNVWDALK	2126.01	2126.01	-0.0015	92.27
54	SND1_MOUSE	Guanine nucleotide-binding protein G(I)/G(S)/G(T) subunit beta-1 OS=Mus musculus GN=Gnb1 PE=1 SV=3	SSWVMTCAYAPSGNYVACGGLDNICSIYNLK	3470.54	3470.54	-0.0016	39.86
54	SND1_MOUSE	Staphylococcal nuclease domain-containing protein 1 OS=Mus musculus GN=Snd1 PE=1 SV=1	LSECEEQAK	1092.47	1092.48	-0.0021	43.41
54	SND1_MOUSE	Staphylococcal nuclease domain-containing protein 1 OS=Mus musculus GN=Snd1 PE=1 SV=1	LSECEEQAK	1092.47	1092.48	-0.0016	46.64
54	SND1_MOUSE	Staphylococcal nuclease domain-containing protein 1 OS=Mus musculus GN=Snd1 PE=1 SV=1	EVCFTIENK	1138.53	1138.53	-0.0021	31.14
54	SND1_MOUSE	Staphylococcal nuclease domain-containing protein 1 OS=Mus musculus GN=Snd1 PE=1 SV=1	CVDWSIAVYTR	1368.65	1368.65	-0.0027	48.04
54	SND1_MOUSE	Staphylococcal nuclease domain-containing protein 1 OS=Mus musculus GN=Snd1 PE=1 SV=1	CVDWSIAVYTR	1368.65	1368.65	-0.0018	59.79
54	SND1_MOUSE	Staphylococcal nuclease domain-containing protein 1 OS=Mus musculus GN=Snd1 PE=1 SV=1	ETCLITFLLAGIECPR	1891.95	1891.95	-0.003	38.55
54	SND1_MOUSE	Staphylococcal nuclease domain-containing protein 1 OS=Mus musculus GN=Snd1 PE=1 SV=1	ETCLITFLLAGIECPR	1891.95	1891.95	-0.0027	60.59
54	SND1_MOUSE	Staphylococcal nuclease domain-containing protein 1 OS=Mus musculus GN=Snd1 PE=1 SV=1	ETCLITFLLAGIECPR	1891.95	1891.95	-0.0012	43.43
54	SND1_MOUSE	Staphylococcal nuclease domain-containing protein 1 OS=Mus musculus GN=Snd1 PE=1 SV=1	ETCLITFLLAGIECPR	1891.95	1891.95	-0.001	72.76
54	SND1_MOUSE	Staphylococcal nuclease domain-containing protein 1 OS=Mus musculus GN=Snd1 PE=1 SV=1	TCATVTIGGINIAEALVSK	1917.02	1917.02	-0.0024	76.86
54	SND1_MOUSE	Staphylococcal nuclease domain-containing protein 1 OS=Mus musculus GN=Snd1 PE=1 SV=1	ETCLITFLLAGIECPRGAR	2176.11	2176.11	-0.0042	27.02
55	UGGG1_MOUSE	Staphylococcal nuclease domain-containing protein 1 OS=Mus musculus GN=Snd1 PE=1 SV=1	DVQIILESCHNQNLLGTILHPNGNITELLLK	3508.87	3508.87	-0.0015	60.36
55	UGGG1_MOUSE	UDP-glucose:glycoprotein glucosyltransferase 1 OS=Mus musculus GN=Uggt1 PE=1 SV=4	FCLSLR	794.409	794.411	-0.0016	23.02
55	UGGG1_MOUSE	UDP-glucose:glycoprotein glucosyltransferase 1 OS=Mus musculus GN=Uggt1 PE=1 SV=4	FCLSLR	794.409	794.411	-0.0015	23.82
55	UGGG1_MOUSE	UDP-glucose:glycoprotein glucosyltransferase 1 OS=Mus musculus GN=Uggt1 PE=1 SV=4	QTCDLDTLESLLLTAADR	2033.99	2033.99	-0.0044	33.59
55	UGGG1_MOUSE	UDP-glucose:glycoprotein glucosyltransferase 1 OS=Mus musculus GN=Uggt1 PE=1 SV=4	QTCDLDTLESLLLTAADR	2033.99	2033.99	-0.0038	90.06
55	UGGG1_MOUSE	UDP-glucose:glycoprotein glucosyltransferase 1 OS=Mus musculus GN=Uggt1 PE=1 SV=4	QTCDLDTLESLLLTAADR	2033.99	2033.99	-0.0034	119.23
55	UGGG1_MOUSE	UDP-glucose:glycoprotein glucosyltransferase 1 OS=Mus musculus GN=Uggt1 PE=1 SV=4	DFNLDGAPYGYTPFCDSR	2093.88	2093.88	-0.0038	70.21
55	UGGG1_MOUSE	UDP-glucose:glycoprotein glucosyltransferase 1 OS=Mus musculus GN=Uggt1 PE=1 SV=4	DFNLDGAPYGYTPFCDSR	2093.88	2093.88	-0.0031	99.89
55	UGGG1_MOUSE	UDP-glucose:glycoprotein glucosyltransferase 1 OS=Mus musculus GN=Uggt1 PE=1 SV=4	QTCDLDTLESLLLTAADRPK	2259.14	2259.14	-0.0027	48.5
55	UGGG1_MOUSE	UDP-glucose:glycoprotein glucosyltransferase 1 OS=Mus musculus GN=Uggt1 PE=1 SV=4	QTCDLDTLESLLLTAADRPK	2259.14	2259.14	-0.0014	27.86
56	ADT2_MOUSE	UDP-glucose:glycoprotein glucosyltransferase 1 OS=Mus musculus GN=Uggt1 PE=1 SV=4	QTCDLDTLESLLLTAADRPKPLLFK	2857.53	2857.53	-0.0008	33.57
56	ADT2_MOUSE	ADP/ATP translocase 2 OS=Mus musculus GN=Slc25a5 PE=1 SV=3	YFAGNLASGGAAGATSLCFVYPLDFAR	2795.33	2795.34	-0.0051	92.22
56	ADT2_MOUSE	ADP/ATP translocase 2 OS=Mus musculus GN=Slc25a5 PE=1 SV=3	YFAGNLASGGAAGATSLCFVYPLDFAR	2795.33	2795.34	-0.0045	39.75
56	ADT2_MOUSE	ADP/ATP translocase 2 OS=Mus musculus GN=Slc25a5 PE=1 SV=3	YFAGNLASGGAAGATSLCFVYPLDFAR	2795.33	2795.34	-0.0041	114.57
56	ADT2_MOUSE	ADP/ATP translocase 2 OS=Mus musculus GN=Slc25a5 PE=1 SV=3	YFAGNLASGGAAGATSLCFVYPLDFAR	2795.34	2795.34	-0.0015	62.14
56	ADT2_MOUSE	ADP/ATP translocase 2 OS=Mus musculus GN=Slc25a5 PE=1 SV=3	YFAGNLASGGAAGATSLCFVYPLDFAR	2795.34	2795.34	-0.0004	77.41
57	PEBP1_MOUSE	ADP/ATP translocase 2 OS=Mus musculus GN=Slc25a5 PE=1 SV=3	TDAAVSFAKDFLAGGVAAAISKTAVAPIER	2988.59	2988.59	-0.0052	78.72
57	PEBP1_MOUSE	Phosphatidylethanolamine-binding protein 1 OS=Mus musculus GN=Pebp1 PE=1 SV=3	YNLGAPVAGTCYQAEWDDYVPK	2516.13	2516.13	-0.0053	67.51
57	PEBP1_MOUSE	Phosphatidylethanolamine-binding protein 1 OS=Mus musculus GN=Pebp1 PE=1 SV=3	YNLGAPVAGTCYQAEWDDYVPK	2516.13	2516.13	-0.0026	61.4
57	PEBP1_MOUSE	Phosphatidylethanolamine-binding protein 1 OS=Mus musculus GN=Pebp1 PE=1 SV=3	YVWLVYEQEQPLSCDEPILSNK	2709.3	2709.3	-0.0043	54.51
57	PEBP1_MOUSE	Phosphatidylethanolamine-binding protein 1 OS=Mus musculus GN=Pebp1 PE=1 SV=3	YVWLVYEQEQPLSCDEPILSNK	2709.3	2709.3	-0.0036	73.86
57	PEBP1_MOUSE	Phosphatidylethanolamine-binding protein 1 OS=Mus musculus GN=Pebp1 PE=1 SV=3	YVWLVYEQEQPLSCDEPILSNK	2709.3	2709.3	-0.0023	51.84
57	PEBP1_MOUSE	Phosphatidylethanolamine-binding protein 1 OS=Mus musculus GN=Pebp1 PE=1 SV=3	AADISQWAGPLCLQEVDEPPQHALR	2842.37	2842.37	-0.0047	63.88
57	PEBP1_MOUSE	Phosphatidylethanolamine-binding protein 1 OS=Mus musculus GN=Pebp1 PE=1 SV=3	AADISQWAGPLCLQEVDEPPQHALR	2842.37	2842.37	-0.0023	63.66
58	H31_MOUSE	Phosphatidylethanolamine-binding protein 1 OS=Mus musculus GN=Pebp1 PE=1 SV=3	AADISQWAGPLCLQEVDEPPQHALR	2842.37	2842.37	-0.0001	50.8
58	H31_MOUSE	Histone H3.1 OS=Mus musculus GN=Hist1h3a PE=1 SV=2	FQSSAVMALQEACEAYLVGLFEDTNLCAIHAK	3528.69	3528.67	0.0133	50.69
58	H31_MOUSE	Histone H3.1 OS=Mus musculus GN=Hist1h3a PE=1 SV=2	FQSSAVMALQEACEAYLVGLFEDTNLCAIHAK	3528.69	3528.67	0.0137	48.74
58	H31_MOUSE	Histone H3.1 OS=Mus musculus GN=Hist1h3a PE=1 SV=2	FQSSAVMALQEACEAYLVGLFEDTNLCAIHAK	3528.69	3528.67	0.0147	37.44
58	H31_MOUSE	Histone H3.1 OS=Mus musculus GN=Hist1h3a PE=1 SV=2	FQSSAVMALQEACEAYLVGLFEDTNLCAIHAK	3528.69	3528.67	0.0152	26.95
58	H31_MOUSE	Histone H3.1 OS=Mus musculus GN=Hist1h3a PE=1 SV=2	FQSSAVMALQEACEAYLVGLFEDTNLCAIHAK	3528.69	3528.67	0.0159	27.6
58	H31_MOUSE	Histone H3.1 OS=Mus musculus GN=Hist1h3a PE=1 SV=2	FQSSAVMALQEACEAYLVGLFEDTNLCAIHAK	3585.69	3585.69	-0.0067	59.62
58	H31_MOUSE	Histone H3.1 OS=Mus musculus GN=Hist1h3a PE=1 SV=2	FQSSAVMALQEACEAYLVGLFEDTNLCAIHAK	3585.69	3585.69	-0.0063	39.55
58	H31_MOUSE	Histone H3.1 OS=Mus musculus GN=Hist1h3a PE=1 SV=2	FQSSAVMALQEACEAYLVGLFEDTNLCAIHAK	3585.69	3585.69	-0.0056	66.87
58	H31_MOUSE	Histone H3.1 OS=Mus musculus GN=Hist1h3a PE=1 SV=2	FQSSAVMALQEACEAYLVGLFEDTNLCAIHAK	3585.71	3585.69	0.0153	21.33
58	H31_MOUSE	Histone H3.1 OS=Mus musculus GN=Hist1h3a PE=1 SV=2	FQSSAVMALQEACEAYLVGLFEDTNLCAIHAK	3601.68	3601.69	-0.0066	85.85
58	H31_MOUSE	Histone H3.1 OS=Mus musculus GN=Hist1h3a PE=1 SV=2	FQSSAVMALQEACEAYLVGLFEDTNLCAIHAK	3601.68	3601.69	-0.006	46.59
59	GMPPB_MOUSE	Histone H3.1 OS=Mus musculus GN=Hist1h3a PE=1 SV=2	FQSSAVMALQEACEAYLVGLFEDTNLCAIHAK	3601.69	3601.69	-0.0029	69.88
59	GMPPB_MOUSE	Mannose-1-phosphate guanyltransferase beta OS=Mus musculus GN=Gmppb PE=2 SV=1	YGVVVCEADTGR	1324.61	1324.61	-0.002	52.68
59	GMPPB_MOUSE	Mannose-1-phosphate guanyltransferase beta OS=Mus musculus GN=Gmppb PE=2 SV=1	YGVVVCEADTGR	1324.61	1324.61	-0.0016	38.16
59	GMPPB_MOUSE	Mannose-1-phosphate guanyltransferase beta OS=Mus musculus GN=Gmppb PE=2 SV=1	SHSWLESCIVGWR	1615.75	1615.76	-0.0032	32.73
59	GMPPB_MOUSE	Mannose-1-phosphate guanyltransferase beta OS=Mus musculus GN=Gmppb PE=2 SV=1	SHSWLESCIVGWR	1615.75	1615.76	-0.0023	37.04
59	GMPPB_MOUSE	Mannose-1-phosphate guanyltransferase beta OS=Mus musculus GN=Gmppb PE=2 SV=1	SHSWLESCIVGWR	1615.75	1615.76	-0.0018	69.61
59	GMPPB_MOUSE	Mannose-1-phosphate guanyltransferase beta OS=Mus musculus GN=Gmppb PE=2 SV=1	SHSWLESCIVGWR	1615.75	1615.76	-0.0017	65.63
59	GMPPB_MOUSE	Mannose-1-phosphate guanyltransferase beta OS=Mus musculus GN=Gmppb PE=2 SV=1	DFLTGMCLFLQSLR	1699.84	1699.84	-0.0035	56.44
59	GMPPB_MOUSE	Mannose-1-phosphate guanyltransferase beta OS=Mus musculus GN=Gmppb PE=2 SV=1	DFLTGMCLFLQSLR	1699.84	1699.84	-0.0031	74.84
59	GMPPB_MOUSE	Mannose-1-phosphate guanyltransferase beta OS=Mus musculus GN=Gmppb PE=2 SV=1	DFLTGMCLFLQSLR	1699.84	1699.84	-0.003	41.75
60	SYAC_MOUSE	Mannose-1-phosphate guanyltransferase beta OS=Mus musculus GN=Gmppb PE=2 SV=1	IGQNCSIGPNVSLGPGVVVEDGVCIRR	2851.44	2851.44	-0.0023	74.02
60	SYAC_MOUSE	Alanine--tRNA ligase, cytoplasmic OS=Mus musculus GN=Aars PE=1 SV=1	ITCLCQVPQNAANR	1643.78	1643.79	-0.0029	65.64
60	SYAC_MOUSE	Alanine--tRNA ligase, cytoplasmic OS=Mus musculus GN=Aars PE=1 SV=1	ITCLCQVPQNAANR	1643.78	1643.79	-0.0024	33.19
60	SYAC_MOUSE	Alanine--tRNA ligase, cytoplasmic OS=Mus musculus GN=Aars PE=1 SV=1	ITCLCQVPQNAANR	1643.79	1643.79	-0.0017	62.67
60	SYAC_MOUSE	Alanine--tRNA ligase, cytoplasmic OS=Mus musculus GN=Aars PE=1 SV=1	NVGCLQEALQLATSFAQLR	2118.09	2118.09	-0.0031	88.23
60	SYAC_MOUSE	Alanine--tRNA ligase, cytoplasmic OS=Mus musculus GN=Aars PE=1 SV=1	NVGCLQEALQLATSFAQLR	2118.09	2118.09	-0.003	48.86
60	SYAC_MOUSE	Alanine--tRNA ligase, cytoplasmic OS=Mus musculus GN=Aars PE=1 SV=1	NVGCLQEALQLATSFAQLR	2118.09	2118.09	-0.0026	46.1
60	SYAC_MOUSE	Alanine--tRNA ligase, cytoplasmic OS=Mus musculus GN=Aars PE=1 SV=1	NVGCLQEALQLATSFAQLR	2118.09	2118.09	-0.0021	81.54
60	SYAC_MOUSE	Alanine--tRNA ligase, cytoplasmic OS=Mus musculus GN=Aars PE=1 SV=1	YNYQSDSSGSYVFECTVATVLALR	2729.26	2729.26	-0.0045	54.98
61	TNPO1_MOUSE	Alanine--tRNA ligase, cytoplasmic OS=Mus musculus GN=Aars PE=1 SV=1	YNYQSDSSGSYVFECTVATVLALR	2729.26	2729.26	-0.0034	50.94
61	TNPO1_MOUSE	Transportin-1 OS=Mus musculus GN=Tnpo1 PE=1 SV=2	SITCWTLSR	1122.55	1122.55	-0.002	37.81
61	TNPO1_MOUSE	Transportin-1 OS=Mus musculus GN=Tnpo1 PE=1 SV=2	SHAVACVNQFIISR	1600.81	1600.81	-0.0015	53.77
61	TNPO1_MOUSE	Transportin-1 OS=Mus musculus GN=Tnpo1 PE=1 SV=2	SECLNNIGDSSPLIRATVGILITTIASK	2942.58	2942.57	0.0025	53.06
61	TNPO1_MOUSE	Transportin-1 OS=Mus musculus GN=Tnpo1 PE=1 SV=2	LGYVCPQEVAPMLQQFIRPWCTSLR	3048.51	3048.51	-0.0021	42.27
61	TNPO1_MOUSE	Transportin-1 OS=Mus musculus GN=Tnpo1 PE=1 SV=2	LGYVCPQEVAPMLQQFIRPWCTSLR	3048.51	3048.51	-0.0015	37.19
61	TNPO1_MOUSE	Transportin-1 OS=Mus musculus GN=Tnpo1 PE=1 SV=2	TQDQDENVALEACEFWLTLAEQPICK	3107.42	3107.42	-0.0052	48.59
61	TNPO1_MOUSE	Transportin-1 OS=Mus musculus GN=Tnpo1 PE=1 SV=2	TQDQDENVALEACEFWLTLAEQPICK	3107.42	3107.42	-0.0037	59.16
61	TNPO1_MOUSE	Transportin-1 OS=Mus musculus GN=Tnpo1 PE=1 SV=2	TQDQDENVALEACEFWLTLAEQPICKDVLVR	3689.76	3689.77	-0.0088	73.07
61	TNPO1_MOUSE	Transportin-1 OS=Mus musculus GN=Tnpo1 PE=1 SV=2	TQDQDENVALEACEFWLTLAEQPICKDVLVR	3689.76	3689.77	-0.0084	82.96
62	1433T_MOUSE	Transportin-1 OS=Mus musculus GN=Tnpo1 PE=1 SV=2	TQDQDENVALEACEFWLTLAEQPICKDVLVR	3689.77	3689.77	0.0044	58.49
62	1433T_MOUSE	14-3-3 protein theta OS=Mus musculus GN=Ywhaq PE=1 SV=1	YLAEVACGDDR	1267.55	1267.55	-0.0026	61.87
62	1433T_MOUSE	14-3-3 protein theta OS=Mus musculus GN=Ywhaq PE=1 SV=1	YLAEVACGDDR	1267.55	1267.55	-0.0025	56.54
62	1433T_MOUSE	14-3-3 protein theta OS=Mus musculus GN=Ywhaq PE=1 SV=1	SICTTVLELLDK	1390.74	1390.74	-0.0017	64.2
62	1433T_MOUSE	14-3-3 protein theta OS=Mus musculus GN=Ywhaq PE=1 SV=1	SICTTVLELLDK	1390.74	1390.74	-0.0007	68.86
62	1433T_MOUSE	14-3-3 protein theta OS=Mus musculus GN=Ywhaq PE=1 SV=1	YLAEVACGDDRK	1395.64	1395.65	-0.0016	47.04
62	1433T_MOUSE	14-3-3 protein theta OS=Mus musculus GN=Ywhaq PE=1 SV=1	YLAEVACGDDRK	1395.64	1395.65	-0.0013	20.22
62	1433T_MOUSE	14-3-3 protein theta OS=Mus musculus GN=Ywhaq PE=1 SV=1	YLAEVACGDDRK	1395.64	1395.65	-0.0011	54.59
62	1433T_MOUSE	14-3-3 protein theta OS=Mus musculus GN=Ywhaq PE=1 SV=1	SICTTVLELLDKYLIANATNPESK	2692.39	2692.4	-0.0043	53.56
62	1433T_MOUSE	14-3-3 protein theta OS=Mus musculus GN=Ywhaq PE=1 SV=1	SICTTVLELLDKYLIANATNPESK	2692.4	2692.4	-0.0038	50.51
62	1433T_MOUSE	14-3-3 protein theta OS=Mus musculus GN=Ywhaq PE=1 SV=1	SICTTVLELLDKYLIANATNPESK	2692.4	2692.4	-0.0028	41.97
63	RL30_MOUSE	14-3-3 protein theta OS=Mus musculus GN=Ywhaq PE=1 SV=1	SICTTVLELLDKYLIANATNPESK	2692.4	2692.4	-0.0026	51.39
63	RL30_MOUSE	60S ribosomal protein L30 OS=Mus musculus GN=Rpl30 PE=2 SV=2	LVILANNCPALR	1352.76	1352.76	-0.003	52.94
63	RL30_MOUSE	60S ribosomal protein L30 OS=Mus musculus GN=Rpl30 PE=2 SV=2	LVILANNCPALR	1352.76	1352.76	-0.0026	53.58
63	RL30_MOUSE	60S ribosomal protein L30 OS=Mus musculus GN=Rpl30 PE=2 SV=2	VCTLAIIDPGDSDIIR	1756.9	1756.9	-0.0025	81.98
63	RL30_MOUSE	60S ribosomal protein L30 OS=Mus musculus GN=Rpl30 PE=2 SV=2	VCTLAIIDPGDSDIIR	1756.9	1756.9	-0.0022	82
63	RL30_MOUSE	60S ribosomal protein L30 OS=Mus musculus GN=Rpl30 PE=2 SV=2	TGVHHYSGNNIELGTACGK	2013.93	2013.93	-0.0035	38.89
63	RL30_MOUSE	60S ribosomal protein L30 OS=Mus musculus GN=Rpl30 PE=2 SV=2	TGVHHYSGNNIELGTACGK	2013.93	2013.93	-0.0033	82.84
64	GBB2_MOUSE	60S ribosomal protein L30 OS=Mus musculus GN=Rpl30 PE=2 SV=2	TGVHHYSGNNIELGTACGK	2013.93	2013.93	-0.0028	86.61
64	GBB2_MOUSE	Guanine nucleotide-binding protein G(I)/G(S)/G(T) subunit beta-2 OS=Mus musculus GN=Gnb2 PE=1 SV=3	TFVSGACDASIK	1254.59	1254.59	-0.0018	54.33
64	GBB2_MOUSE	Guanine nucleotide-binding protein G(I)/G(S)/G(T) subunit beta-2 OS=Mus musculus GN=Gnb2 PE=1 SV=3	ELPGHTGYLSCCR	1548.68	1548.68	-0.0027	42.68
64	GBB2_MOUSE	Guanine nucleotide-binding protein G(I)/G(S)/G(T) subunit beta-2 OS=Mus musculus GN=Gnb2 PE=1 SV=3	ELPGHTGYLSCCR	1548.68	1548.68	-0.0026	21.86
64	GBB2_MOUSE	Guanine nucleotide-binding protein G(I)/G(S)/G(T) subunit beta-2 OS=Mus musculus GN=Gnb2 PE=1 SV=3	ELPGHTGYLSCCR	1548.68	1548.68	-0.0024	24.9
64	GBB2_MOUSE	Guanine nucleotide-binding protein G(I)/G(S)/G(T) subunit beta-2 OS=Mus musculus GN=Gnb2 PE=1 SV=3	ACGDSTLTQITAGLDPVGR	1930.94	1930.94	-0.0033	87.23
64	GBB2_MOUSE	Guanine nucleotide-binding protein G(I)/G(S)/G(T) subunit beta-2 OS=Mus musculus GN=Gnb2 PE=1 SV=3	ACGDSTLTQITAGLDPVGR	1930.94	1930.94	-0.0011	79.04
64	GBB2_MOUSE	Guanine nucleotide-binding protein G(I)/G(S)/G(T) subunit beta-2 OS=Mus musculus GN=Gnb2 PE=1 SV=3	LLLAGYDDFNCNIWDAMK	2157.98	2157.99	-0.0038	81.08
64	GBB2_MOUSE	Guanine nucleotide-binding protein G(I)/G(S)/G(T) subunit beta-2 OS=Mus musculus GN=Gnb2 PE=1 SV=3	SSWVMTCAYAPSGNFVACGGLDNICSIYSLK	3427.53	3427.53	-0.0088	50.47
65	DNPEP_MOUSE	Guanine nucleotide-binding protein G(I)/G(S)/G(T) subunit beta-2 OS=Mus musculus GN=Gnb2 PE=1 SV=3	QTFIGHESDINAVAFFPNGYAFTTGSDDATCR	3508.55	3508.56	-0.012	62.01
65	DNPEP_MOUSE	Aspartyl aminopeptidase OS=Mus musculus GN=Dnpep PE=2 SV=2	SPSPFHVVAECR	1384.65	1384.66	-0.002	54.01
65	DNPEP_MOUSE	Aspartyl aminopeptidase OS=Mus musculus GN=Dnpep PE=2 SV=2	NDSPCGTTIGPILASR	1657.81	1657.81	-0.0026	48.47
65	DNPEP_MOUSE	Aspartyl aminopeptidase OS=Mus musculus GN=Dnpep PE=2 SV=2	NDSPCGTTIGPILASR	1657.81	1657.81	-0.0025	37.15
65	DNPEP_MOUSE	Aspartyl aminopeptidase OS=Mus musculus GN=Dnpep PE=2 SV=2	ETACTTGVLQTLTLFK	1781.92	1781.92	-0.0031	58.37
65	DNPEP_MOUSE	Aspartyl aminopeptidase OS=Mus musculus GN=Dnpep PE=2 SV=2	ETACTTGVLQTLTLFK	1781.92	1781.92	-0.0013	64.34
65	DNPEP_MOUSE	Aspartyl aminopeptidase OS=Mus musculus GN=Dnpep PE=2 SV=2	LDNLHSCFCALQALIDSCASPASLAR	2889.36	2889.36	-0.002	74.26
65	DNPEP_MOUSE	Aspartyl aminopeptidase OS=Mus musculus GN=Dnpep PE=2 SV=2	LDNLHSCFCALQALIDSCASPASLAR	2889.36	2889.36	0.0001	58.15
66	RL12_MOUSE	Aspartyl aminopeptidase OS=Mus musculus GN=Dnpep PE=2 SV=2	NSSSIIAFAVGGQYVPGNGFSLIGAHTDSPCLR	3391.66	3391.66	-0.0036	97.05
66	RL12_MOUSE	60S ribosomal protein L12 OS=Mus musculus GN=Rpl12 PE=1 SV=2	CTGGEVGATSALAPK	1417.68	1417.69	-0.003	81.69
66	RL12_MOUSE	60S ribosomal protein L12 OS=Mus musculus GN=Rpl12 PE=1 SV=2	CTGGEVGATSALAPK	1417.68	1417.69	-0.0025	86.29
66	RL12_MOUSE	60S ribosomal protein L12 OS=Mus musculus GN=Rpl12 PE=1 SV=2	EILGTAQSVGCNVDGR	1674.8	1674.8	-0.0031	76.79
66	RL12_MOUSE	60S ribosomal protein L12 OS=Mus musculus GN=Rpl12 PE=1 SV=2	HPHDIIDDINSGAVECPAS	2045.91	2045.91	-0.0042	59.16
66	RL12_MOUSE	60S ribosomal protein L12 OS=Mus musculus GN=Rpl12 PE=1 SV=2	HPHDIIDDINSGAVECPAS	2045.91	2045.91	-0.0039	62.45
66	RL12_MOUSE	60S ribosomal protein L12 OS=Mus musculus GN=Rpl12 PE=1 SV=2	HPHDIIDDINSGAVECPAS	2045.91	2045.91	-0.0032	39.34
67	COF1_MOUSE	60S ribosomal protein L12 OS=Mus musculus GN=Rpl12 PE=1 SV=2	HPHDIIDDINSGAVECPAS	2045.91	2045.91	-0.003	40.51
67	COF1_MOUSE	Cofilin-1 OS=Mus musculus GN=Cfl1 PE=1 SV=3	AVLFCLSEDK	1180.58	1180.58	-0.0027	57.79
67	COF1_MOUSE	Cofilin-1 OS=Mus musculus GN=Cfl1 PE=1 SV=3	AVLFCLSEDK	1180.58	1180.58	-0.0022	53.88
67	COF1_MOUSE	Cofilin-1 OS=Mus musculus GN=Cfl1 PE=1 SV=3	AVLFCLSEDKK	1308.67	1308.67	-0.0027	60.26
67	COF1_MOUSE	Cofilin-1 OS=Mus musculus GN=Cfl1 PE=1 SV=3	AVLFCLSEDKK	1308.67	1308.67	-0.0021	37.84
67	COF1_MOUSE	Cofilin-1 OS=Mus musculus GN=Cfl1 PE=1 SV=3	AVLFCLSEDKK	1308.67	1308.67	-0.0019	44.06
67	COF1_MOUSE	Cofilin-1 OS=Mus musculus GN=Cfl1 PE=1 SV=3	HELQANCYEEVK	1518.68	1518.68	-0.0014	66.65
67	COF1_MOUSE	Cofilin-1 OS=Mus musculus GN=Cfl1 PE=1 SV=3	HELQANCYEEVKDR	1789.8	1789.81	-0.0032	51.08
67	COF1_MOUSE	Cofilin-1 OS=Mus musculus GN=Cfl1 PE=1 SV=3	HELQANCYEEVKDR	1789.8	1789.81	-0.0029	49.43
68	CAND1_MOUSE	Cofilin-1 OS=Mus musculus GN=Cfl1 PE=1 SV=3	HELQANCYEEVKDR	1789.8	1789.81	-0.0019	62.92
68	CAND1_MOUSE	Cullin-associated NEDD8-dissociated protein 1 OS=Mus musculus GN=Cand1 PE=2 SV=2	CVAALTR	789.416	789.417	-0.0009	35.35
68	CAND1_MOUSE	Cullin-associated NEDD8-dissociated protein 1 OS=Mus musculus GN=Cand1 PE=2 SV=2	NVVAECLGK	988.499	988.501	-0.002	34.21
68	CAND1_MOUSE	Cullin-associated NEDD8-dissociated protein 1 OS=Mus musculus GN=Cand1 PE=2 SV=2	NVVAECLGK	988.499	988.501	-0.0019	20.13
68	CAND1_MOUSE	Cullin-associated NEDD8-dissociated protein 1 OS=Mus musculus GN=Cand1 PE=2 SV=2	NVVAECLGK	988.499	988.501	-0.0018	37.68
68	CAND1_MOUSE	Cullin-associated NEDD8-dissociated protein 1 OS=Mus musculus GN=Cand1 PE=2 SV=2	NVVAECLGK	988.5	988.501	-0.0015	31.32
68	CAND1_MOUSE	Cullin-associated NEDD8-dissociated protein 1 OS=Mus musculus GN=Cand1 PE=2 SV=2	CLDAVVSTR	1019.5	1019.51	-0.0023	20.49
68	CAND1_MOUSE	Cullin-associated NEDD8-dissociated protein 1 OS=Mus musculus GN=Cand1 PE=2 SV=2	CLDAVVSTR	1019.5	1019.51	-0.0022	42.37
68	CAND1_MOUSE	Cullin-associated NEDD8-dissociated protein 1 OS=Mus musculus GN=Cand1 PE=2 SV=2	TYIQCIAAISR	1294.67	1294.67	-0.0025	61.97
68	CAND1_MOUSE	Cullin-associated NEDD8-dissociated protein 1 OS=Mus musculus GN=Cand1 PE=2 SV=2	TYIQCIAAISR	1294.67	1294.67	-0.0019	57.17
68	CAND1_MOUSE	Cullin-associated NEDD8-dissociated protein 1 OS=Mus musculus GN=Cand1 PE=2 SV=2	NVVAECLGKLTLIDPETLLPR	2350.29	2350.29	-0.0038	46.61
68	CAND1_MOUSE	Cullin-associated NEDD8-dissociated protein 1 OS=Mus musculus GN=Cand1 PE=2 SV=2	NVVAECLGKLTLIDPETLLPR	2350.29	2350.29	-0.0027	38.01
68	CAND1_MOUSE	Cullin-associated NEDD8-dissociated protein 1 OS=Mus musculus GN=Cand1 PE=2 SV=2	QGGLLVNFHPSILTCLLPQLTSPR	2660.44	2660.45	-0.0063	71.48
69	MCM3_MOUSE	Cullin-associated NEDD8-dissociated protein 1 OS=Mus musculus GN=Cand1 PE=2 SV=2	QGGLLVNFHPSILTCLLPQLTSPR	2660.44	2660.45	-0.0041	82.47
69	MCM3_MOUSE	DNA replication licensing factor MCM3 OS=Mus musculus GN=Mcm3 PE=1 SV=2	YVLCTAPR	978.494	978.496	-0.0018	37.95
69	MCM3_MOUSE	DNA replication licensing factor MCM3 OS=Mus musculus GN=Mcm3 PE=1 SV=2	TVLIACNVK	1016.57	1016.57	-0.002	31.77
69	MCM3_MOUSE	DNA replication licensing factor MCM3 OS=Mus musculus GN=Mcm3 PE=1 SV=2	TVLIACNVK	1016.57	1016.57	-0.0012	25.28
69	MCM3_MOUSE	DNA replication licensing factor MCM3 OS=Mus musculus GN=Mcm3 PE=1 SV=2	AILCLLLGGVER	1312.75	1312.75	-0.0019	65.17
69	MCM3_MOUSE	DNA replication licensing factor MCM3 OS=Mus musculus GN=Mcm3 PE=1 SV=2	AILCLLLGGVER	1312.75	1312.75	-0.0015	59.1
69	MCM3_MOUSE	DNA replication licensing factor MCM3 OS=Mus musculus GN=Mcm3 PE=1 SV=2	CSVLAAANPVYGR	1376.68	1376.69	-0.0021	77.67
69	MCM3_MOUSE	DNA replication licensing factor MCM3 OS=Mus musculus GN=Mcm3 PE=1 SV=2	CSVLAAANPVYGR	1376.69	1376.69	-0.0015	71.42
69	MCM3_MOUSE	DNA replication licensing factor MCM3 OS=Mus musculus GN=Mcm3 PE=1 SV=2	TLTSCFLSCVVCVEGIVTK	2172.06	2172.06	-0.0025	90.05
70	HSP7C_MOUSE	DNA replication licensing factor MCM3 OS=Mus musculus GN=Mcm3 PE=1 SV=2	TLTSCFLSCVVCVEGIVTK	2172.06	2172.06	-0.002	47.83
70	HSP7C_MOUSE	Heat shock cognate 71 kDa protein OS=Mus musculus GN=Hspa8 PE=1 SV=1	VCNPIITK	943.514	943.516	-0.0018	24.87
70	HSP7C_MOUSE	Heat shock cognate 71 kDa protein OS=Mus musculus GN=Hspa8 PE=1 SV=1	VCNPIITK	943.514	943.516	-0.0018	34.67
70	HSP7C_MOUSE	Heat shock cognate 71 kDa protein OS=Mus musculus GN=Hspa8 PE=1 SV=1	VCNPIITK	943.515	943.516	-0.0015	22
70	HSP7C_MOUSE	Heat shock cognate 71 kDa protein OS=Mus musculus GN=Hspa8 PE=1 SV=1	CNEIISWLDK	1276.61	1276.61	-0.0021	56.61
70	HSP7C_MOUSE	Heat shock cognate 71 kDa protein OS=Mus musculus GN=Hspa8 PE=1 SV=1	CNEIISWLDK	1276.61	1276.61	-0.0017	56.19
70	HSP7C_MOUSE	Heat shock cognate 71 kDa protein OS=Mus musculus GN=Hspa8 PE=1 SV=1	GPAVGIDLGTTYSCVGVFQHGK	2262.11	2262.11	-0.0033	83.94
70	HSP7C_MOUSE	Heat shock cognate 71 kDa protein OS=Mus musculus GN=Hspa8 PE=1 SV=1	GPAVGIDLGTTYSCVGVFQHGK	2262.11	2262.11	-0.0026	88.38
70	HSP7C_MOUSE	Heat shock cognate 71 kDa protein OS=Mus musculus GN=Hspa8 PE=1 SV=1	GPAVGIDLGTTYSCVGVFQHGK	2262.11	2262.11	-0.0025	64.09
70	HSP7C_MOUSE	Heat shock cognate 71 kDa protein OS=Mus musculus GN=Hspa8 PE=1 SV=1	GPAVGIDLGTTYSCVGVFQHGK	2262.11	2262.11	-0.0024	57.8
71	IPO7_MOUSE	Heat shock cognate 71 kDa protein OS=Mus musculus GN=Hspa8 PE=1 SV=1	GPAVGIDLGTTYSCVGVFQHGK	2262.11	2262.11	-0.0024	35.73
71	IPO7_MOUSE	Importin-7 OS=Mus musculus GN=Ipo7 PE=1 SV=2	CLIDDR	790.363	790.364	-0.0014	40.1
71	IPO7_MOUSE	Importin-7 OS=Mus musculus GN=Ipo7 PE=1 SV=2	LLEVIILQCK	1227.72	1227.73	-0.0018	56.11
71	IPO7_MOUSE	Importin-7 OS=Mus musculus GN=Ipo7 PE=1 SV=2	GIDQCIPLFVEAALER	1829.93	1829.93	-0.0059	55.69
71	IPO7_MOUSE	Importin-7 OS=Mus musculus GN=Ipo7 PE=1 SV=2	GIDQCIPLFVEAALER	1829.93	1829.93	-0.004	86.9
71	IPO7_MOUSE	Importin-7 OS=Mus musculus GN=Ipo7 PE=1 SV=2	GIDQCIPLFVEAALER	1829.93	1829.93	-0.0034	59.68
71	IPO7_MOUSE	Importin-7 OS=Mus musculus GN=Ipo7 PE=1 SV=2	GIDQCIPLFVEAALER	1829.93	1829.93	-0.0022	50.42
71	IPO7_MOUSE	Importin-7 OS=Mus musculus GN=Ipo7 PE=1 SV=2	FDVFEDFISPTTAAQTLLFTACSK	2708.3	2708.3	-0.0034	56.69
71	IPO7_MOUSE	Importin-7 OS=Mus musculus GN=Ipo7 PE=1 SV=2	FDVFEDFISPTTAAQTLLFTACSK	2708.3	2708.3	-0.0021	61.91
72	MYH9_MOUSE	Importin-7 OS=Mus musculus GN=Ipo7 PE=1 SV=2	FPNNVEPVTNHFITQWLNDVDCFLGLHDR	3496.66	3496.66	-0.0051	24.21
72	MYH9_MOUSE	Myosin-9 OS=Mus musculus GN=Myh9 PE=1 SV=4	CQYLQAEK	1038.48	1038.48	-0.0022	28.63
72	MYH9_MOUSE	Myosin-9 OS=Mus musculus GN=Myh9 PE=1 SV=4	ADFCIIHYAGK	1293.61	1293.62	-0.0028	21.12
72	MYH9_MOUSE	Myosin-9 OS=Mus musculus GN=Myh9 PE=1 SV=4	ADFCIIHYAGK	1293.62	1293.62	-0.0021	32.62
72	MYH9_MOUSE	Myosin-9 OS=Mus musculus GN=Myh9 PE=1 SV=4	ADFCIIHYAGK	1293.62	1293.62	-0.0016	28.52
72	MYH9_MOUSE	Myosin-9 OS=Mus musculus GN=Myh9 PE=1 SV=4	EDQSILCTGESGAGK	1550.68	1550.69	-0.0032	50.94
72	MYH9_MOUSE	Myosin-9 OS=Mus musculus GN=Myh9 PE=1 SV=4	EDQSILCTGESGAGK	1550.69	1550.69	-0.0022	65.95
72	MYH9_MOUSE	Myosin-9 OS=Mus musculus GN=Myh9 PE=1 SV=4	PAGPPGILALLDEECWFPK	2109.06	2109.06	-0.0038	61.06
72	MYH9_MOUSE	Myosin-9 OS=Mus musculus GN=Myh9 PE=1 SV=4	PAGPPGILALLDEECWFPK	2109.06	2109.06	-0.0032	60.7
72	MYH9_MOUSE	Myosin-9 OS=Mus musculus GN=Myh9 PE=1 SV=4	PAGPPGILALLDEECWFPK	2109.06	2109.06	-0.002	70.54
73	G3P_MOUSE	Myosin-9 OS=Mus musculus GN=Myh9 PE=1 SV=4	PAGPPGILALLDEECWFPK	2109.06	2109.06	-0.002	87.3
73	G3P_MOUSE	Glyceraldehyde-3-phosphate dehydrogenase OS=Mus musculus GN=Gapdh PE=1 SV=2	VPTPNVSVVDLTCR	1555.8	1555.8	-0.0032	35.13
73	G3P_MOUSE	Glyceraldehyde-3-phosphate dehydrogenase OS=Mus musculus GN=Gapdh PE=1 SV=2	VPTPNVSVVDLTCR	1555.8	1555.8	-0.003	39.68
73	G3P_MOUSE	Glyceraldehyde-3-phosphate dehydrogenase OS=Mus musculus GN=Gapdh PE=1 SV=2	VPTPNVSVVDLTCR	1555.8	1555.8	-0.0027	87.49
73	G3P_MOUSE	Glyceraldehyde-3-phosphate dehydrogenase OS=Mus musculus GN=Gapdh PE=1 SV=2	VPTPNVSVVDLTCR	1555.8	1555.8	-0.0019	91.7
73	G3P_MOUSE	Glyceraldehyde-3-phosphate dehydrogenase OS=Mus musculus GN=Gapdh PE=1 SV=2	IVSNASCTTNCLAPLAK	1818.89	1818.9	-0.004	44.19
73	G3P_MOUSE	Glyceraldehyde-3-phosphate dehydrogenase OS=Mus musculus GN=Gapdh PE=1 SV=2	IVSNASCTTNCLAPLAK	1818.89	1818.9	-0.0035	26.02
73	G3P_MOUSE	Glyceraldehyde-3-phosphate dehydrogenase OS=Mus musculus GN=Gapdh PE=1 SV=2	IVSNASCTTNCLAPLAK	1818.89	1818.9	-0.0033	84.65
73	G3P_MOUSE	Glyceraldehyde-3-phosphate dehydrogenase OS=Mus musculus GN=Gapdh PE=1 SV=2	VPTPNVSVVDLTCRLEKPAK	2222.2	2222.21	-0.0048	23.81
74	ADT1_MOUSE	Glyceraldehyde-3-phosphate dehydrogenase OS=Mus musculus GN=Gapdh PE=1 SV=2	VPTPNVSVVDLTCRLEKPAK	2222.2	2222.21	-0.0048	26.16
74	ADT1_MOUSE	ADP/ATP translocase 1 OS=Mus musculus GN=Slc25a4 PE=1 SV=4	EFNGLGDCLTK	1252.57	1252.58	-0.0023	36.97
74	ADT1_MOUSE	ADP/ATP translocase 1 OS=Mus musculus GN=Slc25a4 PE=1 SV=4	YFAGNLASGGAAGATSLCFVYPLDFAR	2795.33	2795.34	-0.0051	92.22
74	ADT1_MOUSE	ADP/ATP translocase 1 OS=Mus musculus GN=Slc25a4 PE=1 SV=4	YFAGNLASGGAAGATSLCFVYPLDFAR	2795.33	2795.34	-0.0045	39.75
74	ADT1_MOUSE	ADP/ATP translocase 1 OS=Mus musculus GN=Slc25a4 PE=1 SV=4	YFAGNLASGGAAGATSLCFVYPLDFAR	2795.33	2795.34	-0.0041	114.57
74	ADT1_MOUSE	ADP/ATP translocase 1 OS=Mus musculus GN=Slc25a4 PE=1 SV=4	YFAGNLASGGAAGATSLCFVYPLDFAR	2795.34	2795.34	-0.0015	62.14
75	DDX5_MOUSE	ADP/ATP translocase 1 OS=Mus musculus GN=Slc25a4 PE=1 SV=4	YFAGNLASGGAAGATSLCFVYPLDFAR	2795.34	2795.34	-0.0004	77.41
75	DDX5_MOUSE	Probable ATP-dependent RNA helicase DDX5 OS=Mus musculus GN=Ddx5 PE=1 SV=2	STCIYGGAPK	1052.49	1052.5	-0.0022	47.6
75	DDX5_MOUSE	Probable ATP-dependent RNA helicase DDX5 OS=Mus musculus GN=Ddx5 PE=1 SV=2	STCIYGGAPK	1052.49	1052.5	-0.0016	50.94
75	DDX5_MOUSE	Probable ATP-dependent RNA helicase DDX5 OS=Mus musculus GN=Ddx5 PE=1 SV=2	LIDFLECGK	1093.55	1093.55	-0.0022	32.82
75	DDX5_MOUSE	Probable ATP-dependent RNA helicase DDX5 OS=Mus musculus GN=Ddx5 PE=1 SV=2	LIDFLECGK	1093.55	1093.55	-0.0017	45.41
75	DDX5_MOUSE	Probable ATP-dependent RNA helicase DDX5 OS=Mus musculus GN=Ddx5 PE=1 SV=2	GVEICIATPGR	1171.6	1171.6	-0.0022	58.1
75	DDX5_MOUSE	Probable ATP-dependent RNA helicase DDX5 OS=Mus musculus GN=Ddx5 PE=1 SV=2	GDGPICLVLAPTR	1367.72	1367.72	-0.0017	55.7
75	DDX5_MOUSE	Probable ATP-dependent RNA helicase DDX5 OS=Mus musculus GN=Ddx5 PE=1 SV=2	GDGPICLVLAPTR	1367.72	1367.72	-0.0014	64.87
75	DDX5_MOUSE	Probable ATP-dependent RNA helicase DDX5 OS=Mus musculus GN=Ddx5 PE=1 SV=2	ELAQQVQQVAAEYCR	1791.85	1791.86	-0.0045	66.12
76	PDIA6_MOUSE	Probable ATP-dependent RNA helicase DDX5 OS=Mus musculus GN=Ddx5 PE=1 SV=2	ELAQQVQQVAAEYCR	1791.86	1791.86	-0.0022	51.4
76	PDIA6_MOUSE	Protein disulfide-isomerase A6 OS=Mus musculus GN=Pdia6 PE=1 SV=3	TCEEHQLCVVAVLPHILDTGAAGR	2645.3	2645.31	-0.0052	58.39
76	PDIA6_MOUSE	Protein disulfide-isomerase A6 OS=Mus musculus GN=Pdia6 PE=1 SV=3	TCEEHQLCVVAVLPHILDTGAAGR	2645.3	2645.31	-0.0042	81.03
76	PDIA6_MOUSE	Protein disulfide-isomerase A6 OS=Mus musculus GN=Pdia6 PE=1 SV=3	TCEEHQLCVVAVLPHILDTGAAGR	2645.3	2645.31	-0.002	67.74
76	PDIA6_MOUSE	Protein disulfide-isomerase A6 OS=Mus musculus GN=Pdia6 PE=1 SV=3	KTCEEHQLCVVAVLPHILDTGAAGR	2773.39	2773.4	-0.0055	67.3
76	PDIA6_MOUSE	Protein disulfide-isomerase A6 OS=Mus musculus GN=Pdia6 PE=1 SV=3	KTCEEHQLCVVAVLPHILDTGAAGR	2773.4	2773.4	-0.0002	90.13
77	SYG_MOUSE	Protein disulfide-isomerase A6 OS=Mus musculus GN=Pdia6 PE=1 SV=3	KTCEEHQLCVVAVLPHILDTGAAGR	2773.4	2773.4	0.0002	71.43
77	SYG_MOUSE	Glycine--tRNA ligase OS=Mus musculus GN=Gars PE=1 SV=1	SCYDLSCHAR	1267.5	1267.51	-0.003	42.27
77	SYG_MOUSE	Glycine--tRNA ligase OS=Mus musculus GN=Gars PE=1 SV=1	SCYDLSCHAR	1267.5	1267.51	-0.0026	23.52
77	SYG_MOUSE	Glycine--tRNA ligase OS=Mus musculus GN=Gars PE=1 SV=1	SCYDLSCHAR	1267.51	1267.51	-0.0024	25.25
77	SYG_MOUSE	Glycine--tRNA ligase OS=Mus musculus GN=Gars PE=1 SV=1	TSYGWIEIVGCADR	1625.75	1625.75	-0.0029	95.75
77	SYG_MOUSE	Glycine--tRNA ligase OS=Mus musculus GN=Gars PE=1 SV=1	TSYGWIEIVGCADR	1625.75	1625.75	-0.0028	95.98
77	SYG_MOUSE	Glycine--tRNA ligase OS=Mus musculus GN=Gars PE=1 SV=1	TSYGWIEIVGCADR	1625.75	1625.75	-0.0019	77.36
78	H3C_MOUSE	Glycine--tRNA ligase OS=Mus musculus GN=Gars PE=1 SV=1	FQSVADLCLYLYSAK	1776.87	1776.88	-0.0008	72.97
78	H3C_MOUSE	Histone H3.3C OS=Mus musculus GN=H3f3c PE=3 SV=3	FQSAAIGALQEASEAYLVGLFEDTNLCAIHAK	3436.69	3436.7	-0.0052	97.7
78	H3C_MOUSE	Histone H3.3C OS=Mus musculus GN=H3f3c PE=3 SV=3	FQSAAIGALQEASEAYLVGLFEDTNLCAIHAK	3436.69	3436.7	-0.0035	93.39
78	H3C_MOUSE	Histone H3.3C OS=Mus musculus GN=H3f3c PE=3 SV=3	FQSAAIGALQEASEAYLVGLFEDTNLCAIHAK	3436.69	3436.7	-0.0032	72.52
78	H3C_MOUSE	Histone H3.3C OS=Mus musculus GN=H3f3c PE=3 SV=3	FQSAAIGALQEASEAYLVGLFEDTNLCAIHAK	3436.69	3436.7	-0.003	74.16
79	SYWC_MOUSE	Histone H3.3C OS=Mus musculus GN=H3f3c PE=3 SV=3	FQSAAIGALQEASEAYLVGLFEDTNLCAIHAK	3436.69	3436.7	-0.003	48.53
79	SYWC_MOUSE	Tryptophan--tRNA ligase, cytoplasmic OS=Mus musculus GN=Wars PE=1 SV=2	AGCPPGNPTAGR	1153.53	1153.53	-0.0017	29.43
79	SYWC_MOUSE	Tryptophan--tRNA ligase, cytoplasmic OS=Mus musculus GN=Wars PE=1 SV=2	AGCPPGNPTAGR	1153.53	1153.53	-0.0017	37.12
79	SYWC_MOUSE	Tryptophan--tRNA ligase, cytoplasmic OS=Mus musculus GN=Wars PE=1 SV=2	DIIACGFDINK	1264.61	1264.61	-0.0029	50.03
79	SYWC_MOUSE	Tryptophan--tRNA ligase, cytoplasmic OS=Mus musculus GN=Wars PE=1 SV=2	DIIACGFDINK	1264.61	1264.61	-0.002	48.06
79	SYWC_MOUSE	Tryptophan--tRNA ligase, cytoplasmic OS=Mus musculus GN=Wars PE=1 SV=2	GIFGFTDSDCIGK	1415.64	1415.64	-0.0016	37.72
79	SYWC_MOUSE	Tryptophan--tRNA ligase, cytoplasmic OS=Mus musculus GN=Wars PE=1 SV=2	GIFGFTDSDCIGK	1415.64	1415.64	-0.0014	53.62
79	SYWC_MOUSE	Tryptophan--tRNA ligase, cytoplasmic OS=Mus musculus GN=Wars PE=1 SV=2	TDIQCLIPCAIDQDPYFR	2224.03	2224.03	-0.004	43.41
79	SYWC_MOUSE	Tryptophan--tRNA ligase, cytoplasmic OS=Mus musculus GN=Wars PE=1 SV=2	TDIQCLIPCAIDQDPYFR	2224.03	2224.03	-0.0028	45.26
79	SYWC_MOUSE	Tryptophan--tRNA ligase, cytoplasmic OS=Mus musculus GN=Wars PE=1 SV=2	TDIQCLIPCAIDQDPYFR	2224.03	2224.03	-0.0018	43.97
79	SYWC_MOUSE	Tryptophan--tRNA ligase, cytoplasmic OS=Mus musculus GN=Wars PE=1 SV=2	TDIQCLIPCAIDQDPYFR	2224.03	2224.03	-0.0014	42.39
79	SYWC_MOUSE	Tryptophan--tRNA ligase, cytoplasmic OS=Mus musculus GN=Wars PE=1 SV=2	DRTDIQCLIPCAIDQDPYFR	2495.15	2495.16	-0.0035	45.68
79	SYWC_MOUSE	Tryptophan--tRNA ligase, cytoplasmic OS=Mus musculus GN=Wars PE=1 SV=2	DRTDIQCLIPCAIDQDPYFR	2495.15	2495.16	-0.0031	31.53
80	AT1A1_MOUSE	Tryptophan--tRNA ligase, cytoplasmic OS=Mus musculus GN=Wars PE=1 SV=2	DLTLEQAYSYTVENAKDIIACGFDINK	3090.49	3090.49	0.0024	44.87
80	AT1A1_MOUSE	Sodium/potassium-transporting ATPase subunit alpha-1 OS=Mus musculus GN=Atp1a1 PE=1 SV=1	IAGLCNR	802.41	802.412	-0.0018	29.43
80	AT1A1_MOUSE	Sodium/potassium-transporting ATPase subunit alpha-1 OS=Mus musculus GN=Atp1a1 PE=1 SV=1	CSSILLHGK	1013.53	1013.53	-0.0022	52.42
80	AT1A1_MOUSE	Sodium/potassium-transporting ATPase subunit alpha-1 OS=Mus musculus GN=Atp1a1 PE=1 SV=1	CSSILLHGK	1013.53	1013.53	-0.0021	52.37
80	AT1A1_MOUSE	Sodium/potassium-transporting ATPase subunit alpha-1 OS=Mus musculus GN=Atp1a1 PE=1 SV=1	ACVVHGSDLK	1084.53	1084.53	-0.0016	45.25
80	AT1A1_MOUSE	Sodium/potassium-transporting ATPase subunit alpha-1 OS=Mus musculus GN=Atp1a1 PE=1 SV=1	LIIVEGCQR	1086.58	1086.59	-0.0027	41.43
80	AT1A1_MOUSE	Sodium/potassium-transporting ATPase subunit alpha-1 OS=Mus musculus GN=Atp1a1 PE=1 SV=1	LIIVEGCQR	1086.58	1086.59	-0.0023	37.68
80	AT1A1_MOUSE	Sodium/potassium-transporting ATPase subunit alpha-1 OS=Mus musculus GN=Atp1a1 PE=1 SV=1	NIAFFSTNCVEGTAR	1685.78	1685.78	-0.0024	70.22
80	AT1A1_MOUSE	Sodium/potassium-transporting ATPase subunit alpha-1 OS=Mus musculus GN=Atp1a1 PE=1 SV=1	NLEAVETLGSTSTICSDK	1923.9	1923.91	-0.005	45.77
80	AT1A1_MOUSE	Sodium/potassium-transporting ATPase subunit alpha-1 OS=Mus musculus GN=Atp1a1 PE=1 SV=1	IAGLCNRAVFQANQENLPILK	2368.27	2368.27	-0.0013	48.45
81	PCBP1_MOUSE	Sodium/potassium-transporting ATPase subunit alpha-1 OS=Mus musculus GN=Atp1a1 PE=1 SV=1	IISANGCKVDNSSLTGESEPQTR	2462.17	2462.17	-0.0052	47.56
81	PCBP1_MOUSE	Poly(rC)-binding protein 1 OS=Mus musculus GN=Pcbp1 PE=1 SV=1	INISEGNCPER	1287.59	1287.59	-0.0011	28.21
81	PCBP1_MOUSE	Poly(rC)-binding protein 1 OS=Mus musculus GN=Pcbp1 PE=1 SV=1	INISEGNCPER	1287.59	1287.59	-0.001	45.41
81	PCBP1_MOUSE	Poly(rC)-binding protein 1 OS=Mus musculus GN=Pcbp1 PE=1 SV=1	LVVPATQCGSLIGK	1441.79	1441.8	-0.0026	77.55
81	PCBP1_MOUSE	Poly(rC)-binding protein 1 OS=Mus musculus GN=Pcbp1 PE=1 SV=1	LVVPATQCGSLIGK	1441.79	1441.8	-0.0024	83
81	PCBP1_MOUSE	Poly(rC)-binding protein 1 OS=Mus musculus GN=Pcbp1 PE=1 SV=1	AITIAGVPQSVTECVK	1671.88	1671.89	-0.0029	47.7
81	PCBP1_MOUSE	Poly(rC)-binding protein 1 OS=Mus musculus GN=Pcbp1 PE=1 SV=1	AITIAGVPQSVTECVK	1671.88	1671.89	-0.0028	58.59
81	PCBP1_MOUSE	Poly(rC)-binding protein 1 OS=Mus musculus GN=Pcbp1 PE=1 SV=1	QICLVMLETLSQSPQGR	1958.99	1958.99	-0.0022	25.06
81	PCBP1_MOUSE	Poly(rC)-binding protein 1 OS=Mus musculus GN=Pcbp1 PE=1 SV=1	GYWASLDASTQTTHELTIPNNLIGCIIGR	3200.59	3200.59	-0.0025	52.95
82	IF4G1_MOUSE	Poly(rC)-binding protein 1 OS=Mus musculus GN=Pcbp1 PE=1 SV=1	CSDAAGYPHATHDLEGPPLDAYSIQGQHTISPLDLAK	3944.86	3944.86	-0.008	43.48
82	IF4G1_MOUSE	Eukaryotic translation initiation factor 4 gamma 1 OS=Mus musculus GN=Eif4g1 PE=1 SV=1	ATSLLLEILGLLCK	1542.9	1542.91	-0.0036	40.77
82	IF4G1_MOUSE	Eukaryotic translation initiation factor 4 gamma 1 OS=Mus musculus GN=Eif4g1 PE=1 SV=1	NHDEESLECLCR	1560.63	1560.63	-0.0024	24.12
82	IF4G1_MOUSE	Eukaryotic translation initiation factor 4 gamma 1 OS=Mus musculus GN=Eif4g1 PE=1 SV=1	LPGINCGPDFTPSFANLGR	2031.98	2031.98	-0.0035	105.47
82	IF4G1_MOUSE	Eukaryotic translation initiation factor 4 gamma 1 OS=Mus musculus GN=Eif4g1 PE=1 SV=1	LPGINCGPDFTPSFANLGR	2031.98	2031.98	-0.0024	94.67
82	IF4G1_MOUSE	Eukaryotic translation initiation factor 4 gamma 1 OS=Mus musculus GN=Eif4g1 PE=1 SV=1	EAVQCVQELASPSLLFIFVR	2305.21	2305.21	-0.003	62.71
83	RS6_MOUSE	Eukaryotic translation initiation factor 4 gamma 1 OS=Mus musculus GN=Eif4g1 PE=1 SV=1	EAVQCVQELASPSLLFIFVR	2305.21	2305.21	-0.0013	65.93
83	RS6_MOUSE	40S ribosomal protein S6 OS=Mus musculus GN=Rps6 PE=1 SV=1	LNISFPATGCQK	1334.66	1334.67	-0.0017	63.1
83	RS6_MOUSE	40S ribosomal protein S6 OS=Mus musculus GN=Rps6 PE=1 SV=1	LNISFPATGCQK	1334.66	1334.67	-0.0012	54.19
83	RS6_MOUSE	40S ribosomal protein S6 OS=Mus musculus GN=Rps6 PE=1 SV=1	GCIVDANLSVLNLVIVK	1826.03	1826.03	-0.0061	51.61
83	RS6_MOUSE	40S ribosomal protein S6 OS=Mus musculus GN=Rps6 PE=1 SV=1	GCIVDANLSVLNLVIVK	1826.03	1826.03	-0.0044	44.35
83	RS6_MOUSE	40S ribosomal protein S6 OS=Mus musculus GN=Rps6 PE=1 SV=1	GCIVDANLSVLNLVIVK	1826.03	1826.03	-0.0026	97.13
84	CBPE_MOUSE	40S ribosomal protein S6 OS=Mus musculus GN=Rps6 PE=1 SV=1	GCIVDANLSVLNLVIVK	1826.03	1826.03	-0.0018	91.5
84	CBPE_MOUSE	Carboxypeptidase E OS=Mus musculus GN=Cpe PE=1 SV=2	EALVSVWLQCTAISR	1731.9	1731.9	-0.0017	65.06
84	CBPE_MOUSE	Carboxypeptidase E OS=Mus musculus GN=Cpe PE=1 SV=2	EALVSVWLQCTAISR	1731.9	1731.9	-0.0006	43.45
84	CBPE_MOUSE	Carboxypeptidase E OS=Mus musculus GN=Cpe PE=1 SV=2	ELLIFLAQYLCNEYQK	2044.03	2044.03	-0.0029	101.39
84	CBPE_MOUSE	Carboxypeptidase E OS=Mus musculus GN=Cpe PE=1 SV=2	ELLIFLAQYLCNEYQK	2044.03	2044.03	-0.0016	36.15
84	CBPE_MOUSE	Carboxypeptidase E OS=Mus musculus GN=Cpe PE=1 SV=2	ELLIFLAQYLCNEYQK	2044.03	2044.03	-0.0009	71.8
84	CBPE_MOUSE	Carboxypeptidase E OS=Mus musculus GN=Cpe PE=1 SV=2	SGTAHEYSSCPDDAIFQSLAR	2311.01	2311.02	-0.0032	51.34
85	HPRT_MOUSE	Carboxypeptidase E OS=Mus musculus GN=Cpe PE=1 SV=2	SGTAHEYSSCPDDAIFQSLAR	2311.02	2311.02	-0.0022	52.52
85	HPRT_MOUSE	Hypoxanthine-guanine phosphoribosyltransferase OS=Mus musculus GN=Hprt1 PE=1 SV=3	SYCNDQSTGDIK	1386.57	1386.57	-0.0016	72.91
85	HPRT_MOUSE	Hypoxanthine-guanine phosphoribosyltransferase OS=Mus musculus GN=Hprt1 PE=1 SV=3	SYCNDQSTGDIK	1386.57	1386.57	-0.0014	55.91
85	HPRT_MOUSE	Hypoxanthine-guanine phosphoribosyltransferase OS=Mus musculus GN=Hprt1 PE=1 SV=3	DLNHVCVISETGK	1470.71	1470.71	-0.0028	47.82
85	HPRT_MOUSE	Hypoxanthine-guanine phosphoribosyltransferase OS=Mus musculus GN=Hprt1 PE=1 SV=3	DLNHVCVISETGK	1470.71	1470.71	-0.0018	55.23
85	HPRT_MOUSE	Hypoxanthine-guanine phosphoribosyltransferase OS=Mus musculus GN=Hprt1 PE=1 SV=3	SPSVVISDDEPGYDLDLFCIPNHYAEDLEK	3436.56	3436.57	-0.0047	69.66
86	RS8_MOUSE	Hypoxanthine-guanine phosphoribosyltransferase OS=Mus musculus GN=Hprt1 PE=1 SV=3	SPSVVISDDEPGYDLDLFCIPNHYAEDLEK	3436.56	3436.57	-0.004	86.87
86	RS8_MOUSE	40S ribosomal protein S8 OS=Mus musculus GN=Rps8 PE=1 SV=2	LLACIASR	902.499	902.501	-0.0014	44.17
86	RS8_MOUSE	40S ribosomal protein S8 OS=Mus musculus GN=Rps8 PE=1 SV=2	LLACIASR	902.5	902.501	-0.0009	22.81
86	RS8_MOUSE	40S ribosomal protein S8 OS=Mus musculus GN=Rps8 PE=1 SV=2	NCIVLIDSTPYR	1449.73	1449.73	-0.0022	71.67
86	RS8_MOUSE	40S ribosomal protein S8 OS=Mus musculus GN=Rps8 PE=1 SV=2	NCIVLIDSTPYR	1449.73	1449.73	-0.0019	74.93
86	RS8_MOUSE	40S ribosomal protein S8 OS=Mus musculus GN=Rps8 PE=1 SV=2	LLACIASRPGQCGR	1557.78	1557.79	-0.0029	34.38
86	RS8_MOUSE	40S ribosomal protein S8 OS=Mus musculus GN=Rps8 PE=1 SV=2	LLACIASRPGQCGR	1557.78	1557.79	-0.0019	37.37
86	RS8_MOUSE	40S ribosomal protein S8 OS=Mus musculus GN=Rps8 PE=1 SV=2	LLACIASRPGQCGR	1557.79	1557.79	-0.0017	40.62
86	RS8_MOUSE	40S ribosomal protein S8 OS=Mus musculus GN=Rps8 PE=1 SV=2	LDVGNFSWGSECCTR	1786.74	1786.74	-0.0035	61.98
87	USO1_MOUSE	40S ribosomal protein S8 OS=Mus musculus GN=Rps8 PE=1 SV=2	LDVGNFSWGSECCTR	1786.74	1786.74	-0.0023	73.78
87	USO1_MOUSE	General vesicular transport factor p115 OS=Mus musculus GN=Uso1 PE=1 SV=2	LQTENCELLQR	1402.68	1402.69	-0.0024	55.64
87	USO1_MOUSE	General vesicular transport factor p115 OS=Mus musculus GN=Uso1 PE=1 SV=2	SQLCSQSLEITR	1420.69	1420.7	-0.0031	57.6
87	USO1_MOUSE	General vesicular transport factor p115 OS=Mus musculus GN=Uso1 PE=1 SV=2	VLVSPTNPPGATSSCQK	1741.86	1741.87	-0.0025	72.53
87	USO1_MOUSE	General vesicular transport factor p115 OS=Mus musculus GN=Uso1 PE=1 SV=2	VLVSPTNPPGATSSCQK	1741.86	1741.87	-0.0021	68.54
87	USO1_MOUSE	General vesicular transport factor p115 OS=Mus musculus GN=Uso1 PE=1 SV=2	CQNEQLQTAVTQQASQIQQHK	2467.18	2467.19	-0.0038	53.21
87	USO1_MOUSE	General vesicular transport factor p115 OS=Mus musculus GN=Uso1 PE=1 SV=2	VQLATSIGNPPVSLLQQCTNILSQGSK	2852.5	2852.51	-0.0032	65.68
88	RL23_MOUSE	General vesicular transport factor p115 OS=Mus musculus GN=Uso1 PE=1 SV=2	VQLATSIGNPPVSLLQQCTNILSQGSK	2852.5	2852.51	-0.0027	49.87
88	RL23_MOUSE	60S ribosomal protein L23 OS=Mus musculus GN=Rpl23 PE=1 SV=1	ECADLWPR	1045.46	1045.47	-0.0021	49.46
88	RL23_MOUSE	60S ribosomal protein L23 OS=Mus musculus GN=Rpl23 PE=1 SV=1	ECADLWPR	1045.46	1045.47	-0.0019	49.19
88	RL23_MOUSE	60S ribosomal protein L23 OS=Mus musculus GN=Rpl23 PE=1 SV=1	ISLGLPVGAVINCADNTGAK	1969.03	1969.03	-0.0036	60.25
88	RL23_MOUSE	60S ribosomal protein L23 OS=Mus musculus GN=Rpl23 PE=1 SV=1	ISLGLPVGAVINCADNTGAK	1969.03	1969.03	-0.0033	81.26
88	RL23_MOUSE	60S ribosomal protein L23 OS=Mus musculus GN=Rpl23 PE=1 SV=1	ISLGLPVGAVINCADNTGAK	1969.03	1969.03	-0.0029	95
89	RHOA_MOUSE	60S ribosomal protein L23 OS=Mus musculus GN=Rpl23 PE=1 SV=1	ISLGLPVGAVINCADNTGAK	1969.03	1969.03	-0.0016	63.74
89	RHOA_MOUSE	Transforming protein RhoA OS=Mus musculus GN=Rhoa PE=1 SV=1	TCLLIVFSK	1079.6	1079.6	-0.0023	51.53
89	RHOA_MOUSE	Transforming protein RhoA OS=Mus musculus GN=Rhoa PE=1 SV=1	LVIVGDGACGK	1087.57	1087.57	-0.0021	51.87
89	RHOA_MOUSE	Transforming protein RhoA OS=Mus musculus GN=Rhoa PE=1 SV=1	HFCPNVPIILVGNK	1606.86	1606.87	-0.0032	38.43
89	RHOA_MOUSE	Transforming protein RhoA OS=Mus musculus GN=Rhoa PE=1 SV=1	HFCPNVPIILVGNK	1606.86	1606.87	-0.0032	41.88
89	RHOA_MOUSE	Transforming protein RhoA OS=Mus musculus GN=Rhoa PE=1 SV=1	HFCPNVPIILVGNK	1606.86	1606.87	-0.0031	81.86
89	RHOA_MOUSE	Transforming protein RhoA OS=Mus musculus GN=Rhoa PE=1 SV=1	HFCPNVPIILVGNK	1606.86	1606.87	-0.0028	81.86
90	ALDOA_MOUSE	Transforming protein RhoA OS=Mus musculus GN=Rhoa PE=1 SV=1	LRPLSYPDTDVILMCFSIDSPDSLENIPEK	3463.68	3463.69	-0.0047	69.97
90	ALDOA_MOUSE	Fructose-bisphosphate aldolase A OS=Mus musculus GN=Aldoa PE=1 SV=2	ALANSLACQGK	1131.57	1131.57	-0.0019	52.03
90	ALDOA_MOUSE	Fructose-bisphosphate aldolase A OS=Mus musculus GN=Aldoa PE=1 SV=2	CPLLKPWALTFSYGR	1807.94	1807.94	-0.0033	40.59
90	ALDOA_MOUSE	Fructose-bisphosphate aldolase A OS=Mus musculus GN=Aldoa PE=1 SV=2	CPLLKPWALTFSYGR	1807.94	1807.94	-0.002	38.68
90	ALDOA_MOUSE	Fructose-bisphosphate aldolase A OS=Mus musculus GN=Aldoa PE=1 SV=2	CPLLKPWALTFSYGR	1807.94	1807.94	-0.0018	42.99
90	ALDOA_MOUSE	Fructose-bisphosphate aldolase A OS=Mus musculus GN=Aldoa PE=1 SV=2	VNPCIGGVILFHETLYQK	2087.08	2087.09	-0.004	87.04
90	ALDOA_MOUSE	Fructose-bisphosphate aldolase A OS=Mus musculus GN=Aldoa PE=1 SV=2	VNPCIGGVILFHETLYQK	2087.08	2087.09	-0.0031	77.16
91	RAN_MOUSE	Fructose-bisphosphate aldolase A OS=Mus musculus GN=Aldoa PE=1 SV=2	YASICQQNGIVPIVEPEILPDGDHDLK	3019.49	3019.5	-0.0023	57.54
91	RAN_MOUSE	GTP-binding nuclear protein Ran OS=Mus musculus GN=Ran PE=1 SV=3	VCENIPIVLCGNK	1514.76	1514.76	-0.0029	69.23
91	RAN_MOUSE	GTP-binding nuclear protein Ran OS=Mus musculus GN=Ran PE=1 SV=3	VCENIPIVLCGNK	1514.76	1514.76	-0.0026	58.61
91	RAN_MOUSE	GTP-binding nuclear protein Ran OS=Mus musculus GN=Ran PE=1 SV=3	VCENIPIVLCGNKVDIK	1970.03	1970.03	-0.0034	46.87
91	RAN_MOUSE	GTP-binding nuclear protein Ran OS=Mus musculus GN=Ran PE=1 SV=3	VCENIPIVLCGNKVDIK	1970.03	1970.03	-0.003	27.06
91	RAN_MOUSE	GTP-binding nuclear protein Ran OS=Mus musculus GN=Ran PE=1 SV=3	VCENIPIVLCGNKVDIK	1970.03	1970.03	-0.003	21.79
91	RAN_MOUSE	GTP-binding nuclear protein Ran OS=Mus musculus GN=Ran PE=1 SV=3	DLVRVCENIPIVLCGNK	1998.04	1998.04	-0.0038	70.36
91	RAN_MOUSE	GTP-binding nuclear protein Ran OS=Mus musculus GN=Ran PE=1 SV=3	DLVRVCENIPIVLCGNK	1998.04	1998.04	-0.003	24.95
91	RAN_MOUSE	GTP-binding nuclear protein Ran OS=Mus musculus GN=Ran PE=1 SV=3	DLVRVCENIPIVLCGNK	1998.04	1998.04	-0.0029	58.96
91	RAN_MOUSE	GTP-binding nuclear protein Ran OS=Mus musculus GN=Ran PE=1 SV=3	DLVRVCENIPIVLCGNK	1998.04	1998.04	-0.0027	28.93
92	RL5_MOUSE	GTP-binding nuclear protein Ran OS=Mus musculus GN=Ran PE=1 SV=3	DLVRVCENIPIVLCGNKVDIK	2453.31	2453.31	-0.0032	41.46
92	RL5_MOUSE	60S ribosomal protein L5 OS=Mus musculus GN=Rpl5 PE=1 SV=3	DIICQIAYAR	1221.62	1221.62	-0.0026	53.3
92	RL5_MOUSE	60S ribosomal protein L5 OS=Mus musculus GN=Rpl5 PE=1 SV=3	DIICQIAYAR	1221.62	1221.62	-0.0021	52.49
92	RL5_MOUSE	60S ribosomal protein L5 OS=Mus musculus GN=Rpl5 PE=1 SV=3	VGLTNYAAAYCTGLLLAR	1926	1926	-0.0026	81.72
92	RL5_MOUSE	60S ribosomal protein L5 OS=Mus musculus GN=Rpl5 PE=1 SV=3	VGLTNYAAAYCTGLLLAR	1926	1926	-0.0025	90.61
92	RL5_MOUSE	60S ribosomal protein L5 OS=Mus musculus GN=Rpl5 PE=1 SV=3	VGLTNYAAAYCTGLLLAR	1926	1926	-0.0022	57.28
93	TCPG_MOUSE	60S ribosomal protein L5 OS=Mus musculus GN=Rpl5 PE=1 SV=3	VGLTNYAAAYCTGLLLAR	1926	1926	-0.0021	53.94
93	TCPG_MOUSE	T-complex protein 1 subunit gamma OS=Mus musculus GN=Cct3 PE=1 SV=1	ACTILLR	845.478	845.479	-0.0014	35.98
93	TCPG_MOUSE	T-complex protein 1 subunit gamma OS=Mus musculus GN=Cct3 PE=1 SV=1	TLIQNCGASTIR	1332.68	1332.68	-0.0027	61.23
93	TCPG_MOUSE	T-complex protein 1 subunit gamma OS=Mus musculus GN=Cct3 PE=1 SV=1	TLIQNCGASTIR	1332.68	1332.68	-0.0022	63.38
93	TCPG_MOUSE	T-complex protein 1 subunit gamma OS=Mus musculus GN=Cct3 PE=1 SV=1	IPGGIIEDSCVLR	1427.74	1427.74	-0.0033	67.92
93	TCPG_MOUSE	T-complex protein 1 subunit gamma OS=Mus musculus GN=Cct3 PE=1 SV=1	IPGGIIEDSCVLR	1427.74	1427.74	-0.0032	68.15
93	TCPG_MOUSE	T-complex protein 1 subunit gamma OS=Mus musculus GN=Cct3 PE=1 SV=1	WSSLACNIALDAVK	1546.78	1546.78	-0.0018	67.04
94	MDHC_MOUSE	T-complex protein 1 subunit gamma OS=Mus musculus GN=Cct3 PE=1 SV=1	IGDEYFTFITDCK	1607.72	1607.72	-0.0025	36.7
94	MDHC_MOUSE	Malate dehydrogenase, cytoplasmic OS=Mus musculus GN=Mdh1 PE=1 SV=3	ENFSCLTR	1025.46	1025.46	-0.0022	43.84
94	MDHC_MOUSE	Malate dehydrogenase, cytoplasmic OS=Mus musculus GN=Mdh1 PE=1 SV=3	ENFSCLTR	1025.46	1025.46	-0.002	21.43
94	MDHC_MOUSE	Malate dehydrogenase, cytoplasmic OS=Mus musculus GN=Mdh1 PE=1 SV=3	ENFSCLTR	1025.46	1025.46	-0.0018	38.91
94	MDHC_MOUSE	Malate dehydrogenase, cytoplasmic OS=Mus musculus GN=Mdh1 PE=1 SV=3	ENFSCLTR	1025.46	1025.46	-0.0012	26.97
94	MDHC_MOUSE	Malate dehydrogenase, cytoplasmic OS=Mus musculus GN=Mdh1 PE=1 SV=3	VIVVGNPANTNCLTASK	1756.91	1756.91	-0.0039	90.88
94	MDHC_MOUSE	Malate dehydrogenase, cytoplasmic OS=Mus musculus GN=Mdh1 PE=1 SV=3	VIVVGNPANTNCLTASK	1756.91	1756.91	-0.0029	104.98
95	CH60_MOUSE	Malate dehydrogenase, cytoplasmic OS=Mus musculus GN=Mdh1 PE=1 SV=3	VIVVGNPANTNCLTASK	1756.91	1756.91	-0.0026	35.91
95	CH60_MOUSE	60 kDa heat shock protein, mitochondrial OS=Mus musculus GN=Hspd1 PE=1 SV=1	CEFQDAYVLLSEK	1600.74	1600.74	-0.0029	75.82
95	CH60_MOUSE	60 kDa heat shock protein, mitochondrial OS=Mus musculus GN=Hspd1 PE=1 SV=1	AAVEEGIVLGGGCALLR	1683.9	1683.9	-0.0024	114.89
95	CH60_MOUSE	60 kDa heat shock protein, mitochondrial OS=Mus musculus GN=Hspd1 PE=1 SV=1	AAVEEGIVLGGGCALLR	1683.9	1683.9	-0.0024	105.58
96	HNRPL_MOUSE	60 kDa heat shock protein, mitochondrial OS=Mus musculus GN=Hspd1 PE=1 SV=1	AAVEEGIVLGGGCALLR	1683.9	1683.9	-0.0017	45.16
96	HNRPL_MOUSE	Heterogeneous nuclear ribonucleoprotein L OS=Mus musculus GN=Hnrnpl PE=1 SV=2	LCFSTAQHAS	1120.5	1120.5	-0.0018	38.74
96	HNRPL_MOUSE	Heterogeneous nuclear ribonucleoprotein L OS=Mus musculus GN=Hnrnpl PE=1 SV=2	VFNVFCLYGNVEK	1587.77	1587.78	-0.0018	84.29
96	HNRPL_MOUSE	Heterogeneous nuclear ribonucleoprotein L OS=Mus musculus GN=Hnrnpl PE=1 SV=2	VFNVFCLYGNVEK	1587.77	1587.78	-0.0018	84.68
96	HNRPL_MOUSE	Heterogeneous nuclear ribonucleoprotein L OS=Mus musculus GN=Hnrnpl PE=1 SV=2	ASLNGADIYSGCCTLK	1728.78	1728.78	-0.005	48.4
96	HNRPL_MOUSE	Heterogeneous nuclear ribonucleoprotein L OS=Mus musculus GN=Hnrnpl PE=1 SV=2	ASLNGADIYSGCCTLK	1728.78	1728.78	-0.0037	76.35
97	TCPQ_MOUSE	Heterogeneous nuclear ribonucleoprotein L OS=Mus musculus GN=Hnrnpl PE=1 SV=2	IQHPSNVLHFFNAPLEVTEENFFEICDELGVK	3771.82	3771.82	-0.0018	44.73
97	TCPQ_MOUSE	T-complex protein 1 subunit theta OS=Mus musculus GN=Cct8 PE=1 SV=3	NIQACKELAQTTR	1531.78	1531.78	-0.0027	37.85
97	TCPQ_MOUSE	T-complex protein 1 subunit theta OS=Mus musculus GN=Cct8 PE=1 SV=3	NIQACKELAQTTR	1531.78	1531.78	-0.0022	70.3
97	TCPQ_MOUSE	T-complex protein 1 subunit theta OS=Mus musculus GN=Cct8 PE=1 SV=3	NIQACKELAQTTR	1531.78	1531.78	-0.0019	66.98
97	TCPQ_MOUSE	T-complex protein 1 subunit theta OS=Mus musculus GN=Cct8 PE=1 SV=3	AHEILPELVCCSAK	1625.79	1625.79	-0.0033	53.34
97	TCPQ_MOUSE	T-complex protein 1 subunit theta OS=Mus musculus GN=Cct8 PE=1 SV=3	AHEILPELVCCSAK	1625.79	1625.79	-0.003	41.94
97	TCPQ_MOUSE	T-complex protein 1 subunit theta OS=Mus musculus GN=Cct8 PE=1 SV=3	AHEILPELVCCSAK	1625.79	1625.79	-0.0028	41.32
97	TCPQ_MOUSE	T-complex protein 1 subunit theta OS=Mus musculus GN=Cct8 PE=1 SV=3	AHEILPELVCCSAK	1625.79	1625.79	-0.0028	52.17
98	U520_MOUSE	T-complex protein 1 subunit theta OS=Mus musculus GN=Cct8 PE=1 SV=3	QITSYGETCPGLEQYAIK	2056.97	2056.98	-0.0036	59.19
98	U520_MOUSE	U5 small nuclear ribonucleoprotein 200 kDa helicase OS=Mus musculus GN=Snrnp200 PE=1 SV=1	DILCGAADEVLAVLK	1585.84	1585.84	-0.0019	82.51
98	U520_MOUSE	U5 small nuclear ribonucleoprotein 200 kDa helicase OS=Mus musculus GN=Snrnp200 PE=1 SV=1	WLSCETQLPVSFR	1621.79	1621.79	-0.0012	44.79
98	U520_MOUSE	U5 small nuclear ribonucleoprotein 200 kDa helicase OS=Mus musculus GN=Snrnp200 PE=1 SV=1	LTAIDILTTCAADIQR	1773.93	1773.93	-0.0028	69.86
98	U520_MOUSE	U5 small nuclear ribonucleoprotein 200 kDa helicase OS=Mus musculus GN=Snrnp200 PE=1 SV=1	LTAIDILTTCAADIQR	1773.93	1773.93	-0.002	87.24
99	PABP1_MOUSE	U5 small nuclear ribonucleoprotein 200 kDa helicase OS=Mus musculus GN=Snrnp200 PE=1 SV=1	LTAIDILTTCAADIQR	1773.93	1773.93	-0.0008	75.11
99	PABP1_MOUSE	Polyadenylate-binding protein 1 OS=Mus musculus GN=Pabpc1 PE=1 SV=2	GFGFVCFSSPEEATK	1661.74	1661.74	-0.0021	53.97
99	PABP1_MOUSE	Polyadenylate-binding protein 1 OS=Mus musculus GN=Pabpc1 PE=1 SV=2	GFGFVCFSSPEEATK	1661.74	1661.74	-0.0016	45.21
99	PABP1_MOUSE	Polyadenylate-binding protein 1 OS=Mus musculus GN=Pabpc1 PE=1 SV=2	ALYDTFSAFGNILSCK	1805.86	1805.87	-0.0029	110.62
100	PPIA_MOUSE	Polyadenylate-binding protein 1 OS=Mus musculus GN=Pabpc1 PE=1 SV=2	ALYDTFSAFGNILSCK	1805.86	1805.87	-0.0026	105.26
100	PPIA_MOUSE	Peptidyl-prolyl cis-trans isomerase A OS=Mus musculus GN=Ppia PE=1 SV=2	ITISDCGQL	1005.48	1005.48	-0.0025	51.04
100	PPIA_MOUSE	Peptidyl-prolyl cis-trans isomerase A OS=Mus musculus GN=Ppia PE=1 SV=2	ITISDCGQL	1005.48	1005.48	-0.002	26.81
100	PPIA_MOUSE	Peptidyl-prolyl cis-trans isomerase A OS=Mus musculus GN=Ppia PE=1 SV=2	ITISDCGQL	1005.48	1005.48	-0.0014	26.83
100	PPIA_MOUSE	Peptidyl-prolyl cis-trans isomerase A OS=Mus musculus GN=Ppia PE=1 SV=2	IIPGFMCQGGDFTR	1597.74	1597.74	-0.0026	49.99
100	PPIA_MOUSE	Peptidyl-prolyl cis-trans isomerase A OS=Mus musculus GN=Ppia PE=1 SV=2	IIPGFMCQGGDFTR	1597.74	1597.74	-0.0022	58.69
100	PPIA_MOUSE	Peptidyl-prolyl cis-trans isomerase A OS=Mus musculus GN=Ppia PE=1 SV=2	IIPGFMCQGGDFTR	1613.73	1613.73	-0.0032	20.7
100	PPIA_MOUSE	Peptidyl-prolyl cis-trans isomerase A OS=Mus musculus GN=Ppia PE=1 SV=2	IIPGFMCQGGDFTR	1613.73	1613.73	-0.0021	30.56
100	PPIA_MOUSE	Peptidyl-prolyl cis-trans isomerase A OS=Mus musculus GN=Ppia PE=1 SV=2	HTGPGILSMANAGPNTNGSQFFICTAK	2790.32	2790.32	-0.0032	74.17
101	PA2G4_MOUSE	Peptidyl-prolyl cis-trans isomerase A OS=Mus musculus GN=Ppia PE=1 SV=2	HTGPGILSMANAGPNTNGSQFFICTAK	2790.32	2790.32	-0.0018	69.56
101	PA2G4_MOUSE	Proliferation-associated protein 2G4 OS=Mus musculus GN=Pa2g4 PE=1 SV=3	AAHLCAEAALR	1181.6	1181.6	-0.0024	65.4
101	PA2G4_MOUSE	Proliferation-associated protein 2G4 OS=Mus musculus GN=Pa2g4 PE=1 SV=3	AAHLCAEAALR	1181.6	1181.6	-0.0022	31.34
101	PA2G4_MOUSE	Proliferation-associated protein 2G4 OS=Mus musculus GN=Pa2g4 PE=1 SV=3	AAHLCAEAALR	1181.6	1181.6	-0.002	35.25
101	PA2G4_MOUSE	Proliferation-associated protein 2G4 OS=Mus musculus GN=Pa2g4 PE=1 SV=3	GIAFPTSISVNNCVCHFSPLK	2347.14	2347.15	-0.0049	121.63
102	TCPD_MOUSE	Proliferation-associated protein 2G4 OS=Mus musculus GN=Pa2g4 PE=1 SV=3	GIAFPTSISVNNCVCHFSPLK	2347.14	2347.15	-0.0046	87.16
102	TCPD_MOUSE	T-complex protein 1 subunit delta OS=Mus musculus GN=Cct4 PE=1 SV=3	EDIEFICK	1052.48	1052.48	-0.0023	22.4
102	TCPD_MOUSE	T-complex protein 1 subunit delta OS=Mus musculus GN=Cct4 PE=1 SV=3	TGCNVLLIQK	1144.62	1144.63	-0.0026	47.97
102	TCPD_MOUSE	T-complex protein 1 subunit delta OS=Mus musculus GN=Cct4 PE=1 SV=3	SIHDALCVIR	1182.62	1182.62	-0.0026	36.16
102	TCPD_MOUSE	T-complex protein 1 subunit delta OS=Mus musculus GN=Cct4 PE=1 SV=3	SIHDALCVIR	1182.62	1182.62	-0.0022	23.65
102	TCPD_MOUSE	T-complex protein 1 subunit delta OS=Mus musculus GN=Cct4 PE=1 SV=3	SIHDALCVIR	1182.62	1182.62	-0.0021	37.31
102	TCPD_MOUSE	T-complex protein 1 subunit delta OS=Mus musculus GN=Cct4 PE=1 SV=3	IGLIQFCLSAPK	1345.74	1345.74	-0.0017	61.12
102	TCPD_MOUSE	T-complex protein 1 subunit delta OS=Mus musculus GN=Cct4 PE=1 SV=3	IGLIQFCLSAPK	1345.74	1345.74	-0.001	60.35
102	TCPD_MOUSE	T-complex protein 1 subunit delta OS=Mus musculus GN=Cct4 PE=1 SV=3	LGGTIDDCELVEGLVLTQK	2059.05	2059.05	0.0011	70.82
103	HYOU1_MOUSE	T-complex protein 1 subunit delta OS=Mus musculus GN=Cct4 PE=1 SV=3	AQDIEAGDGTTSVVIIAGSLLDSCTKLLQK	3102.61	3102.61	-0.0064	53.49
103	HYOU1_MOUSE	Hypoxia up-regulated protein 1 OS=Mus musculus GN=Hyou1 PE=1 SV=1	LCQGLFFR	1039.53	1039.53	-0.0018	43.4
103	HYOU1_MOUSE	Hypoxia up-regulated protein 1 OS=Mus musculus GN=Hyou1 PE=1 SV=1	LCQGLFFR	1039.53	1039.53	-0.0018	41.27
103	HYOU1_MOUSE	Hypoxia up-regulated protein 1 OS=Mus musculus GN=Hyou1 PE=1 SV=1	LCQGLFFR	1039.53	1039.53	-0.0012	23.6
103	HYOU1_MOUSE	Hypoxia up-regulated protein 1 OS=Mus musculus GN=Hyou1 PE=1 SV=1	KLCQGLFFR	1167.62	1167.62	-0.0023	36.95
103	HYOU1_MOUSE	Hypoxia up-regulated protein 1 OS=Mus musculus GN=Hyou1 PE=1 SV=1	KLCQGLFFR	1167.62	1167.62	-0.0021	32.31
103	HYOU1_MOUSE	Hypoxia up-regulated protein 1 OS=Mus musculus GN=Hyou1 PE=1 SV=1	KLCQGLFFR	1167.62	1167.62	-0.002	29.11
103	HYOU1_MOUSE	Hypoxia up-regulated protein 1 OS=Mus musculus GN=Hyou1 PE=1 SV=1	KLCQGLFFR	1167.62	1167.62	-0.0018	33.69
103	HYOU1_MOUSE	Hypoxia up-regulated protein 1 OS=Mus musculus GN=Hyou1 PE=1 SV=1	VEFEELCADLFDR	1641.73	1641.73	-0.0021	77.86
104	AP3D1_MOUSE	Hypoxia up-regulated protein 1 OS=Mus musculus GN=Hyou1 PE=1 SV=1	VEFEELCADLFDR	1641.73	1641.73	-0.002	89.54
104	AP3D1_MOUSE	AP-3 complex subunit delta-1 OS=Mus musculus GN=Ap3d1 PE=1 SV=1	ASCILQLVK	1030.58	1030.58	-0.002	26.42
104	AP3D1_MOUSE	AP-3 complex subunit delta-1 OS=Mus musculus GN=Ap3d1 PE=1 SV=1	ASCILQLVK	1030.58	1030.58	-0.0018	47.34
104	AP3D1_MOUSE	AP-3 complex subunit delta-1 OS=Mus musculus GN=Ap3d1 PE=1 SV=1	DLILQCLDDKDESIR	1831.9	1831.9	-0.0022	29.53
104	AP3D1_MOUSE	AP-3 complex subunit delta-1 OS=Mus musculus GN=Ap3d1 PE=1 SV=1	LEDPDPGVQSAAVNVICELAR	2252.11	2252.11	-0.0046	92.88
104	AP3D1_MOUSE	AP-3 complex subunit delta-1 OS=Mus musculus GN=Ap3d1 PE=1 SV=1	LEDPDPGVQSAAVNVICELAR	2252.11	2252.11	-0.0034	67.16
105	APT_MOUSE	AP-3 complex subunit delta-1 OS=Mus musculus GN=Ap3d1 PE=1 SV=1	LEDPDPGVQSAAVNVICELAR	2252.11	2252.11	-0.0015	91.5
105	APT_MOUSE	Adenine phosphoribosyltransferase OS=Mus musculus GN=Aprt PE=1 SV=2	GFLFGPSLAQELGVGCVLIR	2132.14	2132.15	-0.0039	53.93
105	APT_MOUSE	Adenine phosphoribosyltransferase OS=Mus musculus GN=Aprt PE=1 SV=2	GFLFGPSLAQELGVGCVLIR	2132.14	2132.15	-0.0031	95.71
105	APT_MOUSE	Adenine phosphoribosyltransferase OS=Mus musculus GN=Aprt PE=1 SV=2	GFLFGPSLAQELGVGCVLIR	2132.14	2132.15	-0.0018	95.66
106	CSN3_MOUSE	Adenine phosphoribosyltransferase OS=Mus musculus GN=Aprt PE=1 SV=2	GFLFGPSLAQELGVGCVLIR	2132.14	2132.15	-0.0015	71.42
106	CSN3_MOUSE	COP9 signalosome complex subunit 3 OS=Mus musculus GN=Cops3 PE=1 SV=3	YATDTFAGLCHQLTNALVER	2279.1	2279.1	-0.0032	103
106	CSN3_MOUSE	COP9 signalosome complex subunit 3 OS=Mus musculus GN=Cops3 PE=1 SV=3	YATDTFAGLCHQLTNALVER	2279.1	2279.1	-0.0019	46.6
106	CSN3_MOUSE	COP9 signalosome complex subunit 3 OS=Mus musculus GN=Cops3 PE=1 SV=3	YATDTFAGLCHQLTNALVER	2279.1	2279.1	-0.0019	58.54
107	PDXD1_MOUSE	COP9 signalosome complex subunit 3 OS=Mus musculus GN=Cops3 PE=1 SV=3	YATDTFAGLCHQLTNALVER	2279.1	2279.1	0	98.3
107	PDXD1_MOUSE	Pyridoxal-dependent decarboxylase domain-containing protein 1 OS=Mus musculus GN=Pdxdc1 PE=1 SV=2	LPVLTCTLQLR	1312.75	1312.75	-0.0018	64.55
107	PDXD1_MOUSE	Pyridoxal-dependent decarboxylase domain-containing protein 1 OS=Mus musculus GN=Pdxdc1 PE=1 SV=2	GEDVDQLITCIQSK	1604.77	1604.77	-0.0027	61.92
107	PDXD1_MOUSE	Pyridoxal-dependent decarboxylase domain-containing protein 1 OS=Mus musculus GN=Pdxdc1 PE=1 SV=2	GEDVDQLITCIQSK	1604.77	1604.77	-0.001	43.48
107	PDXD1_MOUSE	Pyridoxal-dependent decarboxylase domain-containing protein 1 OS=Mus musculus GN=Pdxdc1 PE=1 SV=2	PGLGQYLCNQLGLPFPCLCR	2362.14	2362.14	-0.0031	58.9
107	PDXD1_MOUSE	Pyridoxal-dependent decarboxylase domain-containing protein 1 OS=Mus musculus GN=Pdxdc1 PE=1 SV=2	PGLGQYLCNQLGLPFPCLCR	2362.14	2362.14	-0.0024	53.07
107	PDXD1_MOUSE	Pyridoxal-dependent decarboxylase domain-containing protein 1 OS=Mus musculus GN=Pdxdc1 PE=1 SV=2	PGLGQYLCNQLGLPFPCLCR	2362.14	2362.14	-0.0007	42.77
108	RS4X_MOUSE	Pyridoxal-dependent decarboxylase domain-containing protein 1 OS=Mus musculus GN=Pdxdc1 PE=1 SV=2	PGLGQYLCNQLGLPFPCLCR	2362.14	2362.14	0.0001	49.46
108	RS4X_MOUSE	40S ribosomal protein S4, X isoform OS=Mus musculus GN=Rps4x PE=2 SV=2	ECLPLIIFLR	1272.72	1272.73	-0.0027	30.25
108	RS4X_MOUSE	40S ribosomal protein S4, X isoform OS=Mus musculus GN=Rps4x PE=2 SV=2	ECLPLIIFLR	1272.72	1272.73	-0.0025	27.55
108	RS4X_MOUSE	40S ribosomal protein S4, X isoform OS=Mus musculus GN=Rps4x PE=2 SV=2	ECLPLIIFLR	1272.72	1272.73	-0.0021	28.07
108	RS4X_MOUSE	40S ribosomal protein S4, X isoform OS=Mus musculus GN=Rps4x PE=2 SV=2	ECLPLIIFLR	1272.73	1272.73	-0.0011	28.08
108	RS4X_MOUSE	40S ribosomal protein S4, X isoform OS=Mus musculus GN=Rps4x PE=2 SV=2	LRECLPLIIFLR	1541.91	1541.91	-0.0026	40.49
108	RS4X_MOUSE	40S ribosomal protein S4, X isoform OS=Mus musculus GN=Rps4x PE=2 SV=2	LRECLPLIIFLR	1541.91	1541.91	-0.002	59.32
108	RS4X_MOUSE	40S ribosomal protein S4, X isoform OS=Mus musculus GN=Rps4x PE=2 SV=2	FDTGNLCMVTGGANLGR	1781.82	1781.82	-0.002	55.55
109	DX39B_MOUSE	40S ribosomal protein S4, X isoform OS=Mus musculus GN=Rps4x PE=2 SV=2	FDTGNLCMVTGGANLGR	1781.82	1781.82	-0.0014	109.84
109	DX39B_MOUSE	Spliceosome RNA helicase Ddx39b OS=Mus musculus GN=Ddx39b PE=1 SV=1	HFILDECDK	1175.53	1175.53	-0.002	30.72
109	DX39B_MOUSE	Spliceosome RNA helicase Ddx39b OS=Mus musculus GN=Ddx39b PE=1 SV=1	NCPHIVVGTPGR	1305.66	1305.66	-0.0029	31.72
109	DX39B_MOUSE	Spliceosome RNA helicase Ddx39b OS=Mus musculus GN=Ddx39b PE=1 SV=1	NCPHIVVGTPGR	1305.66	1305.66	-0.0025	53.44
109	DX39B_MOUSE	Spliceosome RNA helicase Ddx39b OS=Mus musculus GN=Ddx39b PE=1 SV=1	NCPHIVVGTPGR	1305.66	1305.66	-0.0024	60.05
109	DX39B_MOUSE	Spliceosome RNA helicase Ddx39b OS=Mus musculus GN=Ddx39b PE=1 SV=1	NCPHIVVGTPGR	1305.66	1305.66	-0.0023	25.76
109	DX39B_MOUSE	Spliceosome RNA helicase Ddx39b OS=Mus musculus GN=Ddx39b PE=1 SV=1	KNCPHIVVGTPGR	1433.75	1433.76	-0.0022	55.35
109	DX39B_MOUSE	Spliceosome RNA helicase Ddx39b OS=Mus musculus GN=Ddx39b PE=1 SV=1	KNCPHIVVGTPGR	1433.75	1433.76	-0.002	40.04
109	DX39B_MOUSE	Spliceosome RNA helicase Ddx39b OS=Mus musculus GN=Ddx39b PE=1 SV=1	CIALAQLLVEQNFPAIAIHR	2276.24	2276.25	-0.0026	52.18
109	DX39B_MOUSE	Spliceosome RNA helicase Ddx39b OS=Mus musculus GN=Ddx39b PE=1 SV=1	CIALAQLLVEQNFPAIAIHR	2276.24	2276.25	-0.0018	60.92
110	PGK1_MOUSE	Spliceosome RNA helicase Ddx39b OS=Mus musculus GN=Ddx39b PE=1 SV=1	AIVDCGFEHPSEVQHECIPQAILGMDVLCQAK	3650.7	3650.7	-0.003	20.11
110	PGK1_MOUSE	Phosphoglycerate kinase 1 OS=Mus musculus GN=Pgk1 PE=1 SV=4	FCLDNGAK	923.415	923.417	-0.0021	29.88
110	PGK1_MOUSE	Phosphoglycerate kinase 1 OS=Mus musculus GN=Pgk1 PE=1 SV=4	FCLDNGAK	923.415	923.417	-0.0018	27.37
110	PGK1_MOUSE	Phosphoglycerate kinase 1 OS=Mus musculus GN=Pgk1 PE=1 SV=4	FCLDNGAK	923.415	923.417	-0.0018	41.63
110	PGK1_MOUSE	Phosphoglycerate kinase 1 OS=Mus musculus GN=Pgk1 PE=1 SV=4	DCVGPEVENACANPAAGTVILLENLR	2781.34	2781.34	-0.0057	75.1
110	PGK1_MOUSE	Phosphoglycerate kinase 1 OS=Mus musculus GN=Pgk1 PE=1 SV=4	DCVGPEVENACANPAAGTVILLENLR	2781.34	2781.34	-0.002	76.8
111	VATB2_MOUSE	Phosphoglycerate kinase 1 OS=Mus musculus GN=Pgk1 PE=1 SV=4	DVLFLKDCVGPEVENACANPAAGTVILLENLR	3496.77	3496.77	-0.0023	101.75
111	VATB2_MOUSE	V-type proton ATPase subunit B, brain isoform OS=Mus musculus GN=Atp6v1b2 PE=1 SV=1	TSCEFTGDILR	1297.59	1297.6	-0.0026	41.86
111	VATB2_MOUSE	V-type proton ATPase subunit B, brain isoform OS=Mus musculus GN=Atp6v1b2 PE=1 SV=1	IPIFSAAGLPHNEIAAQICR	2177.14	2177.14	-0.0036	71.66
111	VATB2_MOUSE	V-type proton ATPase subunit B, brain isoform OS=Mus musculus GN=Atp6v1b2 PE=1 SV=1	IPIFSAAGLPHNEIAAQICR	2177.14	2177.14	-0.0031	77.14
111	VATB2_MOUSE	V-type proton ATPase subunit B, brain isoform OS=Mus musculus GN=Atp6v1b2 PE=1 SV=1	GPVVLAEDFLDIMGQPINPQCR	2468.22	2468.22	-0.0024	58.36
112	PRPS1_MOUSE	V-type proton ATPase subunit B, brain isoform OS=Mus musculus GN=Atp6v1b2 PE=1 SV=1	GPVVLAEDFLDIMGQPINPQCR	2468.22	2468.22	0	63.85
112	PRPS1_MOUSE	Ribose-phosphate pyrophosphokinase 1 OS=Mus musculus GN=Prps1 PE=1 SV=4	VTAVIPCFPYAR	1392.72	1392.72	-0.002	38.29
112	PRPS1_MOUSE	Ribose-phosphate pyrophosphokinase 1 OS=Mus musculus GN=Prps1 PE=1 SV=4	VTAVIPCFPYAR	1392.72	1392.72	-0.0016	35.7
112	PRPS1_MOUSE	Ribose-phosphate pyrophosphokinase 1 OS=Mus musculus GN=Prps1 PE=1 SV=4	FSNQETCVEIGESVR	1753.79	1753.79	-0.003	54.9
112	PRPS1_MOUSE	Ribose-phosphate pyrophosphokinase 1 OS=Mus musculus GN=Prps1 PE=1 SV=4	FSNQETCVEIGESVR	1753.79	1753.79	-0.0018	61.72
112	PRPS1_MOUSE	Ribose-phosphate pyrophosphokinase 1 OS=Mus musculus GN=Prps1 PE=1 SV=4	ENISEWRNCTIVSPDAGGAK	2203.03	2203.03	-0.0025	36.62
112	PRPS1_MOUSE	Ribose-phosphate pyrophosphokinase 1 OS=Mus musculus GN=Prps1 PE=1 SV=4	INNACFEAVVVTNTIPQEDK	2261.1	2261.1	-0.0033	57.78
113	RS3_MOUSE	Ribose-phosphate pyrophosphokinase 1 OS=Mus musculus GN=Prps1 PE=1 SV=4	INNACFEAVVVTNTIPQEDK	2261.1	2261.1	-0.0018	65.25
113	RS3_MOUSE	40S ribosomal protein S3 OS=Mus musculus GN=Rps3 PE=1 SV=1	ACYGVLR	837.415	837.417	-0.0014	21.1
113	RS3_MOUSE	40S ribosomal protein S3 OS=Mus musculus GN=Rps3 PE=1 SV=1	GCEVVVSGK	933.457	933.459	-0.0021	48.71
113	RS3_MOUSE	40S ribosomal protein S3 OS=Mus musculus GN=Rps3 PE=1 SV=1	GCEVVVSGK	933.457	933.459	-0.002	27.22
113	RS3_MOUSE	40S ribosomal protein S3 OS=Mus musculus GN=Rps3 PE=1 SV=1	GCEVVVSGK	933.457	933.459	-0.0018	51.72
113	RS3_MOUSE	40S ribosomal protein S3 OS=Mus musculus GN=Rps3 PE=1 SV=1	RACYGVLR	993.517	993.518	-0.001	31.63
113	RS3_MOUSE	40S ribosomal protein S3 OS=Mus musculus GN=Rps3 PE=1 SV=1	GLCAIAQAESLR	1287.66	1287.66	-0.0022	78.07
113	RS3_MOUSE	40S ribosomal protein S3 OS=Mus musculus GN=Rps3 PE=1 SV=1	GLCAIAQAESLR	1287.66	1287.66	-0.0021	66.55
113	RS3_MOUSE	40S ribosomal protein S3 OS=Mus musculus GN=Rps3 PE=1 SV=1	VATRGLCAIAQAESLR	1714.91	1714.91	-0.0029	30.54
114	CBS_MOUSE	40S ribosomal protein S3 OS=Mus musculus GN=Rps3 PE=1 SV=1	FGFPEGSVELYAEKVATRGLCAIAQAESLR	3268.65	3268.66	-0.0039	21.49
114	CBS_MOUSE	Cystathionine beta-synthase OS=Mus musculus GN=Cbs PE=2 SV=3	CTWQLGR	919.431	919.433	-0.0022	40.82
114	CBS_MOUSE	Cystathionine beta-synthase OS=Mus musculus GN=Cbs PE=2 SV=3	CTWQLGR	919.431	919.433	-0.0021	48.08
114	CBS_MOUSE	Cystathionine beta-synthase OS=Mus musculus GN=Cbs PE=2 SV=3	CTWQLGR	919.431	919.433	-0.002	20.72
114	CBS_MOUSE	Cystathionine beta-synthase OS=Mus musculus GN=Cbs PE=2 SV=3	VRPSDEVCK	1088.53	1088.53	-0.0017	28.62
114	CBS_MOUSE	Cystathionine beta-synthase OS=Mus musculus GN=Cbs PE=2 SV=3	CVVILPDSVR	1156.62	1156.63	-0.0025	34.44
114	CBS_MOUSE	Cystathionine beta-synthase OS=Mus musculus GN=Cbs PE=2 SV=3	CVVILPDSVR	1156.63	1156.63	-0.002	42.55
114	CBS_MOUSE	Cystathionine beta-synthase OS=Mus musculus GN=Cbs PE=2 SV=3	CEFFNAGGSVK	1214.54	1214.54	-0.0016	32.7
114	CBS_MOUSE	Cystathionine beta-synthase OS=Mus musculus GN=Cbs PE=2 SV=3	ELQEGQRCVVILPDSVR	1997.03	1997.04	-0.0034	35.61
114	CBS_MOUSE	Cystathionine beta-synthase OS=Mus musculus GN=Cbs PE=2 SV=3	NASNPLAHYDDTAEEILQQCDGK	2588.14	2588.14	-0.004	45.94
114	CBS_MOUSE	Cystathionine beta-synthase OS=Mus musculus GN=Cbs PE=2 SV=3	VQELSLSAPLTVLPTVTCEDTIAILR	2838.54	2838.54	-0.002	62.85
115	RL3_MOUSE	Cystathionine beta-synthase OS=Mus musculus GN=Cbs PE=2 SV=3	VQELSLSAPLTVLPTVTCEDTIAILR	2838.54	2838.54	-0.0009	51.41
115	RL3_MOUSE	60S ribosomal protein L3 OS=Mus musculus GN=Rpl3 PE=1 SV=3	YCQVIR	837.415	837.417	-0.0019	25.27
115	RL3_MOUSE	60S ribosomal protein L3 OS=Mus musculus GN=Rpl3 PE=1 SV=3	YCQVIR	837.415	837.417	-0.0017	33.13
115	RL3_MOUSE	60S ribosomal protein L3 OS=Mus musculus GN=Rpl3 PE=1 SV=3	YCQVIR	837.416	837.417	-0.0008	33.18
115	RL3_MOUSE	60S ribosomal protein L3 OS=Mus musculus GN=Rpl3 PE=1 SV=3	VACIGAWHPAR	1236.62	1236.62	-0.0024	65.02
115	RL3_MOUSE	60S ribosomal protein L3 OS=Mus musculus GN=Rpl3 PE=1 SV=3	VACIGAWHPAR	1236.62	1236.62	-0.0023	73.58
115	RL3_MOUSE	60S ribosomal protein L3 OS=Mus musculus GN=Rpl3 PE=1 SV=3	VACIGAWHPAR	1236.62	1236.62	-0.0021	40.7
115	RL3_MOUSE	60S ribosomal protein L3 OS=Mus musculus GN=Rpl3 PE=1 SV=3	VACIGAWHPAR	1236.62	1236.62	-0.0018	36.58
115	RL3_MOUSE	60S ribosomal protein L3 OS=Mus musculus GN=Rpl3 PE=1 SV=3	KVACIGAWHPAR	1364.71	1364.71	-0.0024	32.29
116	RS5_MOUSE	60S ribosomal protein L3 OS=Mus musculus GN=Rpl3 PE=1 SV=3	TVFAEHISDECK	1434.64	1434.64	-0.0026	70.38
116	RS5_MOUSE	40S ribosomal protein S5 OS=Mus musculus GN=Rps5 PE=1 SV=3	AQCPIVER	971.484	971.486	-0.0017	20.48
116	RS5_MOUSE	40S ribosomal protein S5 OS=Mus musculus GN=Rps5 PE=1 SV=3	AQCPIVER	971.485	971.486	-0.0012	28.96
116	RS5_MOUSE	40S ribosomal protein S5 OS=Mus musculus GN=Rps5 PE=1 SV=3	KAQCPIVER	1099.58	1099.58	-0.0026	35.72
116	RS5_MOUSE	40S ribosomal protein S5 OS=Mus musculus GN=Rps5 PE=1 SV=3	KAQCPIVER	1099.58	1099.58	-0.0022	49.68
116	RS5_MOUSE	40S ribosomal protein S5 OS=Mus musculus GN=Rps5 PE=1 SV=3	VNQAIWLLCTGAR	1500.78	1500.79	-0.0028	44.32
116	RS5_MOUSE	40S ribosomal protein S5 OS=Mus musculus GN=Rps5 PE=1 SV=3	VNQAIWLLCTGAR	1500.78	1500.79	-0.0024	50.44
116	RS5_MOUSE	40S ribosomal protein S5 OS=Mus musculus GN=Rps5 PE=1 SV=3	VNQAIWLLCTGAR	1500.79	1500.79	-0.0017	87.03
117	RL7A_MOUSE	40S ribosomal protein S5 OS=Mus musculus GN=Rps5 PE=1 SV=3	VNQAIWLLCTGAR	1500.79	1500.79	-0.0008	76.39
117	RL7A_MOUSE	60S ribosomal protein L7a OS=Mus musculus GN=Rpl7a PE=2 SV=2	TCTTVAFTQVNSEDK	1699.77	1699.77	-0.0028	26.37
117	RL7A_MOUSE	60S ribosomal protein L7a OS=Mus musculus GN=Rpl7a PE=2 SV=2	TCTTVAFTQVNSEDK	1699.77	1699.77	-0.0023	63.4
117	RL7A_MOUSE	60S ribosomal protein L7a OS=Mus musculus GN=Rpl7a PE=2 SV=2	TCTTVAFTQVNSEDK	1699.77	1699.77	-0.0023	59.4
117	RL7A_MOUSE	60S ribosomal protein L7a OS=Mus musculus GN=Rpl7a PE=2 SV=2	KTCTTVAFTQVNSEDK	1827.86	1827.87	-0.0033	74.89
118	ANXA4_MOUSE	60S ribosomal protein L7a OS=Mus musculus GN=Rpl7a PE=2 SV=2	AQLVVIAHDVDPIELVVFLPALCR	2686.49	2686.49	0.0025	82.75
118	ANXA4_MOUSE	Annexin A4 OS=Mus musculus GN=Anxa4 PE=2 SV=4	FLSILCSR	994.525	994.527	-0.0016	52.83
118	ANXA4_MOUSE	Annexin A4 OS=Mus musculus GN=Anxa4 PE=2 SV=4	FLSILCSR	994.526	994.527	-0.0014	22.44
118	ANXA4_MOUSE	Annexin A4 OS=Mus musculus GN=Anxa4 PE=2 SV=4	VLLVLCGGDD	1059.53	1059.53	-0.0015	48.69
118	ANXA4_MOUSE	Annexin A4 OS=Mus musculus GN=Anxa4 PE=2 SV=4	VLLVLCGGDD	1059.53	1059.53	-0.0002	47.2
118	ANXA4_MOUSE	Annexin A4 OS=Mus musculus GN=Anxa4 PE=2 SV=4	GAGTDEGCLIEILASR	1660.81	1660.81	-0.0028	80.5
119	EIF3D_MOUSE	Annexin A4 OS=Mus musculus GN=Anxa4 PE=2 SV=4	GAGTDEGCLIEILASR	1660.81	1660.81	-0.0022	80.61
119	EIF3D_MOUSE	Eukaryotic translation initiation factor 3 subunit D OS=Mus musculus GN=Eif3d PE=1 SV=2	WTCCALLAGSEYLK	1670.78	1670.78	-0.0046	32.16
119	EIF3D_MOUSE	Eukaryotic translation initiation factor 3 subunit D OS=Mus musculus GN=Eif3d PE=1 SV=2	TQGNVFATDAILATLMSCTR	2169.05	2169.06	-0.0064	81.3
119	EIF3D_MOUSE	Eukaryotic translation initiation factor 3 subunit D OS=Mus musculus GN=Eif3d PE=1 SV=2	TQGNVFATDAILATLMSCTR	2169.05	2169.06	-0.0045	131.06
120	DPYL2_MOUSE	Eukaryotic translation initiation factor 3 subunit D OS=Mus musculus GN=Eif3d PE=1 SV=2	TQGNVFATDAILATLMSCTR	2169.05	2169.06	-0.0019	47.01
120	DPYL2_MOUSE	Dihydropyrimidinase-related protein 2 OS=Mus musculus GN=Dpysl2 PE=1 SV=2	GLYDGPVCEVSVTPK	1619.78	1619.79	-0.0031	70.48
120	DPYL2_MOUSE	Dihydropyrimidinase-related protein 2 OS=Mus musculus GN=Dpysl2 PE=1 SV=2	GLYDGPVCEVSVTPK	1619.78	1619.79	-0.0024	79.35
120	DPYL2_MOUSE	Dihydropyrimidinase-related protein 2 OS=Mus musculus GN=Dpysl2 PE=1 SV=2	SITIANQTNCPLYVTK	1821.92	1821.93	-0.0045	69.58
121	TCPB_MOUSE	Dihydropyrimidinase-related protein 2 OS=Mus musculus GN=Dpysl2 PE=1 SV=2	SITIANQTNCPLYVTK	1821.93	1821.93	-0.0032	67.58
121	TCPB_MOUSE	T-complex protein 1 subunit beta OS=Mus musculus GN=Cct2 PE=1 SV=4	HGINCFINR	1129.54	1129.55	-0.0025	46.23
121	TCPB_MOUSE	T-complex protein 1 subunit beta OS=Mus musculus GN=Cct2 PE=1 SV=4	HGINCFINR	1129.54	1129.55	-0.0018	55.13
121	TCPB_MOUSE	T-complex protein 1 subunit beta OS=Mus musculus GN=Cct2 PE=1 SV=4	SLHDALCVLAQTVK	1553.82	1553.82	-0.0038	37.14
121	TCPB_MOUSE	T-complex protein 1 subunit beta OS=Mus musculus GN=Cct2 PE=1 SV=4	SLHDALCVLAQTVK	1553.82	1553.82	-0.0031	32.51
121	TCPB_MOUSE	T-complex protein 1 subunit beta OS=Mus musculus GN=Cct2 PE=1 SV=4	SLHDALCVLAQTVK	1553.82	1553.82	-0.0023	64.8
121	TCPB_MOUSE	T-complex protein 1 subunit beta OS=Mus musculus GN=Cct2 PE=1 SV=4	SLHDALCVLAQTVK	1553.82	1553.82	-0.0017	62.91
121	TCPB_MOUSE	T-complex protein 1 subunit beta OS=Mus musculus GN=Cct2 PE=1 SV=4	LIHFSGVALGEACTIVLR	1955.06	1955.07	-0.0032	44.97
122	DYHC1_MOUSE	T-complex protein 1 subunit beta OS=Mus musculus GN=Cct2 PE=1 SV=4	LIHFSGVALGEACTIVLR	1955.06	1955.07	-0.0018	36.26
122	DYHC1_MOUSE	Cytoplasmic dynein 1 heavy chain 1 OS=Mus musculus GN=Dync1h1 PE=1 SV=2	LSCLPAFK	934.492	934.495	-0.0022	27.66
122	DYHC1_MOUSE	Cytoplasmic dynein 1 heavy chain 1 OS=Mus musculus GN=Dync1h1 PE=1 SV=2	TFDHYCEYR	1289.51	1289.51	-0.0019	25.53
122	DYHC1_MOUSE	Cytoplasmic dynein 1 heavy chain 1 OS=Mus musculus GN=Dync1h1 PE=1 SV=2	IQFVGACNPPTDPGR	1627.78	1627.78	-0.0027	66.97
122	DYHC1_MOUSE	Cytoplasmic dynein 1 heavy chain 1 OS=Mus musculus GN=Dync1h1 PE=1 SV=2	LALESICLLLGESTTDWK	2048.05	2048.05	-0.0009	26.77
122	DYHC1_MOUSE	Cytoplasmic dynein 1 heavy chain 1 OS=Mus musculus GN=Dync1h1 PE=1 SV=2	EAIVNSCVFVHQTLHQANAR	2293.14	2293.14	-0.0021	43.66
122	DYHC1_MOUSE	Cytoplasmic dynein 1 heavy chain 1 OS=Mus musculus GN=Dync1h1 PE=1 SV=2	HEALLYTWLAEHKPLVLCGPPGSGK	2772.44	2772.44	-0.0051	55.13
122	DYHC1_MOUSE	Cytoplasmic dynein 1 heavy chain 1 OS=Mus musculus GN=Dync1h1 PE=1 SV=2	HEALLYTWLAEHKPLVLCGPPGSGK	2772.44	2772.44	-0.0035	49.01
123	HDAC6_MOUSE	Cytoplasmic dynein 1 heavy chain 1 OS=Mus musculus GN=Dync1h1 PE=1 SV=2	HEALLYTWLAEHKPLVLCGPPGSGK	2772.44	2772.44	-0.0013	57.18
123	HDAC6_MOUSE	Histone deacetylase 6 OS=Mus musculus GN=Hdac6 PE=1 SV=3	CVSFQAR	866.406	866.407	-0.0007	34.26
123	HDAC6_MOUSE	Histone deacetylase 6 OS=Mus musculus GN=Hdac6 PE=1 SV=3	EGANFDSIYICPSTFACAK	2149.94	2149.94	-0.007	54.12
123	HDAC6_MOUSE	Histone deacetylase 6 OS=Mus musculus GN=Hdac6 PE=1 SV=3	EGANFDSIYICPSTFACAK	2149.94	2149.94	-0.0026	60.74
123	HDAC6_MOUSE	Histone deacetylase 6 OS=Mus musculus GN=Hdac6 PE=1 SV=3	VLAETYDSVYLHPNSYSCACLATGSVLR	3145.48	3145.48	-0.0082	64.34
124	DEST_MOUSE	Histone deacetylase 6 OS=Mus musculus GN=Hdac6 PE=1 SV=3	VPVGTGLVFDEQLNDFHCLWDDSFPESPER	3504.59	3504.59	-0.0079	61.97
124	DEST_MOUSE	Destrin OS=Mus musculus GN=Dstn PE=1 SV=3	AVIFCLSADK	1122.57	1122.57	-0.0027	69.91
124	DEST_MOUSE	Destrin OS=Mus musculus GN=Dstn PE=1 SV=3	AVIFCLSADK	1122.57	1122.57	-0.0021	63.8
124	DEST_MOUSE	Destrin OS=Mus musculus GN=Dstn PE=1 SV=3	AVIFCLSADKK	1250.67	1250.67	-0.0029	39.93
124	DEST_MOUSE	Destrin OS=Mus musculus GN=Dstn PE=1 SV=3	AVIFCLSADKK	1250.67	1250.67	-0.0022	24.22
124	DEST_MOUSE	Destrin OS=Mus musculus GN=Dstn PE=1 SV=3	ASGVQVADEVCR	1331.61	1331.61	-0.0024	66.77
125	PFKAL_MOUSE	Destrin OS=Mus musculus GN=Dstn PE=1 SV=3	ASGVQVADEVCR	1331.61	1331.61	-0.0019	58.17
125	PFKAL_MOUSE	ATP-dependent 6-phosphofructokinase, liver type OS=Mus musculus GN=Pfkl PE=1 SV=4	VFANAPDSACVIGLR	1588.8	1588.8	-0.0019	65.51
125	PFKAL_MOUSE	ATP-dependent 6-phosphofructokinase, liver type OS=Mus musculus GN=Pfkl PE=1 SV=4	VFANAPDSACVIGLR	1588.8	1588.8	-0.0017	72.12
125	PFKAL_MOUSE	ATP-dependent 6-phosphofructokinase, liver type OS=Mus musculus GN=Pfkl PE=1 SV=4	LAAAYNLLQHGITNLCVIGGDGSLTGANIFR	3228.67	3228.67	-0.0058	93.76
126	TAGL2_MOUSE	ATP-dependent 6-phosphofructokinase, liver type OS=Mus musculus GN=Pfkl PE=1 SV=4	LAAAYNLLQHGITNLCVIGGDGSLTGANIFR	3228.67	3228.67	-0.0025	62.97
126	TAGL2_MOUSE	Transgelin-2 OS=Mus musculus GN=Tagln2 PE=1 SV=4	QYDADLEQILIQWITTQCR	2393.16	2393.17	-0.0061	115.07
126	TAGL2_MOUSE	Transgelin-2 OS=Mus musculus GN=Tagln2 PE=1 SV=4	QYDADLEQILIQWITTQCR	2393.16	2393.17	-0.0046	75.95
126	TAGL2_MOUSE	Transgelin-2 OS=Mus musculus GN=Tagln2 PE=1 SV=4	QYDADLEQILIQWITTQCR	2393.16	2393.17	-0.0035	47.09
127	PCBP2_MOUSE	Transgelin-2 OS=Mus musculus GN=Tagln2 PE=1 SV=4	QYDADLEQILIQWITTQCR	2393.17	2393.17	-0.0033	47.99
127	PCBP2_MOUSE	Poly(rC)-binding protein 2 OS=Mus musculus GN=Pcbp2 PE=1 SV=1	INISEGNCPER	1287.59	1287.59	-0.0011	28.21
127	PCBP2_MOUSE	Poly(rC)-binding protein 2 OS=Mus musculus GN=Pcbp2 PE=1 SV=1	INISEGNCPER	1287.59	1287.59	-0.001	45.41
127	PCBP2_MOUSE	Poly(rC)-binding protein 2 OS=Mus musculus GN=Pcbp2 PE=1 SV=1	LVVPASQCGSLIGK	1427.78	1427.78	-0.0026	66.81
127	PCBP2_MOUSE	Poly(rC)-binding protein 2 OS=Mus musculus GN=Pcbp2 PE=1 SV=1	LVVPASQCGSLIGK	1427.78	1427.78	-0.0022	69.1
127	PCBP2_MOUSE	Poly(rC)-binding protein 2 OS=Mus musculus GN=Pcbp2 PE=1 SV=1	AITIAGIPQSIIECVK	1711.95	1711.95	-0.0027	67.38
128	SEC13_MOUSE	Poly(rC)-binding protein 2 OS=Mus musculus GN=Pcbp2 PE=1 SV=1	AITIAGIPQSIIECVK	1711.95	1711.95	-0.0014	44.66
128	SEC13_MOUSE	Protein SEC13 homolog OS=Mus musculus GN=Sec13 PE=2 SV=3	FASGGCDNLIK	1180.55	1180.55	-0.0018	27.46
128	SEC13_MOUSE	Protein SEC13 homolog OS=Mus musculus GN=Sec13 PE=2 SV=3	FASGGCDNLIK	1180.55	1180.55	-0.0016	43.1
128	SEC13_MOUSE	Protein SEC13 homolog OS=Mus musculus GN=Sec13 PE=2 SV=3	ESVDGQWVCISDVNK	1734.79	1734.79	-0.0031	62.9
128	SEC13_MOUSE	Protein SEC13 homolog OS=Mus musculus GN=Sec13 PE=2 SV=3	DVAWAPSIGLPTSTIASCSQDGR	2388.13	2388.14	-0.0043	71.68
128	SEC13_MOUSE	Protein SEC13 homolog OS=Mus musculus GN=Sec13 PE=2 SV=3	DVAWAPSIGLPTSTIASCSQDGR	2388.13	2388.14	-0.0041	71.08
129	RS11_MOUSE	Protein SEC13 homolog OS=Mus musculus GN=Sec13 PE=2 SV=3	GHEGPVWQVAWAHPMYGNILASCSYDR	3100.4	3100.41	-0.0078	48.6
129	RS11_MOUSE	40S ribosomal protein S11 OS=Mus musculus GN=Rps11 PE=1 SV=3	CPFTGNVSIR	1149.56	1149.56	-0.0025	49.94
129	RS11_MOUSE	40S ribosomal protein S11 OS=Mus musculus GN=Rps11 PE=1 SV=3	CPFTGNVSIR	1149.56	1149.56	-0.0023	51.41
129	RS11_MOUSE	40S ribosomal protein S11 OS=Mus musculus GN=Rps11 PE=1 SV=3	DVQIGDIVTVGECRPLSK	1985.02	1985.03	-0.003	30.12
129	RS11_MOUSE	40S ribosomal protein S11 OS=Mus musculus GN=Rps11 PE=1 SV=3	DVQIGDIVTVGECRPLSK	1985.02	1985.03	-0.003	90.48
129	RS11_MOUSE	40S ribosomal protein S11 OS=Mus musculus GN=Rps11 PE=1 SV=3	DVQIGDIVTVGECRPLSK	1985.02	1985.03	-0.0029	77.43
130	MDHM_MOUSE	40S ribosomal protein S11 OS=Mus musculus GN=Rps11 PE=1 SV=3	DVQIGDIVTVGECRPLSK	1985.02	1985.03	-0.0023	35.39
130	MDHM_MOUSE	Malate dehydrogenase, mitochondrial OS=Mus musculus GN=Mdh2 PE=1 SV=3	EGVVECSFVQSK	1367.64	1367.64	-0.0026	40.75
130	MDHM_MOUSE	Malate dehydrogenase, mitochondrial OS=Mus musculus GN=Mdh2 PE=1 SV=3	TIIPLISQCTPK	1369.76	1369.76	-0.0005	57.79
130	MDHM_MOUSE	Malate dehydrogenase, mitochondrial OS=Mus musculus GN=Mdh2 PE=1 SV=3	TIIPLISQCTPK	1369.76	1369.76	-0.0004	42.38
130	MDHM_MOUSE	Malate dehydrogenase, mitochondrial OS=Mus musculus GN=Mdh2 PE=1 SV=3	ETECTYFSTPLLLGK	1757.85	1757.85	-0.0031	76.39
130	MDHM_MOUSE	Malate dehydrogenase, mitochondrial OS=Mus musculus GN=Mdh2 PE=1 SV=3	ETECTYFSTPLLLGK	1757.85	1757.85	-0.0027	60.72
131	IGEB_MOUSE	Malate dehydrogenase, mitochondrial OS=Mus musculus GN=Mdh2 PE=1 SV=3	GYLGPEQLPDCLKGCDVVVIPAGVPR	2808.43	2808.43	-0.0044	40.63
131	IGEB_MOUSE	IgE-binding protein OS=Mus musculus GN=Iap PE=2 SV=1	FQQFCR	884.395	884.396	-0.0014	26.29
131	IGEB_MOUSE	IgE-binding protein OS=Mus musculus GN=Iap PE=2 SV=1	FQQFCR	884.395	884.396	-0.0014	25.65
131	IGEB_MOUSE	IgE-binding protein OS=Mus musculus GN=Iap PE=2 SV=1	QCADSFIPR	1092.5	1092.5	-0.002	63.67
131	IGEB_MOUSE	IgE-binding protein OS=Mus musculus GN=Iap PE=2 SV=1	QCADSFIPR	1092.5	1092.5	-0.002	54.99
131	IGEB_MOUSE	IgE-binding protein OS=Mus musculus GN=Iap PE=2 SV=1	LQGPPYAESPPCVVR	1668.83	1668.83	-0.0029	69.69
132	COPB_MOUSE	IgE-binding protein OS=Mus musculus GN=Iap PE=2 SV=1	LQGPPYAESPPCVVR	1668.83	1668.83	-0.0027	83.98
132	COPB_MOUSE	Coatomer subunit beta OS=Mus musculus GN=Copb1 PE=1 SV=1	GALWILGEYCSTK	1496.73	1496.73	-0.0016	64.78
132	COPB_MOUSE	Coatomer subunit beta OS=Mus musculus GN=Copb1 PE=1 SV=1	GALWILGEYCSTK	1496.73	1496.73	-0.0011	73.09
132	COPB_MOUSE	Coatomer subunit beta OS=Mus musculus GN=Copb1 PE=1 SV=1	CIYNLLQSSSPAVK	1578.81	1578.81	-0.0019	82.49
133	XPO2_MOUSE	Coatomer subunit beta OS=Mus musculus GN=Copb1 PE=1 SV=1	ALSGYCGFMAANLYAR	1763.81	1763.81	-0.0018	64.7
133	XPO2_MOUSE	Exportin-2 OS=Mus musculus GN=Cse1l PE=2 SV=1	AACDLVR	803.395	803.396	-0.0013	27.97
133	XPO2_MOUSE	Exportin-2 OS=Mus musculus GN=Cse1l PE=2 SV=1	AACDLVR	803.395	803.396	-0.0011	21.91
133	XPO2_MOUSE	Exportin-2 OS=Mus musculus GN=Cse1l PE=2 SV=1	SQICDNAALYAQK	1480.7	1480.7	-0.0016	54.94
133	XPO2_MOUSE	Exportin-2 OS=Mus musculus GN=Cse1l PE=2 SV=1	IVEDEPNKICEADR	1686.79	1686.79	-0.0027	68.68
133	XPO2_MOUSE	Exportin-2 OS=Mus musculus GN=Cse1l PE=2 SV=1	YDLLVSNAIQFLASVCERPHYK	2622.32	2622.33	-0.0037	47.72
133	XPO2_MOUSE	Exportin-2 OS=Mus musculus GN=Cse1l PE=2 SV=1	YDLLVSNAIQFLASVCERPHYK	2622.33	2622.33	0.0013	23.14
133	XPO2_MOUSE	Exportin-2 OS=Mus musculus GN=Cse1l PE=2 SV=1	LLQTDDEEEAGLLELLKSQICDNAALYAQK	3390.68	3390.69	-0.0051	52.67
134	NSF_MOUSE	Exportin-2 OS=Mus musculus GN=Cse1l PE=2 SV=1	LLQTDDEEEAGLLELLKSQICDNAALYAQK	3390.68	3390.69	-0.0036	80.47
134	NSF_MOUSE	Vesicle-fusing ATPase OS=Mus musculus GN=Nsf PE=1 SV=2	GILLYGPPGCGK	1230.64	1230.64	-0.002	29.67
134	NSF_MOUSE	Vesicle-fusing ATPase OS=Mus musculus GN=Nsf PE=1 SV=2	SQLSCVVVDDIER	1518.73	1518.73	-0.0016	103.19
134	NSF_MOUSE	Vesicle-fusing ATPase OS=Mus musculus GN=Nsf PE=1 SV=2	THPSVVPGCIAFSLPQR	1864.96	1864.96	-0.0021	30.52
134	NSF_MOUSE	Vesicle-fusing ATPase OS=Mus musculus GN=Nsf PE=1 SV=2	THPSVVPGCIAFSLPQR	1864.96	1864.96	-0.0021	26.23
134	NSF_MOUSE	Vesicle-fusing ATPase OS=Mus musculus GN=Nsf PE=1 SV=2	LGANSGLHIIIFDEIDAICK	2198.14	2198.14	-0.0026	66.71
135	INS1_MOUSE	Vesicle-fusing ATPase OS=Mus musculus GN=Nsf PE=1 SV=2	LGANSGLHIIIFDEIDAICK	2198.14	2198.14	-0.0019	66
135	INS1_MOUSE	Insulin-1 OS=Mus musculus GN=Ins1 PE=1 SV=1	QHLCGPHLVEALYLVCGER	2250.1	2250.1	-0.0024	35.48
135	INS1_MOUSE	Insulin-1 OS=Mus musculus GN=Ins1 PE=1 SV=1	GIVDQCCTSICSLYQLENYCN	2596.06	2596.07	-0.0054	43.91
135	INS1_MOUSE	Insulin-1 OS=Mus musculus GN=Ins1 PE=1 SV=1	GIVDQCCTSICSLYQLENYCN	2596.06	2596.07	-0.0053	20.98
135	INS1_MOUSE	Insulin-1 OS=Mus musculus GN=Ins1 PE=1 SV=1	GIVDQCCTSICSLYQLENYCN	2596.07	2596.07	-0.0037	29.66
135	INS1_MOUSE	Insulin-1 OS=Mus musculus GN=Ins1 PE=1 SV=1	GIVDQCCTSICSLYQLENYCN	2596.07	2596.07	-0.0037	78.82
135	INS1_MOUSE	Insulin-1 OS=Mus musculus GN=Ins1 PE=1 SV=1	GIVDQCCTSICSLYQLENYCN	2596.07	2596.07	-0.0037	51.75
136	RS12_MOUSE	Insulin-1 OS=Mus musculus GN=Ins1 PE=1 SV=1	GIVDQCCTSICSLYQLENYCN	2596.07	2596.07	-0.0024	67.63
136	RS12_MOUSE	40S ribosomal protein S12 OS=Mus musculus GN=Rps12 PE=1 SV=2	LGEWVGLCK	1060.54	1060.54	-0.0024	51.5
136	RS12_MOUSE	40S ribosomal protein S12 OS=Mus musculus GN=Rps12 PE=1 SV=2	LGEWVGLCK	1060.54	1060.54	-0.0021	64.88
136	RS12_MOUSE	40S ribosomal protein S12 OS=Mus musculus GN=Rps12 PE=1 SV=2	VVGCSCVVVK	1105.56	1105.56	-0.0023	50.74
136	RS12_MOUSE	40S ribosomal protein S12 OS=Mus musculus GN=Rps12 PE=1 SV=2	VVGCSCVVVK	1105.56	1105.56	-0.0019	54.02
136	RS12_MOUSE	40S ribosomal protein S12 OS=Mus musculus GN=Rps12 PE=1 SV=2	KVVGCSCVVVK	1233.66	1233.66	-0.0018	53.89
136	RS12_MOUSE	40S ribosomal protein S12 OS=Mus musculus GN=Rps12 PE=1 SV=2	KVVGCSCVVVK	1233.66	1233.66	-0.0018	45.21
137	IMA7_MOUSE	40S ribosomal protein S12 OS=Mus musculus GN=Rps12 PE=1 SV=2	KVVGCSCVVVK	1233.66	1233.66	-0.0014	31.08
137	IMA7_MOUSE	Importin subunit alpha-7 OS=Mus musculus GN=Kpna6 PE=1 SV=2	NAVWALSNLCR	1302.65	1302.65	-0.0017	41.17
137	IMA7_MOUSE	Importin subunit alpha-7 OS=Mus musculus GN=Kpna6 PE=1 SV=2	NAVWALSNLCR	1302.65	1302.65	-0.0014	45.89
137	IMA7_MOUSE	Importin subunit alpha-7 OS=Mus musculus GN=Kpna6 PE=1 SV=2	DYVLNCSILNPLLTLLTK	2089.15	2089.15	-0.0027	90.34
138	SDHA_MOUSE	Importin subunit alpha-7 OS=Mus musculus GN=Kpna6 PE=1 SV=2	DYVLNCSILNPLLTLLTK	2089.15	2089.15	-0.0012	106.87
138	SDHA_MOUSE	Succinate dehydrogenase [ubiquinone] flavoprotein subunit, mitochondrial OS=Mus musculus GN=Sdha PE=1 SV=1	VGSVLQEGCEK	1204.57	1204.58	-0.0025	51.01
138	SDHA_MOUSE	Succinate dehydrogenase [ubiquinone] flavoprotein subunit, mitochondrial OS=Mus musculus GN=Sdha PE=1 SV=1	GVIALCIEDGSIHR	1538.78	1538.79	-0.0032	42.57
138	SDHA_MOUSE	Succinate dehydrogenase [ubiquinone] flavoprotein subunit, mitochondrial OS=Mus musculus GN=Sdha PE=1 SV=1	GVIALCIEDGSIHR	1538.79	1538.79	-0.0025	26.08
138	SDHA_MOUSE	Succinate dehydrogenase [ubiquinone] flavoprotein subunit, mitochondrial OS=Mus musculus GN=Sdha PE=1 SV=1	ACALSIAESCRPGDK	1633.75	1633.76	-0.0038	23.53
138	SDHA_MOUSE	Succinate dehydrogenase [ubiquinone] flavoprotein subunit, mitochondrial OS=Mus musculus GN=Sdha PE=1 SV=1	ACALSIAESCRPGDK	1633.75	1633.76	-0.0029	24.63
138	SDHA_MOUSE	Succinate dehydrogenase [ubiquinone] flavoprotein subunit, mitochondrial OS=Mus musculus GN=Sdha PE=1 SV=1	ACALSIAESCRPGDK	1633.75	1633.76	-0.0022	25.77
138	SDHA_MOUSE	Succinate dehydrogenase [ubiquinone] flavoprotein subunit, mitochondrial OS=Mus musculus GN=Sdha PE=1 SV=1	AGLPCQDLEFVQFHPTGIYGAGCLITEGCR	3365.56	3365.56	-0.005	63.65
139	SERA_MOUSE	Succinate dehydrogenase [ubiquinone] flavoprotein subunit, mitochondrial OS=Mus musculus GN=Sdha PE=1 SV=1	AGLPCQDLEFVQFHPTGIYGAGCLITEGCR	3365.56	3365.56	-0.0047	62.93
139	SERA_MOUSE	D-3-phosphoglycerate dehydrogenase OS=Mus musculus GN=Phgdh PE=1 SV=3	QHVLEAFQFCF	1424.65	1424.65	-0.0025	27.51
139	SERA_MOUSE	D-3-phosphoglycerate dehydrogenase OS=Mus musculus GN=Phgdh PE=1 SV=3	QHVLEAFQFCF	1424.65	1424.65	-0.0011	34.28
139	SERA_MOUSE	D-3-phosphoglycerate dehydrogenase OS=Mus musculus GN=Phgdh PE=1 SV=3	NAGTCLSPAVIVGLLR	1639.91	1639.91	-0.0025	98.81
139	SERA_MOUSE	D-3-phosphoglycerate dehydrogenase OS=Mus musculus GN=Phgdh PE=1 SV=3	NAGTCLSPAVIVGLLR	1639.91	1639.91	-0.001	84.15
140	IPO9_MOUSE	D-3-phosphoglycerate dehydrogenase OS=Mus musculus GN=Phgdh PE=1 SV=3	EELIAELQDCEGLIVR	1885.94	1885.95	-0.0006	50.08
140	IPO9_MOUSE	Importin-9 OS=Mus musculus GN=Ipo9 PE=1 SV=3	AIWGYCDQLK	1252.59	1252.59	-0.0005	28.65
140	IPO9_MOUSE	Importin-9 OS=Mus musculus GN=Ipo9 PE=1 SV=3	IPAGLCATAIDILTTVVR	1883.05	1883.06	-0.0028	42.12
140	IPO9_MOUSE	Importin-9 OS=Mus musculus GN=Ipo9 PE=1 SV=3	IPAGLCATAIDILTTVVR	1883.05	1883.06	-0.0022	103.54
141	CALR_MOUSE	Importin-9 OS=Mus musculus GN=Ipo9 PE=1 SV=3	IPAGLCATAIDILTTVVR	1883.05	1883.06	-0.0021	105.86
141	CALR_MOUSE	Calreticulin OS=Mus musculus GN=Calr PE=1 SV=1	HEQNIDCGGGYVK	1475.64	1475.65	-0.0034	23.47
141	CALR_MOUSE	Calreticulin OS=Mus musculus GN=Calr PE=1 SV=1	HEQNIDCGGGYVK	1475.64	1475.65	-0.0029	57.15
141	CALR_MOUSE	Calreticulin OS=Mus musculus GN=Calr PE=1 SV=1	HEQNIDCGGGYVK	1475.64	1475.65	-0.0021	29.84
141	CALR_MOUSE	Calreticulin OS=Mus musculus GN=Calr PE=1 SV=1	HEQNIDCGGGYVK	1475.64	1475.65	-0.0018	58.27
141	CALR_MOUSE	Calreticulin OS=Mus musculus GN=Calr PE=1 SV=1	CKDDEFTHLYTLIVRPDNTYEVK	2855.37	2855.38	-0.0053	21.21
141	CALR_MOUSE	Calreticulin OS=Mus musculus GN=Calr PE=1 SV=1	CKDDEFTHLYTLIVRPDNTYEVK	2855.38	2855.38	-0.005	52.04
141	CALR_MOUSE	Calreticulin OS=Mus musculus GN=Calr PE=1 SV=1	CKDDEFTHLYTLIVRPDNTYEVK	2855.38	2855.38	-0.0044	51.12
141	CALR_MOUSE	Calreticulin OS=Mus musculus GN=Calr PE=1 SV=1	CKDDEFTHLYTLIVRPDNTYEVK	2855.38	2855.38	-0.0041	27.24
141	CALR_MOUSE	Calreticulin OS=Mus musculus GN=Calr PE=1 SV=1	CKDDEFTHLYTLIVRPDNTYEVK	2855.38	2855.38	-0.0036	30.13
142	ASNS_MOUSE	Calreticulin OS=Mus musculus GN=Calr PE=1 SV=1	CKDDEFTHLYTLIVRPDNTYEVK	2855.38	2855.38	-0.0036	32.37
142	ASNS_MOUSE	Asparagine synthetase [glutamine-hydrolyzing] OS=Mus musculus GN=Asns PE=2 SV=3	IGCLLSGGLDSSLVAASLLK	1973.08	1973.09	-0.002	75.7
142	ASNS_MOUSE	Asparagine synthetase [glutamine-hydrolyzing] OS=Mus musculus GN=Asns PE=2 SV=3	IGCLLSGGLDSSLVAASLLK	1973.09	1973.09	-0.0012	95.23
142	ASNS_MOUSE	Asparagine synthetase [glutamine-hydrolyzing] OS=Mus musculus GN=Asns PE=2 SV=3	FENVNGYTNCCFGFHR	2020.83	2020.83	-0.0024	52.41
142	ASNS_MOUSE	Asparagine synthetase [glutamine-hydrolyzing] OS=Mus musculus GN=Asns PE=2 SV=3	FENVNGYTNCCFGFHR	2020.83	2020.83	-0.0021	23.5
142	ASNS_MOUSE	Asparagine synthetase [glutamine-hydrolyzing] OS=Mus musculus GN=Asns PE=2 SV=3	YHHCTDEPLHAIYDSVEK	2212.98	2212.98	-0.0046	23.3
143	SYVC_MOUSE	Asparagine synthetase [glutamine-hydrolyzing] OS=Mus musculus GN=Asns PE=2 SV=3	YHHCTDEPLHAIYDSVEK	2212.98	2212.98	-0.004	33.46
143	SYVC_MOUSE	Valine--tRNA ligase OS=Mus musculus GN=Vars PE=2 SV=1	ICLQPPPSSR	1153.59	1153.59	-0.0024	26.15
143	SYVC_MOUSE	Valine--tRNA ligase OS=Mus musculus GN=Vars PE=2 SV=1	ICLQPPPSSR	1153.59	1153.59	-0.0018	25.66
143	SYVC_MOUSE	Valine--tRNA ligase OS=Mus musculus GN=Vars PE=2 SV=1	FGLCAYTSQGR	1258.57	1258.58	-0.0018	74
143	SYVC_MOUSE	Valine--tRNA ligase OS=Mus musculus GN=Vars PE=2 SV=1	LVNWSCTLNSAISDIEVDK	2163.05	2163.05	-0.0065	42.24
143	SYVC_MOUSE	Valine--tRNA ligase OS=Mus musculus GN=Vars PE=2 SV=1	AAVLVQQWVSYADTELIPAACGATLPALGLR	3253.71	3253.72	-0.0051	81.47
144	GDIR1_MOUSE	Valine--tRNA ligase OS=Mus musculus GN=Vars PE=2 SV=1	AAVLVQQWVSYADTELIPAACGATLPALGLR	3253.71	3253.72	-0.0051	74.67
144	GDIR1_MOUSE	Rho GDP-dissociation inhibitor 1 OS=Mus musculus GN=Arhgdia PE=1 SV=3	LTLVCSTAPGPLELDLTGDLESFK	2575.31	2575.31	-0.0034	92.05
144	GDIR1_MOUSE	Rho GDP-dissociation inhibitor 1 OS=Mus musculus GN=Arhgdia PE=1 SV=3	LTLVCSTAPGPLELDLTGDLESFK	2575.31	2575.31	-0.0031	76.5
144	GDIR1_MOUSE	Rho GDP-dissociation inhibitor 1 OS=Mus musculus GN=Arhgdia PE=1 SV=3	LTLVCSTAPGPLELDLTGDLESFK	2575.31	2575.31	-0.0029	49.31
145	ADH1_MOUSE	Rho GDP-dissociation inhibitor 1 OS=Mus musculus GN=Arhgdia PE=1 SV=3	LTLVCSTAPGPLELDLTGDLESFK	2575.31	2575.31	-0.0022	48.88
145	ADH1_MOUSE	Alcohol dehydrogenase 1 OS=Mus musculus GN=Adh1 PE=1 SV=2	HPESNFCSR	1132.47	1132.47	-0.0014	24.04
145	ADH1_MOUSE	Alcohol dehydrogenase 1 OS=Mus musculus GN=Adh1 PE=1 SV=2	ICKHPESNFCSR	1533.68	1533.68	-0.0024	35.35
145	ADH1_MOUSE	Alcohol dehydrogenase 1 OS=Mus musculus GN=Adh1 PE=1 SV=2	VIPLFSPQCGECR	1561.73	1561.74	-0.0032	33.12
145	ADH1_MOUSE	Alcohol dehydrogenase 1 OS=Mus musculus GN=Adh1 PE=1 SV=2	VIPLFSPQCGECR	1561.74	1561.74	-0.0021	39.18
145	ADH1_MOUSE	Alcohol dehydrogenase 1 OS=Mus musculus GN=Adh1 PE=1 SV=2	ELGATECINPQDYSK	1723.77	1723.77	-0.0036	51.85
145	ADH1_MOUSE	Alcohol dehydrogenase 1 OS=Mus musculus GN=Adh1 PE=1 SV=2	ELGATECINPQDYSK	1723.77	1723.77	-0.0023	49.35
145	ADH1_MOUSE	Alcohol dehydrogenase 1 OS=Mus musculus GN=Adh1 PE=1 SV=2	IDGASPLDKVCLIGCGFSTGYGSAVK	2671.29	2671.3	-0.0057	66.53
146	ARF4_MOUSE	Alcohol dehydrogenase 1 OS=Mus musculus GN=Adh1 PE=1 SV=2	IDGASPLDKVCLIGCGFSTGYGSAVK	2671.3	2671.3	-0.0028	50
146	ARF4_MOUSE	ADP-ribosylation factor 4 OS=Mus musculus GN=Arf4 PE=1 SV=2	NICFTVWDVGGQDK	1637.75	1637.75	-0.0029	83.14
146	ARF4_MOUSE	ADP-ribosylation factor 4 OS=Mus musculus GN=Arf4 PE=1 SV=2	NICFTVWDVGGQDK	1637.75	1637.75	-0.0021	87.55
147	PSMD2_MOUSE	ADP-ribosylation factor 4 OS=Mus musculus GN=Arf4 PE=1 SV=2	TWYVQATCATQGTGLYEGLDWLSNELSK	3190.49	3190.49	-0.0044	90
147	PSMD2_MOUSE	26S proteasome non-ATPase regulatory subunit 2 OS=Mus musculus GN=Psmd2 PE=1 SV=1	CALGVFR	821.42	821.422	-0.0015	32.16
147	PSMD2_MOUSE	26S proteasome non-ATPase regulatory subunit 2 OS=Mus musculus GN=Psmd2 PE=1 SV=1	CALGVFR	821.421	821.422	-0.0009	23.14
147	PSMD2_MOUSE	26S proteasome non-ATPase regulatory subunit 2 OS=Mus musculus GN=Psmd2 PE=1 SV=1	GTLTLCPYHSDR	1418.66	1418.66	-0.003	36.51
147	PSMD2_MOUSE	26S proteasome non-ATPase regulatory subunit 2 OS=Mus musculus GN=Psmd2 PE=1 SV=1	GTLTLCPYHSDR	1418.66	1418.66	-0.0025	30.41
147	PSMD2_MOUSE	26S proteasome non-ATPase regulatory subunit 2 OS=Mus musculus GN=Psmd2 PE=1 SV=1	SGALLACGIVNSGVR	1472.77	1472.78	-0.0029	59.54
147	PSMD2_MOUSE	26S proteasome non-ATPase regulatory subunit 2 OS=Mus musculus GN=Psmd2 PE=1 SV=1	SGALLACGIVNSGVR	1472.77	1472.78	-0.0021	68.14
148	DJC10_MOUSE	26S proteasome non-ATPase regulatory subunit 2 OS=Mus musculus GN=Psmd2 PE=1 SV=1	SFANTLVDVCAYAGSGNVLK	2085.02	2085.02	-0.0019	92.06
148	DJC10_MOUSE	DnaJ homolog subfamily C member 10 OS=Mus musculus GN=Dnajc10 PE=1 SV=2	GEDCLTSQTR	1165.5	1165.5	-0.0019	73.17
148	DJC10_MOUSE	DnaJ homolog subfamily C member 10 OS=Mus musculus GN=Dnajc10 PE=1 SV=2	GEDCLTSQTR	1165.5	1165.5	-0.0014	50.45
148	DJC10_MOUSE	DnaJ homolog subfamily C member 10 OS=Mus musculus GN=Dnajc10 PE=1 SV=2	FDCSSAPGICSDLYVFQPCLAVFK	2780.26	2780.26	-0.0084	56.42
148	DJC10_MOUSE	DnaJ homolog subfamily C member 10 OS=Mus musculus GN=Dnajc10 PE=1 SV=2	FDCSSAPGICSDLYVFQPCLAVFK	2780.26	2780.26	-0.0045	29.34
148	DJC10_MOUSE	DnaJ homolog subfamily C member 10 OS=Mus musculus GN=Dnajc10 PE=1 SV=2	FDCSSAPGICSDLYVFQPCLAVFK	2780.26	2780.26	-0.0043	35.02
148	DJC10_MOUSE	DnaJ homolog subfamily C member 10 OS=Mus musculus GN=Dnajc10 PE=1 SV=2	FDCSSAPGICSDLYVFQPCLAVFK	2780.26	2780.26	-0.0043	33.62
149	UMPS_MOUSE	DnaJ homolog subfamily C member 10 OS=Mus musculus GN=Dnajc10 PE=1 SV=2	TLTGLINVGSVDCQQYHSFCTQENVQR	3153.45	3153.46	-0.0066	45.29
149	UMPS_MOUSE	Uridine 5~-monophosphate synthase OS=Mus musculus GN=Umps PE=2 SV=3	LHAVCTLSQMLEILQQQEK	2268.16	2268.16	-0.0019	43.64
149	UMPS_MOUSE	Uridine 5~-monophosphate synthase OS=Mus musculus GN=Umps PE=2 SV=3	LHAVCTLSQMLEILQQQEK	2268.16	2268.16	-0.0013	52.49
149	UMPS_MOUSE	Uridine 5~-monophosphate synthase OS=Mus musculus GN=Umps PE=2 SV=3	LVEGEINPGQTCLVIEDVVTSGASVLETVEVLQK	3624.88	3624.88	-0.0051	50.12
149	UMPS_MOUSE	Uridine 5~-monophosphate synthase OS=Mus musculus GN=Umps PE=2 SV=3	LVEGEINPGQTCLVIEDVVTSGASVLETVEVLQK	3624.88	3624.88	-0.0015	57.8
149	UMPS_MOUSE	Uridine 5~-monophosphate synthase OS=Mus musculus GN=Umps PE=2 SV=3	NAGISFDSVCGVPYTALPLATVICSANHIPMLIR	3656.84	3656.85	-0.0094	73.31
150	RAC1_MOUSE	Uridine 5~-monophosphate synthase OS=Mus musculus GN=Umps PE=2 SV=3	NAGISFDSVCGVPYTALPLATVICSANHIPMLIR	3672.83	3672.85	-0.0126	36.77
150	RAC1_MOUSE	Ras-related C3 botulinum toxin substrate 1 OS=Mus musculus GN=Rac1 PE=1 SV=1	AVLCPPPVK	979.551	979.553	-0.0017	31.45
150	RAC1_MOUSE	Ras-related C3 botulinum toxin substrate 1 OS=Mus musculus GN=Rac1 PE=1 SV=1	AVLCPPPVK	979.551	979.553	-0.0013	26.51
150	RAC1_MOUSE	Ras-related C3 botulinum toxin substrate 1 OS=Mus musculus GN=Rac1 PE=1 SV=1	CVVVGDGAVGK	1059.54	1059.54	-0.0022	44.86
150	RAC1_MOUSE	Ras-related C3 botulinum toxin substrate 1 OS=Mus musculus GN=Rac1 PE=1 SV=1	CVVVGDGAVGK	1059.54	1059.54	-0.0022	30.98
150	RAC1_MOUSE	Ras-related C3 botulinum toxin substrate 1 OS=Mus musculus GN=Rac1 PE=1 SV=1	YLECSALTQR	1239.59	1239.59	-0.0019	65.12
150	RAC1_MOUSE	Ras-related C3 botulinum toxin substrate 1 OS=Mus musculus GN=Rac1 PE=1 SV=1	YLECSALTQR	1239.59	1239.59	-0.0013	51.28
150	RAC1_MOUSE	Ras-related C3 botulinum toxin substrate 1 OS=Mus musculus GN=Rac1 PE=1 SV=1	HHCPNTPIILVGTK	1585.84	1585.84	-0.0041	35.23
150	RAC1_MOUSE	Ras-related C3 botulinum toxin substrate 1 OS=Mus musculus GN=Rac1 PE=1 SV=1	HHCPNTPIILVGTK	1585.84	1585.84	-0.0036	35.53
150	RAC1_MOUSE	Ras-related C3 botulinum toxin substrate 1 OS=Mus musculus GN=Rac1 PE=1 SV=1	HHCPNTPIILVGTK	1585.84	1585.84	-0.0026	44.48
151	LKHA4_MOUSE	Ras-related C3 botulinum toxin substrate 1 OS=Mus musculus GN=Rac1 PE=1 SV=1	HHCPNTPIILVGTK	1585.84	1585.84	-0.0017	44.78
151	LKHA4_MOUSE	Leukotriene A-4 hydrolase OS=Mus musculus GN=Lta4h PE=1 SV=4	CSVDFAR	853.374	853.375	-0.0011	25.33
151	LKHA4_MOUSE	Leukotriene A-4 hydrolase OS=Mus musculus GN=Lta4h PE=1 SV=4	AILPCQDTPSVK	1327.68	1327.68	-0.0029	34.09
151	LKHA4_MOUSE	Leukotriene A-4 hydrolase OS=Mus musculus GN=Lta4h PE=1 SV=4	AILPCQDTPSVK	1327.68	1327.68	-0.0025	30.31
151	LKHA4_MOUSE	Leukotriene A-4 hydrolase OS=Mus musculus GN=Lta4h PE=1 SV=4	VPIPCYLIALVVGALESR	1969.1	1969.11	-0.0037	58.87
151	LKHA4_MOUSE	Leukotriene A-4 hydrolase OS=Mus musculus GN=Lta4h PE=1 SV=4	VPIPCYLIALVVGALESR	1969.1	1969.11	-0.0033	101.1
152	DDX3X_MOUSE	Leukotriene A-4 hydrolase OS=Mus musculus GN=Lta4h PE=1 SV=4	VPIPCYLIALVVGALESR	1969.1	1969.11	-0.0026	49.29
152	DDX3X_MOUSE	ATP-dependent RNA helicase DDX3X OS=Mus musculus GN=Ddx3x PE=1 SV=3	GCHLLVATPGR	1179.62	1179.62	-0.0024	23.08
152	DDX3X_MOUSE	ATP-dependent RNA helicase DDX3X OS=Mus musculus GN=Ddx3x PE=1 SV=3	GCHLLVATPGR	1179.62	1179.62	-0.0021	55.01
152	DDX3X_MOUSE	ATP-dependent RNA helicase DDX3X OS=Mus musculus GN=Ddx3x PE=1 SV=3	GCHLLVATPGR	1179.62	1179.62	-0.0015	45.13
152	DDX3X_MOUSE	ATP-dependent RNA helicase DDX3X OS=Mus musculus GN=Ddx3x PE=1 SV=3	DLERGCHLLVATPGR	1692.87	1692.87	-0.0045	23.04
152	DDX3X_MOUSE	ATP-dependent RNA helicase DDX3X OS=Mus musculus GN=Ddx3x PE=1 SV=3	VRPCVVYGGAEIGQQIR	1900.99	1900.99	-0.0033	71.43
152	DDX3X_MOUSE	ATP-dependent RNA helicase DDX3X OS=Mus musculus GN=Ddx3x PE=1 SV=3	VRPCVVYGGAEIGQQIR	1900.99	1900.99	-0.003	59.22
152	DDX3X_MOUSE	ATP-dependent RNA helicase DDX3X OS=Mus musculus GN=Ddx3x PE=1 SV=3	VRPCVVYGGAEIGQQIR	1900.99	1900.99	-0.0029	51.51
153	GMDS_MOUSE	ATP-dependent RNA helicase DDX3X OS=Mus musculus GN=Ddx3x PE=1 SV=3	VRPCVVYGGAEIGQQIR	1900.99	1900.99	-0.0018	36
153	GMDS_MOUSE	GDP-mannose 4,6 dehydratase OS=Mus musculus GN=Gmds PE=2 SV=1	TCGLINSVK	990.515	990.517	-0.0016	37.48
153	GMDS_MOUSE	GDP-mannose 4,6 dehydratase OS=Mus musculus GN=Gmds PE=2 SV=1	LHYGDLTDSTCLVK	1620.78	1620.78	-0.0041	44.68
153	GMDS_MOUSE	GDP-mannose 4,6 dehydratase OS=Mus musculus GN=Gmds PE=2 SV=1	LHYGDLTDSTCLVK	1620.78	1620.78	-0.0034	59.08
153	GMDS_MOUSE	GDP-mannose 4,6 dehydratase OS=Mus musculus GN=Gmds PE=2 SV=1	LLDAIKTCGLINSVK	1643.92	1643.93	-0.0031	31.73
153	GMDS_MOUSE	GDP-mannose 4,6 dehydratase OS=Mus musculus GN=Gmds PE=2 SV=1	IYLGQLECFSLGNLDAK	1939.97	1939.97	-0.0025	89.62
154	QCR1_MOUSE	GDP-mannose 4,6 dehydratase OS=Mus musculus GN=Gmds PE=2 SV=1	YYRPTEVDFLQGDCSK	1976.89	1976.89	-0.001	46.56
154	QCR1_MOUSE	Cytochrome b-c1 complex subunit 1, mitochondrial OS=Mus musculus GN=Uqcrc1 PE=1 SV=2	LCTSATESEVTR	1352.62	1352.62	-0.0017	66.71
154	QCR1_MOUSE	Cytochrome b-c1 complex subunit 1, mitochondrial OS=Mus musculus GN=Uqcrc1 PE=1 SV=2	LCTSATESEVTR	1352.62	1352.62	-0.0014	64.14
154	QCR1_MOUSE	Cytochrome b-c1 complex subunit 1, mitochondrial OS=Mus musculus GN=Uqcrc1 PE=1 SV=2	VYEEDAVPGLTPCR	1604.75	1604.75	-0.0023	32.08
154	QCR1_MOUSE	Cytochrome b-c1 complex subunit 1, mitochondrial OS=Mus musculus GN=Uqcrc1 PE=1 SV=2	VYEEDAVPGLTPCR	1604.75	1604.75	-0.0013	26.84
154	QCR1_MOUSE	Cytochrome b-c1 complex subunit 1, mitochondrial OS=Mus musculus GN=Uqcrc1 PE=1 SV=2	NALVSHLDGTTPVCEDIGR	2052.99	2052.99	-0.0042	77.75
154	QCR1_MOUSE	Cytochrome b-c1 complex subunit 1, mitochondrial OS=Mus musculus GN=Uqcrc1 PE=1 SV=2	NALVSHLDGTTPVCEDIGR	2052.99	2052.99	-0.0032	32.79
155	MBB1A_MOUSE	Cytochrome b-c1 complex subunit 1, mitochondrial OS=Mus musculus GN=Uqcrc1 PE=1 SV=2	NALVSHLDGTTPVCEDIGR	2052.99	2052.99	-0.0017	25.87
155	MBB1A_MOUSE	Myb-binding protein 1A OS=Mus musculus GN=Mybbp1a PE=1 SV=2	SVFGHICPHLTPR	1519.77	1519.77	-0.0028	27.9
155	MBB1A_MOUSE	Myb-binding protein 1A OS=Mus musculus GN=Mybbp1a PE=1 SV=2	SVFGHICPHLTPR	1519.77	1519.77	-0.0025	30.42
155	MBB1A_MOUSE	Myb-binding protein 1A OS=Mus musculus GN=Mybbp1a PE=1 SV=2	VCFEDPEWEQLITQLLGK	2204.08	2204.08	-0.0025	53.59
155	MBB1A_MOUSE	Myb-binding protein 1A OS=Mus musculus GN=Mybbp1a PE=1 SV=2	VCFEDPEWEQLITQLLGK	2204.08	2204.08	-0.0024	79.56
155	MBB1A_MOUSE	Myb-binding protein 1A OS=Mus musculus GN=Mybbp1a PE=1 SV=2	VCFEDPEWEQLITQLLGK	2204.08	2204.08	-0.0021	71.05
156	UCHL3_MOUSE	Myb-binding protein 1A OS=Mus musculus GN=Mybbp1a PE=1 SV=2	VCFEDPEWEQLITQLLGK	2204.08	2204.08	-0.001	48.13
156	UCHL3_MOUSE	Ubiquitin carboxyl-terminal hydrolase isozyme L3 OS=Mus musculus GN=Uchl3 PE=1 SV=2	PVCAVLLLFPITEK	1598.91	1598.91	-0.0035	42.02
156	UCHL3_MOUSE	Ubiquitin carboxyl-terminal hydrolase isozyme L3 OS=Mus musculus GN=Uchl3 PE=1 SV=2	PVCAVLLLFPITEK	1598.91	1598.91	-0.0029	38.99
156	UCHL3_MOUSE	Ubiquitin carboxyl-terminal hydrolase isozyme L3 OS=Mus musculus GN=Uchl3 PE=1 SV=2	PVCAVLLLFPITEK	1598.91	1598.91	-0.0023	79.34
156	UCHL3_MOUSE	Ubiquitin carboxyl-terminal hydrolase isozyme L3 OS=Mus musculus GN=Uchl3 PE=1 SV=2	PVCAVLLLFPITEK	1598.91	1598.91	-0.0022	65.73
156	UCHL3_MOUSE	Ubiquitin carboxyl-terminal hydrolase isozyme L3 OS=Mus musculus GN=Uchl3 PE=1 SV=2	QTISNACGTIGLIHAIANNK	2095.08	2095.08	-0.0036	30.23
157	SEGN_MOUSE	Ubiquitin carboxyl-terminal hydrolase isozyme L3 OS=Mus musculus GN=Uchl3 PE=1 SV=2	QTISNACGTIGLIHAIANNK	2095.08	2095.08	-0.0016	35.41
157	SEGN_MOUSE	Secretagogin OS=Mus musculus GN=Scgn PE=2 SV=1	LDAACFWQIWQR	1592.75	1592.76	-0.0022	56.81
157	SEGN_MOUSE	Secretagogin OS=Mus musculus GN=Scgn PE=2 SV=1	LDAACFWQIWQR	1592.75	1592.76	-0.0019	59.99
157	SEGN_MOUSE	Secretagogin OS=Mus musculus GN=Scgn PE=2 SV=1	YDADSSGFISAAELCNFLR	2134.96	2134.96	-0.0046	74.25
158	ENPL_MOUSE	Secretagogin OS=Mus musculus GN=Scgn PE=2 SV=1	YDADSSGFISAAELCNFLR	2134.96	2134.96	-0.0014	78.43
158	ENPL_MOUSE	Endoplasmin OS=Mus musculus GN=Hsp90b1 PE=1 SV=2	LTESPCALVASQYGWSGNMER	2355.06	2355.06	-0.0032	61.57
158	ENPL_MOUSE	Endoplasmin OS=Mus musculus GN=Hsp90b1 PE=1 SV=2	LTESPCALVASQYGWSGNMER	2355.06	2355.06	-0.0021	51.43
158	ENPL_MOUSE	Endoplasmin OS=Mus musculus GN=Hsp90b1 PE=1 SV=2	LTESPCALVASQYGWSGNMER	2355.06	2355.06	-0.0015	56.97
158	ENPL_MOUSE	Endoplasmin OS=Mus musculus GN=Hsp90b1 PE=1 SV=2	LTESPCALVASQYGWSGNMER	2355.06	2355.06	-0.0014	44.66
158	ENPL_MOUSE	Endoplasmin OS=Mus musculus GN=Hsp90b1 PE=1 SV=2	GYEVIYLTEPVDEYCIQALPEFDGK	2947.38	2947.38	-0.0074	38.46
159	HNRL2_MOUSE	Endoplasmin OS=Mus musculus GN=Hsp90b1 PE=1 SV=2	GYEVIYLTEPVDEYCIQALPEFDGK	2947.38	2947.38	-0.0039	37.03
159	HNRL2_MOUSE	Heterogeneous nuclear ribonucleoprotein U-like protein 2 OS=Mus musculus GN=Hnrnpul2 PE=1 SV=2	DLLVQQASQCLSK	1488.76	1488.76	-0.0027	45.81
159	HNRL2_MOUSE	Heterogeneous nuclear ribonucleoprotein U-like protein 2 OS=Mus musculus GN=Hnrnpul2 PE=1 SV=2	DLLVQQASQCLSK	1488.76	1488.76	-0.0015	89.75
159	HNRL2_MOUSE	Heterogeneous nuclear ribonucleoprotein U-like protein 2 OS=Mus musculus GN=Hnrnpul2 PE=1 SV=2	NFILDQCNVYNSGQR	1826.83	1826.84	-0.0031	67.64
160	SYTC_MOUSE	Heterogeneous nuclear ribonucleoprotein U-like protein 2 OS=Mus musculus GN=Hnrnpul2 PE=1 SV=2	NFILDQCNVYNSGQR	1826.83	1826.84	-0.002	60.5
160	SYTC_MOUSE	Threonine--tRNA ligase, cytoplasmic OS=Mus musculus GN=Tars PE=1 SV=2	CGPLIDLCR	1102.52	1102.53	-0.002	46.61
160	SYTC_MOUSE	Threonine--tRNA ligase, cytoplasmic OS=Mus musculus GN=Tars PE=1 SV=2	CGPLIDLCRGPHVR	1648.83	1648.83	-0.0037	21.21
160	SYTC_MOUSE	Threonine--tRNA ligase, cytoplasmic OS=Mus musculus GN=Tars PE=1 SV=2	DQELYFFHELSPGSCFFLPK	2460.14	2460.15	-0.0073	54.08
160	SYTC_MOUSE	Threonine--tRNA ligase, cytoplasmic OS=Mus musculus GN=Tars PE=1 SV=2	DQELYFFHELSPGSCFFLPK	2460.14	2460.15	-0.0041	65.11
160	SYTC_MOUSE	Threonine--tRNA ligase, cytoplasmic OS=Mus musculus GN=Tars PE=1 SV=2	DQELYFFHELSPGSCFFLPK	2460.14	2460.15	-0.002	53.17
161	CDC42_MOUSE	Threonine--tRNA ligase, cytoplasmic OS=Mus musculus GN=Tars PE=1 SV=2	DQELYFFHELSPGSCFFLPK	2460.14	2460.15	-0.001	54.47
161	CDC42_MOUSE	Cell division control protein 42 homolog OS=Mus musculus GN=Cdc42 PE=1 SV=2	CVVVGDGAVGK	1059.54	1059.54	-0.0022	44.86
161	CDC42_MOUSE	Cell division control protein 42 homolog OS=Mus musculus GN=Cdc42 PE=1 SV=2	CVVVGDGAVGK	1059.54	1059.54	-0.0022	30.98
161	CDC42_MOUSE	Cell division control protein 42 homolog OS=Mus musculus GN=Cdc42 PE=1 SV=2	YVECSALTQK	1197.57	1197.57	-0.002	43.81
161	CDC42_MOUSE	Cell division control protein 42 homolog OS=Mus musculus GN=Cdc42 PE=1 SV=2	YVECSALTQK	1197.57	1197.57	-0.002	46.4
161	CDC42_MOUSE	Cell division control protein 42 homolog OS=Mus musculus GN=Cdc42 PE=1 SV=2	TCLLISYTTNK	1312.67	1312.67	-0.0025	59.86
161	CDC42_MOUSE	Cell division control protein 42 homolog OS=Mus musculus GN=Cdc42 PE=1 SV=2	TCLLISYTTNK	1312.67	1312.67	-0.0017	50.98
161	CDC42_MOUSE	Cell division control protein 42 homolog OS=Mus musculus GN=Cdc42 PE=1 SV=2	LRPLSYPQTDVFLVCFSVVSPSSFENVK	3214.63	3214.64	-0.0064	24.25
162	UB2D2_MOUSE	Cell division control protein 42 homolog OS=Mus musculus GN=Cdc42 PE=1 SV=2	LRPLSYPQTDVFLVCFSVVSPSSFENVK	3214.64	3214.64	-0.0013	44.59
162	UB2D2_MOUSE	Ubiquitin-conjugating enzyme E2 D2 OS=Mus musculus GN=Ube2d2 PE=1 SV=1	IYHPNINSNGSICLDILR	2098.06	2098.06	-0.0045	51.26
162	UB2D2_MOUSE	Ubiquitin-conjugating enzyme E2 D2 OS=Mus musculus GN=Ube2d2 PE=1 SV=1	IYHPNINSNGSICLDILR	2098.06	2098.06	-0.0028	39.6
162	UB2D2_MOUSE	Ubiquitin-conjugating enzyme E2 D2 OS=Mus musculus GN=Ube2d2 PE=1 SV=1	IYHPNINSNGSICLDILR	2098.06	2098.06	-0.0021	41.43
162	UB2D2_MOUSE	Ubiquitin-conjugating enzyme E2 D2 OS=Mus musculus GN=Ube2d2 PE=1 SV=1	VLLSICSLLCDPNPDDPLVPEIAR	2705.37	2705.38	-0.0049	70.6
163	MCM6_MOUSE	Ubiquitin-conjugating enzyme E2 D2 OS=Mus musculus GN=Ube2d2 PE=1 SV=1	VLLSICSLLCDPNPDDPLVPEIAR	2705.37	2705.38	-0.0034	74.38
163	MCM6_MOUSE	DNA replication licensing factor MCM6 OS=Mus musculus GN=Mcm6 PE=1 SV=1	LGFAEYCR	1014.46	1014.46	-0.0016	39.64
163	MCM6_MOUSE	DNA replication licensing factor MCM6 OS=Mus musculus GN=Mcm6 PE=1 SV=1	GDINVCIVGDPSTAK	1544.75	1544.75	-0.0003	45.7
163	MCM6_MOUSE	DNA replication licensing factor MCM6 OS=Mus musculus GN=Mcm6 PE=1 SV=1	LVFLACHVAPTNPR	1593.84	1593.85	-0.0035	34.94
163	MCM6_MOUSE	DNA replication licensing factor MCM6 OS=Mus musculus GN=Mcm6 PE=1 SV=1	LVFLACHVAPTNPR	1593.84	1593.85	-0.0025	40.52
163	MCM6_MOUSE	DNA replication licensing factor MCM6 OS=Mus musculus GN=Mcm6 PE=1 SV=1	LVFLACHVAPTNPR	1593.84	1593.85	-0.0022	59.35
163	MCM6_MOUSE	DNA replication licensing factor MCM6 OS=Mus musculus GN=Mcm6 PE=1 SV=1	NLYHNLCTSLFPTIHGNDEVK	2471.18	2471.19	-0.0057	55.81
164	DDX17_MOUSE	DNA replication licensing factor MCM6 OS=Mus musculus GN=Mcm6 PE=1 SV=1	NLYHNLCTSLFPTIHGNDEVK	2471.19	2471.19	-0.0019	36.14
164	DDX17_MOUSE	Probable ATP-dependent RNA helicase DDX17 OS=Mus musculus GN=Ddx17 PE=2 SV=1	STCIYGGAPK	1052.49	1052.5	-0.0022	47.6
164	DDX17_MOUSE	Probable ATP-dependent RNA helicase DDX17 OS=Mus musculus GN=Ddx17 PE=2 SV=1	STCIYGGAPK	1052.49	1052.5	-0.0016	50.94
164	DDX17_MOUSE	Probable ATP-dependent RNA helicase DDX17 OS=Mus musculus GN=Ddx17 PE=2 SV=1	GVEICIATPGR	1171.6	1171.6	-0.0022	58.1
164	DDX17_MOUSE	Probable ATP-dependent RNA helicase DDX17 OS=Mus musculus GN=Ddx17 PE=2 SV=1	CTYLVLDEADR	1353.62	1353.62	-0.0024	22.35
164	DDX17_MOUSE	Probable ATP-dependent RNA helicase DDX17 OS=Mus musculus GN=Ddx17 PE=2 SV=1	GDGPICLVLAPTR	1367.72	1367.72	-0.0017	55.7
165	ERP44_MOUSE	Probable ATP-dependent RNA helicase DDX17 OS=Mus musculus GN=Ddx17 PE=2 SV=1	GDGPICLVLAPTR	1367.72	1367.72	-0.0014	64.87
165	ERP44_MOUSE	Endoplasmic reticulum resident protein 44 OS=Mus musculus GN=Erp44 PE=1 SV=1	VDCDQHSDIAQR	1442.62	1442.62	-0.0019	31.47
165	ERP44_MOUSE	Endoplasmic reticulum resident protein 44 OS=Mus musculus GN=Erp44 PE=1 SV=1	VDCDQHSDIAQR	1442.62	1442.62	-0.0017	58.26
165	ERP44_MOUSE	Endoplasmic reticulum resident protein 44 OS=Mus musculus GN=Erp44 PE=1 SV=1	VDCDQHSDIAQR	1442.62	1442.62	-0.0014	42.89
165	ERP44_MOUSE	Endoplasmic reticulum resident protein 44 OS=Mus musculus GN=Erp44 PE=1 SV=1	TPADCPVIAIDSFR	1560.76	1560.76	-0.0025	55.83
165	ERP44_MOUSE	Endoplasmic reticulum resident protein 44 OS=Mus musculus GN=Erp44 PE=1 SV=1	VASILHDDCAFLSAFGDLSKPER	2547.24	2547.24	-0.0041	29.48
165	ERP44_MOUSE	Endoplasmic reticulum resident protein 44 OS=Mus musculus GN=Erp44 PE=1 SV=1	VASILHDDCAFLSAFGDLSKPER	2547.24	2547.24	-0.004	54.72
165	ERP44_MOUSE	Endoplasmic reticulum resident protein 44 OS=Mus musculus GN=Erp44 PE=1 SV=1	VASILHDDCAFLSAFGDLSKPER	2547.24	2547.24	-0.0039	28.37
166	FLNB_MOUSE	Endoplasmic reticulum resident protein 44 OS=Mus musculus GN=Erp44 PE=1 SV=1	VASILHDDCAFLSAFGDLSKPER	2547.24	2547.24	-0.0028	22.66
166	FLNB_MOUSE	Filamin-B OS=Mus musculus GN=Flnb PE=1 SV=3	IAGPGLSSCVR	1115.57	1115.58	-0.0021	34.08
166	FLNB_MOUSE	Filamin-B OS=Mus musculus GN=Flnb PE=1 SV=3	VVPCLVAPVAGR	1236.7	1236.7	-0.0018	21.06
166	FLNB_MOUSE	Filamin-B OS=Mus musculus GN=Flnb PE=1 SV=3	CLATGPGIAPTVK	1283.69	1283.69	-0.0023	47.68
166	FLNB_MOUSE	Filamin-B OS=Mus musculus GN=Flnb PE=1 SV=3	IEYDDQNDGSCDVK	1656.65	1656.66	-0.0031	85.74
166	FLNB_MOUSE	Filamin-B OS=Mus musculus GN=Flnb PE=1 SV=3	GAGTGGLGLTVEGPCEAK	1672.81	1672.81	-0.0027	49.52
166	FLNB_MOUSE	Filamin-B OS=Mus musculus GN=Flnb PE=1 SV=3	AQITNPSGASTECFVK	1708.8	1708.81	-0.0094	35.9
167	6PGL_MOUSE	Filamin-B OS=Mus musculus GN=Flnb PE=1 SV=3	AQITNPSGASTECFVK	1708.8	1708.81	-0.0062	39.98
167	6PGL_MOUSE	6-phosphogluconolactonase OS=Mus musculus GN=Pgls PE=2 SV=1	AASCLEGDR	977.423	977.424	-0.0012	48.42
167	6PGL_MOUSE	6-phosphogluconolactonase OS=Mus musculus GN=Pgls PE=2 SV=1	WTLGFCDER	1182.51	1182.51	-0.0021	36.35
167	6PGL_MOUSE	6-phosphogluconolactonase OS=Mus musculus GN=Pgls PE=2 SV=1	WTLGFCDER	1182.51	1182.51	-0.0017	39.74
167	6PGL_MOUSE	6-phosphogluconolactonase OS=Mus musculus GN=Pgls PE=2 SV=1	TGALCWFLDEAAAR	1579.74	1579.75	-0.0024	88.35
168	STIP1_MOUSE	6-phosphogluconolactonase OS=Mus musculus GN=Pgls PE=2 SV=1	TGALCWFLDEAAAR	1579.74	1579.75	-0.0016	64.57
168	STIP1_MOUSE	Stress-induced-phosphoprotein 1 OS=Mus musculus GN=Stip1 PE=1 SV=1	ALDLDSSCK	1007.46	1007.46	-0.0014	41.98
168	STIP1_MOUSE	Stress-induced-phosphoprotein 1 OS=Mus musculus GN=Stip1 PE=1 SV=1	ALSAGNIDDALQCYSEAIK	2037.97	2037.97	-0.0023	97.99
169	MCM5_MOUSE	Stress-induced-phosphoprotein 1 OS=Mus musculus GN=Stip1 PE=1 SV=1	ALSAGNIDDALQCYSEAIK	2037.97	2037.97	-0.0014	101
169	MCM5_MOUSE	DNA replication licensing factor MCM5 OS=Mus musculus GN=Mcm5 PE=2 SV=1	ISIQCR	775.4	775.401	-0.0011	32.25
169	MCM5_MOUSE	DNA replication licensing factor MCM5 OS=Mus musculus GN=Mcm5 PE=2 SV=1	AIACLLFGGSR	1163.61	1163.61	-0.0025	76
169	MCM5_MOUSE	DNA replication licensing factor MCM5 OS=Mus musculus GN=Mcm5 PE=2 SV=1	AIACLLFGGSR	1163.61	1163.61	-0.002	86.88
170	GNAI2_MOUSE	DNA replication licensing factor MCM5 OS=Mus musculus GN=Mcm5 PE=2 SV=1	CSVLAAANSVFGR	1350.67	1350.67	-0.0026	72.62
170	GNAI2_MOUSE	Guanine nucleotide-binding protein G(i) subunit alpha-2 OS=Mus musculus GN=Gnai2 PE=1 SV=5	LFDSICNNK	1109.52	1109.52	-0.0025	51.75
170	GNAI2_MOUSE	Guanine nucleotide-binding protein G(i) subunit alpha-2 OS=Mus musculus GN=Gnai2 PE=1 SV=5	LWADHGVQACFGR	1515.7	1515.7	-0.0024	30.1
170	GNAI2_MOUSE	Guanine nucleotide-binding protein G(i) subunit alpha-2 OS=Mus musculus GN=Gnai2 PE=1 SV=5	LWADHGVQACFGR	1515.7	1515.7	-0.0023	57.34
170	GNAI2_MOUSE	Guanine nucleotide-binding protein G(i) subunit alpha-2 OS=Mus musculus GN=Gnai2 PE=1 SV=5	LWADHGVQACFGR	1515.7	1515.7	-0.0015	56.51
170	GNAI2_MOUSE	Guanine nucleotide-binding protein G(i) subunit alpha-2 OS=Mus musculus GN=Gnai2 PE=1 SV=5	EIYTHFTCATDTK	1585.71	1585.71	-0.0024	33.49
171	SAHH2_MOUSE	Guanine nucleotide-binding protein G(i) subunit alpha-2 OS=Mus musculus GN=Gnai2 PE=1 SV=5	ITQSSLTICFPEYTGANK	2028.98	2028.98	-0.0033	56.92
171	SAHH2_MOUSE	Putative adenosylhomocysteinase 2 OS=Mus musculus GN=Ahcyl1 PE=1 SV=1	FDNLYCCR	1146.46	1146.46	-0.0025	32.36
171	SAHH2_MOUSE	Putative adenosylhomocysteinase 2 OS=Mus musculus GN=Ahcyl1 PE=1 SV=1	GESEDDFWWCIDR	1713.67	1713.67	-0.0026	36.59
171	SAHH2_MOUSE	Putative adenosylhomocysteinase 2 OS=Mus musculus GN=Ahcyl1 PE=1 SV=1	GESEDDFWWCIDR	1713.67	1713.67	-0.0017	54.9
171	SAHH2_MOUSE	Putative adenosylhomocysteinase 2 OS=Mus musculus GN=Ahcyl1 PE=1 SV=1	FDNLYCCRESILDGLK	2001.92	2001.93	-0.004	21.7
171	SAHH2_MOUSE	Putative adenosylhomocysteinase 2 OS=Mus musculus GN=Ahcyl1 PE=1 SV=1	IVGCTHITAQTAVLIETLCALGAQCR	2855.44	2855.45	-0.003	61.7
171	SAHH2_MOUSE	Putative adenosylhomocysteinase 2 OS=Mus musculus GN=Ahcyl1 PE=1 SV=1	WSACNIYSTQNEVAAALAEAGVAVFAWK	3026.46	3026.46	-0.0004	41.32
172	EIF1_MOUSE	Putative adenosylhomocysteinase 2 OS=Mus musculus GN=Ahcyl1 PE=1 SV=1	WSACNIYSTQNEVAAALAEAGVAVFAWK	3026.46	3026.46	0	62.16
172	EIF1_MOUSE	Eukaryotic translation initiation factor 1 OS=Mus musculus GN=Eif1 PE=2 SV=2	NICQFLIEIGLAK	1517.83	1517.83	-0.0021	45.26
172	EIF1_MOUSE	Eukaryotic translation initiation factor 1 OS=Mus musculus GN=Eif1 PE=2 SV=2	NICQFLIEIGLAK	1517.83	1517.83	-0.002	78.28
172	EIF1_MOUSE	Eukaryotic translation initiation factor 1 OS=Mus musculus GN=Eif1 PE=2 SV=2	NICQFLIEIGLAK	1517.83	1517.83	-0.0008	82.81
173	DHX9_MOUSE	Eukaryotic translation initiation factor 1 OS=Mus musculus GN=Eif1 PE=2 SV=2	KNICQFLIEIGLAK	1645.92	1645.92	-0.0031	53.09
173	DHX9_MOUSE	ATP-dependent RNA helicase A OS=Mus musculus GN=Dhx9 PE=1 SV=2	SCGYSVR	827.359	827.36	-0.0007	20.77
173	DHX9_MOUSE	ATP-dependent RNA helicase A OS=Mus musculus GN=Dhx9 PE=1 SV=2	SCGYSVR	827.359	827.36	-0.0004	21.39
173	DHX9_MOUSE	ATP-dependent RNA helicase A OS=Mus musculus GN=Dhx9 PE=1 SV=2	NFLYAWCGK	1157.53	1157.53	-0.0023	36.51
173	DHX9_MOUSE	ATP-dependent RNA helicase A OS=Mus musculus GN=Dhx9 PE=1 SV=2	NFLYAWCGK	1157.53	1157.53	-0.0023	28.79
173	DHX9_MOUSE	ATP-dependent RNA helicase A OS=Mus musculus GN=Dhx9 PE=1 SV=2	LAAQSCALSLVR	1287.69	1287.7	-0.0024	29.87
173	DHX9_MOUSE	ATP-dependent RNA helicase A OS=Mus musculus GN=Dhx9 PE=1 SV=2	AAECNIVVTQPR	1356.68	1356.68	-0.0024	48.72
173	DHX9_MOUSE	ATP-dependent RNA helicase A OS=Mus musculus GN=Dhx9 PE=1 SV=2	AAECNIVVTQPR	1356.68	1356.68	-0.0023	52.72
173	DHX9_MOUSE	ATP-dependent RNA helicase A OS=Mus musculus GN=Dhx9 PE=1 SV=2	VRPGFCFHLCSR	1534.72	1534.73	-0.0036	37.6
173	DHX9_MOUSE	ATP-dependent RNA helicase A OS=Mus musculus GN=Dhx9 PE=1 SV=2	VRPGFCFHLCSR	1534.73	1534.73	-0.0034	23.49
173	DHX9_MOUSE	ATP-dependent RNA helicase A OS=Mus musculus GN=Dhx9 PE=1 SV=2	VRPGFCFHLCSR	1534.73	1534.73	-0.0027	53.14
174	GSTP1_MOUSE	ATP-dependent RNA helicase A OS=Mus musculus GN=Dhx9 PE=1 SV=2	VRPGFCFHLCSR	1534.73	1534.73	-0.0026	35.36
174	GSTP1_MOUSE	Glutathione S-transferase P 1 OS=Mus musculus GN=Gstp1 PE=1 SV=2	PTCLYGQLPK	1175.6	1175.6	-0.0023	42.1
174	GSTP1_MOUSE	Glutathione S-transferase P 1 OS=Mus musculus GN=Gstp1 PE=1 SV=2	EEVVTIDTWMQGLLKPTCLYGQLPK	2918.49	2918.49	-0.0047	82.92
174	GSTP1_MOUSE	Glutathione S-transferase P 1 OS=Mus musculus GN=Gstp1 PE=1 SV=2	EEVVTIDTWMQGLLKPTCLYGQLPK	2918.49	2918.49	-0.004	76.78
175	ARP10_MOUSE	Glutathione S-transferase P 1 OS=Mus musculus GN=Gstp1 PE=1 SV=2	EEVVTIDTWMQGLLKPTCLYGQLPK	2934.48	2934.49	-0.0023	53.03
175	ARP10_MOUSE	Actin-related protein 10 OS=Mus musculus GN=Actr10 PE=1 SV=2	SVATLILDSLLQCPIDTR	2014.07	2014.08	-0.0026	58.1
175	ARP10_MOUSE	Actin-related protein 10 OS=Mus musculus GN=Actr10 PE=1 SV=2	SVATLILDSLLQCPIDTR	2014.07	2014.08	-0.0024	60.89
175	ARP10_MOUSE	Actin-related protein 10 OS=Mus musculus GN=Actr10 PE=1 SV=2	SVATLILDSLLQCPIDTR	2014.08	2014.08	-0.0015	33.13
175	ARP10_MOUSE	Actin-related protein 10 OS=Mus musculus GN=Actr10 PE=1 SV=2	SVATLILDSLLQCPIDTR	2014.08	2014.08	-0.0013	56.1
175	ARP10_MOUSE	Actin-related protein 10 OS=Mus musculus GN=Actr10 PE=1 SV=2	ESLVLPIYEGIPILNCWGALPLGGK	2708.46	2708.46	-0.003	42.13
176	ARF5_MOUSE	Actin-related protein 10 OS=Mus musculus GN=Actr10 PE=1 SV=2	ESLVLPIYEGIPILNCWGALPLGGK	2708.46	2708.46	-0.003	39.15
176	ARF5_MOUSE	ADP-ribosylation factor 5 OS=Mus musculus GN=Arf5 PE=1 SV=2	NICFTVWDVGGQDK	1637.75	1637.75	-0.0029	83.14
177	PGRC2_MOUSE	ADP-ribosylation factor 5 OS=Mus musculus GN=Arf5 PE=1 SV=2	NICFTVWDVGGQDK	1637.75	1637.75	-0.0021	87.55
177	PGRC2_MOUSE	Membrane-associated progesterone receptor component 2 OS=Mus musculus GN=Pgrmc2 PE=1 SV=2	GLATFCLDK	1023.5	1023.51	-0.0018	29.97
177	PGRC2_MOUSE	Membrane-associated progesterone receptor component 2 OS=Mus musculus GN=Pgrmc2 PE=1 SV=2	GLATFCLDK	1023.51	1023.51	-0.0007	23.6
177	PGRC2_MOUSE	Membrane-associated progesterone receptor component 2 OS=Mus musculus GN=Pgrmc2 PE=1 SV=2	GLCSGPGAGEESPAATLPR	1825.86	1825.86	-0.0035	101.36
178	ACTN4_MOUSE	Membrane-associated progesterone receptor component 2 OS=Mus musculus GN=Pgrmc2 PE=1 SV=2	GLCSGPGAGEESPAATLPR	1825.86	1825.86	-0.0024	96.93
178	ACTN4_MOUSE	Alpha-actinin-4 OS=Mus musculus GN=Actn4 PE=1 SV=1	EGLLLWCQR	1173.59	1173.6	-0.002	32.39
178	ACTN4_MOUSE	Alpha-actinin-4 OS=Mus musculus GN=Actn4 PE=1 SV=1	EGLLLWCQR	1173.6	1173.6	-0.0014	32.49
178	ACTN4_MOUSE	Alpha-actinin-4 OS=Mus musculus GN=Actn4 PE=1 SV=1	EGLLLWCQR	1173.6	1173.6	-0.0006	28.29
178	ACTN4_MOUSE	Alpha-actinin-4 OS=Mus musculus GN=Actn4 PE=1 SV=1	TFTAWCNSHLR	1391.64	1391.64	-0.0027	21.29
178	ACTN4_MOUSE	Alpha-actinin-4 OS=Mus musculus GN=Actn4 PE=1 SV=1	TFTAWCNSHLR	1391.64	1391.64	-0.0027	45.57
178	ACTN4_MOUSE	Alpha-actinin-4 OS=Mus musculus GN=Actn4 PE=1 SV=1	TFTAWCNSHLR	1391.64	1391.64	-0.0023	21.21
178	ACTN4_MOUSE	Alpha-actinin-4 OS=Mus musculus GN=Actn4 PE=1 SV=1	TFTAWCNSHLR	1391.64	1391.64	-0.0019	37.3
178	ACTN4_MOUSE	Alpha-actinin-4 OS=Mus musculus GN=Actn4 PE=1 SV=1	CQLEINFNTLQTK	1607.8	1607.8	-0.0012	68.86
179	MAOX_MOUSE	Alpha-actinin-4 OS=Mus musculus GN=Actn4 PE=1 SV=1	ACLISLGYDVENDR	1623.75	1623.76	-0.0026	66.76
179	MAOX_MOUSE	NADP-dependent malic enzyme OS=Mus musculus GN=Me1 PE=1 SV=2	QQLNIHGLLPPCIISQELQVLR	2568.42	2568.42	-0.0035	57.28
179	MAOX_MOUSE	NADP-dependent malic enzyme OS=Mus musculus GN=Me1 PE=1 SV=2	QQLNIHGLLPPCIISQELQVLR	2568.42	2568.42	-0.0024	47.74
179	MAOX_MOUSE	NADP-dependent malic enzyme OS=Mus musculus GN=Me1 PE=1 SV=2	TLFPGQGNNSYVFPGVALGVVACGLR	2692.37	2692.38	-0.0079	93.38
180	PSA4_MOUSE	NADP-dependent malic enzyme OS=Mus musculus GN=Me1 PE=1 SV=2	TLFPGQGNNSYVFPGVALGVVACGLR	2692.38	2692.38	-0.0025	44.03
180	PSA4_MOUSE	Proteasome subunit alpha type-4 OS=Mus musculus GN=Psma4 PE=1 SV=1	YLLQYQEPIPCEQLVTALCDIK	2693.34	2693.34	-0.0052	55.12
180	PSA4_MOUSE	Proteasome subunit alpha type-4 OS=Mus musculus GN=Psma4 PE=1 SV=1	YLLQYQEPIPCEQLVTALCDIK	2693.34	2693.34	-0.0051	50.31
180	PSA4_MOUSE	Proteasome subunit alpha type-4 OS=Mus musculus GN=Psma4 PE=1 SV=1	YLLQYQEPIPCEQLVTALCDIK	2693.34	2693.34	-0.0033	54.01
180	PSA4_MOUSE	Proteasome subunit alpha type-4 OS=Mus musculus GN=Psma4 PE=1 SV=1	LYQVEYAMEAIGHAGTCLGILANDGVLLAAER	3417.7	3417.71	-0.0061	53.13
181	DCX_MOUSE	Proteasome subunit alpha type-4 OS=Mus musculus GN=Psma4 PE=1 SV=1	LYQVEYAMEAIGHAGTCLGILANDGVLLAAER	3417.71	3417.71	0.0064	54.02
181	DCX_MOUSE	Neuronal migration protein doublecortin OS=Mus musculus GN=Dcx PE=1 SV=1	YAQDDFSLDENECR	1760.69	1760.69	-0.003	98.32
182	BAF_MOUSE	Neuronal migration protein doublecortin OS=Mus musculus GN=Dcx PE=1 SV=1	YAQDDFSLDENECR	1760.69	1760.69	-0.0021	105.31
182	BAF_MOUSE	Barrier-to-autointegration factor OS=Mus musculus GN=Banf1 PE=1 SV=1	DCFGCLREWCDAFL	1847.74	1847.74	-0.0009	46.55
183	CY1_MOUSE	Barrier-to-autointegration factor OS=Mus musculus GN=Banf1 PE=1 SV=1	DCFGCLREWCDAFL	1847.74	1847.74	-0.0006	47.84
183	CY1_MOUSE	Cytochrome c1, heme protein, mitochondrial OS=Mus musculus GN=Cyc1 PE=1 SV=1	HLVGVCYTEEEAK	1533.71	1533.71	-0.0027	67.56
183	CY1_MOUSE	Cytochrome c1, heme protein, mitochondrial OS=Mus musculus GN=Cyc1 PE=1 SV=1	HGGEDYVFSLLTGYCEPPTGVSLR	2653.24	2653.25	-0.0097	61.05
183	CY1_MOUSE	Cytochrome c1, heme protein, mitochondrial OS=Mus musculus GN=Cyc1 PE=1 SV=1	HGGEDYVFSLLTGYCEPPTGVSLR	2653.24	2653.25	-0.0047	63.88
184	TCPZ_MOUSE	Cytochrome c1, heme protein, mitochondrial OS=Mus musculus GN=Cyc1 PE=1 SV=1	HGGEDYVFSLLTGYCEPPTGVSLR	2653.24	2653.25	-0.0043	53.49
184	TCPZ_MOUSE	T-complex protein 1 subunit zeta OS=Mus musculus GN=Cct6a PE=1 SV=3	NAIDDGCVVPGAGAVEVALAEALIK	2451.26	2451.27	-0.0054	57.5
184	TCPZ_MOUSE	T-complex protein 1 subunit zeta OS=Mus musculus GN=Cct6a PE=1 SV=3	NAIDDGCVVPGAGAVEVALAEALIK	2451.26	2451.27	-0.0042	68.56
184	TCPZ_MOUSE	T-complex protein 1 subunit zeta OS=Mus musculus GN=Cct6a PE=1 SV=3	NAIDDGCVVPGAGAVEVALAEALIK	2451.26	2451.27	-0.003	60.91
185	LONM_MOUSE	T-complex protein 1 subunit zeta OS=Mus musculus GN=Cct6a PE=1 SV=3	NAIDDGCVVPGAGAVEVALAEALIK	2451.27	2451.27	0.0003	59.54
185	LONM_MOUSE	Lon protease homolog, mitochondrial OS=Mus musculus GN=Lonp1 PE=1 SV=2	ILCFHGPPGVGK	1280.67	1280.67	-0.0017	20.8
185	LONM_MOUSE	Lon protease homolog, mitochondrial OS=Mus musculus GN=Lonp1 PE=1 SV=2	AGVTCIILPAENR	1412.74	1412.74	-0.0034	51.91
185	LONM_MOUSE	Lon protease homolog, mitochondrial OS=Mus musculus GN=Lonp1 PE=1 SV=2	VLFICTANVIDTIPEPLR	2070.12	2070.12	-0.0025	84.61
186	MYH10_MOUSE	Lon protease homolog, mitochondrial OS=Mus musculus GN=Lonp1 PE=1 SV=2	VLFICTANVIDTIPEPLR	2070.12	2070.12	-0.002	84.98
186	MYH10_MOUSE	Myosin-10 OS=Mus musculus GN=Myh10 PE=1 SV=2	ADFCIIHYAGK	1293.61	1293.62	-0.0028	21.12
186	MYH10_MOUSE	Myosin-10 OS=Mus musculus GN=Myh10 PE=1 SV=2	ADFCIIHYAGK	1293.62	1293.62	-0.0021	32.62
186	MYH10_MOUSE	Myosin-10 OS=Mus musculus GN=Myh10 PE=1 SV=2	ADFCIIHYAGK	1293.62	1293.62	-0.0016	28.52
186	MYH10_MOUSE	Myosin-10 OS=Mus musculus GN=Myh10 PE=1 SV=2	EDQSILCTGESGAGK	1550.68	1550.69	-0.0032	50.94
186	MYH10_MOUSE	Myosin-10 OS=Mus musculus GN=Myh10 PE=1 SV=2	EDQSILCTGESGAGK	1550.69	1550.69	-0.0022	65.95
186	MYH10_MOUSE	Myosin-10 OS=Mus musculus GN=Myh10 PE=1 SV=2	PANPPGVLALLDEECWFPK	2152.06	2152.07	-0.0066	31.35
187	NONO_MOUSE	Myosin-10 OS=Mus musculus GN=Myh10 PE=1 SV=2	PANPPGVLALLDEECWFPK	2152.06	2152.07	-0.0025	69.17
187	NONO_MOUSE	Non-POU domain-containing octamer-binding protein OS=Mus musculus GN=Nono PE=1 SV=3	FACHSASLTVR	1247.61	1247.61	-0.0028	52.36
187	NONO_MOUSE	Non-POU domain-containing octamer-binding protein OS=Mus musculus GN=Nono PE=1 SV=3	FACHSASLTVR	1247.61	1247.61	-0.0025	48.37
187	NONO_MOUSE	Non-POU domain-containing octamer-binding protein OS=Mus musculus GN=Nono PE=1 SV=3	FACHSASLTVR	1247.61	1247.61	-0.0024	32.42
187	NONO_MOUSE	Non-POU domain-containing octamer-binding protein OS=Mus musculus GN=Nono PE=1 SV=3	CSEGSFLLTTFPR	1513.72	1513.72	-0.0026	68.65
188	PRDX4_MOUSE	Non-POU domain-containing octamer-binding protein OS=Mus musculus GN=Nono PE=1 SV=3	CSEGSFLLTTFPR	1513.72	1513.72	-0.002	67.16
188	PRDX4_MOUSE	Peroxiredoxin-4 OS=Mus musculus GN=Prdx4 PE=1 SV=1	ENECHFYAGGQVYPGEASR	2169.91	2169.92	-0.0047	39.03
188	PRDX4_MOUSE	Peroxiredoxin-4 OS=Mus musculus GN=Prdx4 PE=1 SV=1	ENECHFYAGGQVYPGEASR	2169.91	2169.92	-0.0027	57.27
188	PRDX4_MOUSE	Peroxiredoxin-4 OS=Mus musculus GN=Prdx4 PE=1 SV=1	HGEVCPAGWKPGSETIIPDPAGK	2402.16	2402.17	-0.0061	39.97
188	PRDX4_MOUSE	Peroxiredoxin-4 OS=Mus musculus GN=Prdx4 PE=1 SV=1	SINTEVVACSVDSQFTHLAWINTPR	2844.38	2844.39	-0.0031	66.05
189	PUR6_MOUSE	Peroxiredoxin-4 OS=Mus musculus GN=Prdx4 PE=1 SV=1	SINTEVVACSVDSQFTHLAWINTPR	2844.38	2844.39	-0.0027	57.31
189	PUR6_MOUSE	Multifunctional protein ADE2 OS=Mus musculus GN=Paics PE=1 SV=4	ITSCIFQLLQEAGIK	1719.92	1719.92	-0.003	43.06
189	PUR6_MOUSE	Multifunctional protein ADE2 OS=Mus musculus GN=Paics PE=1 SV=4	ITSCIFQLLQEAGIK	1719.92	1719.92	-0.0024	85.04
190	XPP1_MOUSE	Multifunctional protein ADE2 OS=Mus musculus GN=Paics PE=1 SV=4	ITSCIFQLLQEAGIK	1719.92	1719.92	-0.0019	98.61
190	XPP1_MOUSE	Xaa-Pro aminopeptidase 1 OS=Mus musculus GN=Xpnpep1 PE=2 SV=1	ALCADLSPR	1001.49	1001.5	-0.002	56.89
190	XPP1_MOUSE	Xaa-Pro aminopeptidase 1 OS=Mus musculus GN=Xpnpep1 PE=2 SV=1	DAVALCELFNWLEQEVPK	2160.05	2160.06	-0.005	67.43
190	XPP1_MOUSE	Xaa-Pro aminopeptidase 1 OS=Mus musculus GN=Xpnpep1 PE=2 SV=1	DAVALCELFNWLEQEVPK	2160.05	2160.06	-0.0042	43.46
191	VATG1_MOUSE	Xaa-Pro aminopeptidase 1 OS=Mus musculus GN=Xpnpep1 PE=2 SV=1	DAVALCELFNWLEQEVPK	2160.05	2160.06	-0.004	69.57
191	VATG1_MOUSE	V-type proton ATPase subunit G 1 OS=Mus musculus GN=Atp6v1g1 PE=2 SV=3	EAAALGSHGSCSSEVEK	1717.76	1717.76	-0.0021	66.61
191	VATG1_MOUSE	V-type proton ATPase subunit G 1 OS=Mus musculus GN=Atp6v1g1 PE=2 SV=3	DEVLDNLLAFVCDIRPEIHENYR	2829.37	2829.38	-0.0043	57.34
191	VATG1_MOUSE	V-type proton ATPase subunit G 1 OS=Mus musculus GN=Atp6v1g1 PE=2 SV=3	DEVLDNLLAFVCDIRPEIHENYR	2829.37	2829.38	-0.0039	95.88
192	BZW1_MOUSE	V-type proton ATPase subunit G 1 OS=Mus musculus GN=Atp6v1g1 PE=2 SV=3	DEVLDNLLAFVCDIRPEIHENYR	2829.37	2829.38	-0.0028	20.37
192	BZW1_MOUSE	Basic leucine zipper and W2 domain-containing protein 1 OS=Mus musculus GN=Bzw1 PE=1 SV=1	FDPTQFQDCIIQGLTETGTDLEAVAK	2896.37	2896.38	-0.013	73.05
192	BZW1_MOUSE	Basic leucine zipper and W2 domain-containing protein 1 OS=Mus musculus GN=Bzw1 PE=1 SV=1	FDPTQFQDCIIQGLTETGTDLEAVAK	2896.38	2896.38	-0.0032	70.13
193	PPCE_MOUSE	Basic leucine zipper and W2 domain-containing protein 1 OS=Mus musculus GN=Bzw1 PE=1 SV=1	FDPTQFQDCIIQGLTETGTDLEAVAK	2896.38	2896.38	-0.0028	77.13
193	PPCE_MOUSE	Prolyl endopeptidase OS=Mus musculus GN=Prep PE=2 SV=1	YVLLSIWEGCDPVNR	1819.89	1819.89	-0.0014	48.11
193	PPCE_MOUSE	Prolyl endopeptidase OS=Mus musculus GN=Prep PE=2 SV=1	LWYCDLQQEPNGITGILK	2147.07	2147.07	-0.0034	53
193	PPCE_MOUSE	Prolyl endopeptidase OS=Mus musculus GN=Prep PE=2 SV=1	DSEIFYQFTSFLSPGVIYHCDLTK	2866.35	2866.35	-0.0004	66.2
194	RS3A_MOUSE	Prolyl endopeptidase OS=Mus musculus GN=Prep PE=2 SV=1	DSEIFYQFTSFLSPGVIYHCDLTK	2866.35	2866.35	0.0014	71.15
194	RS3A_MOUSE	40S ribosomal protein S3a OS=Mus musculus GN=Rps3a PE=1 SV=3	LFCVGFTK	970.493	970.495	-0.0017	42.3
194	RS3A_MOUSE	40S ribosomal protein S3a OS=Mus musculus GN=Rps3a PE=1 SV=3	LFCVGFTK	970.493	970.495	-0.0014	42.3
194	RS3A_MOUSE	40S ribosomal protein S3a OS=Mus musculus GN=Rps3a PE=1 SV=3	LFCVGFTK	970.493	970.495	-0.0014	31.9
194	RS3A_MOUSE	40S ribosomal protein S3a OS=Mus musculus GN=Rps3a PE=1 SV=3	LFCVGFTK	970.494	970.495	-0.0011	33.88
194	RS3A_MOUSE	40S ribosomal protein S3a OS=Mus musculus GN=Rps3a PE=1 SV=3	NCLTNFHGMDLTR	1577.7	1577.71	-0.0029	22.11
194	RS3A_MOUSE	40S ribosomal protein S3a OS=Mus musculus GN=Rps3a PE=1 SV=3	ACQSIYPLHDVFVR	1703.84	1703.85	-0.0038	64.54
194	RS3A_MOUSE	40S ribosomal protein S3a OS=Mus musculus GN=Rps3a PE=1 SV=3	ACQSIYPLHDVFVR	1703.84	1703.85	-0.0038	32.88
194	RS3A_MOUSE	40S ribosomal protein S3a OS=Mus musculus GN=Rps3a PE=1 SV=3	ACQSIYPLHDVFVR	1703.84	1703.85	-0.0019	46.29
195	1433Z_MOUSE	40S ribosomal protein S3a OS=Mus musculus GN=Rps3a PE=1 SV=3	ACQSIYPLHDVFVR	1703.84	1703.85	-0.0016	36.18
195	1433Z_MOUSE	14-3-3 protein zeta/delta OS=Mus musculus GN=Ywhaz PE=1 SV=1	DICNDVLSLLEK	1417.71	1417.71	-0.0011	61.44
195	1433Z_MOUSE	14-3-3 protein zeta/delta OS=Mus musculus GN=Ywhaz PE=1 SV=1	DICNDVLSLLEK	1417.71	1417.71	-0.0011	57.36
195	1433Z_MOUSE	14-3-3 protein zeta/delta OS=Mus musculus GN=Ywhaz PE=1 SV=1	IETELRDICNDVLSLLEK	2159.11	2159.11	-0.0028	58.08
196	SYSC_MOUSE	14-3-3 protein zeta/delta OS=Mus musculus GN=Ywhaz PE=1 SV=1	IETELRDICNDVLSLLEK	2159.11	2159.11	-0.0015	75.32
196	SYSC_MOUSE	Serine--tRNA ligase, cytoplasmic OS=Mus musculus GN=Sars PE=2 SV=3	YAGLSTCFR	1073.49	1073.5	-0.0027	42.99
196	SYSC_MOUSE	Serine--tRNA ligase, cytoplasmic OS=Mus musculus GN=Sars PE=2 SV=3	YAGLSTCFR	1073.49	1073.5	-0.0022	45.16
196	SYSC_MOUSE	Serine--tRNA ligase, cytoplasmic OS=Mus musculus GN=Sars PE=2 SV=3	TICAILENYQAEK	1551.76	1551.76	-0.0024	56.96
196	SYSC_MOUSE	Serine--tRNA ligase, cytoplasmic OS=Mus musculus GN=Sars PE=2 SV=3	TICAILENYQAEK	1551.76	1551.76	-0.0022	55.65
197	COPB2_MOUSE	Serine--tRNA ligase, cytoplasmic OS=Mus musculus GN=Sars PE=2 SV=3	ELVSCSNCTDYQAR	1701.71	1701.71	-0.0022	61.84
197	COPB2_MOUSE	Coatomer subunit beta~ OS=Mus musculus GN=Copb2 PE=2 SV=2	VWCVASLR	989.51	989.512	-0.0021	46.09
197	COPB2_MOUSE	Coatomer subunit beta~ OS=Mus musculus GN=Copb2 PE=2 SV=2	VWCVASLR	989.51	989.512	-0.0019	24.67
197	COPB2_MOUSE	Coatomer subunit beta~ OS=Mus musculus GN=Copb2 PE=2 SV=2	VWCVASLR	989.51	989.512	-0.0017	46.06
197	COPB2_MOUSE	Coatomer subunit beta~ OS=Mus musculus GN=Copb2 PE=2 SV=2	TFEVCDLPVR	1234.6	1234.6	-0.0028	42.63
197	COPB2_MOUSE	Coatomer subunit beta~ OS=Mus musculus GN=Copb2 PE=2 SV=2	TFEVCDLPVR	1234.6	1234.6	-0.0019	44.09
197	COPB2_MOUSE	Coatomer subunit beta~ OS=Mus musculus GN=Copb2 PE=2 SV=2	GVNCIDYYSGGDKPYLISGADDR	2534.13	2534.14	-0.0058	50.64
198	ARM10_MOUSE	Coatomer subunit beta~ OS=Mus musculus GN=Copb2 PE=2 SV=2	GVNCIDYYSGGDKPYLISGADDR	2534.13	2534.14	-0.0049	44.05
198	ARM10_MOUSE	Armadillo repeat-containing protein 10 OS=Mus musculus GN=Armc10 PE=1 SV=1	ALTLFQNINNCLK	1547.81	1547.81	-0.0018	59.61
198	ARM10_MOUSE	Armadillo repeat-containing protein 10 OS=Mus musculus GN=Armc10 PE=1 SV=1	GSLFFLLYGEECAQK	1760.84	1760.84	-0.0018	75.91
198	ARM10_MOUSE	Armadillo repeat-containing protein 10 OS=Mus musculus GN=Armc10 PE=1 SV=1	IYVPQVCEDVFADPLNSAVQLAGLR	2773.41	2773.41	-0.003	52.18
199	HNRPD_MOUSE	Armadillo repeat-containing protein 10 OS=Mus musculus GN=Armc10 PE=1 SV=1	IYVPQVCEDVFADPLNSAVQLAGLR	2773.41	2773.41	-0.0025	53.66
199	HNRPD_MOUSE	Heterogeneous nuclear ribonucleoprotein D0 OS=Mus musculus GN=Hnrnpd PE=1 SV=2	GFCFITFK	1018.49	1018.49	-0.0022	32.76
199	HNRPD_MOUSE	Heterogeneous nuclear ribonucleoprotein D0 OS=Mus musculus GN=Hnrnpd PE=1 SV=2	GFCFITFK	1018.49	1018.49	-0.0011	28.87
199	HNRPD_MOUSE	Heterogeneous nuclear ribonucleoprotein D0 OS=Mus musculus GN=Hnrnpd PE=1 SV=2	FGEVVDCTLK	1166.56	1166.56	-0.0027	53.4
199	HNRPD_MOUSE	Heterogeneous nuclear ribonucleoprotein D0 OS=Mus musculus GN=Hnrnpd PE=1 SV=2	FGEVVDCTLK	1166.56	1166.56	-0.0022	52.2
199	HNRPD_MOUSE	Heterogeneous nuclear ribonucleoprotein D0 OS=Mus musculus GN=Hnrnpd PE=1 SV=2	GFCFITFKEEEPVK	1729.84	1729.84	-0.0017	56.23
200	SCRN1_MOUSE	Heterogeneous nuclear ribonucleoprotein D0 OS=Mus musculus GN=Hnrnpd PE=1 SV=2	GFCFITFKEEEPVK	1729.84	1729.84	-0.0007	38.78
200	SCRN1_MOUSE	Secernin-1 OS=Mus musculus GN=Scrn1 PE=1 SV=1	CICNHLSLATK	1315.64	1315.64	-0.0021	50.29
200	SCRN1_MOUSE	Secernin-1 OS=Mus musculus GN=Scrn1 PE=1 SV=1	CICNHLSLATK	1315.64	1315.64	-0.002	44.42
200	SCRN1_MOUSE	Secernin-1 OS=Mus musculus GN=Scrn1 PE=1 SV=1	CICNHLSLATK	1315.64	1315.64	-0.0017	36.41
200	SCRN1_MOUSE	Secernin-1 OS=Mus musculus GN=Scrn1 PE=1 SV=1	CICNHLSLATK	1315.64	1315.64	-0.0016	39.34
200	SCRN1_MOUSE	Secernin-1 OS=Mus musculus GN=Scrn1 PE=1 SV=1	SSPCIHYFTGTPDPSR	1820.81	1820.82	-0.0025	52.45
201	PSME2_MOUSE	Secernin-1 OS=Mus musculus GN=Scrn1 PE=1 SV=1	SSPCIHYFTGTPDPSR	1820.81	1820.82	-0.0016	52.92
201	PSME2_MOUSE	Proteasome activator complex subunit 2 OS=Mus musculus GN=Psme2 PE=2 SV=4	QNLFQEADDFLCTFLPR	2112.99	2112.99	-0.0048	70.17
201	PSME2_MOUSE	Proteasome activator complex subunit 2 OS=Mus musculus GN=Psme2 PE=2 SV=4	QNLFQEADDFLCTFLPR	2112.99	2112.99	-0.0043	92.22
201	PSME2_MOUSE	Proteasome activator complex subunit 2 OS=Mus musculus GN=Psme2 PE=2 SV=4	QNLFQEADDFLCTFLPR	2112.99	2112.99	-0.0042	32.09
202	HNRPQ_MOUSE	Proteasome activator complex subunit 2 OS=Mus musculus GN=Psme2 PE=2 SV=4	QNLFQEADDFLCTFLPR	2112.99	2112.99	-0.0042	36.01
202	HNRPQ_MOUSE	Heterogeneous nuclear ribonucleoprotein Q OS=Mus musculus GN=Syncrip PE=1 SV=2	GYAFVTFCTK	1192.56	1192.56	-0.0021	53.74
202	HNRPQ_MOUSE	Heterogeneous nuclear ribonucleoprotein Q OS=Mus musculus GN=Syncrip PE=1 SV=2	GYAFVTFCTK	1192.56	1192.56	-0.002	55.23
202	HNRPQ_MOUSE	Heterogeneous nuclear ribonucleoprotein Q OS=Mus musculus GN=Syncrip PE=1 SV=2	HIGVCISVANNR	1338.68	1338.68	-0.0018	55.42
202	HNRPQ_MOUSE	Heterogeneous nuclear ribonucleoprotein Q OS=Mus musculus GN=Syncrip PE=1 SV=2	GFCFLEYEDHK	1443.61	1443.61	-0.0038	21.94
202	HNRPQ_MOUSE	Heterogeneous nuclear ribonucleoprotein Q OS=Mus musculus GN=Syncrip PE=1 SV=2	GFCFLEYEDHK	1443.61	1443.61	-0.0032	54.24
203	ACTN1_MOUSE	Heterogeneous nuclear ribonucleoprotein Q OS=Mus musculus GN=Syncrip PE=1 SV=2	GFCFLEYEDHK	1443.61	1443.61	-0.0025	25.68
203	ACTN1_MOUSE	Alpha-actinin-1 OS=Mus musculus GN=Actn1 PE=1 SV=1	EGLLLWCQR	1173.59	1173.6	-0.002	32.39
203	ACTN1_MOUSE	Alpha-actinin-1 OS=Mus musculus GN=Actn1 PE=1 SV=1	EGLLLWCQR	1173.6	1173.6	-0.0014	32.49
203	ACTN1_MOUSE	Alpha-actinin-1 OS=Mus musculus GN=Actn1 PE=1 SV=1	EGLLLWCQR	1173.6	1173.6	-0.0006	28.29
203	ACTN1_MOUSE	Alpha-actinin-1 OS=Mus musculus GN=Actn1 PE=1 SV=1	DGLGFCALIHR	1257.63	1257.63	-0.002	42.21
203	ACTN1_MOUSE	Alpha-actinin-1 OS=Mus musculus GN=Actn1 PE=1 SV=1	DGLGFCALIHR	1257.63	1257.63	-0.0019	27.47
203	ACTN1_MOUSE	Alpha-actinin-1 OS=Mus musculus GN=Actn1 PE=1 SV=1	TFTAWCNSHLR	1391.64	1391.64	-0.0027	21.29
203	ACTN1_MOUSE	Alpha-actinin-1 OS=Mus musculus GN=Actn1 PE=1 SV=1	TFTAWCNSHLR	1391.64	1391.64	-0.0027	45.57
203	ACTN1_MOUSE	Alpha-actinin-1 OS=Mus musculus GN=Actn1 PE=1 SV=1	TFTAWCNSHLR	1391.64	1391.64	-0.0023	21.21
203	ACTN1_MOUSE	Alpha-actinin-1 OS=Mus musculus GN=Actn1 PE=1 SV=1	TFTAWCNSHLR	1391.64	1391.64	-0.0019	37.3
204	UBA6_MOUSE	Alpha-actinin-1 OS=Mus musculus GN=Actn1 PE=1 SV=1	CQLEINFNTLQTK	1607.8	1607.8	-0.0012	68.86
204	UBA6_MOUSE	Ubiquitin-like modifier-activating enzyme 6 OS=Mus musculus GN=Uba6 PE=1 SV=1	NCFLNLAIPIIVFTETSEVR	2335.22	2335.22	-0.0039	24.33
204	UBA6_MOUSE	Ubiquitin-like modifier-activating enzyme 6 OS=Mus musculus GN=Uba6 PE=1 SV=1	NCFLNLAIPIIVFTETSEVR	2335.22	2335.22	-0.0024	42.42
204	UBA6_MOUSE	Ubiquitin-like modifier-activating enzyme 6 OS=Mus musculus GN=Uba6 PE=1 SV=1	NCFLNLAIPIIVFTETSEVR	2335.22	2335.22	-0.0018	57.11
205	TBCD_MOUSE	Ubiquitin-like modifier-activating enzyme 6 OS=Mus musculus GN=Uba6 PE=1 SV=1	FSPLCQWLYLEAADTVESLGNPGHEEFLPR	3474.65	3474.66	-0.006	101.76
205	TBCD_MOUSE	Tubulin-specific chaperone D OS=Mus musculus GN=Tbcd PE=2 SV=1	CGFSSALGALPGFLLR	1664.87	1664.87	-0.0033	70.08
205	TBCD_MOUSE	Tubulin-specific chaperone D OS=Mus musculus GN=Tbcd PE=2 SV=1	CGFSSALGALPGFLLR	1664.87	1664.87	-0.0028	68.54
206	TM9S2_MOUSE	Tubulin-specific chaperone D OS=Mus musculus GN=Tbcd PE=2 SV=1	EDCLPYANTVLQCLDGCR	2182.94	2182.94	-0.004	75.63
206	TM9S2_MOUSE	Transmembrane 9 superfamily member 2 OS=Mus musculus GN=Tm9sf2 PE=2 SV=1	DACVISSEFHER	1448.63	1448.64	-0.002	51.32
206	TM9S2_MOUSE	Transmembrane 9 superfamily member 2 OS=Mus musculus GN=Tm9sf2 PE=2 SV=1	FCNPGFPIGCYITDK	1787.8	1787.8	-0.0021	64.6
206	TM9S2_MOUSE	Transmembrane 9 superfamily member 2 OS=Mus musculus GN=Tm9sf2 PE=2 SV=1	FCNPGFPIGCYITDK	1787.8	1787.8	-0.0006	62.96
206	TM9S2_MOUSE	Transmembrane 9 superfamily member 2 OS=Mus musculus GN=Tm9sf2 PE=2 SV=1	LDSVESVLPYEYTAFDFCQASEGK	2754.23	2754.24	-0.0075	28.79
207	COPE_MOUSE	Transmembrane 9 superfamily member 2 OS=Mus musculus GN=Tm9sf2 PE=2 SV=1	LDSVESVLPYEYTAFDFCQASEGK	2754.23	2754.24	-0.0048	31.07
207	COPE_MOUSE	Coatomer subunit epsilon OS=Mus musculus GN=Cope PE=2 SV=3	NAFYIGSYQQCINEAQR	2060.93	2060.94	-0.0035	80.32
207	COPE_MOUSE	Coatomer subunit epsilon OS=Mus musculus GN=Cope PE=2 SV=3	NAFYIGSYQQCINEAQR	2060.94	2060.94	-0.0017	83.83
207	COPE_MOUSE	Coatomer subunit epsilon OS=Mus musculus GN=Cope PE=2 SV=3	TLHQGDGLECMAMTIQILLK	2271.14	2271.14	-0.0034	43.9
208	GSDMA_MOUSE	Coatomer subunit epsilon OS=Mus musculus GN=Cope PE=2 SV=3	LQEAYYIFQELADKCSPTLLLLNGQAACHSAQGR	3864.89	3864.89	-0.0075	21.52
208	GSDMA_MOUSE	Gasdermin-A OS=Mus musculus GN=Gsdma PE=2 SV=1	GCVLAYR	837.415	837.417	-0.0014	27.5
208	GSDMA_MOUSE	Gasdermin-A OS=Mus musculus GN=Gsdma PE=2 SV=1	GCVLAYR	837.415	837.417	-0.0012	30.33
208	GSDMA_MOUSE	Gasdermin-A OS=Mus musculus GN=Gsdma PE=2 SV=1	FHPFCLVLR	1187.63	1187.63	-0.0021	25.3
208	GSDMA_MOUSE	Gasdermin-A OS=Mus musculus GN=Gsdma PE=2 SV=1	FHPFCLVLR	1187.63	1187.63	-0.0015	22.77
208	GSDMA_MOUSE	Gasdermin-A OS=Mus musculus GN=Gsdma PE=2 SV=1	FHPFCLVLR	1187.63	1187.63	-0.0012	33.74
208	GSDMA_MOUSE	Gasdermin-A OS=Mus musculus GN=Gsdma PE=2 SV=1	AEGCFSLPFFAPLGLQGSVNHK	2375.17	2375.17	-0.0031	36.5
208	GSDMA_MOUSE	Gasdermin-A OS=Mus musculus GN=Gsdma PE=2 SV=1	AEGCFSLPFFAPLGLQGSVNHK	2375.17	2375.17	-0.0027	21.57
208	GSDMA_MOUSE	Gasdermin-A OS=Mus musculus GN=Gsdma PE=2 SV=1	AEGCFSLPFFAPLGLQGSVNHK	2375.17	2375.17	-0.0022	42.3
208	GSDMA_MOUSE	Gasdermin-A OS=Mus musculus GN=Gsdma PE=2 SV=1	AEGCFSLPFFAPLGLQGSVNHK	2375.17	2375.17	-0.0018	37.37
209	ARP3_MOUSE	Gasdermin-A OS=Mus musculus GN=Gsdma PE=2 SV=1	SGPQYTWDPDTLPHLCALYAGLSLLQLLSK	3356.7	3356.71	-0.0072	79.8
209	ARP3_MOUSE	Actin-related protein 3 OS=Mus musculus GN=Actr3 PE=1 SV=3	YSYVCPDLVK	1242.59	1242.6	-0.0023	35.02
209	ARP3_MOUSE	Actin-related protein 3 OS=Mus musculus GN=Actr3 PE=1 SV=3	LPACVVDCGTGYTK	1539.7	1539.71	-0.0021	73.76
209	ARP3_MOUSE	Actin-related protein 3 OS=Mus musculus GN=Actr3 PE=1 SV=3	LGYAGNTEPQFIIPSCIAIK	2191.13	2191.13	-0.0035	57.97
210	MTPN_MOUSE	Actin-related protein 3 OS=Mus musculus GN=Actr3 PE=1 SV=3	TLTGTVIDSGDGVTHVIPVAEGYVIGSCIK	3057.57	3057.57	-0.0036	58
210	MTPN_MOUSE	Myotrophin OS=Mus musculus GN=Mtpn PE=1 SV=2	HHITPLLSAVYEGHVSCVK	2146.1	2146.1	-0.0026	39.01
210	MTPN_MOUSE	Myotrophin OS=Mus musculus GN=Mtpn PE=1 SV=2	KPLHYAADCGQLEILEFLLLK	2470.33	2470.33	-0.0035	83.77
210	MTPN_MOUSE	Myotrophin OS=Mus musculus GN=Mtpn PE=1 SV=2	KPLHYAADCGQLEILEFLLLK	2470.33	2470.33	-0.0028	30.14
211	1433B_MOUSE	Myotrophin OS=Mus musculus GN=Mtpn PE=1 SV=2	KPLHYAADCGQLEILEFLLLK	2470.33	2470.33	-0.0021	74.48
211	1433B_MOUSE	14-3-3 protein beta/alpha OS=Mus musculus GN=Ywhab PE=1 SV=3	IEAELQDICNDVLELLDK	2129.05	2129.06	-0.0026	82.4
211	1433B_MOUSE	14-3-3 protein beta/alpha OS=Mus musculus GN=Ywhab PE=1 SV=3	IEAELQDICNDVLELLDK	2129.05	2129.06	-0.0021	61.95
212	LA_MOUSE	14-3-3 protein beta/alpha OS=Mus musculus GN=Ywhab PE=1 SV=3	EKIEAELQDICNDVLELLDK	2386.19	2386.19	-0.0021	59.25
212	LA_MOUSE	Lupus La protein homolog OS=Mus musculus GN=Ssb PE=1 SV=1	ICHQIEYYFGDFNLPR	2070.96	2070.96	-0.0055	70.43
212	LA_MOUSE	Lupus La protein homolog OS=Mus musculus GN=Ssb PE=1 SV=1	ICHQIEYYFGDFNLPR	2070.96	2070.96	-0.0038	38.87
212	LA_MOUSE	Lupus La protein homolog OS=Mus musculus GN=Ssb PE=1 SV=1	ICHQIEYYFGDFNLPR	2070.96	2070.96	-0.0037	44.03
213	RL18A_MOUSE	Lupus La protein homolog OS=Mus musculus GN=Ssb PE=1 SV=1	ICHQIEYYFGDFNLPR	2070.96	2070.96	-0.0028	61.83
213	RL18A_MOUSE	60S ribosomal protein L18a OS=Mus musculus GN=Rpl18a PE=1 SV=1	DLTTAGAVTQCYR	1454.68	1454.68	-0.0025	58.56
213	RL18A_MOUSE	60S ribosomal protein L18a OS=Mus musculus GN=Rpl18a PE=1 SV=1	DLTTAGAVTQCYR	1454.68	1454.68	-0.0024	54.16
213	RL18A_MOUSE	60S ribosomal protein L18a OS=Mus musculus GN=Rpl18a PE=1 SV=1	SSGEIVYCGQVFEK	1601.74	1601.74	-0.0041	43.58
214	TBC15_MOUSE	60S ribosomal protein L18a OS=Mus musculus GN=Rpl18a PE=1 SV=1	SSGEIVYCGQVFEK	1601.74	1601.74	-0.0018	73.74
214	TBC15_MOUSE	TBC1 domain family member 15 OS=Mus musculus GN=Tbc1d15 PE=1 SV=1	TLLVNCQNK	1088.56	1088.56	-0.0019	22
214	TBC15_MOUSE	TBC1 domain family member 15 OS=Mus musculus GN=Tbc1d15 PE=1 SV=1	YVVLCESPQDSR	1451.67	1451.67	-0.0032	49.32
214	TBC15_MOUSE	TBC1 domain family member 15 OS=Mus musculus GN=Tbc1d15 PE=1 SV=1	YVVLCESPQDSR	1451.68	1451.67	0.0136	43.38
214	TBC15_MOUSE	TBC1 domain family member 15 OS=Mus musculus GN=Tbc1d15 PE=1 SV=1	DDSPTQTLASPNACR	1631.72	1631.72	-0.0028	69.82
215	CX6B1_MOUSE	TBC1 domain family member 15 OS=Mus musculus GN=Tbc1d15 PE=1 SV=1	DDSPTQTLASPNACR	1631.72	1631.72	-0.0019	62.57
215	CX6B1_MOUSE	Cytochrome c oxidase subunit 6B1 OS=Mus musculus GN=Cox6b1 PE=1 SV=2	NCWQNYLDFHR	1551.66	1551.67	-0.0036	34.96
215	CX6B1_MOUSE	Cytochrome c oxidase subunit 6B1 OS=Mus musculus GN=Cox6b1 PE=1 SV=2	NCWQNYLDFHR	1551.66	1551.67	-0.0031	38.51
215	CX6B1_MOUSE	Cytochrome c oxidase subunit 6B1 OS=Mus musculus GN=Cox6b1 PE=1 SV=2	NCWQNYLDFHR	1551.66	1551.67	-0.0031	55.31
215	CX6B1_MOUSE	Cytochrome c oxidase subunit 6B1 OS=Mus musculus GN=Cox6b1 PE=1 SV=2	NCWQNYLDFHR	1551.67	1551.67	-0.0013	44.15
216	PDIA1_MOUSE	Cytochrome c oxidase subunit 6B1 OS=Mus musculus GN=Cox6b1 PE=1 SV=2	SLCPVSWVSAWDDR	1676.76	1676.76	-0.0026	60.84
216	PDIA1_MOUSE	Protein disulfide-isomerase OS=Mus musculus GN=P4hb PE=1 SV=2	EECPAVR	859.385	859.386	-0.0009	20.09
216	PDIA1_MOUSE	Protein disulfide-isomerase OS=Mus musculus GN=P4hb PE=1 SV=2	ITEFCHR	961.442	961.444	-0.0019	37.34
217	AP1B1_MOUSE	Protein disulfide-isomerase OS=Mus musculus GN=P4hb PE=1 SV=2	ITEFCHR	961.442	961.444	-0.0016	35.12
217	AP1B1_MOUSE	AP-1 complex subunit beta-1 OS=Mus musculus GN=Ap1b1 PE=2 SV=2	DCEDPNPLIR	1227.55	1227.56	-0.0029	29.57
217	AP1B1_MOUSE	AP-1 complex subunit beta-1 OS=Mus musculus GN=Ap1b1 PE=2 SV=2	DCEDPNPLIR	1227.55	1227.56	-0.0028	36.78
217	AP1B1_MOUSE	AP-1 complex subunit beta-1 OS=Mus musculus GN=Ap1b1 PE=2 SV=2	CAIKVEQSAER	1289.64	1289.64	-0.0026	24.04
217	AP1B1_MOUSE	AP-1 complex subunit beta-1 OS=Mus musculus GN=Ap1b1 PE=2 SV=2	CAIKVEQSAER	1289.64	1289.64	-0.0015	22.23
217	AP1B1_MOUSE	AP-1 complex subunit beta-1 OS=Mus musculus GN=Ap1b1 PE=2 SV=2	CAIKVEQSAER	1289.64	1289.64	-0.0015	39.28
217	AP1B1_MOUSE	AP-1 complex subunit beta-1 OS=Mus musculus GN=Ap1b1 PE=2 SV=2	DCPLNTEAASNK	1318.58	1318.58	-0.0025	50.4
217	AP1B1_MOUSE	AP-1 complex subunit beta-1 OS=Mus musculus GN=Ap1b1 PE=2 SV=2	CVSTLLDLIQTK	1389.75	1389.75	-0.0023	52.58
217	AP1B1_MOUSE	AP-1 complex subunit beta-1 OS=Mus musculus GN=Ap1b1 PE=2 SV=2	CVSTLLDLIQTK	1389.75	1389.75	-0.0016	53.37
217	AP1B1_MOUSE	AP-1 complex subunit beta-1 OS=Mus musculus GN=Ap1b1 PE=2 SV=2	EAQSICERVTPR	1444.71	1444.71	-0.0013	23.2
218	DDX1_MOUSE	AP-1 complex subunit beta-1 OS=Mus musculus GN=Ap1b1 PE=2 SV=2	EAQSICERVTPR	1444.71	1444.71	-0.0006	20.34
218	DDX1_MOUSE	ATP-dependent RNA helicase DDX1 OS=Mus musculus GN=Ddx1 PE=1 SV=1	FLICTDVAAR	1164.59	1164.6	-0.0024	51.49
218	DDX1_MOUSE	ATP-dependent RNA helicase DDX1 OS=Mus musculus GN=Ddx1 PE=1 SV=1	GHQFSCVCLHGDR	1571.67	1571.67	-0.0035	38.54
218	DDX1_MOUSE	ATP-dependent RNA helicase DDX1 OS=Mus musculus GN=Ddx1 PE=1 SV=1	GHQFSCVCLHGDR	1571.67	1571.67	-0.0031	40.01
218	DDX1_MOUSE	ATP-dependent RNA helicase DDX1 OS=Mus musculus GN=Ddx1 PE=1 SV=1	GHQFSCVCLHGDR	1571.67	1571.67	-0.0029	42.19
220	RS2_MOUSE	ATP-dependent RNA helicase DDX1 OS=Mus musculus GN=Ddx1 PE=1 SV=1	GHQFSCVCLHGDR	1571.67	1571.67	-0.0027	65.66
220	RS2_MOUSE	40S ribosomal protein S2 OS=Mus musculus GN=Rps2 PE=2 SV=3	CGSVLVR	789.416	789.417	-0.0006	44.66
220	RS2_MOUSE	40S ribosomal protein S2 OS=Mus musculus GN=Rps2 PE=2 SV=3	CGSVLVR	789.416	789.417	-0.0006	22.73
220	RS2_MOUSE	40S ribosomal protein S2 OS=Mus musculus GN=Rps2 PE=2 SV=3	IGKPHTVPCK	1135.62	1135.62	-0.0014	21.87
220	RS2_MOUSE	40S ribosomal protein S2 OS=Mus musculus GN=Rps2 PE=2 SV=3	GCTATLGNFAK	1138.54	1138.54	-0.0018	47.69
220	RS2_MOUSE	40S ribosomal protein S2 OS=Mus musculus GN=Rps2 PE=2 SV=3	GCTATLGNFAK	1138.54	1138.54	-0.0018	51.21
220	RS2_MOUSE	40S ribosomal protein S2 OS=Mus musculus GN=Rps2 PE=2 SV=3	PHTVPCKVTGR	1250.65	1250.66	-0.0021	25.2
220	RS2_MOUSE	40S ribosomal protein S2 OS=Mus musculus GN=Rps2 PE=2 SV=3	IGKPHTVPCKVTGR	1548.85	1548.86	-0.0036	49.84
220	RS2_MOUSE	40S ribosomal protein S2 OS=Mus musculus GN=Rps2 PE=2 SV=3	IGKPHTVPCKVTGR	1548.85	1548.86	-0.0026	27.45
220	RS2_MOUSE	40S ribosomal protein S2 OS=Mus musculus GN=Rps2 PE=2 SV=3	IGKPHTVPCKVTGR	1548.85	1548.86	-0.0023	32.57
221	RAP1A_MOUSE	40S ribosomal protein S2 OS=Mus musculus GN=Rps2 PE=2 SV=3	IGKPHTVPCKVTGR	1548.85	1548.86	-0.0017	20.71
221	RAP1A_MOUSE	Ras-related protein Rap-1A OS=Mus musculus GN=Rap1a PE=2 SV=1	CDLEDER	935.364	935.365	-0.0018	57.54
221	RAP1A_MOUSE	Ras-related protein Rap-1A OS=Mus musculus GN=Rap1a PE=2 SV=1	CDLEDER	935.364	935.365	-0.0014	51.28
221	RAP1A_MOUSE	Ras-related protein Rap-1A OS=Mus musculus GN=Rap1a PE=2 SV=1	QWCNCAFLESSAK	1599.68	1599.68	-0.0027	43.03
222	ECM29_MOUSE	Ras-related protein Rap-1A OS=Mus musculus GN=Rap1a PE=2 SV=1	QWCNCAFLESSAK	1599.68	1599.68	-0.0024	54.8
222	ECM29_MOUSE	Proteasome-associated protein ECM29 homolog OS=Mus musculus GN=Ecm29 PE=1 SV=3	TIAVLLPCLLDK	1354.79	1354.79	-0.0027	33.48
222	ECM29_MOUSE	Proteasome-associated protein ECM29 homolog OS=Mus musculus GN=Ecm29 PE=1 SV=3	TIAVLLPCLLDK	1354.79	1354.79	-0.0017	36.96
222	ECM29_MOUSE	Proteasome-associated protein ECM29 homolog OS=Mus musculus GN=Ecm29 PE=1 SV=3	DIALVQQLFEALCKEEPETR	2388.2	2388.2	0.0002	41.67
222	ECM29_MOUSE	Proteasome-associated protein ECM29 homolog OS=Mus musculus GN=Ecm29 PE=1 SV=3	SATETIGSFLDSTSPLLAIAACTALGEIGR	3021.53	3021.53	-0.0057	47.84
223	PP1A_MOUSE	Proteasome-associated protein ECM29 homolog OS=Mus musculus GN=Ecm29 PE=1 SV=3	SATETIGSFLDSTSPLLAIAACTALGEIGR	3021.53	3021.53	-0.0019	71.9
223	PP1A_MOUSE	Serine/threonine-protein phosphatase PP1-alpha catalytic subunit OS=Mus musculus GN=Ppp1ca PE=1 SV=1	HDLDLICR	1040.5	1040.51	-0.0025	34.67
223	PP1A_MOUSE	Serine/threonine-protein phosphatase PP1-alpha catalytic subunit OS=Mus musculus GN=Ppp1ca PE=1 SV=1	HDLDLICR	1040.51	1040.51	-0.0016	38.93
223	PP1A_MOUSE	Serine/threonine-protein phosphatase PP1-alpha catalytic subunit OS=Mus musculus GN=Ppp1ca PE=1 SV=1	QSLETICLLLAYK	1550.83	1550.84	-0.003	60.33
223	PP1A_MOUSE	Serine/threonine-protein phosphatase PP1-alpha catalytic subunit OS=Mus musculus GN=Ppp1ca PE=1 SV=1	QSLETICLLLAYK	1550.84	1550.84	-0.0014	80.52
223	PP1A_MOUSE	Serine/threonine-protein phosphatase PP1-alpha catalytic subunit OS=Mus musculus GN=Ppp1ca PE=1 SV=1	ICGDIHGQYYDLLR	1721.82	1721.82	-0.004	20.92
224	ABRAL_MOUSE	Serine/threonine-protein phosphatase PP1-alpha catalytic subunit OS=Mus musculus GN=Ppp1ca PE=1 SV=1	TFTDCFNCLPIAAIVDEK	2112.98	2112.99	-0.0033	25
224	ABRAL_MOUSE	Costars family protein ABRACL OS=Mus musculus GN=Abracl PE=3 SV=1	CANLFEALVGTLK	1434.75	1434.75	-0.0026	44
224	ABRAL_MOUSE	Costars family protein ABRACL OS=Mus musculus GN=Abracl PE=3 SV=1	CANLFEALVGTLK	1434.75	1434.75	-0.0014	84.45
225	MTCH2_MOUSE	Costars family protein ABRACL OS=Mus musculus GN=Abracl PE=3 SV=1	CANLFEALVGTLK	1434.75	1434.75	-0.001	78.21
225	MTCH2_MOUSE	Mitochondrial carrier homolog 2 OS=Mus musculus GN=Mtch2 PE=1 SV=1	TYCYDLR	989.426	989.428	-0.0017	21.64
225	MTCH2_MOUSE	Mitochondrial carrier homolog 2 OS=Mus musculus GN=Mtch2 PE=1 SV=1	LCSGVLGTVVHGK	1325.71	1325.71	-0.0029	30.26
225	MTCH2_MOUSE	Mitochondrial carrier homolog 2 OS=Mus musculus GN=Mtch2 PE=1 SV=1	LCSGVLGTVVHGK	1325.71	1325.71	-0.0025	37.18
225	MTCH2_MOUSE	Mitochondrial carrier homolog 2 OS=Mus musculus GN=Mtch2 PE=1 SV=1	LCSGVLGTVVHGK	1325.71	1325.71	-0.0025	41.33
225	MTCH2_MOUSE	Mitochondrial carrier homolog 2 OS=Mus musculus GN=Mtch2 PE=1 SV=1	LCSGVLGTVVHGK	1325.71	1325.71	-0.0023	53.58
225	MTCH2_MOUSE	Mitochondrial carrier homolog 2 OS=Mus musculus GN=Mtch2 PE=1 SV=1	QVCQLPGLFCYAQHIASIDGR	2432.17	2432.17	-0.0021	28.73
225	MTCH2_MOUSE	Mitochondrial carrier homolog 2 OS=Mus musculus GN=Mtch2 PE=1 SV=1	QVCQLPGLFCYAQHIASIDGR	2432.17	2432.17	-0.0019	29.45
226	CTNB1_MOUSE	Mitochondrial carrier homolog 2 OS=Mus musculus GN=Mtch2 PE=1 SV=1	QVCQLPGLFCYAQHIASIDGR	2432.17	2432.17	0.0015	40.41
226	CTNB1_MOUSE	Catenin beta-1 OS=Mus musculus GN=Ctnnb1 PE=1 SV=1	LVQNCLWTLR	1301.69	1301.69	-0.0026	56.52
226	CTNB1_MOUSE	Catenin beta-1 OS=Mus musculus GN=Ctnnb1 PE=1 SV=1	LVQNCLWTLR	1301.69	1301.69	-0.0022	50.7
226	CTNB1_MOUSE	Catenin beta-1 OS=Mus musculus GN=Ctnnb1 PE=1 SV=1	VAAGVLCELAQDK	1372.7	1372.7	-0.0026	50.94
226	CTNB1_MOUSE	Catenin beta-1 OS=Mus musculus GN=Ctnnb1 PE=1 SV=1	EDITEPAICALR	1386.68	1386.68	-0.0017	27.36
227	VDAC1_MOUSE	Catenin beta-1 OS=Mus musculus GN=Ctnnb1 PE=1 SV=1	NLALCPANHAPLR	1445.75	1445.76	-0.0033	53.51
227	VDAC1_MOUSE	Voltage-dependent anion-selective channel protein 1 OS=Mus musculus GN=Vdac1 PE=1 SV=3	YQVDPDACFSAK	1399.61	1399.61	-0.0029	47.98
227	VDAC1_MOUSE	Voltage-dependent anion-selective channel protein 1 OS=Mus musculus GN=Vdac1 PE=1 SV=3	YQVDPDACFSAK	1399.61	1399.61	-0.0019	56.23
228	ACON_MOUSE	Voltage-dependent anion-selective channel protein 1 OS=Mus musculus GN=Vdac1 PE=1 SV=3	EHINLGCDVDFDIAGPSIR	2127	2127.01	-0.0032	89.9
228	ACON_MOUSE	Aconitate hydratase, mitochondrial OS=Mus musculus GN=Aco2 PE=1 SV=1	DVGGIVLANACGPCIGQWDR	2157.01	2157.01	-0.0039	68.94
228	ACON_MOUSE	Aconitate hydratase, mitochondrial OS=Mus musculus GN=Aco2 PE=1 SV=1	DVGGIVLANACGPCIGQWDR	2157.01	2157.01	-0.0026	89.75
[truncated: 1,357 more rows]
