# Supplementary material for: Quantitative H2S-mediated protein sulfhydration reveals metabolic reprogramming during the integrated stress response
Source: eLife. 2015 Nov 23;4:e10067. doi: 10.7554/eLife.10067 (PMC4733038; doi:10.7554/eLife.10067)
Supplement: Figure 3—source data 1 — DOI: http://dx.doi.org/10.7554/eLife.10067.023 [file elife-10067-fig3-data1.xlsx]

## Sheet: full sulfhydrome from ATF4 MIN6
Summary of cysteine containing peptides identified in LC-MS/MS analysis.
Protein	Gene ID	Accessions	MH+ [Da]	Sequence	H/L	Xcorr
ATP-dependent RNA helicase DDX3X isoform X1	Ddx3x	569008633	1253.69	GCHLLVATPGR	1.16094	3.70888
ATP-dependent RNA helicase DDX3X isoform X1	Ddx3x	569008633	1975.07	VRPCVVYGGAEIGQQIR	1.7685	4.47241
14-3-3 protein theta	Ywhaq	6756039	1207.49	YDDMATCMK	1.7246	3.01987
14-3-3 protein theta	Ywhaq	6756039	1341.62	YLAEVACGDDR	2.0741	3.87835
14-3-3 protein theta	Ywhaq	6756039	1469.72	YLAEVACGDDRK	1.97306	3.68954
14-3-3 protein zeta/delta-like, partial	LOC102641764	568902620	1177.48	YDDMAACMK	2.2791	3.1644
26S protease regulatory subunit 10B	Psmc6	27754103	1441.71	NVCTEAGMFAIR	2.11763	3.28893
26S protease regulatory subunit 4	Psmc1	6679501	1378.73	AICTEAGLMALR	1.94131	3.14657
26S protease regulatory subunit 6A	Psmc3	228008337	1362.73	AVCVEAGMIALR	1.61337	3.40658
26S protease regulatory subunit 7	Psmc2	33859604	1414.69	SVCTEAGMFAIR	1.88225	2.93787
26S protease regulatory subunit 8	Psmc5	7110703	1495.72	AVAHHTDCTFIR	2.34704	2.87878
26S protease regulatory subunit 8	Psmc5	7110703	1400.68	GVCTEAGMYALR	2.00875	2.76438
26S protease regulatory subunit 8	Psmc5	7110703	1503.74	NIDINDVTPNCR	2.09082	3.69807
26S proteasome non-ATPase regulatory subunit 1	Psmd1	74315975	2472.24	TPEQCPSVVSLLSESYNPHVR	1.81674	6.01952
26S proteasome non-ATPase regulatory subunit 13	Psmd13	6755210	1024.56	FLGCVDIK	1.91496	2.71393
26S proteasome non-ATPase regulatory subunit 13	Psmd13	6755210	1236.64	LELWCTDVK	1.6335	2.25853
26S proteasome non-ATPase regulatory subunit 2	Psmd2	19882201	895.491	CALGVFR	1.51807	2.49981
26S proteasome non-ATPase regulatory subunit 2	Psmd2	19882201	1546.85	SGALLACGIVNSGVR	2.86427	4.46995
26S proteasome non-ATPase regulatory subunit 4 isoform 2	Psmd4	6679505	1783.93	LQAQQDAVNIVCHSK	1.91289	2.42021
2-amino-3-ketobutyrate coenzyme A ligase, mitochondrial isoform b	Gcat	240120119	1263.66	FICGTQSIHK	1.66341	2.27319
3'(2'),5'-bisphosphate nucleotidase 1	Bpnt1	39652626	1437.77	LVQMSICSSLAR	1.59047	3.59684
3'(2'),5'-bisphosphate nucleotidase 1	Bpnt1	39652626	2431.18	SHSNQLVTDCISAMNPDTVLR	1.80563	4.65527
40S ribosomal protein S11	Rps11	21426889	1218.6	CPFTGNVSIR	1.21435	3.06399
40S ribosomal protein S11	Rps11	21426889	1415.66	NMSVHLSPCFR	1.78584	2.5149
40S ribosomal protein S12-like	Rps12l2	149258592	1134.61	LGEWVGLCK	2.28529	2.81805
40S ribosomal protein S15a	Rps15a	24762230	1216.7	LNKCGVISPR	1.78115	3.32319
40S ribosomal protein S17-like	Gm5215	568993807	1331.74	VCEEIAIIPSK	-	3.8277
40S ribosomal protein S20	Rps20	13385652	919.512	VCADLIR	1.94463	2.48821
40S ribosomal protein S21 isoform X1	Rps21	568920401	1083.57	TYGICGAIR	2.03456	2.52029
40S ribosomal protein S27-like	Rps27l	13385958	1042.51	LTEGCSFR	1.98934	2.20767
40S ribosomal protein S28 isoform X1	Rps28	569001008	1289.6	TGSQGQCTQVR	0.954138	2.73797
40S ribosomal protein S29	Rps29	6677803	986.465	YGLNMCR	2.31469	2.27566
40S ribosomal protein S2-like isoform X2	Gm6139	568892508	863.486	CGSVLVR	1.60218	2.40385
40S ribosomal protein S2-like isoform X2	Gm6139	568892508	1207.58	GCTATLGNFAK	1.22585	2.99537
40S ribosomal protein S3	Rps3	6755372	911.487	ACYGVLR	1.72256	2.4057
40S ribosomal protein S3	Rps3	6755372	1356.7	GLCAIAQAESLR	3.17001	3.76399
40S ribosomal protein S3	Rps3	6755372	1067.59	RACYGVLR	2.59128	2.04031
40S ribosomal protein S3a	Rps3a1	254553321	1772.89	ACQSIYPLHDVFVR	1.64039	3.8248
40S ribosomal protein S3a	Rps3a1	254553321	1044.56	LFCVGFTK	1.66627	2.26433
40S ribosomal protein S4, X isoform	Rps4x	6677805	1346.8	ECLPLIIFLR	2.04593	2.87205
40S ribosomal protein S4, X isoform	Rps4x	6677805	1855.89	FDTGNLCMVTGGANLGR	2.16845	5.23155
40S ribosomal protein S4, X isoform	Rps4x	6677805	1615.98	LRECLPLIIFLR	2.03347	3.73798
40S ribosomal protein S5 isoform X1	Rps5	568945150	1045.56	AQCPIVER	1.74517	2.4233
40S ribosomal protein S5 isoform X1	Rps5	568945150	1569.83	VNQAIWLLCTGAR	1.82619	5.13879
40S ribosomal protein S6	Rps6	6677809	1408.74	LNISFPATGCQK	1.717	2.73476
40S ribosomal protein S8	Rps8	6677813	1933.87	LDVGNFSWGSECCTR	-	3.84247
40S ribosomal protein S8	Rps8	6677813	1523.8	NCIVLIDSTPYR	2.55311	3.86609
40S ribosomal protein SA-like	LOC102642689	568903782	1374.68	YVDIAIPCNNK	2.07259	3.51844
4-aminobutyrate aminotransferase, mitochondrial isoform 2 precursor	Abat	283483966	1688.77	GTFCSFDTPDEAIR	2.17666	3.63446
4-trimethylaminobutyraldehyde dehydrogenase precursor	Aldh9a1	115334671	1132.62	CQVLLEAAR	-	2.36406
4-trimethylaminobutyraldehyde dehydrogenase precursor	Aldh9a1	115334671	1250.61	VIATFACSGEK	2.54153	2.1061
5'-AMP-activated protein kinase catalytic subunit alpha-1 isoform X1	Prkaa1	568990171	1808.93	LFQQILSGVDYCHR	1.76297	3.5479
5'-AMP-activated protein kinase catalytic subunit alpha-1 isoform X1	Prkaa1	568990171	1735.83	SQSRPNDIMAEVCR	4.01775	3.5727
5'-AMP-activated protein kinase catalytic subunit alpha-1 isoform X1	Prkaa1	568990171	1838.88	TSCGSPNYAAPEVISGR	1.92699	4.79135
60 kDa heat shock protein, mitochondrial isoform X1	Hspd1	568905803	1757.97	AAVEEGIVLGGGCALLR	3.0342	4.6429
60S acidic ribosomal protein P0	Rplp0	6671569	2253.17	AGAIAPCEVTVPAQNTGLGPEK	2.08048	4.16749
60S acidic ribosomal protein P0	Rplp0	6671569	1339.68	CFIVGADNVGSK	1.84954	2.41409
60S ribosomal protein L10	Rpl10	16418339	1053.49	MLSCAGADR	1.9139	2.23646
60S ribosomal protein L11-like	Gm3552	568990135	1028.58	IAVHCTVR	1.86934	2.31403
60S ribosomal protein L12	Rpl12	160333553	1486.73	CTGGEVGATSALAPK	1.44583	4.86439
60S ribosomal protein L12	Rpl12	160333553	1748.87	EILGTAQSVGCNVDGR	1.87993	3.87216
60S ribosomal protein L14	Rpl14	13385472	1061.55	ALVDGPCTR	2.07048	2.15528
60S ribosomal protein L14	Rpl14	13385472	1341.7	CMQLTDFILK	1.33764	3.28423
60S ribosomal protein L15-like	Gm4581	149267527	1140.58	VRCWQYR	1.46283	2.78682
60S ribosomal protein L18a	Rpl18a	58037465	1523.72	DLTTAGAVTQCYR	1.84559	4.30915
60S ribosomal protein L23-like	LOC100044627	377837128	1119.54	ECADLWPR	2.8975	2.04001
60S ribosomal protein L23-like	LOC100044627	377837128	2038.07	ISLGLPVGAVINCADNTGAK	2.01889	4.46686
60S ribosomal protein L24	Rpl24	18250296	1262.62	VELCSFSGYK	1.82933	2.04838
60S ribosomal protein L27a-like	Gm8213	568893303	1490.7	NQSFCPTVNLDK	2.00351	2.94445
60S ribosomal protein L28-like	Gm10051	568892520	1041.55	NCSSFLIK	1.90846	2.07365
60S ribosomal protein L30-like	Gm6570	568890009	1426.83	LVILANNCPALR	1.80742	3.68018
60S ribosomal protein L30-like	Gm6570	568890009	1825.95	VCTLAIIDPGDSDIIR	1.83024	4.66779
60S ribosomal protein L36	Rpl36	160333837	1300.61	EVCGFAPYER	1.81268	2.3759
60S ribosomal protein L3-like, partial	Gm12816	568904602	1310.69	VACIGAWHPAR	2.05348	3.49042
60S ribosomal protein L4	Rpl4	30794450	1384.64	FCIWTESAFR	1.69049	2.69617
60S ribosomal protein L4	Rpl4	30794450	1673.83	GPCIIYNEDNGIIK	2.20332	3.92413
60S ribosomal protein L4	Rpl4	30794450	1834.96	RGPCIIYNEDNGIIK	2.06265	3.83999
60S ribosomal protein L4	Rpl4	30794450	1257.56	SGQGAFGNMCR	2.52527	2.82326
60S ribosomal protein L4	Rpl4	30794450	2010.09	YAICSALAASALPALVMSK	1.60823	5.78784
60S ribosomal protein L5 isoform X1	Rpl5	568935106	1295.69	DIICQIAYAR	2.57265	2.86488
60S ribosomal protein L7a	Rpl7a	7305443	1773.84	TCTTVAFTQVNSEDK	2.49276	4.11762
60S ribosomal protein L9-like	LOC101056029	568900450	1308.67	TGVACSVSQAQK	2.22351	3.19739
6-phosphofructokinase type C isoform X5	Pfkp	568981406	1892.95	LPLMECVQMTQDVQK	2.00351	4.55903
6-phosphofructokinase, muscle type isoform X3	Pfkm	568991693	1710.84	IFANTPDSGCVLGMR	1.56216	3.83832
6-phosphogluconate dehydrogenase, decarboxylating isoform X1	Pgd	568930427	1410.62	SAVDNCQDSWR	2.32888	3.20358
6-phosphogluconolactonase isoform 1	Pgls	13384778	1653.82	TGALCWFLDEAAAR	2.47561	3.75789
6-phosphogluconolactonase isoform 1	Pgls	13384778	1256.58	WTLGFCDER	2.21038	2.73644
acetyl-CoA acetyltransferase, mitochondrial precursor	Acat1	21450129	2002.08	QATLGAGLPISTPCTTVNK	1.46426	4.78773
aconitate hydratase, mitochondrial precursor	Aco2	18079339	1918.88	VGLIGSCTNSSYEDMGR	1.99609	4.68228
actin, cytoplasmic 1	Actb	6671509	845.388	CDVDIR	1.1321	2.44043
actin, cytoplasmic 1	Actb	6671509	2024.96	QEYDESGPSIVHRKCF	1.87767	2.61732
actin-related protein 3	Actr3	329664963	1411.66	DYEEIGPSICR	1.95238	2.62572
actin-related protein 3	Actr3	329664963	1316.67	YSYVCPDLVK	1.42056	2.32865
acyl-CoA dehydrogenase family member 9, mitochondrial	Acad9	100817933	1288.66	AYICAHPLDR	2.29895	2.12105
acyl-CoA-binding domain-containing protein 5 isoform X3	Acbd5	568914413	2971.33	SSEDEKPGDESSQQTGHTIVCAHQDR	1.69752	3.70446
acyl-protein thioesterase 2	Lypla2	7242156	1086.56	YICPHAPR	1.71394	2.54353
adenylyl cyclase-associated protein 1 isoform X1	Cap1	568928280	1725.87	ALLATASQCQQPAGNK	1.99204	4.78842
adenylyl cyclase-associated protein 1 isoform X1	Cap1	568928280	2250.99	LEAVSHTSDMHCGYGDSPSK	7.4667	4.61072
adenylyl cyclase-associated protein 1 isoform X1	Cap1	568928280	1308.66	NSLDCEIVSAK	2.27564	3.03822
ADP/ATP translocase 1	Slc25a4	148747424	1321.62	EFNGLGDCLTK	1.61088	2.90894
ADP/ATP translocase 1	Slc25a4	148747424	1731.79	GADIMYTGTLDCWR	3.52257	3.73481
ADP/ATP translocase 2	Slc25a5	22094075	934.512	GLGDCLVK	2.08632	2.72145
ADP/ATP translocase 2	Slc25a5	22094075	1761.81	GTDIMYTGTLDCWR	2.19219	4.33848
ADP-dependent glucokinase isoform X1	Adpgk	568962117	1780.86	VAGTQACATETIDTNR	2.13216	5.2508
ADP-ribosylarginine hydrolase	Adprh	6680658	893.479	AMCIGLR	2.08293	2.3013
ADP-ribosylation factor 4	Arf4	6680720	1711.82	NICFTVWDVGGQDK	2.10772	3.23504
ADP-ribosylation factor-like 3 isoform X1	Arl3	569007565	1428.8	LSCVPVLIFANK	1.71157	3.31216
ADP-ribosylation factor-like protein 6-interacting protein 1	Arl6ip1	45433590	1314.66	FHEICSNLVK	1.54549	3.18631
A-kinase anchor protein SPHKAP	Sphkap	170014712	1395.7	TQTLCTESVQR	2.11274	2.58288
alanine--tRNA ligase, cytoplasmic isoform X1	Aars	568956640	1790.92	ITCLCQVPQNAANR	-	3.92205
alpha-1,3/1,6-mannosyltransferase ALG2	Alg2	172072657	1603.8	ELSVQCAGDWLPR	1.33323	3.10734
alpha-actinin-1 isoform X5	Actn1	568978636	1242.64	EGLLLWCQR	1.75831	2.93298
alpha-actinin-1 isoform X5	Actn1	568978636	1634.8	ELPPDQAEYCIAR	1.90848	2.19204
alpha-actinin-1 isoform X5	Actn1	568978636	1460.68	TFTAWCNSHLR	1.28631	2.88173
alpha-enolase isoform X3	Eno1	568930542	1143.56	SCNCLLLK	-	2.08027
alpha-enolase isoform X3	Eno1	568930542	1706.89	VNQIGSVTESIQACK	2.12828	4.61888
alpha-soluble NSF attachment protein isoform X2	Napa	568944692	1490.72	ADPQEAINCLMR	2.53345	3.12962
alpha-soluble NSF attachment protein isoform X2	Napa	568944692	1326.65	IEEACEIYAR	2.72841	3.07797
aminoacyl tRNA synthase complex-interacting multifunctional protein 1	Aimp1	126012517	1767.86	GVLSQAMVMCASSPEK	49.6513	4.18007
aminopeptidase B isoform 1	Rnpep	227499103	1472.74	AFFPCFDTPAVK	2.49391	2.10768
annexin A4 isoform X1	Anxa4	568940372	1734.88	GAGTDEGCLIEILASR	2.06605	4.59592
annexin A4 isoform X1	Anxa4	568940372	1133.6	VLLVLCGGDD	1.75675	2.9999
annexin A5 isoform X1	Anxa5	568920727	1243.59	ALLLLCGGEDD	2.08091	2.90242
annexin A6 isoform b	Anxa6	158966670	1091.55	ALLALCGGED	2.35793	2.2174
annexin A6 isoform b	Anxa6	158966670	1100.57	FMTVLCTR	1.85038	2.1089
annexin A7	Anxa7	160707956	1145.55	CYQLEFGR	1.18186	2.03693
annexin A7	Anxa7	160707956	1245.61	LLVSMCQGNR	1.85966	2.37977
AP-2 complex subunit alpha-1 isoform X1	Ap2a1	568947209	1371.65	AADLLYAMCDR	1.83184	2.77191
AP-2 complex subunit alpha-1 isoform X1	Ap2a1	568947209	1539.76	ACNQLGQFLQHR	-	2.61831
AP-2 complex subunit alpha-1 isoform X1	Ap2a1	568947209	1673.87	LLQCYPPPEDAAVK	0.121455	2.92143
AP-2 complex subunit alpha-1 isoform X1	Ap2a1	568947209	1390.77	LVECLETVLNK	1.70007	3.60549
AP-2 complex subunit alpha-1 isoform X1	Ap2a1	568947209	1104.63	QSAALCLLR	-	2.30774
AP-2 complex subunit alpha-2	Ap2a2	163644277	1399.68	AVDLLYAMCDR	9.31048	2.78838
AP-2 complex subunit alpha-2	Ap2a2	163644277	1598.85	LLQCYPPPDPAVR	2.94335	2.65062
arginine--tRNA ligase, cytoplasmic	Rars	262118273	1341.69	AAQTSVAYGCIK	2.21571	3.44276
arpin	2610034B18Rik	47498088	1779.9	YYVLYIQPSCIHR	1.43622	2.43178
arsenite methyltransferase isoform X1	As3mt	569007591	1387.68	YYGCGLTVPER	1.21857	3.1005
asparagine--tRNA ligase, cytoplasmic isoform 2	Nars	219275596	995.508	DVCLYPR	4.53654	2.18146
asparagine--tRNA ligase, cytoplasmic isoform 2	Nars	219275596	1405.71	LEDLVCDVVDR	2.79641	3.12268
asparagine--tRNA ligase, cytoplasmic isoform 2	Nars	219275596	1756.9	LMTDTINEPILLCR	3.84095	4.53602
asparagine--tRNA ligase, cytoplasmic isoform 2	Nars	219275596	1709.82	YGTCPHGGYGLGLER	2.30651	4.08992
asparagine--tRNA ligase, cytoplasmic isoform 2	Nars	219275596	1564.82	YHIRDVCLYPR	3.95808	3.06578
aspartate aminotransferase, mitochondrial	Got2	6754036	1569.81	EYLPIGGLAEFCK	2.98843	3.34572
aspartate aminotransferase, mitochondrial	Got2	6754036	1719.8	TCGFDFSGALEDISK	2.04352	3.17939
aspartate aminotransferase, mitochondrial	Got2	6754036	1048.56	VGAFTVVCK	2.00184	2.49482
aspartate--tRNA ligase, cytoplasmic isoform 1 [	Dars	211065507	1436.7	LEYCEALAMLR	1.74948	3.18741
aspartyl aminopeptidase isoform X1	Dnpep	568907504	1458.73	SPSPFHVVAECR	1.27369	2.56778
ATP synthase subunit d, mitochondrial isoform X1	Atp5h	568975897	1413.69	SCAEFVSGSQLR	0.87539	5.18021
ATP synthase subunit gamma, mitochondrial isoform b	Atp5c1	163838648	1272.68	GLCGAIHSSVAK	1.67825	2.85764
ATPase WRNIP1	Wrnip1	254540120	1701.81	AGEEHYNCISALHK	1.91403	3.53598
ATP-binding cassette sub-family F member 1	Abcf1	39930335	1137.62	VVFAELACR	-	2.97388
ATP-binding cassette, sub-family C (CFTR/MRP), member 8 isoform X8	Abcc8	568947592	1195.6	LCAAFDAQAR	1.02198	3.10971
ATP-citrate synthase isoform 2	Acly	29293809	1728.79	AVQGMLDFDYVCSR	1.82811	4.02773
ATP-citrate synthase isoform 2	Acly	29293809	1945.11	GVTIIGPATVGGIKPGCFK	1.511	4.02793
ATP-citrate synthase isoform 2	Acly	29293809	1609.74	KPASFMTSICDER	1.74021	4.31707
ATP-citrate synthase isoform 2	Acly	29293809	914.425	NCGSFTR	1.45612	2.04442
ATP-citrate synthase isoform 2	Acly	29293809	1228.6	VDATADYICK	2.265	3.39161
ATP-citrate synthase isoform 2	Acly	29293809	1399.71	YICTTSAIQNR	1.83757	3.6492
ATP-dependent 6-phosphofructokinase, liver type	Pfkl	31560653	1662.88	VFANAPDSACVIGLR	2.19832	3.77153
ATP-dependent RNA helicase A isoform X1	Dhx9	568908101	1425.72	AAECNIVVTQPR	2.12514	3.60505
ATP-dependent RNA helicase A isoform X1	Dhx9	568908101	1361.77	LAAQSCALSLVR	36.9441	4.41677
ATP-dependent RNA helicase A isoform X1	Dhx9	568908101	1559.69	SSVNCPFSSQDMK	1.16157	2.6622
ATP-dependent RNA helicase A isoform X1	Dhx9	568908101	1671.8	VRPGFCFHLCSR	-	3.12079
ATP-dependent RNA helicase DDX1	Ddx1	19527256	1238.67	FLICTDVAAR	1.58031	2.68421
ATP-dependent RNA helicase DDX1	Ddx1	19527256	1718.8	GHQFSCVCLHGDR	-	3.4297
ATP-dependent RNA helicase DDX19A isoform X1	Ddx19a	568956088	1205.68	VLVTTNVCAR	1.76331	2.2649
ATP-dependent RNA helicase DDX39A isoform X1	Ddx39	568957494	1360.69	NCPHVVVGTPGR	1.24376	3.39885
basigin isoform 2 precursor	Bsg	116014342	1783.88	SGEYSCIFLPEPVGR	2.26944	4.1713
bifunctional 3'-phosphoadenosine 5'-phosphosulfate synthase 1 isoform b	Papss1	575402998	1479.78	GCTVWLTGLSGAGK	1.59839	4.31376
bifunctional glutamate/proline--tRNA ligase isoform X2	Eprs	568911610	1261.66	LNQWCNVVR	2.24462	2.12698
bifunctional glutamate/proline--tRNA ligase isoform X2	Eprs	568911610	1039.55	SCQFVAVR	3.45679	2.89429
bifunctional glutamate/proline--tRNA ligase isoform X2	Eprs	568911610	1090.58	VACQGEVVR	2.61839	3.11406
bifunctional purine biosynthesis protein PURH	Atic	227908823	1410.79	VVVCNLYPFVK	1.6732	3.03465
CAD protein isoform 2	Cad	575501556	2232.19	AQGLPVTCEVAPHHLFLNR	1.62765	3.8106
CAD protein isoform 2	Cad	575501556	1481.78	GHNQPCLLVGTGR	1.37875	3.38682
CAD protein isoform 2	Cad	575501556	1870.04	LCPPELPIPGSGLPPPR	1.74036	3.58516
CAD protein isoform 2	Cad	575501556	2188.07	NSVTGGTAAFEPSLDYCVVK	2.01	4.99523
CAD protein isoform 2	Cad	575501556	2451.22	VVEPELMGTPDGPCYPAPPVPR	19.9338	3.10941
calcium/calmodulin-dependent 3',5'-cyclic nucleotide phosphodiesterase 1A isoform PDE1A7	Pde1a	58036491	1676.84	EAELGLPFSPLCDR	1.50191	2.91901
calpain-2 catalytic subunit	Capn2	157951598	1506.87	LPCQLHQVIVAR	1.48218	2.69627
calpain-2 catalytic subunit	Capn2	157951598	2075.09	RPTEICADPQFIIGGATR	1.96585	4.218
calreticulin precursor	Calr	6680836	2929.46	CKDDEFTHLYTLIVRPDNTYEVK	1.34278	4.318
calreticulin precursor	Calr	6680836	2514.09	DMHGDSEYNIMFGPDICGPGTK	2.08165	5.00003
calreticulin precursor	Calr	6680836	1549.72	HEQNIDCGGGYVK	1.87858	4.4688
carboxypeptidase E precursor	Cpe	22203763	2168.02	AYSSFNPVMSDPNRPPCR	1.89312	2.31508
carboxypeptidase E precursor	Cpe	22203763	2380.07	SGTAHEYSSCPDDAIFQSLAR	1.42552	4.44559
casein kinase II subunit beta isoform X2	Csnk2b	568998843	1463.65	YQQGDFGYCPR	2.35569	3.37292
caspase-6	Casp6	157951736	1093.63	IFIIQACR	1.98157	3.04197
catenin alpha-2 isoform X3	Ctnna2	568940495	1099.56	IVAECNAVR	1.98022	2.31101
catenin beta-1 isoform X1	Ctnnb1	568963436	1446.77	VAAGVLCELAQDK	1.36345	3.15683
cathepsin B preproprotein	Ctsb	6681079	1661.82	EQWSNCPTIGQIR	2.43805	3.95163
cathepsin L1 isoform X1	Ctsl	568983003	1761.83	DNHCGLATAASYPVVN	2.28928	3.38677
cation-dependent mannose-6-phosphate receptor precursor	M6pr	14916479	1122.59	AVVMISCNR	2.00424	2.26561
cation-independent mannose-6-phosphate receptor precursor	Igf2r	133778978	1282.69	ATLITFLCDR	1.25013	2.76801
cation-independent mannose-6-phosphate receptor precursor	Igf2r	133778978	1578.81	TGATEHYLINVCK	2.44994	3.21519
cell cycle and apoptosis regulator protein 2 isoform X2	Ccar2	568987437	1318.66	VVAQNICQYR	1.59462	2.95732
cellular nucleic acid-binding protein isoform 3	Cnbp	157909784	1568.69	CGETGHVAINCSK	-	2.31732
cellular nucleic acid-binding protein isoform 3	Cnbp	157909784	1848.91	GFQFVSSSLPDICYR	1.8607	3.80422
cellular tumor antigen p53 isoform b	Trp53	187960040	1708.86	CSDGDGLAPPQHLIR	1.25474	3.08804
centromere protein V isoform X1	Cenpv	568976063	1287.63	CGVQSFYTPR	1.33102	3.08661
choline transporter-like protein 1 isoform B	Slc44a1	227499988	1761.84	LVSGYDSYGNICGQR	1.89951	3.37768
chromobox protein homolog 3-like	Gm6901	82950919	1545.67	LTWHSCPEDEAQ	2.12685	3.40281
chromodomain helicase DNA binding protein 5 isoform X7	Chd5	568931388	2071.96	HLCEPGADGAETFADGVPR	2.06784	3.47541
clathrin heavy chain 1	Cltc	51491845	1142.61	AHIAQLCEK	1.7528	2.64928
clathrin heavy chain 1	Cltc	51491845	1775.97	AHIAQLCEKAGLLQR	1.76707	2.72098
clathrin heavy chain 1	Cltc	51491845	1475.74	CNEPAVWSQLAK	2.64158	3.37046
clathrin heavy chain 1	Cltc	51491845	1403.69	DPHLACVAYER	1.92944	3.06552
clathrin heavy chain 1	Cltc	51491845	1586.78	HSSLAGCQIINYR	2.28457	3.92865
clathrin heavy chain 1	Cltc	51491845	1744.79	ICRESNCYDPER	-	2.6196
clathrin heavy chain 1	Cltc	51491845	1844.87	IHEGCEEPATHNALAK	1.30188	3.75932
clathrin heavy chain 1	Cltc	51491845	1559.79	RDPHLACVAYER	1.92392	3.26644
clathrin heavy chain 1	Cltc	51491845	1915.98	YESLELCRPVLQQGR	2.03482	2.94288
cleavage and polyadenylation specificity factor subunit 2 isoform X1	Cpsf2	568980060	1551.82	HLSLCHGLSDLAR	1.69335	2.87157
cleavage and polyadenylation specificity factor subunit 3 isoform X2	Cpsf3	568977902	1447.72	FCNTVHDIVNR	1.52491	2.56594
CLIP-associating protein 2 isoform X9	Clasp2	568964400	1416.75	IPRPSVSQGCSR	2.08486	3.0975
coatomer subunit alpha	Copa	226823359	1109.51	AWEVDTCR	2.66724	2.02824
coatomer subunit alpha	Copa	226823359	1730.83	GHYNNVSCAVFHPR	1.51309	4.16447
coatomer subunit alpha	Copa	226823359	2235.07	TTYQALPCLPSMYSYPNR	1.89998	4.14645
coatomer subunit beta'	Copb2	29789080	2290.05	DMGSCEIYPQTIQHNPNGR	2.06054	2.69026
coatomer subunit beta'	Copb2	29789080	1308.67	TFEVCDLPVR	1.72565	3.06889
coatomer subunit beta'	Copb2	29789080	1063.58	VWCVASLR	1.58814	2.56225
coatomer subunit delta	Arcn1	148747410	1631.86	NTLEWCLPVIDAK	2.54185	3.30952
coatomer subunit epsilon	Cope	10946972	2135.01	NAFYIGSYQQCINEAQR	2.25152	5.38269
coatomer subunit gamma-1 isoform 1	Copg1	8567338	1908.97	ALCQITDSTMLQAVER	1.98175	4.77889
coatomer subunit gamma-1 isoform 1	Copg1	8567338	1325.56	CVMDDDNEVR	1.84455	2.06529
cofilin-1	Cfl1	6680924	1863.87	HELQANCYEEVKDR	2.14368	5.80739
condensin complex subunit 1 isoform X2	Ncapd2	568942716	1769.87	DLAYCMSQLPLTER	1.77253	3.57381
constitutive coactivator of PPAR-gamma-like protein 2	Fam120c	126723307	1571.8	SDPLPAPSQCALSR	2.72883	2.33394
coronin-1C	Coro1c	31542413	1611.77	VTWDSSFCAVNPR	2.35957	3.04025
creatine kinase U-type, mitochondrial isoform X1	Ckmt1	568915233	1802.96	LGYILTCPSNLGTGLR	1.22376	3.90436
CTP synthase 1 isoform X1	Ctps	568929379	1358.76	GLGLSPDLVVCR	2.25957	3.1526
CUGBP Elav-like family member 2 isoform 7	Celf2	237757269	1672.79	VMFSPFGQIEECR	2.38725	3.31202
cullin-associated NEDD8-dissociated protein 1	Cand1	189409138	1368.74	TYIQCIAAISR	5.66895	3.11569
cystathionine beta-synthase isoform 2	Cbs	30089694	988.472	CTWQLGR	1.48082	2.55139
cystathionine beta-synthase isoform 2	Cbs	30089694	1225.67	CVVILPDSVR	2.16221	2.77006
cysteine--tRNA ligase, cytoplasmic isoform 2	Cars	357588502	1687.82	TAVHEALCDNIDTR	2.86128	3.27846
cysteine--tRNA ligase, cytoplasmic isoform 2	Cars	357588502	1782.87	VQPQWSPPAGTEPCR	2.81178	2.19497
cytochrome b-c1 complex subunit 1, mitochondrial precursor	Uqcrc1	46593021	1426.7	LCTSATESEVTR	2.02807	3.90843
cytochrome b-c1 complex subunit 1, mitochondrial precursor	Uqcrc1	46593021	2127.06	NALVSHLDGTTPVCEDIGR	1.8612	5.14633
cytochrome b-c1 complex subunit 1, mitochondrial precursor	Uqcrc1	46593021	1673.79	VYEEDAVPGLTPCR	2.28969	3.81184
cytochrome b-c1 complex subunit 6, mitochondrial	Uqcrh	21539599	1277.64	ERLELCDNR	2.80246	2.32781
cytochrome b-c1 complex subunit 6, mitochondrial	Uqcrh	21539599	992.493	LELCDNR	1.75328	2.03247
cytochrome c-type heme lyase isoform X1	Hccs	569011696	1568.71	AYDYVECPVTGAR	1.61067	3.77117
cytoplasmic dynein 1 heavy chain 1	Dync1h1	134288917	1701.85	IQFVGACNPPTDPGR	2.52251	4.18671
cytosol aminopeptidase	Lap3	255069715	1766.89	ADMGGAATICSAIVSAAK	11.9912	3.6469
cytosol aminopeptidase	Lap3	255069715	1268.65	SAGACTAAAFLR	2.12915	3.40879
D-3-phosphoglycerate dehydrogenase	Phgdh	52353955	2290.13	ALQSGQCAGAALDVFTEEPPR	74.6921	5.28518
D-3-phosphoglycerate dehydrogenase	Phgdh	52353955	2561.27	ALQSGQCAGAALDVFTEEPPRDR	5.89294	3.14093
D-3-phosphoglycerate dehydrogenase	Phgdh	52353955	2121.09	ALVDHENVISCPHLGASTK	5.88126	4.70825
D-beta-hydroxybutyrate dehydrogenase, mitochondrial precursor	Bdh1	170014720	1735.87	TIQLNVCNSEEVEK	1.69798	3.72597
dehydrogenase/reductase SDR family member 1 isoform X1	Dhrs1	568988186	1355.66	GHYLCSVYGAR	1.63103	2.34832
dehydrogenase/reductase SDR family member 1 isoform X1	Dhrs1	568988186	1228.62	LAADCAHELR	2.27284	3.03131
dehydrogenase/reductase SDR family member 13 precursor	Dhrs13	117647267	1822.87	YFANCHVEEVSPAAR	2.05602	3.13456
delta-1-pyrroline-5-carboxylate synthase isoform 2	Aldh18a1	255958294	1120.55	GDECGLALGR	2.44553	3.19306
delta-like protein 3 precursor	Dll3	116292184	3001.44	CSLQPCQNGGLCLDLGHALRCRCR	-	3.36585
DENN domain-containing protein 4C	Dennd4c	300863147	1764.89	LMPGCEVIQATPYGR	3.35805	2.59599
deoxyuridine triphosphatase isoform 2	Dut	21281687	1075.6	IAQLICER	1.93657	2.02659
developmentally-regulated GTP-binding protein 2 isoform X1	Drg2	568971509	1522.75	VYMPCLYVYNK	2.42066	2.51874
dihydrolipoyl dehydrogenase, mitochondrial precursor	Dld	31982856	1597.8	VCHAHPTLSEAFR	1.60714	3.27552
dihydropyrimidinase-related protein 2	Dpysl2	40254595	2143.97	THNSALEYNIFEGMECR	3.04775	4.10882
dihydropyrimidinase-related protein 5 isoform X1	Dpysl5	568934411	1311.73	CHGVPLVTISR	1.29736	2.7953
disintegrin and metalloproteinase domain-containing protein 10 precursor	Adam10	150378458	1678.83	TITLQPGSPCNDFR	1.77185	3.06708
DNA (cytosine-5)-methyltransferase 1 isoform X3	Dnmt1	568958805	1321.6	FTSFSVYCSR	1.79418	2.11329
DNA (cytosine-5)-methyltransferase 1 isoform X3	Dnmt1	568958805	2000.03	QFSTLIPWCLPHTGNR	1.96729	3.24914
DNA replication licensing factor MCM2	Mcm2	172088119	1367.71	CTVIAAANPIGGR	1.48212	3.44796
DNA replication licensing factor MCM2	Mcm2	172088119	1080.6	FDVLCVVR	2.40577	2.99923
DNA replication licensing factor MCM2	Mcm2	172088119	1268.63	GVCLIDEFDK	1.9178	2.65162
DNA replication licensing factor MCM2	Mcm2	172088119	2037.08	TSGVVTSCTGVLPQLSMVK	2.03557	5.11768
DNA replication licensing factor MCM3	Mcm3	33859484	1445.73	CSVLAAANPVYGR	1.51322	4.01309
DNA replication licensing factor MCM3	Mcm3	33859484	1854.87	EEPFSSEEIQACLSR	8.86635	4.23603
DNA replication licensing factor MCM3	Mcm3	33859484	1254.61	GVVCIDEFDK	1.97703	2.33217
DNA replication licensing factor MCM3	Mcm3	33859484	2125.01	NREEPFSSEEIQACLSR	2.51723	4.19027
DNA replication licensing factor MCM3	Mcm3	33859484	1090.64	TVLIACNVK	1.9394	2.2725
DNA replication licensing factor MCM3	Mcm3	33859484	1047.53	YVLCTAPR	1.85518	2.64165
DNA replication licensing factor MCM4	Mcm4	255918149	1188.66	AGIICQLNAR	1.52209	2.24833
DNA replication licensing factor MCM5	Mcm5	700274133	1232.65	AIACLLFGGSR	1.75076	3.55079
DNA replication licensing factor MCM5	Mcm5	700274133	1419.71	CSVLAAANSVFGR	1.24471	3.69363
DNA replication licensing factor MCM5	Mcm5	700274133	1195.55	HMQLYCDR	1.94134	2.78119
DNA replication licensing factor MCM6	Mcm6	6678832	1088.53	LGFAEYCR	2.62036	2.67338
DNA replication licensing factor MCM6	Mcm6	6678832	1667.92	LVFLACHVAPTNPR	2.05998	3.19257
DNA replication licensing factor MCM7 isoform X1	Mcm7	568938407	1436.74	CSILAAANPAYGR	1.62711	3.72908
DNA topoisomerase 1	Top1	112734855	1254.68	AVAILCNHQR	0.371507	2.71723
DNA-directed RNA polymerase II subunit RPB2	Polr2b	226958589	1485.75	STYCLLNGLTDR	2.15192	3.23869
dnaJ homolog subfamily C member 3 precursor	Dnajc3	31542563	1097.54	ICHCFSK	14.7388	2.2725
dnaJ homolog subfamily C member 3 precursor	Dnajc3	31542563	2033.02	ICSEVLQMEPDNVNALK	1.61816	5.36765
dolichol-phosphate mannosyltransferase subunit 3 isoform X2	Dpm3	568923852	1464.67	VATFHDCEDAAR	1.80484	2.58942
dolichyl-diphosphooligosaccharide--protein glycosyltransferase 48 kDa subunit precursor	Ddost	46195798	1714.76	ELGSECGIEFDEEK	2.23921	4.29456
dynamin 1-like isoform X12	Dnm1l	568996397	1934.99	IIQHCSNYSTQELLR	2.0177	3.32137
dynein light chain 2, cytoplasmic	Dynll2	18087731	1475.73	YNPTWHCIVGR	1.75025	2.90297
E3 ubiquitin-protein ligase NEDD4	Nedd4	56699423	2238.07	LAVCGNPATSQPVTSSNHSSR	1.98795	3.17138
E3 ubiquitin-protein ligase UBR4	Ubr4	237820660	1579.74	HNTYLQECTGQR	2.45209	3.38094
electron transfer flavoprotein subunit alpha, mitochondrial	Etfa	227500281	1363.74	LGGEVSCLVAGTK	1.84305	4.50284
elongation factor 1-alpha 1	Eef1a1	126032329	3068.47	SGDAAIVDMVPGKPMCVESFSDYPPLGR	2.1432	4.10192
elongation factor 1-gamma	Eef1g	110625979	1682.86	WFLTCINQPQFR	1.34214	4.40134
elongation factor 2	Eef2	33859482	2080.97	CELLYEGPPDDEAAMGIK	1.33371	4.88698
elongation factor 2	Eef2	33859482	1446.75	CLYASVLTAQPR	1.19325	4.60274
elongation factor 2	Eef2	33859482	1512.75	DLEEDHACIPIK	2.21804	2.63206
elongation factor 2	Eef2	33859482	1640.85	DLEEDHACIPIKK	1.56773	3.42065
elongation factor 2	Eef2	33859482	1281.57	EGALCEENMR	2.18916	2.25392
elongation factor 2	Eef2	33859482	1667.83	ETVSEESNVLCLSK	0.889872	4.70823
elongation factor 2	Eef2	33859482	1607.88	RCLYASVLTAQPR	1.26172	4.36537
elongation factor 2	Eef2	33859482	1191.6	STLTDSLVCK	2.06223	2.86703
elongation factor G, mitochondrial	Gfm1	170650599	1866.9	YQPCSPSTQEELINK	2.18468	2.26958
elongator complex protein 2 isoform X1	Elp2	569004264	1161.63	VNCLQWIR	1.69962	2.70892
endoplasmic reticulum resident protein 44 precursor	Erp44	19072792	1516.69	VDCDQHSDIAQR	1.89578	3.00124
endoplasmin precursor	Hsp90b1	6755863	2429.14	LTESPCALVASQYGWSGNMER	2.04238	6.12562
ER membrane protein complex subunit 8	Emc8	6754870	2392.1	FTMDCAAPTIHVYEQHENR	2.56731	3.60947
ERO1-like protein beta isoform X3	Ero1lb	568981946	1914.93	VWNSIYEENCFKPR	1.93322	4.04553
ERO1-like protein beta isoform X3	Ero1lb	568981946	2011.77	YDDSQDHFCELDDER	1.73138	4.41802
eukaryotic peptide chain release factor GTP-binding subunit ERF3B	Gspt2	58331156	1313.69	TAGTICLETFK	1.41514	2.16846
eukaryotic translation initiation factor 1A-like	LOC102642868	568904537	1270.6	LEAMCFDGVR	1.77956	2.59371
eukaryotic translation initiation factor 2 subunit 1	Eif2s1	13385624	1494.74	AGLNCSTETMPIK	0.827489	3.1671
eukaryotic translation initiation factor 2 subunit 3-like	LOC102642679	568904743	1968.9	SCGSSTPDEFPTDIPGTK	2.04066	4.19252
eukaryotic translation initiation factor 2 subunit 3-like	LOC102642679	568904743	1795.86	SFDVNKPGCEVDDLK	2.47678	2.29814
eukaryotic translation initiation factor 3 subunit A	Eif3a	146219837	1000.51	HCDLQVR	1.72241	2.28919
eukaryotic translation initiation factor 3 subunit B	Eif3b	29789343	1992.97	FSHQGVQLIDFSPCER	2.04836	4.09161
eukaryotic translation initiation factor 3 subunit B	Eif3b	29789343	1328.6	YWLEEAECR	2.86316	2.60449
eukaryotic translation initiation factor 3 subunit D isoform X1	Eif3d	568992908	2383.15	NLAMEATYINHNFSQQCLR	2.85682	3.75435
eukaryotic translation initiation factor 3 subunit M	Eif3m	21703762	1296.7	LLYEALVDCK	2.35997	2.69567
eukaryotic translation initiation factor 4B	Eif4b	167234372	1664.82	VDVVGATQGQAGSCSR	1.91372	4.39877
eukaryotic translation initiation factor 4E isoform X2	Eif4e	568921782	1460.69	IAIWTTECENR	2.12991	2.93438
eukaryotic translation initiation factor 5A-2	Eif5a2	29243942	2105.98	YEDICPSTHNMDVPNIK	0.919043	2.41371
eukaryotic translation initiation factor 6	Eif6	27501448	2616.32	LSALGNVTTCNDYVALVHPDLDR	1.86273	4.1766
exosome complex component RRP40	Exosc3	39930417	2317.22	NRPNVQVGDLIYGQCVVANK	2.22369	3.32289
exportin-2	Cse1l	12963737	1554.77	SQICDNAALYAQK	1.38402	3.43348
FACT complex subunit SPT16	Supt16	154350222	1427.72	INFYCPGSALGR	2.52982	2.63036
factor, arginine/serine-rich 2, interacting protein isoform X2	Scaf11	568993406	1830.8	EFCADHDISPDTSLR	1.48818	2.28559
factor, arginine/serine-rich 2, interacting protein isoform X2	Scaf11	568993406	1650.68	MESCEGETAQGLDR	4.05247	4.49475
fatty acid synthase	Fasn	93102409	1370.56	DCMLGMEFSGR	1.75977	3.04262
fatty acid synthase	Fasn	93102409	1798.86	DPETLLGYSMVGCQR	1.8778	4.97905
fatty acid synthase	Fasn	93102409	1274.59	LGMLSPDGTCR	1.22199	2.3446
fatty acid synthase	Fasn	93102409	1323.54	SFDDSGSGYCR	2.05251	3.01305
fatty acid synthase	Fasn	93102409	1407.72	SFYGTALFLCR	1.83416	3.24158
F-box only protein 2 isoform X1	Fbxo2	568931131	1742.96	VLAELPATELVQACR	2.21	4.01093
F-box/LRR-repeat protein 15	Fbxl15	140970874	1182.6	ALGALAEGCPR	1.66511	2.33803
filamin-B isoform X2	Flnb	568985493	1512.75	ACIPQSFTVDSSK	2.19301	2.52672
filamin-B isoform X2	Flnb	568985493	1730.73	IEYDDQNDGSCDVK	2.76137	4.45612
filamin-B isoform X2	Flnb	568985493	1579.72	MDGTYACSYTPLK	1.75812	4.25097
filamin-B isoform X2	Flnb	568985493	1276.64	VAVTEGCQPSR	1.60282	2.11521
filamin-B isoform X2	Flnb	568985493	1695.79	VDIQTEDLEDGTCK	2.67839	3.89198
fragile X mental retardation syndrome-related protein 1 isoform 3	Fxr1	17998694	1276.63	CTVDVPEDLR	1.49244	2.45752
fragile X mental retardation syndrome-related protein 2	Fxr2	83921589	1689.8	ANEQEPCGWWLAR	1.55038	3.16791
fructose-bisphosphate aldolase A isoform X2	Aldoa	568949350	1200.61	ALANSLACQGK	2.15349	3.6341
fructose-bisphosphate aldolase A isoform X2	Aldoa	568949350	3093.57	YASICQQNGIVPIVEPEILPDGDHDLK	2.15637	5.1198
galectin-3-binding protein isoform X1	Lgals3bp	568972236	1248.62	VDAECMPVVR	2.51489	2.75191
gamma-interferon-inducible lysosomal thiol reductase precursor	Ifi30	125628657	1378.72	LNMVEACLLDK	-	2.14901
general vesicular transport factor p115	Uso1	23956096	1471.73	LQTENCELLQR	2.18891	3.46321
general vesicular transport factor p115	Uso1	23956096	1815.94	VLVSPTNPPGATSSCQK	1.89051	4.43785
glucosamine 6-phosphate N-acetyltransferase isoform X3	Gnpnat1	568988218	1379.66	VEDVVVSDECR	6.58022	3.71682
glucosidase 2 subunit beta isoform 2 precursor	Prkcsh	652697818	1625.73	YEQGTGCWQGPNR	2.28902	3.8913
glutamine synthetase	Glul	31982332	1992.01	RPSANCDPYAVTEAIVR	-	2.39286
glutamine synthetase	Glul	31982332	1882.86	TCLLNETGDEPFQYK	1.27356	4.22827
glutamine--fructose-6-phosphate aminotransferase [isomerizing] 1	Gfpt1	7305085	1354.7	CQNALQQVVAR	1.30489	3.65396
glutamine--fructose-6-phosphate aminotransferase [isomerizing] 1	Gfpt1	7305085	2128.05	ETDCGVHINAGPEIGVASTK	1.73198	2.49379
glutaminyl-tRNA synthetase isoform 2	Qars	269954679	1137.59	ANNGICFLR	3.08527	2.19583
glutathione S-transferase Mu 3	Gstm3	33468899	1173.58	CLDAFPNLR	1.17903	2.54128
glutathione S-transferase Mu 5	Gstm5	6754086	1426.6	YICGEAPDYDR	2.00586	2.85194
glyceraldehyde-3-phosphate dehydrogenase-like isoform 2	Gm20899	149273202	1629.87	VPTPNVSVVDLTCR	2.37978	4.03197
glycerol-3-phosphate dehydrogenase, mitochondrial precursor	Gpd2	224922803	1639.82	CKDVLTGQEFDVR	2.24702	3.3599
glycerol-3-phosphate dehydrogenase, mitochondrial precursor	Gpd2	224922803	1595.79	CVINASGPFTDSVR	1.50713	3.59255
glycerol-3-phosphate dehydrogenase, mitochondrial precursor	Gpd2	224922803	1488.69	EYACTAVDMISR	2.14631	3.12131
glycine--tRNA ligase	Gars	93102417	1699.82	TSYGWIEIVGCADR	10.1183	4.19895
glycylpeptide N-tetradecanoyltransferase 2 isoform c	Nmt2	594150381	1476.74	AMELLSACQGPAR	2.04779	3.41541
GMP reductase 1	Gmpr	17975500	1262.66	VGVGPGSVCTTR	1.86373	2.72159
GMP synthase [glutamine-hydrolyzing]	Gmps	85861218	1318.61	SYSYVCGISSK	-	2.71241
Golgi apparatus protein 1 precursor	Glg1	6677905	1069.51	CNVENLPR	1.49183	2.2814
Golgi apparatus protein 1 precursor	Glg1	6677905	1341.6	FCENTQAGEGR	1.08315	2.81613
Golgi apparatus protein 1 precursor	Glg1	6677905	1295.6	LSSDCEDQIR	2.43848	2.65973
Golgi apparatus protein 1 precursor	Glg1	6677905	1774.79	QVSSECQGEMLDYR	2.02087	2.97011
Golgi resident protein GCP60	Acbd3	229608928	1977.87	DCHEEVYAGSHQYPGR	1.56935	4.10975
Golgi-specific brefeldin A-resistance guanine nucleotide exchange factor 1 isoform X3	Gbf1	569006203	1177.62	FSCLLPDPR	2.0211	2.6048
GPI inositol-deacylase	Pgap1	254028203	1336.63	LCANDAEDSLR	1.8562	3.06115
granulins precursor	Grn	224967126	1664.74	HCCPGGFHCSAR	-	2.60632
granulins precursor	Grn	224967126	2125.01	VHCCPHGASCDLVHTR	-	3.11128
guanine nucleotide-binding protein G(i) subunit alpha-2 isoform X1	Gnai2	568962761	1589.78	LWADHGVQACFGR	1.98407	3.44538
guanine nucleotide-binding protein G(I)/G(S)/G(O) subunit gamma-12 isoform X1	Gng12	568940670	1712.75	ASADLMSYCEEHAR	1.7293	2.41934
guanine nucleotide-binding protein G(I)/G(S)/G(T) subunit beta-1	Gnb1	229608938	1298.65	LFVSGACDASAK	1.90637	3.13006
guanine nucleotide-binding protein G(I)/G(S)/G(T) subunit beta-2 isoform X1	Gnb2	568938402	2005.01	ACGDSTLTQITAGLDPVGR	2.03218	4.4564
guanine nucleotide-binding protein G(I)/G(S)/G(T) subunit beta-2 isoform X1	Gnb2	568938402	1328.66	TFVSGACDASIK	-	3.56771
guanine nucleotide-binding protein G(k) subunit alpha	Gnai3	33563256	1169.55	DGGVQACFSR	2.29652	3.16623
guanine nucleotide-binding protein G(k) subunit alpha	Gnai3	33563256	1183.59	LFDSICNNK	-	2.324
guanine nucleotide-binding protein G(o) subunit alpha isoform B	Gnao1	164607137	1649.74	LWGDSGIQECFNR	1.96147	4.5636
guanine nucleotide-binding protein G(z) subunit alpha isoform X1	Gnaz	568966705	1425.75	IPLSVCFPEYK	-	2.48526
guanine nucleotide-binding protein subunit beta-2-like 1	Gnb2l1	6680047	1980.96	FSPNSSNPIIVSCGWDK	1.92531	4.39762
guanine nucleotide-binding protein subunit beta-2-like 1	Gnb2l1	6680047	2816.38	TNHIGHTGYLNTVTVSPDGSLCASGGK	1.05565	3.23138
guanine nucleotide-binding protein subunit beta-2-like 1	Gnb2l1	6680047	2054.94	YTVQDESHSEWVSCVR	2.53936	3.52878
guanine nucleotide-binding protein subunit beta-2-like 1	Gnb2l1	6680047	1434.72	YWLCAATGPSIK	1.74071	4.03263
heat shock 70 kDa protein 4	Hspa4	112293266	1455.71	FLEMCDDLLAR	2.01673	2.93856
heat shock 70 kDa protein 4	Hspa4	112293266	1721.88	SVMDATQIAGLNCLR	2.39646	4.96799
heat shock 70 kDa protein 4L isoform X2	Hspa4l	568921291	1579.84	AQFEQLCASLLAR	3.57203	3.93471
heat shock cognate 71 kDa protein	Hspa8	31981690	1345.65	CNEIISWLDK	-	2.95538
heat shock cognate 71 kDa protein	Hspa8	31981690	1017.59	VCNPIITK	2.04346	2.31629
heat shock protein 105 kDa isoform X2	Hsph1	568939259	1483.66	NAVEECVYEFR	1.58171	3.51951
heat shock protein 75 kDa, mitochondrial isoform X1	Trap1	568996112	1356.68	NIYYLCAPNR	2.4081	2.59257
heat shock protein HSP 90-beta	Hsp90ab1	40556608	883.444	FENLCK	2.0817	2.11154
heterogeneous nuclear ribonucleoprotein A3-like, partial	LOC1LOC10264101302642679	568904783	1410.7	WGTLTDCVVMR	1.96171	3.48765
heterogeneous nuclear ribonucleoprotein D0 isoform d	Hnrnpd	116256516	1235.6	FGEVVDCTIK	-	2.95029
heterogeneous nuclear ribonucleoprotein D0 isoform d	Hnrnpd	116256516	1092.56	GFCFITFK	1.83289	2.24329
heterogeneous nuclear ribonucleoprotein D-like isoform X3	Hnrnpdl	568935917	1778.84	GFCFITYTDEEPVK	1.11664	3.32133
heterogeneous nuclear ribonucleoprotein F isoform X1	Hnrnpf	568943326	1689.75	DLSYCLSGMYDHR	2.35406	3.34832
heterogeneous nuclear ribonucleoprotein F isoform X1	Hnrnpf	568943326	2285.02	YGDSEFTVQSTTGHCVHMR	2.4596	4.24373
heterogeneous nuclear ribonucleoprotein H isoform X9	Hnrnph1	568975126	1572.72	GLPWSCSADEVQR	1.80624	3.79385
heterogeneous nuclear ribonucleoprotein H isoform X9	Hnrnph1	568975126	2165.92	YGDGGSTFQSTTGHCVHMR	1.79139	3.85508
heterogeneous nuclear ribonucleoprotein H2 isoform X1	Hnrnph2	569011433	1669.68	DLNYCFSGMSDHR	-	3.19799
heterogeneous nuclear ribonucleoprotein H2 isoform X1	Hnrnph2	569011433	1594.75	GLPWSCSAEEVMR	2.05737	3.13121
heterogeneous nuclear ribonucleoprotein H2 isoform X1	Hnrnph2	569011433	2156.94	YGDGGSSFQSTTGHCVHMR	1.99275	4.20432
heterogeneous nuclear ribonucleoprotein H2 isoform X1	Hnrnph2	569011433	2172.93	YGDGGSSFQSTTGHCVHMoR	2.11046	2.82318
heterogeneous nuclear ribonucleoprotein K isoform 4	Hnrnpk	672424492	1171.52	GSDFDCELR	2.16656	2.73251
heterogeneous nuclear ribonucleoprotein K isoform 4	Hnrnpk	672424492	815.438	VVECIK	1.51072	2.19781
heterogeneous nuclear ribonucleoprotein L isoform X4	Hnrnpl	568944898	1194.57	LCFSTAQHAS	2.07338	2.12767
heterogeneous nuclear ribonucleoprotein M isoform b	Hnrnpm	158186704	982.513	GCAVVEFK	2.61	2.05811
heterogeneous nuclear ribonucleoprotein R isoform b [	Hnrnpr	459683868	1236.62	GYAFITFCGK	1.37376	2.85563
heterogeneous nuclear ribonucleoprotein U	Hnrnpu	160333923	1202.59	MCLFAGFQR	1.29526	3.26736
heterogeneous nuclear ribonucleoprotein U-like 2 isoform X1	Hnrnpul2	569007769	1900.91	NFILDQCNVYNSGQR	2.09681	4.98359
heterogeneous nuclear ribonucleoproteins A2/B1-like isoform X2	LOC102642938	568904641	1066.55	LTDCVVMR	2.128	2.68131
high mobility group protein B2 isoform X1	Hmgb2	568955035	1564.7	MSSYAFFVQTCR	1.96849	3.74108
high mobility group protein B2 isoform X1	Hmgb2	568955035	2026.05	RPPSAFFLFCSENRPK	1.5528	4.74883
hippocalcin-like protein 1-like	Gm4120	568978484	1425.68	LLQCDPSSASQF	1.66321	2.43148
histidine--tRNA ligase, cytoplasmic	Hars	251823891	1681.84	ILDGMFAVCGVPDSK	33.376	3.30279
histone deacetylase 6 isoform X1	Hdac6	569008635	1571.81	IMCHLEEVGLAAR	1.43502	3.78584
histone deacetylase 6 isoform X1	Hdac6	569008635	2363.04	MMSHCNLWDNHHPETPQR	1.50834	2.65454
host cell factor 1	Hcfc1	34328130	1242.65	AGHCAVAINTR	1.94307	2.52118
host cell factor 1	Hcfc1	34328130	990.525	VAGINACGR	2.05972	2.42007
huntingtin-interacting protein 1-related protein isoform X5	Hip1r	568937294	1357.65	CTSSPDYLVSR	-	2.74527
hydroxymethylglutaryl-CoA synthase, cytoplasmic	Hmgcs1	612339316	1280.62	HSLSYDCIGR	2.49036	2.37961
hypoxanthine-guanine phosphoribosyltransferase	Hprt	96975138	1544.79	DLNHVCVISETGK	2.45438	3.44958
hypoxia up-regulated protein 1 isoform X4	Hyou1	568958751	1113.6	LCQGLFFR	1.31135	2.93822
hypoxia up-regulated protein 1 isoform X4	Hyou1	568958751	1715.81	VEFEELCADLFDR	2.40197	4.11252
importin subunit alpha-1	Kpna2	6754474	1445.72	NLTWTLSNLCR	-	2.68291
importin subunit alpha-7	Kpna6	227116300	1371.69	NAVWALSNLCR	1.65191	3.23704
importin subunit beta-1	Kpnb1	88014720	1740.9	ESCLEAYTGIVQGLK	3.49295	4.23252
importin-4 isoform X2	Ipo4	568989000	1062.55	DNICGALAR	3.28968	2.44557
importin-4 isoform X2	Ipo4	568989000	1329.71	TCGSLALQPPGR	2.18861	2.2718
importin-5 isoform X4	Ipo5	568988763	1678.82	ENVNATENCISAVGK	5.83586	3.26197
importin-5 isoform X4	Ipo5	568988763	1204.64	ICDIAAELAR	1.41786	2.92762
importin-5 isoform X4	Ipo5	568988763	1508.71	LCGDTNLNNMQR	-	3.29357
importin-5 isoform X4	Ipo5	568988763	1944.92	MLVQCMQDQEHPSIR	1.1879	2.41958
importin-5 isoform X4	Ipo5	568988763	1703.89	VAAAESMPLLLECAR	1.61159	4.08807
importin-5 isoform X4	Ipo5	568988763	2220.03	YAACNAVGQMATDFAPGFQK	-	2.52609
importin-9 isoform X2	Ipo9	568908754	1326.66	AIWGYCDQLK	1.93782	2.17054
inorganic pyrophosphatase	Ppa1	27754065	1730.82	GISCMNTTVSESPFK	2.80702	4.64837
inosine-5'-monophosphate dehydrogenase 2	Impdh2	31981382	1503.75	HGFCGIPITDTGR	2.11716	3.11205
inositol monophosphatase 1	Impa1	31980942	1238.72	LCSIPIHGIR	1.58316	2.38374
isoamyl acetate-hydrolyzing esterase 1 homolog isoform X3	Iah1	568977938	1937.01	LNSVVGEYANACLQVAR	3.39076	4.70984
isoamyl acetate-hydrolyzing esterase 1 homolog isoform X3	Iah1	568977938	1910.06	VILITPPPLCEAAWEK	4.02332	2.63895
isocitrate dehydrogenase [NAD] subunit alpha, mitochondrial precursor	Idh3a	18250284	1196.65	IEAACFATIK	2.15714	2.28096
isocitrate dehydrogenase [NAD] subunit gamma 1, mitochondrial isoform X2	Idh3g	569009753	2727.25	HACVPVDFEEVHVSSNADEEDIR	2.2419	5.79457
isocitrate dehydrogenase [NADP], mitochondrial precursor	Idh2	225579033	1206.59	CATITPDEAR	0.805955	2.22771
isocitrate dehydrogenase [NADP], mitochondrial precursor	Idh2	225579033	1171.57	SSGGFVWACK	2.12171	2.59963
isocitrate dehydrogenase [NADP], mitochondrial precursor	Idh2	225579033	1482.74	VCVQTVESGAMTK	1.63442	4.43687
kinesin heavy chain isoform 5C	Kif5c	45433560	1305.67	ILQDSLGGNCR	2.27663	3.49477
kinesin light chain 1 isoform 1A	Klc1	131412198	1314.63	LCQENQWLR	1.60221	2.28757
lamina-associated polypeptide 2 isoform alpha	Tmpo	121949760	1419.6	MSACAMGSSTMGR	1.7499	4.12991
lamina-associated polypeptide 2 isoform beta	Tmpo	121949769	2076.95	EMFPYEASTPTGISASCR	1.90369	3.65289
lanosterol synthase isoform X3	Lss	568966805	1425.69	ETLNQGLDFCR	3.0347	2.2399
large proline-rich protein BAG6 isoform 3	Bag6	357197139	2328.05	YCEVLGAAATTDYNNNHEGR	1.66775	2.40904
legumain precursor	Lgmn	7242187	1792.88	HQADACHAYQIIHR	-	2.52962
leucine-rich alpha-2-glycoprotein precursor	Lrg1	16418335	934.487	NLADLCR	2.37648	2.074
leucine-rich PPR motif-containing protein, mitochondrial precursor	Lrpprc	134031976	1599.81	SCGSLLPELSLAER	3.23699	3.68669
leucine-rich PPR motif-containing protein, mitochondrial precursor	Lrpprc	134031976	2296.18	VFESTCSSGSPGSNQALLLLR	1.50755	5.32108
leucine-rich repeat-containing protein 4 precursor	Lrrc4	124339785	1298.67	YLNLGMCNLK	1.84082	2.23606
leucine-rich repeat-containing protein 59	Lrrc59	19527026	1193.63	ATVLDLSCNK	-	2.1145
L-gulonolactone oxidase	Gulo	30520195	1493.76	GDDILLSPCFQR	81.5171	3.06259
lip and palate transmembrane protein 1 homolog isoform X1	Clptm1	568946281	1304.68	VAGIFPCPTFK	1.59962	2.17617
lon protease homolog, mitochondrial precursor	Lonp1	116089322	1486.82	AGVTCIILPAENR	2.18633	3.08383
long-chain-fatty-acid--CoA ligase 5 isoform X1	Acsl5	569007473	1528.82	ADIPVVICDTPQK	1.58119	2.95162
lupus La protein homolog isoform X1	Ssb	568916096	1386.61	FSGDLDDQTCR	3.6774	3.53686
lysophosphatidylcholine acyltransferase 1 isoform X2	Lpcat1	568983226	1478.78	LPADTCLLEFAR	1.05305	2.7488
macrophage migration inhibitory factor	Mif	6754696	1119.63	LLCGLLSDR	1.76417	3.06295
major prion protein precursor	Prnp	13173473	1585.78	VVEQMCVTQYQK	2.84393	3.71861
major vault protein	Mvp	239052674	1388.72	HYCIVANPVSR	2.23704	2.67154
malate dehydrogenase, cytoplasmic	Mdh1	254540027	1099.53	ENFSCLTR	1.91223	2.22861
malate dehydrogenase, cytoplasmic	Mdh1	254540027	1825.96	VIVVGNPANTNCLTASK	1.21128	4.38067
malate dehydrogenase, mitochondrial precursor	Mdh2	31982186	1436.68	EGVVECSFVQSK	1.75806	2.98775
malate dehydrogenase, mitochondrial precursor	Mdh2	31982186	1411.78	GCDVVVIPAGVPR	1.90005	3.05218
malate dehydrogenase, mitochondrial precursor	Mdh2	31982186	1443.84	TIIPLISQCTPK	2.10679	2.14356
mannose-1-phosphate guanyltransferase alpha isoform X7	Gmppa	568907775	1299.79	LLPAITILGCR	2.05804	2.62379
mannose-1-phosphate guanyltransferase beta isoform X1	Gmppb	568963019	1398.68	YGVVVCEADTGR	1.57437	3.89418
mannosyl-oligosaccharide glucosidase	Mogs	31981106	1005.54	CWVALGAR	1.2449	2.06053
mannosyl-oligosaccharide glucosidase	Mogs	31981106	2372	HTCEQGDGVGPYGWEFHDGR	1.88263	3.28269
membrane-associated progesterone receptor component 2	Pgrmc2	226442772	1899.94	GLCSGPGAGEESPAATLPR	2.22366	4.93782
mesencephalic astrocyte-derived neurotrophic factor isoform X1	Manf	568963192	1629.76	LCYYIGATDDAATK	1.85528	3.7831
methionine--tRNA ligase, cytoplasmic isoform X1	Mars	568967394	1729.96	ILATSFICTLPAGHR	2.44663	2.9203
methylcrotonoyl-CoA carboxylase subunit alpha, mitochondrial	Mccc1	186700620	1608.84	YCLHQYNIVGLR	0.932091	3.04939
methylthioribulose-1-phosphate dehydratase	Apip	258613873	2036.95	MAHAMNEYPDSCAVLVR	2.86995	3.05229
MICOS complex subunit Mic19	Chchd3	21313618	1696.81	YEYHPVCADLQTK	2.21312	2.70773
microtubule-associated protein 1B isoform X1	Map1b	568984258	1725.83	ASLTLFCPEEGDWK	1.59858	2.6858
microtubule-associated protein 1S isoform X2	Map1s	568955484	1424.74	ALCYVISGQGQR	4.06165	2.59635
microtubule-associated protein 4 isoform X8	Map4	568963505	1747.81	ETPGSQPSEPCSGVSR	2.28996	2.24266
microtubule-associated protein RP/EB family member 1	Mapre1	7106301	2343.14	NIELICQENEGENDPVLQR	2.02701	6.03837
mitochondrial 10-formyltetrahydrofolate dehydrogenase isoform X3	Aldh1l2	568967267	1955.93	SCDVKPNDTVDSLYNR	3.43809	3.31023
mitochondrial glutamate carrier 1 isoform X1	Slc25a22	568952448	1771.76	GVNEDTYSGFLDCAR	2.14483	3.68906
mitochondrial-processing peptidase subunit beta precursor	Pmpcb	95113671	1452.71	LCTDVTESEVAR	2.57811	3.65593
mitogen-activated protein kinase 15 isoform X14	Mapk15	568992741	1024.53	LCDFGLAR	1.32634	2.05039
monofunctional C1-tetrahydrofolate synthase, mitochondrial	Mthfd1l	283135114	1800.89	YTQQGFGNLPICMAK	2.4448	4.16134
myb-binding protein 1A	Mybbp1a	31982724	1593.85	SVFGHICPHLTPR	0.989345	2.6461
myosin light polypeptide 6	Myl6	33620739	1414.69	ILYSQCGDVMR	2.25388	2.89455
myosin-9	Myh9	114326446	1085.55	CNGVLEGIR	1.41796	2.84047
myosin-9	Myh9	114326446	1624.76	EDQSILCTGESGAGK	2.51216	4.00316
myosin-9	Myh9	114326546	1941.93	YADLTEDQLPSCESLK	1.55444	5.66846
N(4)-(beta-N-acetylglucosaminyl)-L-asparaginase isoform 2 precursor	Aga	326439050	1205.52	NCQPNYWR	2.08743	2.05281
N-acylneuraminate cytidylyltransferase isoform X1	Cmas	568944119	1603.82	VGLSAVPADACSGAQK	1.69207	3.29122
NADH dehydrogenase [ubiquinone] 1 alpha subcomplex subunit 10, mitochondrial precursor	Ndufa10	13195624	1335.71	VITVDGNICSGK	1.80819	2.9528
NADH dehydrogenase [ubiquinone] 1 alpha subcomplex subunit 12	Ndufa12	27228985	2183.02	WLHCMTDDPPTTNPPTAR	1.59967	2.92605
NADH dehydrogenase [ubiquinone] 1 alpha subcomplex subunit 7	Ndufa7	12963571	1263.59	LSNNYYCTR	1.68875	2.72127
NADH dehydrogenase [ubiquinone] 1 alpha subcomplex subunit 8	Ndufa8	21312012	1383.73	LVNGCALNFFR	1.45349	2.36109
NADH dehydrogenase [ubiquinone] 1 beta subcomplex subunit 9	Ndufb9	29789148	1310.65	HLESWCIHR	-	3.64766
NADH dehydrogenase [ubiquinone] flavoprotein 1, mitochondrial precursor27004	Ndufv1	19526814	1132.62	LVEGCLVGGR	-	2.39046
NADH dehydrogenase [ubiquinone] iron-sulfur protein 2, mitochondrial isoform X1	Ndufs2	568910750	1090.6	IIEQCLNK	1.98853	2.43672
NADH dehydrogenase [ubiquinone] iron-sulfur protein 6, mitochondrial precursor	Ndufs6	56711244	1495.78	IIACDGGGGALGHPK	1.59929	2.51192
NADH dehydrogenase subunit 3	ND3	226453482	1744.77	ANPYECGFDPTSSAR	2.03879	3.90766
NADH-cytochrome b5 reductase 3 isoform X2	Cyb5r3	568991032	2630.28	AVLKDPNDHTVCYLLFANQSEK	-	3.62695
NADH-cytochrome b5 reductase 3 isoform X2	Cyb5r3	568991032	2219.02	DPNDHTVCYLLFANQSEK	1.53952	4.59692
NADPH--cytochrome P450 reductase isoform X1	Por	568938051	1532.75	EVGETLLYYGCR	1.66512	3.56748
NEDD8 ultimate buster 1	Nub1	119360354	1810.84	ACDGNVDHAATHISNR	1.73227	3.07475
NEDD8-activating enzyme E1 catalytic subunit isoform 4	Uba3	686661126	1388.71	LPEHCIEYVR	1.817	2.95148
neurocalcin-delta isoform X1	Ncald	568990538	1395.67	LLQCDPSSAGQF	2.18437	2.1278
neuroendocrine convertase 2 precursor	Pcsk2	6679229	1531.75	FHCVGGSVQNPEK	1.43231	3.97625
neuroendocrine convertase 2 precursor	Pcsk2	6679229	2240.03	TALYDESCSSTLASTFSNGR	2.05237	5.86609
neuronal migration protein doublecortin isoform c	Dcx	46575788	1829.74	YAQDDFSLDENECR	2.56739	4.66845
non-lysosomal glucosylceramidase	Gba2	240120073	1859.82	DSQVYCEDTGGTEAVR	2.33232	5.04755
non-POU domain-containing octamer-binding protein	Nono	255958247	1321.68	FACHSASLTVR	1.85016	4.26923
N-terminal EF-hand calcium-binding protein 2 isoform X1	Necab2	568955953	1146.59	NCFHVAAVR	1.93122	2.53179
nuclear pore complex protein Nup93 isoform X2	Nup93	568957583	1024.57	AVYCIIGR	2.10398	2.49558
nuclear pore membrane glycoprotein 210 isoform X1	Nup210	568942448	1491.73	SSNLLGECSPAQR	3.98759	3.20056
nucleoside diphosphate kinase A	Nme1	37700232	1124.56	GDFCIQVGR	-	3.46914
nucleoside diphosphate kinase A	Nme1	37700232	1243.55	SCAQNWIYE	1.89277	2.58776
nucleus accumbens-associated protein 1 isoform X4	Nacc1	568957419	1336.68	NTLANSCGTGIR	1.19898	3.1343
nudC domain-containing protein 2 isoform 2	Nudcd2	595582100	1348.68	AQDIQCGLQSR	1.94492	3.01181
oligosaccharyltransferase complex subunit OSTC	Ostc	13384930	1496.82	VPFLVLECPNLK	1.41324	3.8328
pappalysin 2 isoform X4	Pappa2	568910817	1794.8	DQFGPLNSPFMASCR	1.12741	3.29443
pappalysin 2 isoform X4	Pappa2	568910817	1520.63	YEGDGVCEDFEK	1.76201	2.38908
paternally-expressed gene 3 protein	Peg3	58331166	1656.79	MCEETFVPSQSLR	2.02502	3.75454
peptidyl-prolyl cis-trans isomerase A-like	Gm9234	568894515	1671.81	IIPGFMCQGGDFTR	1.78074	3.51295
peptidyl-prolyl cis-trans isomerase A-like	Gm9234	568894515	1074.52	ITISDCGQL	1.73083	2.3726
peptidyl-prolyl cis-trans isomerase FKBP4	Fkbp4	6753882	1176.63	TQLAVCQQR	2.35493	2.77558
peroxiredoxin-4 precursor	Prdx4	7948999	2243.99	ENECHFYAGGQVYPGEASR	1.85336	5.23413
PHD finger-like domain-containing protein 5A	Phf5a	24415990	1267.64	HHPDLIFCR	1.66743	2.63078
phenylalanine--tRNA ligase beta subunit	Farsb	31981400	1240.62	HLCAVYYNK	1.84157	2.71252
phosphatidylinositol transfer protein beta isoform isoform 3	Pitpnb	675294842	1273.59	AWNAYPYCR	4.29276	2.03366
phosphoacetylglucosamine mutase isoform 2	Pgm3	255522941	1346.7	LNHLCGADFVK	1.74858	4.24214
phosphoglucomutase-2	Pgm2	227330633	1937.92	LSLCGEESFGTGSDHIR	1.53624	2.37994
phosphoglycerate kinase 1	Pgk1	70778976	1958.87	GCITIIGGGDTATCCAK	-	4.68664
phosphoglycolate phosphatase	Pgp	40254507	1166.65	FIAGTGCLVR	1.88237	2.67
phosphoglycolate phosphatase	Pgp	40254507	2046.97	FIFDCVSQEYGINPER	2.04524	4.92954
phosphoglycolate phosphatase	Pgp	40254507	2110.02	YLQQPDCLLVGTNMDNR	2.15628	4.85683
phosphomevalonate kinase isoform 2	Pmvk	254588058	1154.64	LGGNICALLR	1.98798	3.24249
phosphoribosyl pyrophosphate amidotransferase	Ppat	26024309	1490.77	DPYGNRPLCIGR	1.90341	2.41853
phosphoserine phosphatase isoform X1	Psph	568937746	1529.72	FCGVEAAVSEMTR	5.34544	4.00373
plasma membrane calcium ATPase 1 isoform X4	Atp2b1	568968339	953.534	TICLAFR	1.61172	2.12209
platelet-activating factor acetylhydrolase IB subunit alpha	Pafah1b1	7305363	2430.16	MVRPNQDGTLIASCSNDQTVR	2.36416	5.10213
platelet-activating factor acetylhydrolase IB subunit gamma	Pafah1b3	6679201	1038.55	LGYTPVCR	2.91987	2.48366
poly(rC)-binding protein 1	Pcbp1	6754994	1745.96	AITIAGVPQSVTECVK	1.64725	3.64237
poly(rC)-binding protein 1	Pcbp1	6754994	1361.66	INISEGNCPER	-	3.6527
poly(rC)-binding protein 1	Pcbp1	6754994	1515.87	LVVPATQCGSLIGK	-	3.17044
poly(rC)-binding protein 1	Pcbp1	6754994	2548.25	VMTIPYQPMPASSPVICAGGQDR	2.12661	5.58151
poly(rC)-binding protein 2 isoform X6	Pcbp2	568991663	1496.82	LVVPASQCGSLIGK	1.85165	2.18362
poly(U)-binding-splicing factor PUF60 isoform c	Puf60	257196186	907.495	ALAIMCR	2.40896	2.31473
polyadenylate-binding protein-interacting protein 1 isoform X3	Paip1	568984435	1462.74	IENVVLDANCSR	-	3.17802
predicted gene 5803	Gm5803	260304980	2038.96	SHFEQWGTLTDCVVMR	2.25479	4.43083
prelamin-A/C isoform X1	Lmna	568921945	1409.67	AQNTWGCGSSLR	2.26651	2.87567
prelamin-A/C isoform X1	Lmna	568921945	1779.78	GSHCSGSGDPAEYNLR	1.70625	2.89109
pre-mRNA-processing factor 19 isoform 3	Prpf19	359718922	1871.89	QELSHALYQHDAACR	2.08502	4.12586
pre-mRNA-splicing factor 38A	Prpf38a	227497256	1058.61	VCDIILPR	1.17042	2.8761
probable ATP-dependent RNA helicase DDX17 isoform X1	Ddx17	568993105	1422.66	CTYLVLDEADR	1.56793	3.1291
probable ATP-dependent RNA helicase DDX17 isoform X1	Ddx17	568993105	2345.04	TTSSANNPNLMYQDECDRR	2.14703	2.55359
probable ATP-dependent RNA helicase DDX5 isoform X1	Ddx5	568971472	1436.76	GDGPICLVLAPTR	-	4.13592
probable ATP-dependent RNA helicase DDX5 isoform X1	Ddx5	568971472	1240.64	GVEICIATPGR	-	2.33141
probable ATP-dependent RNA helicase DDX5 isoform X1	Ddx5	568971472	1860.9	ELAQQVQQVAAEYCR	2.12943	4.53798
probable ATP-dependent RNA helicase DDX5 isoform X1	Ddx5	568971472	1167.62	LIDFLECGK	1.69873	2.2502
probable ubiquitin carboxyl-terminal hydrolase FAF-X isoform X8	Usp9x	569008690	1462.74	VVIQSNDDIACR	3.6122	3.33856
profilin-1	Pfn1	6755040	1239.57	CYEMASHLR	1.29728	2.95899
programmed cell death 6-interacting protein isoform 3	Pdcd6ip	258547156	1488.71	YYDQICSIEPK	1.6798	3.45893
proliferating cell nuclear antigen	Pcna	7242171	1334.68	CAGNEDIITLR	1.44804	3.66614
proliferation-associated protein 2G4	Pa2g4	6755100	1250.64	AAHLCAEAALR	1.69923	3.29505
proliferation-associated protein 2G4	Pa2g4	6755100	1925	SLVEASSSGVSVLSLCEK	2.3691	5.33327
proline-, glutamic acid- and leucine-rich protein 1	Pelp1	257900472	1334.66	NANSDVCAAALR	-	2.68474
prostaglandin E synthase 3-like	LOC102641464	568893112	2140.03	HLNEIDLFHCIDPNDSK	1.78545	3.74285
prostaglandin E synthase 3-like	LOC102641464	568893112	1518.74	LTFSCLGGSDNFK	1.89897	2.34224
proteasome subunit alpha type-1	Psma1	33563282	1026.53	LLCNFMR	1.37674	2.35355
proteasome subunit alpha type-4 isoform X1	Psma4	568961543	1680.86	ATCIGNNSAAAVSMLK	1.7727	3.33004
proteasome subunit alpha type-5	Psma5	7106387	2236.04	GPQLFHMDPSGTFVQCDAR	1.9586	4.93743
proteasome subunit beta type-2 isoform X1	Psmb2	568929154	934.487	NLADCLR	2.04019	2.25716
protein canopy homolog 2 isoform X2	Cnpy2	568968091	1873.91	SEAHLTELLEEVCDR	2.55093	2.47099
protein canopy homolog 2 isoform X2	Cnpy2	568968091	1305.61	TDLCDHALHR	1.53181	3.16777
protein canopy homolog 4 precursor	Cnpy4	30519939	1426.76	HVLPASETACLR	2.11925	2.37286
protein canopy homolog 4 precursor	Cnpy4	30519939	1443.69	LEEALENLCER	0.745219	2.29625
protein disulfide-isomerase A3 precursor	Pdia3	112293264	2225.05	FIQDSIFGLCPHMTEDNK	1.05657	2.48867
protein disulfide-isomerase precursor	P4hb	42415475	1035.51	ITEFCHR	1.55611	2.01689
protein lin-7 homolog C	Lin7c	6755973	1395.72	VLQSEFCNAVR	2.39141	3.52371
protein Niban	Fam129a	241982745	2248.06	IHPEASHPAAIQQDSCEER	3.54852	3.63255
protein Niban	Fam129a	241982745	1453.71	QYSVAFCNHVR	4.91899	2.87503
protein RCC2 isoform X1	Rcc2	568930420	1361.65	IEYDCELVPR	2.25768	3.25403
protein RCC2 isoform X1	Rcc2	568930420	1896.05	LIEALSHEAIVLAACGR	2.98987	2.95291
protein RCC2 isoform X1	Rcc2	568930420	984.504	YGCLSGVR	2.64883	2.28786
protein SEC13 homolog	Sec13	29150272	2462.22	DVAWAPSIGLPTSTIASCSQDGR	1.80611	3.75855
protein SEC13 homolog	Sec13	29150272	1254.63	FASGGCDNLIK	1.14312	2.32246
protein sel-1 homolog 1 isoform a precursor	Sel1l	84875513	1393.66	LWCATTYDYK	1.90337	2.46614
protein transport protein Sec23A isoform X1	Sec23a	568979157	1520.8	AVLNPLCQVDYR	4.24332	2.46811
protein transport protein Sec23A isoform X1	Sec23a	568979157	1659.83	MVQVHELGCEGISK	1.24673	2.84977
protein transport protein Sec23B isoform 1	Sec23b	357527458	1534.82	AILNPLCQVDYR	0.738151	2.358
protein transport protein Sec23B isoform 1	Sec23b	357527458	1527.91	MVVPLACLLTPLK	1.80817	3.41394
protein transport protein Sec31A isoform X16	Sec31a	568936184	2223.12	SAQLQHAVQSQGFIGYCQK	2.04712	3.43711
protein transport protein Sec31A isoform X16	Sec31a	568936184	1212.55	SCATFSSSHR	1.08989	2.70687
protein transport protein Sec31A isoform X16	Sec31a	568936184	2033.98	TQACLCYICAGNVER	-	4.14001
protein TSSC1 isoform X2	Tssc1	568977817	2079.02	SMSQIYCIENAHGQLVR	3.50062	2.92538
protein TSSC1 isoform X2	Tssc1	568977817	1133.6	VQACAAVWR	2.38149	2.17474
protein TSSC4 isoform 1	Tssc4	9938004	2627.15	SQVSHTDYVPSFNQDPSSCGEGR	1.78933	5.33254
protein tyrosine phosphatase, receptor type, N isoform X2	Ptprn	568907586	2494.19	LAALGPEGAHGDTTFEYQDLCR	2.03273	5.3463
purine nucleoside phosphorylase	Pnp	7305395	1805.88	DHINLPGFCGQNPLR	1.87621	4.27509
putative adenosylhomocysteinase 2 isoform X2	Ahcyl1	568922644	1293.59	FDNLYCCR	-	2.07482
putative E3 ubiquitin-protein ligase UBR7	Ubr7	29789154	1168.51	CSYSQGSVGR	0.833908	3.29063
putative pre-mRNA-splicing factor ATP-dependent RNA helicase DHX15 isoform 1	Dhx15	110835726	1784.86	TTQIPQWCVEYMR	1.73946	2.72106
pyridoxal phosphate phosphatase	Pdxp	47059486	1496.76	AEQLFSSALCAAR	1.36504	3.09661
pyrroline-5-carboxylate reductase 1, mitochondrial isoform X1	Pycr1	568972717	1244.62	CMTNTPVVVR	2.06639	3.30303
pyrroline-5-carboxylate reductase 1, mitochondrial isoform X1	Pycr1	568972717	1513.81	SLLINAVEASCIR	2.68158	4.26601
pyrroline-5-carboxylate reductase 3 isoform X1	Pycrl	568993033	1411.68	AATMSAVEAATCR	2.25023	4.05081
pyrroline-5-carboxylate reductase 3 isoform X1	Pycrl	568993033	2031.03	VSPNLPCVVQEGAMVMAR	1.80878	4.77424
pyruvate carboxylase, mitochondrial isoform X2	Pcx	569005643	1481.69	ADFAQACQDAGVR	2.12749	4.7223
pyruvate carboxylase, mitochondrial isoform X2	Pcx	569005643	1085.62	AGTHILCIK	1.96332	2.30922
pyruvate carboxylase, mitochondrial isoform X2	Pcx	569005643	1243.6	FLYECPWR	1.17115	2.42403
pyruvate dehydrogenase E1 component subunit alpha, somatic form, mitochondrial	Pdha1	6679261	1245.6	VDGMDILCVR	2.75787	2.83825
pyruvate kinase PKM isoform M1	Pkm	359807367	2567.21	AEGSDVANAVLDGADCIMLSGETAK	2.59239	5.4418
pyruvate kinase PKM isoform M1	Pkm	359807367	1541.74	CDENILWLDYK	1.3502	4.16147
pyruvate kinase PKM isoform M1	Pkm	359807367	1006.59	GIFPVLCK	1.84715	2.043
pyruvate kinase PKM isoform M1	Pkm	359807367	1432.77	NTGIICTIGPASR	2.16478	4.42772
rab GDP dissociation inhibitor alpha	Gdi1	33859560	1266.77	IICILSHPIK	1.71614	2.73285
rab GDP dissociation inhibitor alpha	Gdi1	33859560	2267.1	NTNDANSCQIIIPQNQVNR	-	2.63512
rab GDP dissociation inhibitor alpha	Gdi1	33859560	1549.78	QLICDPSYIPDR	25.3335	2.65872
rab GDP dissociation inhibitor alpha	Gdi1	33859560	1925.9	TDDYLDQPCLETINR	1.81303	5.35053
rab GDP dissociation inhibitor beta	Gdi2	116089273	1295.68	QLICDPSYVK	1.88724	2.02779
rab GDP dissociation inhibitor beta	Gdi2	116089273	1252.76	VICILSHPIK	1.88646	2.55859
ran-binding protein 9	Ranbp9	161353515	1362.69	QLCGGSQAAIER	1.9146	2.51216
ras-related C3 botulinum toxin substrate 1 precursor	Rac1	45592934	1654.88	HHCPNTPIILVGTK	1.0944	2.93535
ras-related C3 botulinum toxin substrate 1 precursor	Rac1	45592934	1313.66	YLECSALTQR	1.65727	3.32319
ras-related protein Rab-	Rab1b	21313162	829.465	SCLLLR	1.61398	2.35564
ras-related protein Rab-3A isoform X2	Rab3a	568955316	1048.58	LVDVICEK	2.34077	2.48132
ras-related protein Rab-3D isoform X1	Rab3d	568959035	1048.58	LVDIICDK	1.07541	2.17058
receptor expression-enhancing protein 5	Reep5	161016826	1138.57	NCMTDLLAK	1.37221	2.21543
regulator of nonsense transcripts 1 isoform b	Upf1	170784811	1307.66	LMQGDEICLR	1.72429	2.96132
retinol dehydrogenase 11 isoform X1	Rdh11	568978923	1750.9	MLSSGVCTSNVQLPGK	1.72133	4.12824
ribonuclease inhibitor isoform a	Rnh1	31981748	1250.61	LDDCGLTEVR	2.21393	3.55939
ribonucleoprotein PTB-binding 1	Raver1	29789209	1217.62	VSFCAPGPPGR	1.5656	3.08387
ribonucleoside-diphosphate reductase large subunit	Rrm1	31982026	1438.69	NTAAMVCSLENR	1.38029	4.52498
ribose-phosphate pyrophosphokinase 1	Prps1	10946854	1827.87	FSNQETCVEIGESVR	1.8349	4.39913
ribose-phosphate pyrophosphokinase 1	Prps1	10946854	2335.17	INNACFEAVVVTNTIPQEDK	17.4391	3.63052
ribose-phosphate pyrophosphokinase 1	Prps1	10946854	1466.79	VTAVIPCFPYAR	1.92867	2.61144
RING-box protein 2	Rnf7	110625597	1164.6	VQVMDACLR	1.8948	2.37752
RNA polymerase II subunit A C-terminal domain phosphatase SSU	Ssu72	172088095	1306.67	VAVVCSSNQNR	2.08547	2.27034
rRNA 2'-O-methyltransferase fibrillarin-like	LOC102643269	568889938	1085.53	HEGVFICR	2.13006	2.35794
sarcoplasmic/endoplasmic reticulum calcium ATPase 2 isoform b	Atp2a2	158635979	1049.55	ANACNSVIK	1.7377	2.52453
sarcoplasmic/endoplasmic reticulum calcium ATPase 2 isoform b	Atp2a2	158635979	1425.76	CLALATHDNPLK	0.977546	3.39149
sarcoplasmic/endoplasmic reticulum calcium ATPase 2 isoform b	Atp2a2	158635979	1581.87	CLALATHDNPLKR	0.930088	2.4141
sarcoplasmic/endoplasmic reticulum calcium ATPase 2 isoform b	Atp2a2	158635979	1929.95	NYLEQPGKECVQPATK	1.14936	2.91576
sarcoplasmic/endoplasmic reticulum calcium ATPase 2 isoform b	Atp2a2	158635979	1599.77	SMSVYCTPNKPSR	1.76604	3.09369
sarcoplasmic/endoplasmic reticulum calcium ATPase 3 isoform a	Atp2a3	254039658	1478.65	KEDMHLDDCSR	2.03138	2.93998
sarcoplasmic/endoplasmic reticulum calcium ATPase 3 isoform a	Atp2a3	254039658	1508.69	MFVVAEAEAGTCR	2.14877	4.14958
sarcoplasmic/endoplasmic reticulum calcium ATPase 3 isoform a	Atp2a3	254039658	2099.06	SLPSVETLGCTSVICSDK	-	4.38614
sarcoplasmic/endoplasmic reticulum calcium ATPase 3 isoform a	Atp2a3	254039658	1274.6	SMSVYCTPTR	2.01423	2.63772
sarcoplasmic/endoplasmic reticulum calcium ATPase 3 isoform a	Atp2a3	254039658	1536.72	TGTLTTNQMSVCR	-	3.37367
sarcoplasmic/endoplasmic reticulum calcium ATPase 3 isoform a	Atp2a3	254039658	1693.88	VGEATETALTCLVEK	-	5.44132
scaffold attachment factor B2 isoform X4	Safb2	569000052	1234.68	ILDILGETCK	1.63512	2.45688
SEC16 homolog A isoform X6	Sec16a	568913426	1159.62	FTVPHVCAR	2.19824	2.33022
secernin-1 isoform X1	Scrn1	568942798	1894.89	SSPCIHYFTGTPDPSR	1.48564	3.21491
serine hydroxymethyltransferase, mitochondrial isoform 2	Shmt2	356640163	1433.75	AALEALGSCLNNK	6.62657	4.07235
serine protease 53 isoform X1	Prss53	568950899	1802.88	LISRPTCNCLYNR	-	3.24357
serine/arginine-rich splicing factor 1 isoform 2	Srsf1	118582271	1485.64	EAGDVCYADVYR	1.97589	3.11307
serine/arginine-rich splicing factor 7 isoform X2	Srsf7	569000118	1251.54	GHYAYDCHR	1.92273	2.79194
serine/threonine-protein kinase VRK1 isoform X11	Vrk1	568979546	1803.84	CHDGTLEFTSIDAHK	1.03804	3.44621
serine/threonine-protein kinase VRK1 isoform X11	Vrk1	568979546	2653.18	SVESQGAIHGSMSQPAAGCSSSDSSR	2.11759	5.99869
serine/threonine-protein phosphatase 2A 65 kDa regulatory subunit A alpha isoform	Ppp2r1a	8394027	1631.9	ENVIMTQILPCIK	1.833	4.03506
serine/threonine-protein phosphatase 2A 65 kDa regulatory subunit A alpha isoform	Ppp2r1a	8394027	1380.64	NLCSDDTPMVR	2.27218	2.76376
serine/threonine-protein phosphatase 2A 65 kDa regulatory subunit A alpha isoform	Ppp2r1a	8394027	1663.81	TSACGLFSVCYPR	-	3.57556
serine/threonine-protein phosphatase 2A catalytic subunit beta isoform isoform X1	Ppp2cb	568953915	1988.9	AHQLVMEGYNWCHDR	1.7971	3.90738
serine/threonine-protein phosphatase 2A catalytic subunit beta isoform isoform X1	Ppp2cb	568953915	1751.85	CGNQAAIMELDDTLK	2.50617	3.6942
serine/threonine-protein phosphatase 2A catalytic subunit beta isoform isoform X1	Ppp2cb	568953915	2577.15	LQEVPHEGPMCDLLWSDPDDR	1.76435	3.70309
serine/threonine-protein phosphatase 2A catalytic subunit beta isoform isoform X1	Ppp2cb	568953915	1776.89	NVVTIFSAPNYCYR	1.92387	3.92249
serine/threonine-protein phosphatase 4 regulatory subunit 2 isoform X1	Ppp4r2	568941622	1184.6	LCELLTDPR	1.38952	2.81637
serine/threonine-protein phosphatase 5	Ppp5c	199559777	1367.67	GVSCQFGPDVTK	2.23273	2.99059
serine/threonine-protein phosphatase 5	Ppp5c	199559777	1549.71	TECYGYALGDATR	2.44213	4.55484
serine/threonine-protein phosphatase PP1-beta catalytic	Ppp1cb	161484668	1230.58	GNHECASINR	1.18128	2.82429
serine/threonine-protein phosphatase PP1-beta catalytic	Ppp1cb	161484668	1114.58	HDLDLICR	2.02235	2.50369
serine/threonine-protein phosphatase PP1-beta catalytic	Ppp1cb	161484668	1728.85	ICGDIHGQYTDLLR	1.7672	2.65871
serine/threonine-protein phosphatase PP1-beta catalytic	Ppp1cb	161484668	1267.58	IYGFYDECK	1.62134	2.20561
serine-threonine kinase receptor-associated protein	Strap	160707896	1252.65	GHFGPIHCVR	1.33762	2.32603
serine--tRNA ligase, cytoplasmic isoform 2	Sars	326381098	1079.54	IWGDCTVR	2.79051	2.52766
serine--tRNA ligase, cytoplasmic isoform 2	Sars	326381098	1625.83	TICAILENYQAEK	2.08565	4.09634
serpin B6 isoform X1	Serpinb6a	568981722	1110.58	TNGILFCGR	1.90496	2.04811
serrate RNA effector molecule homolog isoform X4	Srrt	568938564	1418.74	EICWNLQNIR	1.46391	2.19967
short/branched chain specific acyl-CoA dehydrogenase, mitochondrial	Acadsb	17647119	1153.61	GITCFLVDR	1.77533	3.04676
signal recognition particle 72	Srp72	118344452	1261.6	YDECLAVYR	1.87522	2.6364
signal recognition particle subunit SRP68	Srp68	47271535	1344.64	LFESMLSECR	1.96316	3.29827
small glutamine-rich tetratricopeptide repeat-containing protein alpha isoform X1	Sgta	568968038	1824.91	AIELNPANAVYFCNR	2.02594	3.35169
small nuclear ribonucleoprotein F	Snrpf	254028189	1124.6	CNNVLYIR	1.48517	2.69015
small nuclear ribonucleoprotein Sm D2-like	Gm5848	568889928	1316.66	HCNMVLENVK	1.93292	3.66676
small nuclear ribonucleoprotein Sm D2-like	Gm5848	568889928	1304.68	NNTQVLINCR	2.39141	3.70024
small nuclear ribonucleoprotein Sm D3	Snrpd3	13385598	2487.21	VLHEAEGHIVTCETNTGEVYR	1.9866	5.99059
S-methyl-5'-thioadenosine phosphorylase	Mtap	45544618	2055.98	TSLRPQTFYDGSHCSAR	1.89281	4.22426
sodium/potassium-transporting ATPase subunit alpha-1 precursor	Atp1a1	21450277	1158.6	ACVVHGSDLK	15.431	2.50832
sodium/potassium-transporting ATPase subunit alpha-1 precursor	Atp1a1	21450277	1087.6	CSSILLHGK	1.60787	2.77927
sodium/potassium-transporting ATPase subunit alpha-1 precursor	Atp1a1	21450277	876.482	IAGLCNR	2.03538	2.06106
sodium/potassium-transporting ATPase subunit alpha-1 precursor	Atp1a1	21450277	2442.34	IAGLCNRAVFQANQENLPILK	18.9352	3.79489
sodium/potassium-transporting ATPase subunit alpha-1 precursor	Atp1a1	21450277	2536.25	IISANGCKVDNSSLTGESEPQTR	2.01663	4.3568
sodium/potassium-transporting ATPase subunit alpha-1 precursor	Atp1a1	21450277	1584.9	ILDRCSSILLHGK	2.56296	2.84346
sodium/potassium-transporting ATPase subunit alpha-1 precursor	Atp1a1	21450277	1155.63	LIIVEGCQR	2.11637	2.59798
sodium/potassium-transporting ATPase subunit alpha-1 precursor	Atp1a1	21450277	1754.82	NIAFFSTNCVEGTAR	2.35305	4.25427
sodium/potassium-transporting ATPase subunit alpha-1 precursor	Atp1a1	21450277	1997.98	NLEAVETLGSTSTICSDK	1.93239	4.68149
sodium/potassium-transporting ATPase subunit beta-1	Atp1b1	6753138	1562.81	YNPNVLPVQCTGK	2.58068	2.33012
solute carrier family 22 member 16	Slc22a16	110625794	1786.88	NFNLVCDQKWYAR	2.09666	2.58271
sorbin and SH3 domain-containing protein 2 isoform X69	Sorbs2	568954757	1372.61	CDDGWFVGTSR	1.07815	2.07855
sorting and assembly machinery component 50 homolog	Samm50	30519943	1360.67	ICDGVQFGAGIR	1.70633	3.5261
sorting and assembly machinery component 50 homolog	Samm50	30519943	1894.93	LELNYCIPMGVQGGDR	1.89454	4.1885
spliceosome RNA helicase Ddx39b	Ddx39b	356995868	1507.83	KNCPHIVVGTPGR	1.95368	2.37562
spliceosome RNA helicase Ddx39b	Ddx39b	356995868	1379.73	NCPHIVVGTPGR	1.15836	3.54195
splicing factor 3A subunit 1	Sf3a1	165932270	1254.63	EVLDQVCYR	1.1665	2.02781
splicing factor 3B subunit 3 isoform X3	Sf3b3	568955820	1032.54	FGNICVVR	1.24221	2.52141
splicing factor U2AF 35 kDa subunit isoform X1	U2af1	568998616	1736.89	GGFCNFMHLKPISR	1.21279	3.04059
stress-70 protein, mitochondrial	Hspa9	162461907	1926.87	MEEFKDQLPADECNK	5.248	2.58203
stress-induced-phosphoprotein 1	Stip1	14389431	1146.5	CMMAQYNR	1.27979	2.58702
striatin-4 isoform X1	Strn4	568946741	1287.66	TCVQEITAHR	4.2945	2.29015
structural maintenance of chromosomes flexible hinge domain-containing protein 1 isoform X1	Smchd1	569001849	1377.74	ANLGVFTVCAPR	1.5664	3.36482
succinate dehydrogenase [ubiquinone] flavoprotein subunit, mitochondrial precursor	Sdha	54607098	1830.92	AAFGLSEAGFNTACLTK	5.47125	4.8634
succinate dehydrogenase [ubiquinone] flavoprotein subunit, mitochondrial precursor	Sdha	54607098	2324.04	TYFSCTSAHTSTGDGTAMVTR	1.73579	4.46696
succinate dehydrogenase [ubiquinone] iron-sulfur subunit, mitochondrial isoform X1	Sdhb	568931796	1289.71	CGPMVLDALIK	2.29863	2.35209
succinate dehydrogenase cytochrome b560 subunit, mitochondrial	Sdhc	228008307	1529.78	WSLPMALSVCHR	1.22062	3.17947
sulfite oxidase, mitochondrial pr	Suox	74024924	1312.69	LCDVLAQAGHR	1.45119	3.47387
superoxide dismutase [Cu-Zn]	Sod1	45597447	1074.61	LACGVIGIAQ	2.04934	2.65341
suppressor of G2 allele of SKP1 homolog	Sugt1	23956176	1943.87	ALEQNPDDAQYYCQR	2.64715	5.11238
SWI/SNF complex subunit SMARCC2 isoform 3	Smarcc2	37718972	1625.81	LNPQEYLTSTACR	1.93277	3.36352
SWI/SNF complex subunit SMARCC2 isoform 3	Smarcc2	37718972	1287.62	NLAGDVCAIMR	1.71436	2.46883
synaptic vesicle membrane protein VAT-1 homolog	Vat1	33859662	1397.68	ACGLNFADLMGR	1.27856	3.62588
synaptophysin	Syp	166235165	1631.8	LHQVYFDAPSCVK	1.36642	3.66081
synaptophysin	Syp	166235165	2081.06	LHQVYFDAPSCVKGGTTK	1.56283	3.31083
syntaxin-12	Stx12	19527102	1820.87	DFNSIIQTCSGNIQR	1.59785	3.77642
TAR DNA-binding protein 43 isoform 3	Tardbp	56682931	1064.51	NPVSQCMR	1.90911	2.30005
TAR DNA-binding protein 43 isoform 3	Tardbp	56682931	1513.8	VAQSLCGEDLIIK	1.64215	3.41013
TBC1 domain family member 15	Tbc1d15	255958202	1705.79	DDSPTQTLASPNACR	2.34784	4.45113
TBC1 domain family member 15	Tbc1d15	255958202	1525.74	YVVLCESPQDSR	2.45556	3.26758
T-complex protein 1 subunit alpha isoform 2	Tcp1	595582154	1547.61	GANDFMCDEMER	2.44795	3.63934
T-complex protein 1 subunit alpha isoform 2	Tcp1	595582154	1209.64	SLHDALCVVK	1.7742	3.15595
T-complex protein 1 subunit alpha isoform 2	Tcp1	595582154	1376.72	VLCELADLQDK	17.4032	2.37346
T-complex protein 1 subunit beta isoform X1	Cct2	568966542	1627.9	SLHDALCVLAQTVK	1.9846	2.57986
T-complex protein 1 subunit beta isoform X1	Cct2	568966542	2439.18	TVYGGGCSEMLMAHAVTQLANR	1.64766	2.97024
T-complex protein 1 subunit delta	Cct4	6753322	1419.82	IGLIQFCLSAPK	1.62754	3.49631
T-complex protein 1 subunit delta	Cct4	6753322	1256.69	SLHDALCVIR	1.61879	3.87549
T-complex protein 1 subunit delta	Cct4	6753322	1375.65	TLSGMESYCVR	1.9237	2.91074
T-complex protein 1 subunit eta	Cct7	238814391	1861.88	QLCDNAGFDATNILNK	0.816776	2.83578
T-complex protein 1 subunit eta	Cct7	238814391	1206.57	YNFFTGCPK	1.83036	2.1767
T-complex protein 1 subunit gamma	Cct3	6753320	919.55	ACTILLR	2.36349	2.06187
T-complex protein 1 subunit gamma	Cct3	6753320	1501.81	IPGGIIEDSCVLR	2.07389	3.27037
T-complex protein 1 subunit gamma	Cct3	6753320	1307.63	NLQDAMQVCR	2.66209	3.58392
T-complex protein 1 subunit gamma	Cct3	6753320	1406.75	TLIQNCGASTIR	1.86033	3.68805
T-complex protein 1 subunit theta	Cct8	126723461	1904.93	IAVYSCPFDGMITETK	2.47259	3.96496
thioredoxin-related transmembrane protein 1 precursor	Tmx1	33859722	1635.91	FIITALPSIYHCK	1.51422	3.73317
threonine--tRNA ligase, cytoplasmic	Tars	27229277	1249.65	CGPLIDLCR	-	2.4393
transcription elongation factor SPT5 isoform X2	Supt5	568945195	1717.87	VELHSTCQTISVDR	2.22522	3.52326
transcription elongation regulator 1 isoform X6	Tcerg1	569004234	1465.75	YLVLDCVPEER	1.8956	2.51401
transcriptional repressor NF-X1 isoform 3	Nfx1	594190892	2507.12	SEDENTRPVAISHTDSSDASCR	2.2312	3.75762
transducin (beta)-like 2 isoform X2	Tbl2	568938123	1300.58	FEEASTMPCR	2.80468	2.16955
transducin (beta)-like 2 isoform X2	Tbl2	568938123	993.451	FLASCGDR	1.9524	2.32383
transducin (beta)-like 2 isoform X2	Tbl2	568938123	1386.69	FVGSCGFTPDVK	2.1217	3.02832
transferrin receptor protein 1 isoform X1	Tfrc	568995055	1082.51	WNIDSSCK	1.97444	2.34971
transforming protein RhoA isoform X1	Rhoa	568962753	1680.94	HFCPNVPIILVGNK	1.42671	3.22023
transforming protein RhoA isoform X1	Rhoa	568962753	1406.66	IGAFGYMECSAK	2.02614	2.85414
transitional endoplasmic reticulum ATPase	Vcp	225543319	2258.95	EDEEESLNEVGYDDIGGCR	23.5123	5.90437
transitional endoplasmic reticulum ATPase	Vcp	225543319	1608.84	LGDVISIQPCPDVK	1.68973	3.73145
transitional endoplasmic reticulum ATPase	Vcp	225543319	1867.84	MTNGFSGADLTEICQR	2.07389	4.28683
translationally-controlled tumor protein isoform X1	Tpt1	568987470	1500.73	EIADGLCLEVEGK	1.90364	3.26019
transmembrane 9 superfamily member 3 precursor	Tm9sf3	19111162	1357.64	NLSGQPNFPCR	2.18442	2.62479
transmembrane emp24 protein transport domain containing 7 precursor	Tmed7	255003819	1562.73	QCFYEDITQGTK	1.98818	2.08026
transmembrane emp24 protein transport domain containing 7 precursor	Tmed7	255003819	2147.1	VSALTQMESACVSIHEALK	4.28903	2.43084
transmembrane protein 214 isoform X1	Tmem214	568934504	1539.8	SSGLLPVGQQVCAR	1.6618	2.34625
transportin-1 isoform X3	Tnpo1	568984445	1674.89	SHAVACVNQFIISR	1.2504	3.25274
transportin-1 isoform X3	Tnpo1	568984445	1196.62	SITCWTLSR	1.79897	2.11229
trifunctional purine biosynthetic protein adenosine-3 isoform X4	Gart	568997287	1667.82	CFGPTAQAAQLESSK	1.77115	3.69261
triosephosphate isomerase	Tpi1	226958349	1205.6	IAVAAQNCYK	3.55329	3.30285
triosephosphate isomerase	Tpi1	226958349	1394.71	IIYGGSVTGATCK	1.98083	4.04928
triosephosphate isomerase	Tpi1	226958349	1897.04	VSHALAEGLGVIACIGEK	1.62741	3.46213
tRNA-splicing endonuclease subunit Sen15	Tsen15	228008361	1839.91	SDSKPTPGCSGPGPAPVR	1.88485	4.00123
tubulin alpha-1A chain	Tuba1a	6755901	1932.94	AVCMLSNTTAIAEAWAR	-	5.7866
tubulin alpha-1A chain	Tuba1a	6755901	2818.34	AYHEQLSVAEITNACFEPANQMVK	-	3.45789
tubulin alpha-1A chain	Tuba1a	6755901	1671.83	TIQFVDWCPTGFK	1.71727	3.73697
tubulin alpha-1A chain	Tuba1a	6755901	1385.61	YMACCLLYR	-	2.63136
tubulin alpha-4A chain isoform X1	Tuba4a	568907654	1657.82	SIQFVDWCPTGFK	1.95205	4.19361
tubulin beta-4A chain	Tubb4a	31981939	1895.99	EIVHIQAGQCGNQIGAK	1.80628	5.11818
tubulin beta-4A chain	Tubb4a	31981939	1133.46	NMMAACDPR	-	2.88643
tubulin beta-4A chain	Tubb4a	31981939	1096.55	TAVCDIPPR	-	2.4208
tubulin beta-6 chain	Tubb6	27754056	1926	EIVHIQAGQCGNQIGTK	1.61458	3.25266
tubulin-folding cofactor B	Tbcb	170650659	2095.97	LDQEDALLGSYPVDDGCR	1.98749	5.19761
tubulin-specific chaperone D isoform X5	Tbcd	568971131	1220.65	ICQTVGVNTR	8.21183	2.31912
tumor suppressor p53-binding protein 1 isoform X7	Trp53bp1	568917333	1577.75	ADVSCEPLEEVEK	2.9239	3.84243
tyrosine 3-monooxygenase isoform X1	Th	568952746	1287.66	VFQCTQYIR	2.71728	2.30214
U5 small nuclear ribonucleoprotein 200 kDa helicase	Snrnp200	40018610	1281.6	MWQSMCPLR	1.85981	2.36987
U5 small nuclear ribonucleoprotein 200 kDa helicase	Snrnp200	40018610	1281.66	TNVALMCMLR	6.93707	2.40794
U5 small nuclear ribonucleoprotein 200 kDa helicase	Snrnp200	40018610	1695.87	WLSCETQLPVSFR	1.91883	3.25206
ubiquitin carboxyl-terminal hydrolase isozyme L1	Uchl1	188219614	968.533	FSAVALCK	2.40419	2.81581
ubiquitin carboxyl-terminal hydrolase isozyme L1	Uchl1	188219614	2056.96	NEAIQAAHDSVAQEGQCR	2.76576	5.65619
ubiquitin-conjugating enzyme E2 N	Ube2n	18017605	947.569	ICLDILK	1.84749	2.26396
ubiquitin-conjugating enzyme E2 S	UBe2S	19527004	1718.86	LLTEIHGGACSTSSGR	1.96648	2.61229
ubiquitin-like modifier-activating enzyme 1 isoform 2	Uba1	209862989	1064.5	VGEFCHSR	2.1552	2.83329
ubiquitin-like modifier-activating enzyme 6	Uba6	27370032	1334.7	IWSQCVELAR	1.51686	2.23024
UDP-glucose:glycoprotein glucosyltransferase 1 isoform X1	Uggt1	568906530	2167.95	DFNLDGAPYGYTPFCDSR	2.05593	4.77457
uncharacterized protein FLJ45252 homolog	LOC102637099	568943658	2154.02	LGEAALFSESGVCTEPEER	2.02078	5.10316
uncharacterized protein LOC75471	1700009N14Rik	124487358	1651.83	VCENIPIVLCGNK	-	3.80007
UPF0577 protein KIAA1324 isoform X3	5330417C22Rik	568922653	1947.05	VAVPHSPGLCTSLPDPVK	3.11831	4.69251
uroporphyrinogen decarboxylase isoform X2	Urod	568928764	1275.59	AAQDFFSTCR	1.92273	2.43982
vacuolar protein sorting-associated protein 35	Vps35	13928670	1140.59	NYLLQCTR	2.20481	2.5145
valine--tRNA ligase	Vars	255069795	1495.71	CGEMAQAASAAVTR	1.53875	4.86961
valine--tRNA ligase	Vars	255069795	1227.66	ICLQPPPSSR	2.29666	2.1838
vesicle-fusing ATPase	Nsf	31543349	1592.81	SQLSCVVVDDIER	2.18813	4.26008
vesicle-fusing ATPase	Nsf	31543349	1934.01	THPSVVPGCIAFSLPQR	3.09457	2.98329
vesicular integral-membrane protein VIP36 precursor	Lman2	34328278	1485.69	WSELAGCTADFR	1.78845	3.23232
vigilin	Hdlbp	672424499	1135.61	ICLEIMQR	1.53314	2.14619
vinculin	Vcl	31543942	1205.64	TNLLQVCER	2.0023	2.65403
vitamin K epoxide reductase complex subunit 1 isoform X1	Vkorc1	568950796	1555.77	ALCDVGTAISCSR	-	3.74429
voltage-dependent anion-selective channel protein 2	Vdac2	6755965	1975.83	SCSGVEFSTSGSSNTDTGK	1.80115	6.69904
voltage-dependent anion-selective channel protein 3 isoform 2	Vdac3	6755967	1403.71	VCNYGLTFTQK	2.288	3.57882
V-type proton ATPase 116 kDa subunit a isoform 1 isoform X8	Atp6v0a1	568971304	1620.78	ASLYPCPETPQER	2.02493	3.08877
V-type proton ATPase subunit B, brain isoform	Atp6v1b2	19705578	2251.21	IPIFSAAGLPHNEIAAQICR	2.11342	3.99386
WD repeat-containing protein 1 isoform X1	Wdr1	568934035	2274.02	MTVNESEQLVSCSMDDTVR	2.53722	4.76921
WD repeat-containing protein 11	Wdr11	227908800	1674.91	TGVPFLQVIPCSQR	1.45339	2.70897
WD40 repeat-containing protein SMU1	Smu1	227430367	1344.66	NPEHFVVCNR	1.72773	2.51881
zinc transporter 7	Slc30a7	12963579	1876.94	TPPSLENTLPQCYQR	1.40925	3.88052
					2.60563

## Sheet: Sulfhydrome HL>2
Summary of cysteine containing peptides identified in LC-MS/MS analysis.
Protein	Gene ID	Accessions	MH+ [Da]	Sequence	H/L	ratios	Xcorr
					Sequest	Manual
AP-2 complex subunit alpha-1 isoform X1	Ap2a1	568947209	1673.87	LLQCYPPPEDAAVK	0.121455	-	2.92143
DNA topoisomerase 1	Top1	112734855	1254.68	AVAILCNHQR	0.371507	0.4	2.71723
aspartate aminotransferase, mitochondrial	Got2	6754036	1048.56	VGAFTVVCK	2.00184	-	2.49482
vinculin	Vcl	31543942	1205.64	TNLLQVCER	2.0023	-	2.65403
60S ribosomal protein L27a-like	Gm8213	568893303	1490.7	NQSFCPTVNLDK	2.00351	-	2.94445
6-phosphofructokinase type C isoform X5	Pfkp	568981406	1892.95	LPLMECVQMTQDVQK	2.00351	-	4.55903
cation-dependent mannose-6-phosphate receptor precursor	M6pr	14916479	1122.59	AVVMISCNR	2.00424	1.9	2.26561
glutathione S-transferase Mu 5	Gstm5	6754086	1426.6	YICGEAPDYDR	2.00586	-	2.85194
26S protease regulatory subunit 8	Psmc5	7110703	1400.68	GVCTEAGMYALR	2.00875	-	2.76438
CAD protein isoform 2	Cad	575501556	2188.07	NSVTGGTAAFEPSLDYCVVK	2.01	-	4.99523
sarcoplasmic/endoplasmic reticulum calcium ATPase 3 isoform a	Atp2a3	254039658	1274.6	SMSVYCTPTR	2.01423	-	2.63772
sodium/potassium-transporting ATPase subunit alpha-1 precursor	Atp1a1	21450277	2536.25	IISANGCKVDNSSLTGESEPQTR	2.01663	-	4.3568
heat shock 70 kDa protein 4	Hspa4	112293266	1455.71	FLEMCDDLLAR	2.01673	-	2.93856
dynamin 1-like isoform X12	Dnm1l	568996397	1934.99	IIQHCSNYSTQELLR	2.0177	-	3.32137
60S ribosomal protein L23-like	LOC100044627	377837128	2038.07	ISLGLPVGAVINCADNTGAK	2.01889	-	4.46686
uncharacterized protein FLJ45252 homolog	LOC102637099	568943658	2154.02	LGEAALFSESGVCTEPEER	2.02078	-	5.10316
Golgi apparatus protein 1 precursor	Glg1	6677905	1774.79	QVSSECQGEMLDYR	2.02087	-	2.97011
Golgi-specific brefeldin A-resistance guanine nucleotide exchange factor 1 isoform X3	Gbf1	569006203	1177.62	FSCLLPDPR	2.0211	-	2.6048
serine/threonine-protein phosphatase PP1-beta catalytic	Ppp1cb	161484668	1114.58	HDLDLICR	2.02235	-	2.50369
V-type proton ATPase 116 kDa subunit a isoform 1 isoform X8	Atp6v0a1	568971304	1620.78	ASLYPCPETPQER	2.02493	-	3.08877
paternally-expressed gene 3 protein	Peg3	58331166	1656.79	MCEETFVPSQSLR	2.02502	-	3.75454
small glutamine-rich tetratricopeptide repeat-containing protein alpha isoform X1	Sgta	568968038	1824.91	AIELNPANAVYFCNR	2.02594	-	3.35169
transforming protein RhoA isoform X1	Rhoa	568962753	1406.66	IGAFGYMECSAK	2.02614	-	2.85414
microtubule-associated protein RP/EB family member 1	Mapre1	7106301	2343.14	NIELICQENEGENDPVLQR	2.02701	-	6.03837
cytochrome b-c1 complex subunit 1, mitochondrial precursor	Uqcrc1	46593021	1426.7	LCTSATESEVTR	2.02807	-	3.90843
sarcoplasmic/endoplasmic reticulum calcium ATPase 3 isoform a	Atp2a3	254039658	1478.65	KEDMHLDDCSR	2.03138	-	2.93998
guanine nucleotide-binding protein G(I)/G(S)/G(T) subunit beta-2 isoform X1	Gnb2	568938402	2005.01	ACGDSTLTQITAGLDPVGR	2.03218	-	4.4564
protein tyrosine phosphatase, receptor type, N isoform X2	Ptprn	568907586	2494.19	LAALGPEGAHGDTTFEYQDLCR	2.03273	-	5.3463
40S ribosomal protein S4, X isoform	Rps4x	6677805	1615.98	LRECLPLIIFLR	2.03347	-	3.73798
40S ribosomal protein S21 isoform X1	Rps21	568920401	1083.57	TYGICGAIR	2.03456	-	2.52029
clathrin heavy chain 1	Cltc	51491845	1915.98	YESLELCRPVLQQGR	2.03482	-	2.94288
sodium/potassium-transporting ATPase subunit alpha-1 precursor	Atp1a1	21450277	876.482	IAGLCNR	2.03538	-	2.06106
DNA replication licensing factor MCM2	Mcm2	172088119	2037.08	TSGVVTSCTGVLPQLSMVK	2.03557	-	5.11768
NADH dehydrogenase subunit 3	ND3	226453482	1744.77	ANPYECGFDPTSSAR	2.03879	-	3.90766
proteasome subunit beta type-2 isoform X1	Psmb2	568929154	934.487	NLADCLR	2.04019	-	2.25716
eukaryotic translation initiation factor 2 subunit 3-like	LOC102642679	568904743	1968.9	SCGSSTPDEFPTDIPGTK	2.04066	-	4.19252
endoplasmin precursor	Hsp90b1	6755863	2429.14	LTESPCALVASQYGWSGNMER	2.04238	-	6.12562
heat shock cognate 71 kDa protein	Hspa8	31981690	1017.59	VCNPIITK	2.04346	-	2.31629
aspartate aminotransferase, mitochondrial	Got2	6754036	1719.8	TCGFDFSGALEDISK	2.04352	-	3.17939
phosphoglycolate phosphatase	Pgp	40254507	2046.97	FIFDCVSQEYGINPER	2.04524	-	4.92954
40S ribosomal protein S4, X isoform	Rps4x	6677805	1346.8	ECLPLIIFLR	2.04593	-	2.87205
protein transport protein Sec31A isoform X16	Sec31a	568936184	2223.12	SAQLQHAVQSQGFIGYCQK	2.04712	-	3.43711
glycylpeptide N-tetradecanoyltransferase 2 isoform c	Nmt2	594150381	1476.74	AMELLSACQGPAR	2.04779	-	3.41541
eukaryotic translation initiation factor 3 subunit B	Eif3b	29789343	1992.97	FSHQGVQLIDFSPCER	2.04836	-	4.09161
superoxide dismutase [Cu-Zn]	Sod1	45597447	1074.61	LACGVIGIAQ	2.04934	-	2.65341
neuroendocrine convertase 2 precursor	Pcsk2	6679229	2240.03	TALYDESCSSTLASTFSNGR	2.05237	-	5.86609
fatty acid synthase	Fasn	93102409	1323.54	SFDDSGSGYCR	2.05251	-	3.01305
60S ribosomal protein L3-like, partial	Gm12816	568904602	1310.69	VACIGAWHPAR	2.05348	1.9	3.49042
UDP-glucose:glycoprotein glucosyltransferase 1 isoform X1	Uggt1	568906530	2167.95	DFNLDGAPYGYTPFCDSR	2.05593	-	4.77457
dehydrogenase/reductase SDR family member 13 precursor	Dhrs13	117647267	1822.87	YFANCHVEEVSPAAR	2.05602	-	3.13456
heterogeneous nuclear ribonucleoprotein H2 isoform X1	Hnrnph2	569011433	1594.75	GLPWSCSAEEVMR	2.05737	-	3.13121
mannose-1-phosphate guanyltransferase alpha isoform X7	Gmppa	568907775	1299.79	LLPAITILGCR	2.05804	-	2.62379
host cell factor 1	Hcfc1	34328130	990.525	VAGINACGR	2.05972	-	2.42007
DNA replication licensing factor MCM6	Mcm6	6678832	1667.92	LVFLACHVAPTNPR	2.05998	-	3.19257
coatomer subunit beta'	Copb2	29789080	2290.05	DMGSCEIYPQTIQHNPNGR	2.06054	-	2.69026
elongation factor 2	Eef2	33859482	1191.6	STLTDSLVCK	2.06223	-	2.86703
60S ribosomal protein L4	Rpl4	30794450	1834.96	RGPCIIYNEDNGIIK	2.06265	-	3.83999
annexin A4 isoform X1	Anxa4	568940372	1734.88	GAGTDEGCLIEILASR	2.06605	-	4.59592
pyrroline-5-carboxylate reductase 1, mitochondrial isoform X1	Pycr1	568972717	1244.62	CMTNTPVVVR	2.06639	-	3.30303
chromodomain helicase DNA binding protein 5 isoform X7	Chd5	568931388	2071.96	HLCEPGADGAETFADGVPR	2.06784	-	3.47541
60S ribosomal protein L14	Rpl14	13385472	1061.55	ALVDGPCTR	2.07048	-	2.15528
40S ribosomal protein SA-like	LOC102642689	568903782	1374.68	YVDIAIPCNNK	2.07259	-	3.51844
heterogeneous nuclear ribonucleoprotein L isoform X4	Hnrnpl	568944898	1194.57	LCFSTAQHAS	2.07338	-	2.12767
transitional endoplasmic reticulum ATPase	Vcp	225543319	1867.84	MTNGFSGADLTEICQR	2.07389	-	4.28683
T-complex protein 1 subunit gamma	Cct3	6753320	1501.81	IPGGIIEDSCVLR	2.07389	-	3.27037
14-3-3 protein theta	Ywhaq	6756039	1341.62	YLAEVACGDDR	2.0741	-	3.87835
60S acidic ribosomal protein P0	Rplp0	6671569	2253.17	AGAIAPCEVTVPAQNTGLGPEK	2.08048	-	4.16749
annexin A5 isoform X1	Anxa5	568920727	1243.59	ALLLLCGGEDD	2.08091	-	2.90242
calreticulin precursor	Calr	6680836	2514.09	DMHGDSEYNIMFGPDICGPGTK	2.08165	-	5.00003
heat shock protein HSP 90-beta	Hsp90ab1	40556608	883.444	FENLCK	2.0817	-	2.11154
ADP-ribosylarginine hydrolase	Adprh	6680658	893.479	AMCIGLR	2.08293	-	2.3013
CLIP-associating protein 2 isoform X9	Clasp2	568964400	1416.75	IPRPSVSQGCSR	2.08486	-	3.0975
pre-mRNA-processing factor 19 isoform 3	Prpf19	359718922	1871.89	QELSHALYQHDAACR	2.08502	-	4.12586
RNA polymerase II subunit A C-terminal domain phosphatase SSU	Ssu72	172088095	1306.67	VAVVCSSNQNR	2.08547	-	2.27034
serine--tRNA ligase, cytoplasmic isoform 2	Sars	326381098	1625.83	TICAILENYQAEK	2.08565	-	4.09634
ADP/ATP translocase 2	Slc25a5	22094075	934.512	GLGDCLVK	2.08632	-	2.72145
N(4)-(beta-N-acetylglucosaminyl)-L-asparaginase isoform 2 precursor	Aga	326439050	1205.52	NCQPNYWR	2.08743	-	2.05281
26S protease regulatory subunit 8	Psmc5	7110703	1503.74	NIDINDVTPNCR	2.09082	-	3.69807
solute carrier family 22 member 16	Slc22a16	110625794	1786.88	NFNLVCDQKWYAR	2.09666	-	2.58271
heterogeneous nuclear ribonucleoprotein U-like 2 isoform X1	Hnrnpul2	569007769	1900.91	NFILDQCNVYNSGQR	2.09681	-	4.98359
nuclear pore complex protein Nup93 isoform X2	Nup93	568957583	1024.57	AVYCIIGR	2.10398	-	2.49558
malate dehydrogenase, mitochondrial precursor	Mdh2	31982186	1443.84	TIIPLISQCTPK	2.10679	-	2.14356
ADP-ribosylation factor 4	Arf4	6680720	1711.82	NICFTVWDVGGQDK	2.10772	-	3.23504
heterogeneous nuclear ribonucleoprotein H2 isoform X1	Hnrnph2	569011433	2172.93	YGDGGSSFQSTTGHCVHMoR	2.11046	-	2.82318
A-kinase anchor protein SPHKAP	Sphkap	170014712	1395.7	TQTLCTESVQR	2.11274	-	2.58288
V-type proton ATPase subunit B, brain isoform	Atp6v1b2	19705578	2251.21	IPIFSAAGLPHNEIAAQICR	2.11342	-	3.99386
sodium/potassium-transporting ATPase subunit alpha-1 precursor	Atp1a1	21450277	1155.63	LIIVEGCQR	2.11637	-	2.59798
inosine-5'-monophosphate dehydrogenase 2	Impdh2	31981382	1503.75	HGFCGIPITDTGR	2.11716	-	3.11205
serine/threonine-protein kinase VRK1 isoform X11	Vrk1	568979546	2653.18	SVESQGAIHGSMSQPAAGCSSSDSSR	2.11759	-	5.99869
26S protease regulatory subunit 10B	Psmc6	27754103	1441.71	NVCTEAGMFAIR	2.11763	-	3.28893
protein canopy homolog 4 precursor	Cnpy4	30519939	1426.76	HVLPASETACLR	2.11925	-	2.37286
transducin (beta)-like 2 isoform X2	Tbl2	568938123	1386.69	FVGSCGFTPDVK	2.1217	-	3.02832
isocitrate dehydrogenase [NADP], mitochondrial precursor	Idh2	225579033	1171.57	SSGGFVWACK	2.12171	-	2.59963
ATP-dependent RNA helicase A isoform X1	Dhx9	568908101	1425.72	AAECNIVVTQPR	2.12514	-	3.60505
poly(rC)-binding protein 1	Pcbp1	6754994	2548.25	VMTIPYQPMPASSPVICAGGQDR	2.12661	-	5.58151
chromobox protein homolog 3-like	Gm6901	82950919	1545.67	LTWHSCPEDEAQ	2.12685	-	3.40281
pyruvate carboxylase, mitochondrial isoform X2	Pcx	569005643	1481.69	ADFAQACQDAGVR	2.12749	-	4.7223
heterogeneous nuclear ribonucleoproteins A2/B1-like isoform X2	LOC102642938	568904641	1066.55	LTDCVVMR	2.128	-	2.68131
alpha-enolase isoform X3	Eno1	568930542	1706.89	VNQIGSVTESIQACK	2.12828	-	4.61888
cytosol aminopeptidase	Lap3	255069715	1268.65	SAGACTAAAFLR	2.12915	-	3.40879
probable ATP-dependent RNA helicase DDX5 isoform X1	Ddx5	568971472	1860.9	ELAQQVQQVAAEYCR	2.12943	-	4.53798
eukaryotic translation initiation factor 4E isoform X2	Eif4e	568921782	1460.69	IAIWTTECENR	2.12991	-	2.93438
rRNA 2'-O-methyltransferase fibrillarin-like	LOC102643269	568889938	1085.53	HEGVFICR	2.13006	-	2.35794
ADP-dependent glucokinase isoform X1	Adpgk	568962117	1780.86	VAGTQACATETIDTNR	2.13216	-	5.2508
elongation factor 1-alpha 1	Eef1a1	126032329	3068.47	SGDAAIVDMVPGKPMCVESFSDYPPLGR	2.1432	-	4.10192
cofilin-1	Cfl1	6680924	1863.87	HELQANCYEEVKDR	2.14368	-	5.80739
mitochondrial glutamate carrier 1 isoform X1	Slc25a22	568952448	1771.76	GVNEDTYSGFLDCAR	2.14483	-	3.68906
glycerol-3-phosphate dehydrogenase, mitochondrial precursor	Gpd2	224922803	1488.69	EYACTAVDMISR	2.14631	-	3.12131
probable ATP-dependent RNA helicase DDX17 isoform X1	Ddx17	568993105	2345.04	TTSSANNPNLMYQDECDRR	2.14703	-	2.55359
sarcoplasmic/endoplasmic reticulum calcium ATPase 3 isoform a	Atp2a3	254039658	1508.69	MFVVAEAEAGTCR	2.14877	-	4.14958
DNA-directed RNA polymerase II subunit RPB2	Polr2b	226958589	1485.75	STYCLLNGLTDR	2.15192	-	3.23869
fructose-bisphosphate aldolase A isoform X2	Aldoa	568949350	1200.61	ALANSLACQGK	2.15349	-	3.6341
ubiquitin-like modifier-activating enzyme 1 isoform 2	Uba1	209862989	1064.5	VGEFCHSR	2.1552	-	2.83329
phosphoglycolate phosphatase	Pgp	40254507	2110.02	YLQQPDCLLVGTNMDNR	2.15628	-	4.85683
fructose-bisphosphate aldolase A isoform X2	Aldoa	568949350	3093.57	YASICQQNGIVPIVEPEILPDGDHDLK	2.15637	-	5.1198
isocitrate dehydrogenase [NAD] subunit alpha, mitochondrial precursor	Idh3a	18250284	1196.65	IEAACFATIK	2.15714	-	2.28096
cystathionine beta-synthase isoform 2	Cbs	30089694	1225.67	CVVILPDSVR	2.16221	-	2.77006
pyruvate kinase PKM isoform M1	Pkm	359807367	1432.77	NTGIICTIGPASR	2.16478	-	4.42772
heterogeneous nuclear ribonucleoprotein K isoform 4	Hnrnpk	672424492	1171.52	GSDFDCELR	2.16656	-	2.73251
40S ribosomal protein S4, X isoform	Rps4x	6677805	1855.89	FDTGNLCMVTGGANLGR	2.16845	-	5.23155
4-aminobutyrate aminotransferase, mitochondrial isoform 2 precursor	Abat	283483966	1688.77	GTFCSFDTPDEAIR	2.17666	-	3.63446
neurocalcin-delta isoform X1	Ncald	568990538	1395.67	LLQCDPSSAGQF	2.18437	-	2.1278
transmembrane 9 superfamily member 3 precursor	Tm9sf3	19111162	1357.64	NLSGQPNFPCR	2.18442	-	2.62479
elongation factor G, mitochondrial	Gfm1	170650599	1866.9	YQPCSPSTQEELINK	2.18468	-	2.26958
lon protease homolog, mitochondrial precursor	Lonp1	116089322	1486.82	AGVTCIILPAENR	2.18633	-	3.08383
vesicle-fusing ATPase	Nsf	31543349	1592.81	SQLSCVVVDDIER	2.18813	-	4.26008
importin-4 isoform X2	Ipo4	568989000	1329.71	TCGSLALQPPGR	2.18861	-	2.2718
general vesicular transport factor p115	Uso1	23956096	1471.73	LQTENCELLQR	2.18891	-	3.46321
elongation factor 2	Eef2	33859482	1281.57	EGALCEENMR	2.18916	-	2.25392
ADP/ATP translocase 2	Slc25a5	22094075	1761.81	GTDIMYTGTLDCWR	2.19219	-	4.33848
filamin-B isoform X2	Flnb	568985493	1512.75	ACIPQSFTVDSSK	2.19301	-	2.52672
SEC16 homolog A isoform X6	Sec16a	568913426	1159.62	FTVPHVCAR	2.19824	-	2.33022
ATP-dependent 6-phosphofructokinase, liver type	Pfkl	31560653	1662.88	VFANAPDSACVIGLR	2.19832	-	3.77153
60S ribosomal protein L4	Rpl4	30794450	1673.83	GPCIIYNEDNGIIK	2.20332	-	3.92413
vacuolar protein sorting-associated protein 35	Vps35	13928670	1140.59	NYLLQCTR	2.20481	-	2.5145
F-box only protein 2 isoform X1	Fbxo2	568931131	1742.96	VLAELPATELVQACR	2.21	-	4.01093
6-phosphogluconolactonase isoform 1	Pgls	13384778	1256.58	WTLGFCDER	2.21038	-	2.73644
MICOS complex subunit Mic19	Chchd3	21313618	1696.81	YEYHPVCADLQTK	2.21312	-	2.70773
ribonuclease inhibitor isoform a	Rnh1	31981748	1250.61	LDDCGLTEVR	2.21393	-	3.55939
arginine--tRNA ligase, cytoplasmic	Rars	262118273	1341.69	AAQTSVAYGCIK	2.21571	-	3.44276
elongation factor 2	Eef2	33859482	1512.75	DLEEDHACIPIK	2.21804	-	2.63206
60S ribosomal protein L9-like	LOC101056029	568900450	1308.67	TGVACSVSQAQK	2.22351	-	3.19739
membrane-associated progesterone receptor component 2	Pgrmc2	226442772	1899.94	GLCSGPGAGEESPAATLPR	2.22366	-	4.93782
exosome complex component RRP40	Exosc3	39930417	2317.22	NRPNVQVGDLIYGQCVVANK	2.22369	-	3.32289
transcription elongation factor SPT5 isoform X2	Supt5	568945195	1717.87	VELHSTCQTISVDR	2.22522	-	3.52326
transcriptional repressor NF-X1 isoform 3	Nfx1	594190892	2507.12	SEDENTRPVAISHTDSSDASCR	2.2312	-	3.75762
serine/threonine-protein phosphatase 5	Ppp5c	199559777	1367.67	GVSCQFGPDVTK	2.23273	-	2.99059
major vault protein	Mvp	239052674	1388.72	HYCIVANPVSR	2.23704	-	2.67154
dolichyl-diphosphooligosaccharide--protein glycosyltransferase 48 kDa subunit precursor	Ddost	46195798	1714.76	ELGSECGIEFDEEK	2.23921	-	4.29456
isocitrate dehydrogenase [NAD] subunit gamma 1, mitochondrial isoform X2	Idh3g	569009753	2727.25	HACVPVDFEEVHVSSNADEEDIR	2.2419	-	5.79457
bifunctional glutamate/proline--tRNA ligase isoform X2	Eprs	568911610	1261.66	LNQWCNVVR	2.24462	-	2.12698
glycerol-3-phosphate dehydrogenase, mitochondrial precursor	Gpd2	224922803	1639.82	CKDVLTGQEFDVR	2.24702	-	3.3599
pyrroline-5-carboxylate reductase 3 isoform X1	Pycrl	568993033	1411.68	AATMSAVEAATCR	2.25023	-	4.05081
coatomer subunit epsilon	Cope	10946972	2135.01	NAFYIGSYQQCINEAQR	2.25152	-	5.38269
myosin light polypeptide 6	Myl6	33620739	1414.69	ILYSQCGDVMR	2.25388	-	2.89455
predicted gene 5803	Gm5803	260304980	2038.96	SHFEQWGTLTDCVVMR	2.25479	-	4.43083
protein RCC2 isoform X1	Rcc2	568930420	1361.65	IEYDCELVPR	2.25768	-	3.25403
CTP synthase 1 isoform X1	Ctps	568929379	1358.76	GLGLSPDLVVCR	2.25957	-	3.1526
ATP-citrate synthase isoform 2	Acly	29293809	1228.6	VDATADYICK	2.265	-	3.39161
prelamin-A/C isoform X1	Lmna	568921945	1409.67	AQNTWGCGSSLR	2.26651	-	2.87567
basigin isoform 2 precursor	Bsg	116014342	1783.88	SGEYSCIFLPEPVGR	2.26944	-	4.1713
serine/threonine-protein phosphatase 2A 65 kDa regulatory subunit A alpha isoform	Ppp2r1a	8394027	1380.64	NLCSDDTPMVR	2.27218	-	2.76376
dehydrogenase/reductase SDR family member 1 isoform X1	Dhrs1	568988186	1228.62	LAADCAHELR	2.27284	-	3.03131
adenylyl cyclase-associated protein 1 isoform X1	Cap1	568928280	1308.66	NSLDCEIVSAK	2.27564	-	3.03822
kinesin heavy chain isoform 5C	Kif5c	45433560	1305.67	ILQDSLGGNCR	2.27663	-	3.49477
14-3-3 protein zeta/delta-like, partial	LOC102641764	568902620	1177.48	YDDMAACMK	2.2791	-	3.1644
clathrin heavy chain 1	Cltc	51491845	1586.78	HSSLAGCQIINYR	2.28457	-	3.92865
40S ribosomal protein S12-like	Rps12l2	149258592	1134.61	LGEWVGLCK	2.28529	-	2.81805
voltage-dependent anion-selective channel protein 3 isoform 2	Vdac3	6755967	1403.71	VCNYGLTFTQK	2.288	-	3.57882
glucosidase 2 subunit beta isoform 2 precursor	Prkcsh	652697818	1625.73	YEQGTGCWQGPNR	2.28902	-	3.8913
cathepsin L1 isoform X1	Ctsl	568983003	1761.83	DNHCGLATAASYPVVN	2.28928	-	3.38677
cytochrome b-c1 complex subunit 1, mitochondrial precursor	Uqcrc1	46593021	1673.79	VYEEDAVPGLTPCR	2.28969	-	3.81184
microtubule-associated protein 4 isoform X8	Map4	568963505	1747.81	ETPGSQPSEPCSGVSR	2.28996	-	2.24266
guanine nucleotide-binding protein G(k) subunit alpha	Gnai3	33563256	1169.55	DGGVQACFSR	2.29652	-	3.16623
valine--tRNA ligase	Vars	255069795	1227.66	ICLQPPPSSR	2.29666	-	2.1838
succinate dehydrogenase [ubiquinone] iron-sulfur subunit, mitochondrial isoform X1	Sdhb	568931796	1289.71	CGPMVLDALIK	2.29863	-	2.35209
acyl-CoA dehydrogenase family member 9, mitochondrial	Acad9	100817933	1288.66	AYICAHPLDR	2.29895	-	2.12105
asparagine--tRNA ligase, cytoplasmic isoform 2	Nars	219275596	1709.82	YGTCPHGGYGLGLER	2.30651	-	4.08992
40S ribosomal protein S29	Rps29	6677803	986.465	YGLNMCR	2.31469	-	2.27566
6-phosphogluconate dehydrogenase, decarboxylating isoform X1	Pgd	568930427	1410.62	SAVDNCQDSWR	2.32888	-	3.20358
non-lysosomal glucosylceramidase	Gba2	240120073	1859.82	DSQVYCEDTGGTEAVR	2.33232	-	5.04755
ras-related protein Rab-3A isoform X2	Rab3a	568955316	1048.58	LVDVICEK	2.34077	-	2.48132
26S protease regulatory subunit 8	Psmc5	7110703	1495.72	AVAHHTDCTFIR	2.34704	-	2.87878
TBC1 domain family member 15	Tbc1d15	255958202	1705.79	DDSPTQTLASPNACR	2.34784		4.45113
sodium/potassium-transporting ATPase subunit alpha-1 precursor	Atp1a1	21450277	1754.82	NIAFFSTNCVEGTAR	2.35305	2.1	4.25427
heterogeneous nuclear ribonucleoprotein F isoform X1	Hnrnpf	568943326	1689.75	DLSYCLSGMYDHR	2.35406	-	3.34832
peptidyl-prolyl cis-trans isomerase FKBP4	Fkbp4	6753882	1176.63	TQLAVCQQR	2.35493	-	2.77558
casein kinase II subunit beta isoform X2	Csnk2b	568998843	1463.65	YQQGDFGYCPR	2.35569	-	3.37292
annexin A6 isoform b	Anxa6	158966670	1091.55	ALLALCGGED	2.35793	-	2.2174
coronin-1C	Coro1c	31542413	1611.77	VTWDSSFCAVNPR	2.35957	-	3.04025
eukaryotic translation initiation factor 3 subunit M	Eif3m	21703762	1296.7	LLYEALVDCK	2.35997	-	2.69567
T-complex protein 1 subunit gamma	Cct3	6753320	919.55	ACTILLR	2.36349	-	2.06187
platelet-activating factor acetylhydrolase IB subunit alpha	Pafah1b1	7305363	2430.16	MVRPNQDGTLIASCSNDQTVR	2.36416	-	5.10213
proliferation-associated protein 2G4	Pa2g4	6755100	1925	SLVEASSSGVSVLSLCEK	2.3691	-	5.33327
leucine-rich alpha-2-glycoprotein precursor	Lrg1	16418335	934.487	NLADLCR	2.37648	-	2.074
glyceraldehyde-3-phosphate dehydrogenase-like isoform 2	Gm20899	149273202	1629.87	VPTPNVSVVDLTCR	2.37978	-	4.03197
protein TSSC1 isoform X2	Tssc1	568977817	1133.6	VQACAAVWR	2.38149	-	2.17474
CUGBP Elav-like family member 2 isoform 7	Celf2	237757269	1672.79	VMFSPFGQIEECR	2.38725	-	3.31202
small nuclear ribonucleoprotein Sm D2-like	Gm5848	568889928	1304.68	NNTQVLINCR	2.39141	-	3.70024
protein lin-7 homolog C	Lin7c	6755973	1395.72	VLQSEFCNAVR	2.39141	-	3.52371
heat shock 70 kDa protein 4	Hspa4	112293266	1721.88	SVMDATQIAGLNCLR	2.39646	-	4.96799
hypoxia up-regulated protein 1 isoform X4	Hyou1	568958751	1715.81	VEFEELCADLFDR	2.40197	-	4.11252
ubiquitin carboxyl-terminal hydrolase isozyme L1	Uchl1	188219614	968.533	FSAVALCK	2.40419	-	2.81581
DNA replication licensing factor MCM2	Mcm2	172088119	1080.6	FDVLCVVR	2.40577	-	2.99923
heat shock protein 75 kDa, mitochondrial isoform X1	Trap1	568996112	1356.68	NIYYLCAPNR	2.4081	-	2.59257
poly(U)-binding-splicing factor PUF60 isoform c	Puf60	257196186	907.495	ALAIMCR	2.40896	2.2	2.31473
developmentally-regulated GTP-binding protein 2 isoform X1	Drg2	568971509	1522.75	VYMPCLYVYNK	2.42066	-	2.51874
cathepsin B preproprotein	Ctsb	6681079	1661.82	EQWSNCPTIGQIR	2.43805	-	3.95163
Golgi apparatus protein 1 precursor	Glg1	6677905	1295.6	LSSDCEDQIR	2.43848	-	2.65973
serine/threonine-protein phosphatase 5	Ppp5c	199559777	1549.71	TECYGYALGDATR	2.44213	-	4.55484
monofunctional C1-tetrahydrofolate synthase, mitochondrial	Mthfd1l	283135114	1800.89	YTQQGFGNLPICMAK	2.4448	-	4.16134
delta-1-pyrroline-5-carboxylate synthase isoform 2	Aldh18a1	255958294	1120.55	GDECGLALGR	2.44553	-	3.19306
methionine--tRNA ligase, cytoplasmic isoform X1	Mars	568967394	1729.96	ILATSFICTLPAGHR	2.44663	-	2.9203
T-complex protein 1 subunit alpha isoform 2	Tcp1	595582154	1547.61	GANDFMCDEMER	2.44795	-	3.63934
cation-independent mannose-6-phosphate receptor precursor	Igf2r	133778978	1578.81	TGATEHYLINVCK	2.44994	-	3.21519
E3 ubiquitin-protein ligase UBR4	Ubr4	237820660	1579.74	HNTYLQECTGQR	2.45209	-	3.38094
hypoxanthine-guanine phosphoribosyltransferase	Hprt	96975138	1544.79	DLNHVCVISETGK	2.45438	-	3.44958
TBC1 domain family member 15	Tbc1d15	255958202	1525.74	YVVLCESPQDSR	2.45556	-	3.26758
heterogeneous nuclear ribonucleoprotein F isoform X1	Hnrnpf	568943326	2285.02	YGDSEFTVQSTTGHCVHMR	2.4596	-	4.24373
T-complex protein 1 subunit theta	Cct8	126723461	1904.93	IAVYSCPFDGMITETK	2.47259	-	3.96496
6-phosphogluconolactonase isoform 1	Pgls	13384778	1653.82	TGALCWFLDEAAAR	2.47561	-	3.75789
eukaryotic translation initiation factor 2 subunit 3-like	LOC102642679	568904743	1795.86	SFDVNKPGCEVDDLK	2.47678	-	2.29814
hydroxymethylglutaryl-CoA synthase, cytoplasmic	Hmgcs1	612339316	1280.62	HSLSYDCIGR	2.49036	-	2.37961
60S ribosomal protein L7a	Rpl7a	7305443	1773.84	TCTTVAFTQVNSEDK	2.49276	-	4.11762
aminopeptidase B isoform 1	Rnpep	227499103	1472.74	AFFPCFDTPAVK	2.49391	-	2.10768
serine/threonine-protein phosphatase 2A catalytic subunit beta isoform isoform X1	Ppp2cb	568953915	1751.85	CGNQAAIMELDDTLK	2.50617	-	3.6942
myosin-9	Myh9	114326446	1624.76	EDQSILCTGESGAGK	2.51216	-	4.00316
galectin-3-binding protein isoform X1	Lgals3bp	568972236	1248.62	VDAECMPVVR	2.51489	-	2.75191
DNA replication licensing factor MCM3	Mcm3	33859484	2125.01	NREEPFSSEEIQACLSR	2.51723	-	4.19027
cytoplasmic dynein 1 heavy chain 1	Dync1h1	134288917	1701.85	IQFVGACNPPTDPGR	2.52251	-	4.18671
60S ribosomal protein L4	Rpl4	30794450	1257.56	SGQGAFGNMCR	2.52527	-	2.82326
FACT complex subunit SPT16	Supt16	154350222	1427.72	INFYCPGSALGR	2.52982	-	2.63036
alpha-soluble NSF attachment protein isoform X2	Napa	568944692	1490.72	ADPQEAINCLMR	2.53345	-	3.12962
WD repeat-containing protein 1 isoform X1	Wdr1	568934035	2274.02	MTVNESEQLVSCSMDDTVR	2.53722	-	4.76921
guanine nucleotide-binding protein subunit beta-2-like 1	Gnb2l1	6680047	2054.94	YTVQDESHSEWVSCVR	2.53936	2.4	3.52878
4-trimethylaminobutyraldehyde dehydrogenase precursor	Aldh9a1	115334671	1250.61	VIATFACSGEK	2.54153	-	2.1061
coatomer subunit delta	Arcn1	148747410	1631.86	NTLEWCLPVIDAK	2.54185	-	3.30952
protein canopy homolog 2 isoform X2	Cnpy2	568968091	1873.91	SEAHLTELLEEVCDR	2.55093	-	2.47099
40S ribosomal protein S8	Rps8	6677813	1523.8	NCIVLIDSTPYR	2.55311	-	3.86609
sodium/potassium-transporting ATPase subunit alpha-1 precursor	Atp1a1	21450277	1584.9	ILDRCSSILLHGK	2.56296	-	2.84346
ER membrane protein complex subunit 8	Emc8	6754870	2392.1	FTMDCAAPTIHVYEQHENR	2.56731	-	3.60947
neuronal migration protein doublecortin isoform c	Dcx	46575788	1829.74	YAQDDFSLDENECR	2.56739	-	4.66845
60S ribosomal protein L5 isoform X1	Rpl5	568935106	1295.69	DIICQIAYAR	2.57265	-	2.86488
mitochondrial-processing peptidase subunit beta precursor	Pmpcb	95113671	1452.71	LCTDVTESEVAR	2.57811	-	3.65593
sodium/potassium-transporting ATPase subunit beta-1	Atp1b1	6753138	1562.81	YNPNVLPVQCTGK	2.58068	-	2.33012
40S ribosomal protein S3	Rps3	6755372	1067.59	RACYGVLR	2.59128	-	2.04031
pyruvate kinase PKM isoform M1	Pkm	359807367	2567.21	AEGSDVANAVLDGADCIMLSGETAK	2.59239	-	5.4418
heterogeneous nuclear ribonucleoprotein M isoform b	Hnrnpm	158186704	982.513	GCAVVEFK	2.61	-	2.05811
bifunctional glutamate/proline--tRNA ligase isoform X2	Eprs	568911610	1090.58	VACQGEVVR	2.61839	-	3.11406
DNA replication licensing factor MCM6	Mcm6	6678832	1088.53	LGFAEYCR	2.62036	-	2.67338
clathrin heavy chain 1	Cltc	51491845	1475.74	CNEPAVWSQLAK	2.64158	-	3.37046
suppressor of G2 allele of SKP1 homolog	Sugt1	23956176	1943.87	ALEQNPDDAQYYCQR	2.64715	-	5.11238
protein RCC2 isoform X1	Rcc2	568930420	984.504	YGCLSGVR	2.64883	-	2.28786
T-complex protein 1 subunit gamma	Cct3	6753320	1307.63	NLQDAMQVCR	2.66209	-	3.58392
coatomer subunit alpha	Copa	226823359	1109.51	AWEVDTCR	2.66724	-	2.02824
filamin-B isoform X2	Flnb	568985493	1695.79	VDIQTEDLEDGTCK	2.67839	-	3.89198
pyrroline-5-carboxylate reductase 1, mitochondrial isoform X1	Pycr1	568972717	1513.81	SLLINAVEASCIR	2.68158	2.6	4.26601
tyrosine 3-monooxygenase isoform X1	Th	568952746	1287.66	VFQCTQYIR	2.71728	-	2.30214
alpha-soluble NSF attachment protein isoform X2	Napa	568944692	1326.65	IEEACEIYAR	2.72841	-	3.07797
constitutive coactivator of PPAR-gamma-like protein 2	Fam120c	126723307	1571.8	SDPLPAPSQCALSR	2.72883	-	2.33394
pyruvate dehydrogenase E1 component subunit alpha, somatic form, mitochondrial	Pdha1	6679261	1245.6	VDGMDILCVR	2.75787	-	2.83825
filamin-B isoform X2	Flnb	568985493	1730.73	IEYDDQNDGSCDVK	2.76137	-	4.45612
ubiquitin carboxyl-terminal hydrolase isozyme L1	Uchl1	188219614	2056.96	NEAIQAAHDSVAQEGQCR	2.76576	-	5.65619
serine--tRNA ligase, cytoplasmic isoform 2	Sars	326381098	1079.54	IWGDCTVR	2.79051	-	2.52766
asparagine--tRNA ligase, cytoplasmic isoform 2	Nars	219275596	1405.71	LEDLVCDVVDR	2.79641	-	3.12268
cytochrome b-c1 complex subunit 6, mitochondrial	Uqcrh	21539599	1277.64	ERLELCDNR	2.80246	-	2.32781
transducin (beta)-like 2 isoform X2	Tbl2	568938123	1300.58	FEEASTMPCR	2.80468	-	2.16955
inorganic pyrophosphatase	Ppa1	27754065	1730.82	GISCMNTTVSESPFK	2.80702	-	4.64837
cysteine--tRNA ligase, cytoplasmic isoform 2	Cars	357588502	1782.87	VQPQWSPPAGTEPCR	2.81178	-	2.19497
major prion protein precursor	Prnp	13173473	1585.78	VVEQMCVTQYQK	2.84393	-	3.71861
eukaryotic translation initiation factor 3 subunit D isoform X1	Eif3d	568992908	2383.15	NLAMEATYINHNFSQQCLR	2.85682	-	3.75435
cysteine--tRNA ligase, cytoplasmic isoform 2	Cars	357588502	1687.82	TAVHEALCDNIDTR	2.86128	-	3.27846
eukaryotic translation initiation factor 3 subunit B	Eif3b	29789343	1328.6	YWLEEAECR	2.86316	-	2.60449
26S proteasome non-ATPase regulatory subunit 2	Psmd2	19882201	1546.85	SGALLACGIVNSGVR	2.86427	-	4.46995
methylthioribulose-1-phosphate dehydratase	Apip	258613873	2036.95	MAHAMNEYPDSCAVLVR	2.86995	-	3.05229
60S ribosomal protein L23-like	LOC100044627	377837128	1119.54	ECADLWPR	2.8975	-	2.04001
platelet-activating factor acetylhydrolase IB subunit gamma	Pafah1b3	6679201	1038.55	LGYTPVCR	2.91987	-	2.48366
tumor suppressor p53-binding protein 1 isoform X7	Trp53bp1	568917333	1577.75	ADVSCEPLEEVEK	2.9239	-	3.84243
AP-2 complex subunit alpha-2	Ap2a2	163644277	1598.85	LLQCYPPPDPAVR	2.94335	-	2.65062
aspartate aminotransferase, mitochondrial	Got2	6754036	1569.81	EYLPIGGLAEFCK	2.98843	-	3.34572
protein RCC2 isoform X1	Rcc2	568930420	1896.05	LIEALSHEAIVLAACGR	2.98987	-	2.95291
60 kDa heat shock protein, mitochondrial isoform X1	Hspd1	568905803	1757.97	AAVEEGIVLGGGCALLR	3.0342	-	4.6429
lanosterol synthase isoform X3	Lss	568966805	1425.69	ETLNQGLDFCR	3.0347	3.8	2.2399
dihydropyrimidinase-related protein 2	Dpysl2	40254595	2143.97	THNSALEYNIFEGMECR	3.04775	-	4.10882
glutaminyl-tRNA synthetase isoform 2	Qars	269954679	1137.59	ANNGICFLR	3.08527	-	2.19583
vesicle-fusing ATPase	Nsf	31543349	1934.01	THPSVVPGCIAFSLPQR	3.09457	-	2.98329
UPF0577 protein KIAA1324 isoform X3	5330417C22Rik	568922653	1947.05	VAVPHSPGLCTSLPDPVK	3.11831	-	4.69251
40S ribosomal protein S3	Rps3	6755372	1356.7	GLCAIAQAESLR	3.17001	-	3.76399
leucine-rich PPR motif-containing protein, mitochondrial precursor	Lrpprc	134031976	1599.81	SCGSLLPELSLAER	3.23699	-	3.68669
importin-4 isoform X2	Ipo4	568989000	1062.55	DNICGALAR	3.28968	-	2.44557
DENN domain-containing protein 4C	Dennd4c	300863147	1764.89	LMPGCEVIQATPYGR	3.35805	-	2.59599
isoamyl acetate-hydrolyzing esterase 1 homolog isoform X3	Iah1	568977938	1937.01	LNSVVGEYANACLQVAR	3.39076	4.1	4.70984
mitochondrial 10-formyltetrahydrofolate dehydrogenase isoform X3	Aldh1l2	568967267	1955.93	SCDVKPNDTVDSLYNR	3.43809	-	3.31023
bifunctional glutamate/proline--tRNA ligase isoform X2	Eprs	568911610	1039.55	SCQFVAVR	3.45679	-	2.89429
importin subunit beta-1	Kpnb1	88014720	1740.9	ESCLEAYTGIVQGLK	3.49295	-	4.23252
protein TSSC1 isoform X2	Tssc1	568977817	2079.02	SMSQIYCIENAHGQLVR	3.50062	-	2.92538
ADP/ATP translocase 1	Slc25a4	148747424	1731.79	GADIMYTGTLDCWR	3.52257	-	3.73481
protein Niban	Fam129a	241982745	2248.06	IHPEASHPAAIQQDSCEER	3.54852	-	3.63255
triosephosphate isomerase	Tpi1	226958349	1205.6	IAVAAQNCYK	3.55329	-	3.30285
heat shock 70 kDa protein 4L isoform X2	Hspa4l	568921291	1579.84	AQFEQLCASLLAR	3.57203	-	3.93471
probable ubiquitin carboxyl-terminal hydrolase FAF-X isoform X8	Usp9x	569008690	1462.74	VVIQSNDDIACR	3.6122	-	3.33856
lupus La protein homolog isoform X1	Ssb	568916096	1386.61	FSGDLDDQTCR	3.6774	-	3.53686
asparagine--tRNA ligase, cytoplasmic isoform 2	Nars	219275596	1756.9	LMTDTINEPILLCR	3.84095	-	4.53602
asparagine--tRNA ligase, cytoplasmic isoform 2	Nars	219275596	1564.82	YHIRDVCLYPR	3.95808	-	3.06578
nuclear pore membrane glycoprotein 210 isoform X1	Nup210	568942448	1491.73	SSNLLGECSPAQR	3.98759	3.2	3.20056
5'-AMP-activated protein kinase catalytic subunit alpha-1 isoform X1	Prkaa1	568990171	1735.83	SQSRPNDIMAEVCR	4.01775	-	3.5727
isoamyl acetate-hydrolyzing esterase 1 homolog isoform X3	Iah1	568977938	1910.06	VILITPPPLCEAAWEK	4.02332	-	2.63895
factor, arginine/serine-rich 2, interacting protein isoform X2	Scaf11	568993406	1650.68	MESCEGETAQGLDR	4.05247	-	4.49475
microtubule-associated protein 1S isoform X2	Map1s	568955484	1424.74	ALCYVISGQGQR	4.06165	-	2.59635
protein transport protein Sec23A isoform X1	Sec23a	568979157	1520.8	AVLNPLCQVDYR	4.24332	-	2.46811
transmembrane emp24 protein transport domain containing 7 precursor	Tmed7	255003819	2147.1	VSALTQMESACVSIHEALK	4.28903	-	2.43084
phosphatidylinositol transfer protein beta isoform isoform 3	Pitpnb	675294842	1273.59	AWNAYPYCR	4.29276	-	2.03366
striatin-4 isoform X1	Strn4	568946741	1287.66	TCVQEITAHR	4.2945	-	2.29015
asparagine--tRNA ligase, cytoplasmic isoform 2	Nars	219275596	995.508	DVCLYPR	4.53654	-	2.18146
protein Niban	Fam129a	241982745	1453.71	QYSVAFCNHVR	4.91899	-	2.87503
stress-70 protein, mitochondrial	Hspa9	162461907	1926.87	MEEFKDQLPADECNK	5.248	-	2.58203
phosphoserine phosphatase isoform X1	Psph	568937746	1529.72	FCGVEAAVSEMTR	5.34544	-	4.00373
succinate dehydrogenase [ubiquinone] flavoprotein subunit, mitochondrial precursor	Sdha	54607098	1830.92	AAFGLSEAGFNTACLTK	5.47125	-	4.8634
cullin-associated NEDD8-dissociated protein 1	Cand1	189409138	1368.74	TYIQCIAAISR	5.66895	-	3.11569
importin-5 isoform X4	Ipo5	568988763	1678.82	ENVNATENCISAVGK	5.83586	-	3.26197
D-3-phosphoglycerate dehydrogenase	Phgdh	52353955	2121.09	ALVDHENVISCPHLGASTK	5.88126	-	4.70825
D-3-phosphoglycerate dehydrogenase	Phgdh	52353955	2561.27	ALQSGQCAGAALDVFTEEPPRDR	5.89294	-	3.14093
glucosamine 6-phosphate N-acetyltransferase isoform X3	Gnpnat1	568988218	1379.66	VEDVVVSDECR	6.58022	-	3.71682
serine hydroxymethyltransferase, mitochondrial isoform 2	Shmt2	356640163	1433.75	AALEALGSCLNNK	6.62657	-	4.07235
U5 small nuclear ribonucleoprotein 200 kDa helicase	Snrnp200	40018610	1281.66	TNVALMCMLR	6.93707	-	2.40794
adenylyl cyclase-associated protein 1 isoform X1	Cap1	568928280	2250.99	LEAVSHTSDMHCGYGDSPSK	7.4667	-	4.61072
tubulin-specific chaperone D isoform X5	Tbcd	568971131	1220.65	ICQTVGVNTR	8.21183	-	2.31912
DNA replication licensing factor MCM3	Mcm3	33859484	1854.87	EEPFSSEEIQACLSR	8.86635	-	4.23603
AP-2 complex subunit alpha-2	Ap2a2	163644277	1399.68	AVDLLYAMCDR	9.31048	-	2.78838
glycine--tRNA ligase	Gars	93102417	1699.82	TSYGWIEIVGCADR	10.1183	-	4.19895
cytosol aminopeptidase	Lap3	255069715	1766.89	ADMGGAATICSAIVSAAK	11.9912	-	3.6469
dnaJ homolog subfamily C member 3 precursor	Dnajc3	31542563	1097.54	ICHCFSK	14.7388	-	2.2725
sodium/potassium-transporting ATPase subunit alpha-1 precursor	Atp1a1	21450277	1158.6	ACVVHGSDLK	15.431	-	2.50832
T-complex protein 1 subunit alpha isoform 2	Tcp1	595582154	1376.72	VLCELADLQDK	17.4032	-	2.37346
ribose-phosphate pyrophosphokinase 1	Prps1	10946854	2335.17	INNACFEAVVVTNTIPQEDK	17.4391	-	3.63052
sodium/potassium-transporting ATPase subunit alpha-1 precursor	Atp1a1	21450277	2442.34	IAGLCNRAVFQANQENLPILK	18.9352	-	3.79489
CAD protein isoform 2	Cad	575501556	2451.22	VVEPELMGTPDGPCYPAPPVPR	19.9338	-	3.10941
transitional endoplasmic reticulum ATPase	Vcp	225543319	2258.95	EDEEESLNEVGYDDIGGCR	23.5123	> 10	5.90437
rab GDP dissociation inhibitor alpha	Gdi1	33859560	1549.78	QLICDPSYIPDR	25.3335	7	2.65872
histidine--tRNA ligase, cytoplasmic	Hars	251823891	1681.84	ILDGMFAVCGVPDSK	33.376	3.8	3.30279
ATP-dependent RNA helicase A isoform X1	Dhx9	568908101	1361.77	LAAQSCALSLVR	36.9441	> 10	4.41677
aminoacyl tRNA synthase complex-interacting multifunctional protein 1	Aimp1	126012517	1767.86	GVLSQAMVMCASSPEK	49.6513	4.6	4.18007
D-3-phosphoglycerate dehydrogenase	Phgdh	52353955	2290.13	ALQSGQCAGAALDVFTEEPPR	74.6921	17	5.28518
L-gulonolactone oxidase	Gulo	30520195	1493.76	GDDILLSPCFQR	81.5171	18.8	3.06259
