# Supplementary material for: Quantitative H2S-mediated protein sulfhydration reveals metabolic reprogramming during the integrated stress response
Source: eLife. 2015 Nov 23;4:e10067. doi: 10.7554/eLife.10067 (PMC4733038; doi:10.7554/eLife.10067)
Supplement: Figure 3—source data 2. — DOI: http://dx.doi.org/10.7554/eLife.10067.024 [file elife-10067-fig3-data2.xlsx]

## Sheet: Sulfhydrome from TG18h MIN6
Protein name	accession #	MW	number of peptides	Cov	Spectral	NSAF
		kDa	#	%	Counts	Global
histone H2B type 1-B	28316760	14	2	0.17	5	1.26
endoplasmin precursor	6755863	92	3	0.059	7	1.16
histone H2A type 2-A	30061399	14	1	0.054	3	0.0477
glyceraldehyde-3-phosphate dehydrogenase isoform 1	576080555	39	5	0.13	15	1
78 glucose-regulated protein precursor	254540166	72	2	0.043	3	0.968
elongation factor 1-alpha 1	126032329	50	11	0.31	26	0.769
ATP-citrate synthase isoform 1	313151222	121	17	0.2	50	0.688
histone H4	21361209	11	2	0.21	2	0.689
heat shock protein HSP 90-alpha	6754254	85	5	0.11	15	0.659
elongation factor 2	33859482	95	23	0.33	57	0.625
actin, cytoplasmic 1	6671509	42	11	0.28	29	0.584
protein disulfide-isomerase precursor	42415475	57	3	0.061	5	0.582
transitional endoplasmic reticulum ATPase	225543319	89	6	0.14	15	0.523
LOW QUALITY PROTEIN: ubiquitin-40S ribosomal protein S27a-like isoform X1	755490905	18	1	0.083	4	0.469
mesencephalic astrocyte-derived neurotrophic factor precursor	110625813	20	2	0.16	3	0.51
ADP-ribosylation factor 1	194353962	21	1	0.055	1	0.489
protein disulfide-isomerase A6 precursor	58037267	49	2	0.056	8	0.478
peptidyl-prolyl cis-trans isomerase A	6679439	18	3	0.3	8	0.479
heat shock cognate 71 protein	31981690	71	3	0.062	18	0.441
hypoxia up-regulated protein 1 precursor	157951706	111	3	0.022	10	0.43
tubulin beta-4B chain	22165384	50	5	0.16	29	0.43
cofilin-1	6680924	19	4	0.15	9	0.419
dihydropyrimidinase-related protein 2	40254595	62	2	0.054	4	0.409
tubulin alpha-1A chain	6755901	50	9	0.33	28	0.398
protein disulfide-isomerase A3 precursor	112293264	57	1	0.036	1	0.395
clathrin heavy chain 1 isoform X1	568975333	192	24	0.14	58	0.394
heat shock protein HSP 90-beta	40556608	83	5	0.11	15	0.39
pyruvate kinase PKM isoform M2	31981562	58	9	0.28	28	0.369
60S ribosomal protein L12	160333553	18	3	0.3	8	0.352
ubiquitin-like modifier-activating enzyme 1 isoform 2	209862989	118	10	0.18	23	0.346
nucleoside diphosphate kinase A	37700232	17	1	0.059	2	0.347
alpha-actinin-4	11230802	105	4	0.052	8	0.331
calnexin precursor	160333212	67	1	0.054	1	0.314
annexin A6 isoform a	31981302	76	1	0.024	1	0.311
coatomer subunit gamma-1 isoform 1	8567338	98	7	0.13	22	0.303
eukaryotic translation initiation factor 5A-1	262359885	17	1	0.16	2	0.304
ras-related protein Rab-1A	6679587	23	3	0.14	6	0.298
bifunctional 3'-phosphoadenosine 5'-phosphosulfate synthase 2 isoform X1	569007203	70	6	0.22	15	0.296
40S ribosomal protein S18	6755368	18	1	0.039	2	0.29
heterogeneous nuclear ribonucleoprotein A3 isoform a	31559916	40	2	0.061	7	0.267
glutamine--fructose-6-phosphate aminotransferase [isomerizing] 1	7305085	77	7	0.12	18	0.264
ATP synthase subunit d, mitochondrial	21313679	19	1	0.075	2	0.265
staphylococcal nuclease domain-containing protein 1	77404392	102	6	0.1	13	0.263
phosphoglycerate mutase 1	114326546	29	1	0.063	2	0.264
UDP-glucose:glycoprotein glucosyltransferase 1 precursor	236466498	176	1	0.012	2	0.262
coatomer subunit alpha	226823359	138	12	0.12	21	0.258
V-type proton ATPase catalytic subunit A	31560731	68	3	0.058	3	0.256
histone H3.2	21489953	15	5	0.38	23	0.0351
14-3-3 protein epsilon	226874906	29	1	0.047	2	0.253
peroxiredoxin-1	6754976	22	2	0.23	6	0.25
CDK5 regulatory subunit-associated protein 2 isoform X10	755506225	28	4	0.15	10	0.249
40S ribosomal protein S17	6677801	16	1	0.081	2	0.246
glycerol-3-phosphate dehydrogenase, mitochondrial precursor	224922803	81	1	0.019	2	0.242
40S ribosomal protein S8	6677813	24	3	0.2	7	0.239
heat shock 70 protein 4	112293266	94	2	0.039	4	0.236
ADP/ATP translocase 1	148747424	33	5	0.24	21	0.125
sarcoplasmic/endoplasmic reticulum calcium ATPase 2 isoform b	158635979	115	13	0.19	28	0.232
stress-induced-phosphoprotein 1	14389431	63	2	0.052	3	0.23
glycine--tRNA ligase	93102417	82	3	0.053	7	0.229
calreticulin precursor	6680836	48	2	0.087	8	0.229
neutral alpha-glucosidase AB isoform 2 precursor	651164671	107	1	0.024	2	0.228
alanine--tRNA ligase, cytoplasmic	34610207	107	4	0.093	11	0.228
ATP-dependent RNA helicase DDX3X	6753620	73	2	0.042	8	0.225
ras-related protein Rap-1b precursor	33859753	21	1	0.038	2	0.224
40S ribosomal protein S7	6755376	22	1	0.062	2	0.223
dolichyl-diphosphooligosaccharide--protein glycosyltransferase subunit 1 precursor	282398108	69	1	0.015	1	0.22
high mobility group protein B1	407262920	25	2	0.13	9	0.22
NADH-cytochrome b5 reductase 3 isoform X2	568991032	32	3	0.19	13	0.201
alpha-enolase	158853992	47	5	0.14	12	0.218
14-3-3 protein zeta/delta isoform 1	359385696	28	2	0.073	4	0.218
surfeit locus protein 4	6755698	30	1	0.048	4	0.216
coatomer subunit beta	15426055	107	4	0.058	6	0.214
polyadenylate-binding protein 1	31560656	71	2	0.049	4	0.214
histidine triad nucleotide-binding protein 1	33468857	14	2	0.22	6	0.215
heterogeneous nuclear ribonucleoprotein U	160333923	88	4	0.084	10	0.211
ras-related protein Rab-7a	148747526	23	2	0.13	2	0.21
myosin-9	114326446	226	4	0.023	5	0.204
annexin A4	161016799	36	3	0.11	7	0.204
sodium/potassium-transporting ATPase subunit alpha-1 precursor	21450277	113	9	0.11	13	0.203
DNA replication licensing factor MCM3	33859484	92	5	0.075	12	0.202
40S ribosomal protein S12	40254577	15	4	0.27	9	0.205
protein canopy homolog 2 isoform X1	568968091	21	3	0.25	4	0.202
destrin	9790219	19	4	0.19	7	0.202
phosphoglycerate kinase 1	70778976	45	4	0.14	9	0.198
coatomer subunit beta'	29789080	102	3	0.045	7	0.197
calcium-binding mitochondrial carrier protein Aralar1	27369581	75	2	0.066	3	0.197
aconitate hydratase, mitochondrial precursor	18079339	85	1	0.026	2	0.197
DNA replication licensing factor MCM2	172088119	102	2	0.023	4	0.195
triosephosphate isomerase	226958349	32	3	0.2	7	0.195
transgelin-2	30519911	22	1	0.095	4	0.194
LOW QUALITY PROTEIN: igE-binding protein-like, partial	755490861	49	1	0.021	2	0.108
ATP synthase subunit O, mitochondrial precursor	20070412	23	1	0.1	3	0.193
40S ribosomal protein S3	6755372	27	6	0.23	10	0.191
40S ribosomal protein S14	31981100	16	2	0.27	4	0.191
nucleoside diphosphate kinase B	117606270	17	1	0.12	2	0.19
glutathione S-transferase P 1	10092608	24	1	0.12	3	0.188
peroxiredoxin-2	148747558	22	3	0.3	6	0.188
eukaryotic initiation factor 4A-I isoform 1	21450625	46	2	0.081	3	0.187
annexin A5	6753060	36	1	0.034	4	0.186
60S ribosomal protein L32	25742730	16	1	0.096	2	0.187
60 heat shock protein, mitochondrial	183396771	61	2	0.052	4	0.184
rho GDP-dissociation inhibitor 1	31982030	23	1	0.12	4	0.184
heterogeneous nuclear ribonucleoproteins A2/B1 isoform X1	755517048	37	1	0.023	1	0.183
delta-1-pyrroline-5-carboxylate synthase isoform 1	255958292	87	2	0.05	3	0.184
CDGSH iron-sulfur domain-containing protein 1	19527228	12	2	0.1	2	0.184
protein transport protein Sec31A	244791271	134	5	0.069	9	0.179
fatty acid synthase	93102409	272	15	0.13	28	0.178
small nuclear ribonucleoprotein Sm D2	58037145	14	1	0.085	2	0.176
signal recognition particle subunit SRP68	47271535	71	1	0.021	2	0.172
fatty acid-binding protein, epidermal isoform 1	6754450	15	1	0.081	2	0.174
bifunctional glutamate/proline--tRNA ligase isoform X1	568911608	171	11	0.11	21	0.172
40S ribosomal protein S11	21426889	18	2	0.18	6	0.173
tryptophan--tRNA ligase, cytoplasmic isoform 2	256818746	54	6	0.15	13	0.169
programmed cell death 6-interacting protein isoform 3	258547156	96	1	0.013	2	0.169
DNA replication licensing factor MCM7	10242373	81	1	0.018	1	0.169
40S ribosomal protein S23	13195604	16	1	0.19	2	0.169
ras-related protein Rab-2A	10946940	24	1	0.047	2	0.167
GTP-binding nuclear protein Ran isoform X1	568937764	24	4	0.097	9	0.166
ATP synthase subunit alpha, mitochondrial precursor	6680748	60	1	0.02	2	0.166
rab GDP dissociation inhibitor beta	116089273	51	6	0.19	11	0.165
ras-related protein Rab-3A	261862303	25	1	0.036	2	0.164
ras GTPase-activating-like protein IQGAP1	242332572	189	1	0.0084	2	0.164
proteasome subunit alpha type-7 isoform 1	7106389	28	1	0.036	2	0.165
60S ribosomal protein L7	31981515	31	1	0.067	4	0.164
protein transport protein Sec23B isoform 1	31980969	86	9	0.17	17	0.162
exportin-2	12963737	110	4	0.068	6	0.163
translationally-controlled tumor protein	6678437	19	1	0.076	2	0.16
60S ribosomal protein L27a	31560517	17	2	0.15	3	0.162
transketolase	6678359	68	2	0.077	4	0.158
40S ribosomal protein S15a	24762230	15	3	0.15	8	0.159
ras-related protein Rab-14	18390323	24	1	0.047	2	0.158
heterogeneous nuclear ribonucleoprotein Q isoform 2	29788787	63	3	0.059	5	0.157
signal recognition particle 72	118344452	75	2	0.051	4	0.156
phosphatidylethanolamine-binding protein 1	84794552	21	3	0.37	6	0.156
glutathione S-transferase Mu 1	6754084	26	1	0.041	2	0.155
proteasome subunit beta type-1 precursor	7242197	26	1	0.025	1	0.154
cullin-associated NEDD8-dissociated protein 1	189409138	136	7	0.074	11	0.153
filamin-B isoform b	145966915	277	5	0.028	6	0.152
DNA replication licensing factor MCM6	6678832	93	5	0.08	10	0.153
60S ribosomal protein L23	12584986	15	2	0.2	6	0.154
importin subunit beta-1	88014720	97	5	0.11	12	0.152
GTP-binding protein SAR1a	21703344	22	1	0.1	2	0.151
40S ribosomal protein S5	254675270	23	4	0.2	10	0.151
40S ribosomal protein S3a	254553321	30	2	0.083	6	0.151
heterogeneous nuclear ribonucleoprotein M isoform b	158186704	74	3	0.023	5	0.15
eukaryotic translation initiation factor 3 subunit B	29789343	91	2	0.037	4	0.149
eukaryotic translation initiation factor 2 subunit 1	13385624	36	1	0.025	1	0.15
DNA replication licensing factor MCM4	255918149	97	3	0.041	5	0.149
arginine--tRNA ligase, cytoplasmic	262118273	76	2	0.032	4	0.149
T-complex protein 1 subunit alpha isoform 1	110625624	60	3	0.052	8	0.149
heterogeneous nuclear ribonucleoprotein K isoform 2	13384620	51	3	0.12	4	0.148
deoxyuridine triphosphatase isoform 2	21281687	17	1	0.049	1	0.149
cofilin-2	6671746	19	1	0.066	1	0.149
vesicle-fusing ATPase	31543349	83	5	0.083	9	0.147
heterogeneous nuclear ribonucleoprotein A1 isoform a	6754220	34	1	0.072	2	0.148
60S ribosomal protein L30	254553337	13	3	0.41	7	0.149
peroxiredoxin-4 precursor	7948999	31	3	0.24	5	0.147
CAD protein isoform 1	51093867	243	11	0.093	20	0.146
60S ribosomal protein L7a	7305443	30	4	0.15	8	0.146
superoxide dismutase [Cu-Zn]	45597447	16	1	0.065	1	0.146
guanine nucleotide-binding protein G(o) subunit alpha isoform B	164607137	40	5	0.17	7	0.145
probable ATP-dependent RNA helicase DDX5 isoform X1	568971472	69	5	0.094	9	0.144
ubiquitin carboxyl-terminal hydrolase 5 isoform X1	568941433	93	1	0.028	2	0.143
cytoplasmic dynein 1 heavy chain 1	134288917	532	6	0.02	8	0.143
60S ribosomal protein L31	16716589	14	1	0.11	1	0.144
60S ribosomal protein L18a	58037465	21	2	0.15	4	0.143
60S ribosomal protein L10	16418339	25	1	0.13	1	0.144
26S proteasome non-ATPase regulatory subunit 2	19882201	100	6	0.096	9	0.143
trifunctional enzyme subunit alpha, mitochondrial precursor	33859811	83	1	0.031	2	0.141
malate dehydrogenase, mitochondrial precursor	31982186	36	4	0.19	7	0.142
sec1 family domain-containing protein 1	58037481	72	1	0.025	1	0.14
ATP-dependent RNA helicase A	150456419	150	4	0.033	9	0.141
60S acidic ribosomal protein P1	9256519	11	2	0.61	7	0.142
guanine nucleotide-binding protein subunit beta-2-like 1	6680047	35	8	0.41	21	0.139
60S ribosomal protein L3	255308899	46	4	0.074	9	0.14
T-complex protein 1 subunit beta	126521835	57	3	0.077	8	0.138
proteasome subunit beta type-3	6755202	23	1	0.044	2	0.138
serine/arginine-rich splicing factor 1 isoform 2	118582271	22	1	0.06	2	0.138
pyridoxal-dependent decarboxylase domain-containing protein 1 isoform X4	568996709	87	4	0.07	7	0.137
proteasome subunit alpha type-6	6755198	27	2	0.045	2	0.138
60S acidic ribosomal protein P0	6671569	34	4	0.22	10	0.137
poly(rC)-binding protein 1	6754994	37	7	0.35	10	0.134
phosphate carrier protein, mitochondrial precursor	19526818	40	1	0.076	2	0.133
ATP-dependent RNA helicase DDX1	19527256	83	2	0.031	5	0.133
NADH dehydrogenase [ubiquinone] 1 alpha subcomplex subunit 8	21312012	20	1	0.064	2	0.133
fructose-bisphosphate aldolase A isoform 1 precursor	293597567	45	4	0.17	8	0.132
kinesin-1 heavy chain	61657921	110	1	0.0083	1	0.131
importin-5	29789199	124	8	0.16	10	0.131
general vesicular transport factor p115	23956096	107	5	0.092	7	0.131
40S ribosomal protein S4, X isoform	6677805	30	3	0.11	10	0.131
thioredoxin-like protein 1	31543902	32	1	0.066	1	0.13
eukaryotic translation initiation factor 3 subunit A	146219837	162	3	0.022	4	0.13
alpha-soluble NSF attachment protein	13385392	33	1	0.051	1	0.129
ubiquitin-conjugating enzyme E2 N	18017605	17	1	0.046	1	0.13
DNA replication licensing factor MCM5	112293273	82	3	0.048	5	0.128
D-dopachrome decarboxylase	6753618	13	1	0.13	2	0.13
secretagogin	21703798	32	2	0.11	4	0.128
60S ribosomal protein L13a	31981945	23	1	0.059	2	0.128
AP-2 complex subunit beta isoform a	78711838	106	5	0.058	10	0.127
alpha-actinin-1 isoform X4	568978634	106	1	0.048	2	0.127
60S ribosomal protein L6 isoform X1	568936990	34	1	0.051	3	0.127
malate dehydrogenase, cytoplasmic	254540027	37	4	0.17	9	0.126
hydroxyacyl-coenzyme A dehydrogenase, mitochondrial precursor	111038118	34	2	0.13	5	0.125
ribosome-binding protein 1 isoform a	124486712	158	1	0.0075	1	0.123
isocitrate dehydrogenase [NAD] subunit alpha, mitochondrial precursor	18250284	40	1	0.027	2	0.123
fumarate hydratase, mitochondrial precursor	226823367	54	1	0.051	1	0.122
elongation factor 1-gamma	110625979	50	4	0.16	26	0.122
dynamin-1-like protein isoform b	71061455	78	1	0.016	1	0.122
ADP-ribosylation factor 5	6680722	21	2	0.29	3	0.121
60S ribosomal protein L28	6677779	16	1	0.058	4	0.122
aromatic-L-amino-acid decarboxylase	22094149	54	3	0.1	4	0.12
60S ribosomal protein L24	18250296	18	1	0.064	2	0.121
sarcoplasmic/endoplasmic reticulum calcium ATPase 3 isoform a	254039658	110	3	0.096	7	0.119
hypoxanthine-guanine phosphoribosyltransferase	96975138	25	3	0.25	7	0.119
exportin-1	38604071	123	1	0.021	2	0.119
coatomer subunit epsilon	10946972	35	3	0.23	4	0.119
transforming protein RhoA precursor	31542143	22	4	0.33	9	0.119
ribonuclease inhibitor isoform a	285402638	50	11	0.4	16	0.118
voltage-dependent anion-selective channel protein 1	6755963	31	2	0.11	3	0.116
vigilin	19527028	142	2	0.0079	3	0.117
succinate dehydrogenase [ubiquinone] flavoprotein subunit, mitochondrial precursor	54607098	73	5	0.13	8	0.117
ras-related protein Rab-21	33859751	24	2	0.054	2	0.117
14-3-3 protein beta/alpha	31543974	28	2	0.081	4	0.116
40S ribosomal protein SA	224994260	33	2	0.13	4	0.115
T-complex protein 1 subunit zeta	6753324	58	1	0.047	4	0.115
heterogeneous nuclear ribonucleoprotein A/B isoform 1	146260280	36	2	0.078	3	0.115
eukaryotic translation initiation factor 3 subunit L	51093840	67	1	0.028	1	0.114
spermidine synthase	6678131	34	2	0.14	2	0.114
nudC domain-containing protein 2 isoform 1	133922575	18	1	0.07	2	0.115
glucosidase 2 subunit beta isoform X1	568959019	60	1	0.025	2	0.113
aspartate aminotransferase, mitochondrial	6754036	47	7	0.23	14	0.114
T-complex protein 1 subunit gamma	6753320	61	5	0.11	8	0.112
synaptic vesicle membrane protein VAT-1 homolog-like	33667095	46	5	0.23	12	0.112
proteasome subunit alpha type-5	7106387	26	1	0.079	1	0.113
heterogeneous nuclear ribonucleoprotein L isoform X2	568944892	68	4	0.11	6	0.112
AP-2 complex subunit alpha-1 isoform b	116256510	105	5	0.058	10	0.113
prolyl endopeptidase	6755152	81	3	0.08	5	0.111
cytochrome c oxidase subunit II (mitochondrion)	34538601	26	1	0.17	1	0.111
2-oxoglutarate dehydrogenase, mitochondrial isoform 3	356582489	116	2	0.023	3	0.111
ras-related C3 botulinum toxin substrate 1 precursor	45592934	21	4	0.23	10	0.111
6-phosphogluconolactonase isoform 1	13384778	27	4	0.27	8	0.11
14-3-3 protein eta	6756037	28	2	0.1	3	0.111
threonine--tRNA ligase, cytoplasmic	27229277	83	3	0.066	7	0.109
T-complex protein 1 subunit eta	238814391	60	7	0.17	15	0.109
serine/threonine-protein phosphatase 2A 65 regulatory subunit A alpha isoform	8394027	65	3	0.09	9	0.109
myb-binding protein 1A	31982724	152	1	0.013	4	0.109
leucine--tRNA ligase, cytoplasmic	120537241	134	1	0.0085	2	0.109
serine--tRNA ligase, cytoplasmic isoform 2	326381098	58	3	0.07	5	0.108
ADP/ATP translocase 2	22094075	33	1	0.19	2	0.217
3'(2'),5'-bisphosphate nucleotidase 1	39652626	33	2	0.12	3	0.0991
pyruvate carboxylase, mitochondrial isoform 2	251823978	130	2	0.019	3	0.107
rab GDP dissociation inhibitor alpha	33859560	51	5	0.17	8	0.106
T-complex protein 1 subunit delta	6753322	58	5	0.15	10	0.106
40S ribosomal protein S2	18087805	31	3	0.11	8	0.106
valine--tRNA ligase	255069795	140	5	0.084	7	0.106
ribose-phosphate pyrophosphokinase 1	10946854	35	4	0.21	8	0.106
ubiquitin carboxyl-terminal hydrolase isozyme L1	188219614	25	2	0.12	4	0.106
electron transfer flavoprotein subunit alpha, mitochondrial	227500281	35	2	0.075	3	0.106
leucine-rich repeat-containing protein 59	19527026	35	4	0.2	6	0.105
ran-specific GTPase-activating protein	153792001	24	1	0.11	2	0.104
high mobility group protein B2 isoform X1	568955035	24	2	0.13	7	0.104
ubiquitin carboxyl-terminal hydrolase isozyme L3	139948802	26	2	0.15	3	0.104
ERO1-like protein beta isoform X3	568981946	52	5	0.13	14	0.103
chromobox protein homolog 3	108860695	21	3	0.29	4	0.103
60S ribosomal protein L9	14149647	22	1	0.062	2	0.103
60S ribosomal protein L36	160333837	12	1	0.095	2	0.103
proteasome subunit beta type-2	227116345	23	1	0.035	2	0.102
thioredoxin-related transmembrane protein 1 precursor	33859722	31	1	0.047	2	0.101
60S ribosomal protein L4	30794450	47	6	0.16	11	0.101
NADPH--cytochrome P450 reductase isoform X1	568938051	77	1	0.018	1	0.101
cytosolic 5'-nucleotidase 3A isoform 2	356991161	34	2	0.074	3	0.101
tripeptidyl-peptidase 2 isoform X1	568906168	138	3	0.036	4	0.101
ADP-ribosylation factor 4	6680720	20	1	0.23	2	0.101
transaldolase	33859640	37	1	0.039	2	0.1
CTP synthase 1	172072613	67	2	0.047	2	0.1
serine/threonine-protein phosphatase PP1-gamma catalytic subunit isoform X1	568936934	39	4	0.16	6	0.1
T-complex protein 1 subunit theta	126723461	60	3	0.082	8	0.0997
40S ribosomal protein S6	755501126	29	2	0.12	6	0.0992
eukaryotic translation initiation factor 3 subunit D	125628629	64	3	0.077	5	0.099
cellular nucleic acid-binding protein isoform X1	568940541	19	2	0.17	3	0.0993
V-type proton ATPase subunit G 1	15617197	14	2	0.34	6	0.0993
microtubule-associated protein 1B	171543853	270	2	0.011	3	0.0983
NADH dehydrogenase [ubiquinone] 1 beta subcomplex subunit 7	13385322	16	1	0.066	1	0.0987
phospholipase A-2-activating protein	114431250	87	3	0.045	4	0.0975
succinate dehydrogenase [ubiquinone] iron-sulfur subunit, mitochondrial precursor	34328286	32	1	0.092	1	0.0972
nucleolar protein 56	126090932	64	1	0.017	2	0.0968
cytochrome c oxidase subunit 5B, mitochondrial	112807195	14	1	0.16	1	0.0978
membrane-associated progesterone receptor component 1	31980806	22	1	0.046	1	0.0971
ubiquitin thioesterase OTUB1	19527388	31	1	0.037	1	0.0967
E3 UFM1-protein ligase 1	227330590	90	1	0.015	1	0.0957
26S proteasome non-ATPase regulatory subunit 1	74315975	106	1	0.027	1	0.0958
eukaryotic translation initiation factor 1	22165347	13	2	0.12	4	0.0957
heterogeneous nuclear ribonucleoprotein D0 isoform a	116256512	38	3	0.068	6	0.0945
serine hydroxymethyltransferase, mitochondrial isoform 1	21312298	56	1	0.026	2	0.0944
alcohol dehydrogenase 1	6724311	40	4	0.25	6	0.0943
40S ribosomal protein S26	255003793	13	1	0.1	2	0.094
peptidyl-prolyl cis-trans isomerase FKBP4	6753882	52	2	0.07	3	0.0923
pyrroline-5-carboxylate reductase 1, mitochondrial	21450149	32	1	0.042	2	0.0921
protein phosphatase 1 regulatory subunit 1A	10946734	19	1	0.058	2	0.092
ras-related protein Rab-18 isoform 2 precursor	30841008	23	1	0.068	2	0.0919
amine oxidase [flavin-containing] B	257196228	59	2	0.044	5	0.0915
acetyl-CoA acetyltransferase, mitochondrial precursor	21450129	45	2	0.11	3	0.0914
non-POU domain-containing octamer-binding protein	255958247	55	1	0.023	4	0.0911
gasdermin-A	10946666	50	4	0.15	9	0.0909
farnesyl pyrophosphate synthase isoform 1 precursor	359279938	48	2	0.048	4	0.0905
phenylalanine--tRNA ligase beta subunit	31981400	66	1	0.022	1	0.0902
dihydropteridine reductase	21312520	26	1	0.054	2	0.0903
60S ribosomal protein L8	6755358	28	1	0.078	3	0.0903
chloride intracellular channel protein 1	15617203	27	2	0.075	3	0.0901
eukaryotic translation initiation factor 6	27501448	27	1	0.1	1	0.0901
aspartate--tRNA ligase, cytoplasmic isoform 1	211065507	57	1	0.018	2	0.0897
40S ribosomal protein S24 isoform 1	46519156	15	1	0.092	1	0.0901
60S ribosomal protein L15	13385036	24	1	0.034	1	0.0889
asparagine--tRNA ligase, cytoplasmic isoform 2	219275596	64	7	0.17	17	0.0883
cystathionine beta-synthase isoform 1	21450071	62	7	0.17	12	0.0875
mannosyl-oligosaccharide glucosidase	31981106	92	1	0.0096	2	0.0874
cAMP-dependent protein kinase type I-alpha regulatory subunit	30794476	43	1	0.026	1	0.0872
transportin-1 isoform 2	115385966	101	6	0.12	12	0.087
signal recognition particle 19 protein	160333840	16	3	0.35	4	0.0876
protein BUD31 homolog isoform X1	568939000	17	1	0.069	1	0.0876
heterogeneous nuclear ribonucleoprotein R isoform a	33859724	71	1	0.052	2	0.0865
F-actin-capping protein subunit beta isoform d	407027854	29	1	0.096	2	0.0864
glutathione peroxidase 1	84871986	22	1	0.045	2	0.0863
leucine-rich PPR motif-containing protein, mitochondrial precursor	134031976	157	5	0.078	6	0.086
dehydrogenase/reductase SDR family member 4 isoform 1	256220343	30	1	0.036	1	0.0858
creatine kinase B-type	10946574	43	2	0.076	4	0.0855
protein Niban	241982745	103	2	0.027	5	0.0855
prohibitin	6679299	30	1	0.099	3	0.0853
GDP-mannose 4,6 dehydratase	22122523	42	4	0.15	6	0.0852
glutathione S-transferase Mu 5	6754086	27	1	0.049	2	0.0845
voltage-dependent anion-selective channel protein 2	6755965	32	1	0.075	1	0.0838
U5 small nuclear ribonucleoprotein 200 helicase	40018610	245	3	0.021	7	0.0836
eukaryotic peptide chain release factor GTP-binding subunit ERF3A isoform 1	194018529	69	3	0.096	6	0.0835
proliferating cell nuclear antigen	7242171	29	2	0.1	4	0.0832
T-complex protein 1 subunit epsilon	6671702	60	2	0.1	4	0.083
protein HID1	29825825	89	1	0.016	2	0.0828
40S ribosomal protein S20	13385652	13	1	0.059	3	0.0833
lon protease homolog, mitochondrial precursor	116089322	106	2	0.033	5	0.0812
V-type proton ATPase subunit B, brain isoform	19705578	57	4	0.13	6	0.081
ATP-dependent 6-phosphofructokinase, platelet type isoform X1	568981400	80	1	0.033	2	0.0808
proteasome subunit alpha type-4 isoform X1	568961543	29	2	0.21	6	0.0803
extended synaptotagmin-1	33859650	122	2	0.016	3	0.0799
elongation factor 1-beta	31980922	25	1	0.19	2	0.0799
S-formylglutathione hydrolase isoform 2	13937355	31	3	0.16	4	0.0798
thimet oligopeptidase	239916005	78	1	0.015	1	0.0796
ATP synthase subunit gamma, mitochondrial isoform b	163838648	30	1	0.044	1	0.0797
splicing factor 3B subunit 1	153791358	146	1	0.0084	2	0.0794
ADP-sugar pyrophosphatase isoform X2	568912477	29	1	0.042	3	0.0794
26S proteasome non-ATPase regulatory subunit 6	46049022	46	1	0.028	1	0.0793
TBC1 domain family member 15	255958202	77	3	0.072	5	0.0792
isoleucine--tRNA ligase, cytoplasmic	254553372	144	3	0.036	4	0.0788
adenine phosphoribosyltransferase	118601013	20	1	0.11	4	0.0789
lamina-associated polypeptide 2 isoform alpha	121949760	75	1	0.048	1	0.0784
splicing factor 3B subunit 3	19527174	136	1	0.0066	2	0.0784
calpain-2 catalytic subunit	157951598	80	3	0.059	6	0.0781
60S ribosomal protein L5	23956082	34	3	0.094	9	0.0782
isocitrate dehydrogenase [NADP], mitochondrial precursor	225579033	51	3	0.073	4	0.078
eukaryotic translation initiation factor 3 subunit C	22203755	106	2	0.012	2	0.0779
AP-1 complex subunit beta-1 isoform 1	339895913	105	1	0.07	1	0.0777
polypyrimidine tract-binding protein 1 isoform 1	116517301	59	2	0.061	3	0.0775
guanine nucleotide-binding protein G(I)/G(S)/G(T) subunit beta-2	13937391	37	6	0.37	7	0.0771
serpin B6 isoform b	255759943	43	3	0.087	4	0.0769
putative pre-mRNA-splicing factor ATP-dependent RNA helicase DHX15 isoform 2	110835723	91	1	0.02	1	0.0764
14-3-3 protein gamma	31543976	28	4	0.22	11	0.0764
aminoacyl tRNA synthase complex-interacting multifunctional protein 1	126012517	35	1	0.025	2	0.0764
platelet-activating factor acetylhydrolase IB subunit gamma	6679201	26	1	0.034	2	0.0761
long-chain-fatty-acid--CoA ligase 5 isoform X1	569007473	76	4	0.073	5	0.0756
eukaryotic translation initiation factor 3 subunit E	45476573	52	1	0.02	2	0.0752
serine/threonine-protein phosphatase 2A catalytic subunit beta isoform	8394024	36	2	0.091	3	0.0751
purine nucleoside phosphorylase	7305395	32	1	0.052	3	0.0751
60S ribosomal protein L11	13385408	20	1	0.045	2	0.0753
ran GTPase-activating protein 1	226051567	64	1	0.041	2	0.0747
actin-related protein 2/3 complex subunit 2	112363072	34	1	0.03	1	0.0749
transmembrane emp24 domain-containing protein 3 precursor	281427153	25	2	0.11	5	0.0749
probable ATP-dependent RNA helicase DDX17 isoform 1	40068493	73	1	0.069	1	0.0745
heterogeneous nuclear ribonucleoprotein L-like	110347535	64	1	0.022	2	0.0745
importin-7 isoform X1	568950272	119	4	0.076	8	0.0743
poly(rC)-binding protein 2 isoform 3	157042772	35	3	0.21	5	0.0743
acidic leucine-rich nuclear phosphoprotein 32 family member B	18700032	31	1	0.044	1	0.0743
GPI inositol-deacylase	254028203	105	1	0.012	2	0.0741
26S protease regulatory subunit 7	33859604	53	3	0.072	3	0.0742
ATP-dependent 6-phosphofructokinase, liver type	31560653	85	2	0.059	4	0.074
adenosylhomocysteinase	262263372	48	1	0.042	1	0.0734
cold shock domain-containing protein E1 isoform X1	568922622	86	1	0.021	1	0.0732
phosphoribosylformylglycinamidine synthase	226958458	145	2	0.029	3	0.0728
cell division control protein 42 homolog isoform 1 precursor	6753364	21	4	0.37	8	0.0731
adenylyl cyclase-associated protein 1	157951604	52	3	0.076	5	0.0725
Golgi resident protein GCP60	229608928	60	3	0.057	4	0.0723
DNA damage-binding protein 1 isoform X1	569006320	128	4	0.062	5	0.0722
carboxypeptidase E precursor	22203763	53	3	0.11	10	0.0722
malectin precursor	188497650	32	2	0.079	3	0.072
eukaryotic translation initiation factor 4 gamma 1 isoform a	56699432	176	4	0.033	6	0.072
eukaryotic translation initiation factor 5	124430541	49	1	0.016	2	0.0719
ADP-ribosylation factor-like protein 8B	13385518	22	1	0.054	2	0.0721
proliferation-associated protein 2G4	6755100	44	2	0.081	6	0.0715
guanylate kinase isoform X1	568971697	22	1	0.061	1	0.0717
GTP-binding protein SAR1b	21313476	22	1	0.1	1	0.0717
ADP-ribosylation factor 6	6680724	20	1	0.15	1	0.0721
catechol O-methyltransferase	161484634	29	2	0.13	3	0.0714
serine-threonine kinase receptor-associated protein	160707896	38	1	0.029	1	0.071
xaa-Pro aminopeptidase 1	406855427	75	2	0.041	4	0.0707
succinyl-CoA:3-ketoacid coenzyme A transferase 1, mitochondrial precursor	18266680	56	1	0.054	2	0.0706
trifunctional enzyme subunit beta, mitochondrial precursor	21704100	51	1	0.042	3	0.0705
2-oxoglutarate dehydrogenase-like, mitochondrial isoform X1	568987554	115	2	0.05	2	0.0703
tyrosine--tRNA ligase, cytoplasmic	411147387	63	1	0.021	2	0.0703
heterogeneous nuclear ribonucleoprotein F	19527048	46	2	0.099	2	0.07
cytochrome b-c1 complex subunit 2, mitochondrial precursor	22267442	48	1	0.029	2	0.07
methionine--tRNA ligase, cytoplasmic isoform 2	51491852	101	4	0.1	6	0.0697
sequestosome-1 isoform 1	6754954	48	3	0.088	8	0.0692
mitochondrial dicarboxylate carrier	254826790	32	1	0.077	1	0.0692
AP-3 complex subunit delta-1 isoform X1	568966499	136	3	0.037	6	0.0691
phosphoglucomutase-2	227330633	61	1	0.021	1	0.069
26S proteasome non-ATPase regulatory subunit 11	134053905	47	1	0.026	2	0.0689
vacuolar protein sorting-associated protein 35	13928670	92	2	0.026	3	0.0687
prostaglandin E synthase 3	9790017	19	1	0.081	2	0.069
3-ketoacyl-CoA thiolase A, peroxisomal precursor	18700004	44	1	0.047	1	0.0686
heterogeneous nuclear ribonucleoprotein U-like protein 2	124487099	85	2	0.038	4	0.0681
spliceosome RNA helicase Ddx39b	356995868	49	5	0.17	15	0.0679
26S protease regulatory subunit 10B	27754103	44	1	0.031	1	0.0679
neutral cholesterol ester hydrolase 1	30520239	46	1	0.029	1	0.0676
AP-3 complex subunit beta-2	52317148	119	1	0.015	1	0.0675
protein arginine N-methyltransferase 1 isoform 2	357197158	41	4	0.15	5	0.0674
adenylate kinase isoenzyme 1 isoform 1	10946936	23	1	0.1	2	0.0676
reticulon-3 isoform 4	16716353	25	1	0.063	3	0.0666
glyoxylate reductase/hydroxypyruvate reductase	17933768	35	1	0.076	1	0.0662
15 selenoprotein precursor	16716395	18	2	0.18	3	0.0667
protein phosphatase 1 regulatory subunit 11	18390327	15	1	0.069	3	0.0662
coatomer subunit delta	148747410	57	1	0.025	2	0.0655
MLV-related proviral Env polyprotein	755511141	70	1	0.031	1	0.0656
leucine-rich repeat-containing protein 47	41152116	64	2	0.081	4	0.0653
60S ribosomal protein L14	13385472	24	1	0.041	2	0.0654
carbonyl reductase [NADPH] 1	113680352	31	1	0.043	2	0.0649
mitochondrial carrier homolog 2	9790055	33	2	0.11	7	0.0643
lanosterol synthase	22122469	83	3	0.049	5	0.0642
stromal cell-derived factor 2-like protein 1 precursor	11612505	24	1	0.059	2	0.0642
40S ribosomal protein S27	26024336	9	1	0.095	4	0.0644
acidic leucine-rich nuclear phosphoprotein 32 family member E isoform 1	254587996	30	1	0.062	2	0.0634
NADH dehydrogenase [ubiquinone] 1 alpha subcomplex subunit 7	12963571	13	1	0.08	2	0.0638
SEC23-interacting protein	254692911	111	1	0.025	1	0.063
cysteine-rich with EGF-like domain protein 2 precursor	21313278	38	1	0.043	3	0.063
small nuclear ribonucleoprotein Sm D3	13385598	14	1	0.17	1	0.0635
serine/arginine-rich splicing factor 6	224967104	39	1	0.021	1	0.0628
guanine nucleotide-binding protein-like 1	122937361	69	1	0.025	2	0.0625
eukaryotic initiation factor 4A-II isoform X2	568994601	46	1	0.081	2	0.0626
UDP-glucose 4-epimerase	30409988	38	1	0.081	1	0.0626
V-type proton ATPase 116 subunit a isoform 1 isoform 1	12025532	96	1	0.025	1	0.0623
monofunctional C1-tetrahydrofolate synthase, mitochondrial precursor	283135110	106	2	0.029	2	0.0623
histidine--tRNA ligase, cytoplasmic	251823891	57	1	0.049	1	0.0623
dihydrolipoyl dehydrogenase, mitochondrial precursor	31982856	54	1	0.026	3	0.0623
mitochondrial import receptor subunit TOM70	27552760	68	1	0.0098	1	0.0621
proteasome activator complex subunit 2 isoform 2	71725358	26	1	0.074	4	0.0616
membrane-associated progesterone receptor component 2	226442772	23	1	0.13	2	0.0618
AP-1 complex subunit gamma-1 isoform 1	56744242	92	1	0.012	2	0.0615
dnaJ homolog subfamily C member 10 precursor	119508443	91	3	0.077	7	0.0613
signal recognition particle receptor subunit beta	6678137	30	1	0.041	1	0.0612
dnaJ homolog subfamily C member 3 precursor	31542563	57	1	0.024	1	0.0612
alpha-centractin	8392847	43	2	0.051	3	0.0609
pyrroline-5-carboxylate reductase 2	19526878	34	1	0.091	1	0.0608
endoplasmic reticulum resident protein 44 precursor	19072792	47	3	0.12	10	0.0608
citrate synthase, mitochondrial precursor	13385942	52	2	0.041	3	0.0608
dihydrolipoyllysine-residue acetyltransferase component of pyruvate dehydrogenase complex, mitochondrial	257796245	68	1	0.022	1	0.0606
sideroflexin-1	15147224	36	1	0.059	2	0.0605
ADP-ribosylation factor-like protein 3	9789881	20	1	0.066	2	0.0613
FACT complex subunit SPT16	154350222	120	1	0.011	1	0.0601
glutamate dehydrogenase 1, mitochondrial precursor	6680027	61	1	0.029	4	0.06
transcription elongation factor A protein 1 isoform 3	229094709	34	1	0.033	2	0.0599
m7GpppX diphosphatase	21312256	39	1	0.05	2	0.0598
large proline-rich protein BAG6 isoform 1	33147082	121	1	0.024	4	0.0598
leukotriene A-4 hydrolase	116734870	69	1	0.029	3	0.0596
puromycin-sensitive aminopeptidase	68226731	103	1	0.028	1	0.0595
lupus La protein homolog	158636012	48	1	0.039	4	0.0594
cytoskeleton-associated protein 4	62526118	64	1	0.026	1	0.0594
selenocysteine lyase	27804323	47	1	0.021	1	0.0591
heat shock protein 105	114145505	96	2	0.047	2	0.0591
cAMP-dependent protein kinase catalytic subunit beta isoform 4	255958156	46	1	0.048	1	0.0591
platelet-activating factor acetylhydrolase IB subunit beta	40254624	26	1	0.087	1	0.0589
calcyclin-binding protein	33468885	27	1	0.039	2	0.0589
vesicular integral-membrane protein VIP36 precursor	34328278	40	1	0.034	2	0.0586
plasma membrane calcium-transporting ATPase 1	62234487	135	2	0.016	3	0.0582
NAD(P)H-hydrate epimerase precursor	21553309	31	2	0.11	2	0.0583
ATP-binding cassette sub-family F member 1	39930335	95	1	0.011	1	0.0582
OCIA domain-containing protein 2	58219050	17	1	0.065	1	0.0585
aldo-keto reductase family 1, member C19	282398141	37	1	0.037	1	0.058
serine/threonine-protein kinase VRK1 isoform c	71067120	45	2	0.12	3	0.0578
mannose-1-phosphate guanyltransferase beta	29244556	40	4	0.18	11	0.0579
nardilysin precursor	31559918	133	1	0.01	1	0.0577
GCN1 general control of amino-acid synthesis 1-like 1	112807186	293	3	0.016	4	0.0577
eukaryotic translation initiation factor 3 subunit K isoform 1	21312044	25	1	0.069	2	0.0579
estradiol 17-beta-dehydrogenase 12	9789991	35	2	0.099	3	0.0576
RNA-binding protein 39 isoform a	118403314	59	1	0.032	2	0.0573
coronin-7	148747331	101	2	0.06	3	0.0572
phosphoribosyl pyrophosphate synthase-associated protein 1	254540089	42	1	0.039	1	0.0571
60S ribosomal protein L35a	15042947	13	1	0.055	2	0.0573
eukaryotic translation initiation factor 3 subunit M	21703762	43	2	0.051	2	0.0568
splicing factor U2AF 35 subunit isoform 1	254939694	28	1	0.059	2	0.0564
26S proteasome non-ATPase regulatory subunit 13	6755210	43	2	0.048	3	0.0562
structural maintenance of chromosomes protein 2	62990166	134	1	0.017	1	0.0562
26S proteasome non-ATPase regulatory subunit 12	13385384	53	1	0.024	1	0.056
protein SEC13 homolog	29150272	36	4	0.24	6	0.0558
FACT complex subunit SSRP1	111154063	81	1	0.032	2	0.0558
Sec24 related gene family, member C isoform 1	269954698	119	3	0.053	5	0.0555
uridine 5'-monophosphate synthase	33859498	52	3	0.18	7	0.0549
nucleolar RNA helicase 2	72384374	94	3	0.062	3	0.0548
clathrin light chain A isoform a	122939192	24	1	0.032	2	0.055
casein kinase II subunit beta isoform 2	7106277	25	1	0.051	1	0.055
ubiquitin-conjugating enzyme E2 D2	9910600	17	2	0.29	6	0.0552
eukaryotic translation initiation factor 4B	167234372	69	1	0.026	2	0.0547
centromere/kinetochore protein zw10 homolog	22165349	88	1	0.026	3	0.0546
aldose reductase	160707894	36	1	0.038	1	0.0545
26S protease regulatory subunit 8	7110703	46	1	0.03	3	0.0542
manganese-transporting ATPase 13A1	283135194	132	1	0.013	2	0.0541
cytoplasmic dynein 1 light intermediate chain 1	22122795	57	2	0.069	2	0.0539
WD repeat-containing protein 1	6755995	66	1	0.036	1	0.0538
TAR DNA-binding protein 43 isoform 1	21704096	45	1	0.087	2	0.0537
aminopeptidase B isoform 1	227499103	72	2	0.062	2	0.0537
V-type proton ATPase subunit d 1	31981304	40	2	0.097	3	0.0533
eukaryotic translation initiation factor 3 subunit I	9055370	36	2	0.12	3	0.053
E3 ubiquitin-protein ligase NEDD4	56699423	103	1	0.024	1	0.0526
phosphatidylinositol transfer protein beta isoform isoform 2	9790159	31	1	0.033	2	0.0523
condensin complex subunit 1	22165392	156	1	0.013	2	0.0525
N(4)-(beta-N-acetylglucosaminyl)-L-asparaginase isoform 1 precursor	54292135	37	1	0.032	1	0.0524
aspartyl aminopeptidase isoform b	161016820	52	5	0.22	9	0.0521
cysteine and histidine-rich domain-containing protein 1	13385324	37	1	0.045	1	0.052
nuclear pore complex protein Nup93	27369533	93	1	0.0098	1	0.0519
AP-2 complex subunit alpha-2	163644277	104	2	0.048	2	0.0519
importin-9	112734861	116	2	0.027	5	0.0517
cathepsin B preproprotein	6681079	37	3	0.12	4	0.0515
SUMO-conjugating enzyme UBC9	294862305	18	1	0.2	1	0.0513
ribonucleoprotein PTB-binding 1	29789209	79	1	0.015	1	0.0507
pre-mRNA-processing factor 19 isoform 2	19527358	55	3	0.11	4	0.0507
grpE protein homolog 1, mitochondrial precursor	13277394	24	1	0.041	1	0.0509
26S proteasome non-ATPase regulatory subunit 9	119508441	25	1	0.05	1	0.0506
ubiquitin-like modifier-activating enzyme 5	227499242	45	1	0.062	3	0.0503
dolichyl-diphosphooligosaccharide--protein glycosyltransferase 48 subunit precursor	46195798	49	1	0.032	1	0.0499
SEC24 related gene family, member D	46560565	113	5	0.083	9	0.0491
putative adenosylhomocysteinase 2	27734986	59	4	0.14	6	0.049
neuronal migration protein doublecortin isoform c	46575788	40	1	0.039	2	0.0489
armadillo repeat-containing protein 10	13385536	33	4	0.21	6	0.0489
small nuclear ribonucleoprotein-associated protein N	133725810	25	1	0.029	1	0.0488
serrate RNA effector molecule homolog isoform 1	13937395	100	2	0.019	2	0.0487
asparagine synthetase [glutamine-hydrolyzing]	33469123	64	3	0.096	7	0.0487
transmembrane emp24 protein transport domain containing 7 precursor	255003819	25	2	0.11	4	0.0486
nmrA-like family domain-containing protein 1 isoform 1	24431937	34	1	0.052	4	0.0485
cell cycle and apoptosis regulator protein 2	226958577	103	1	0.011	2	0.0484
actin-related protein 3	23956222	47	6	0.28	6	0.0485
mannose-1-phosphate guanyltransferase alpha	19526884	46	3	0.15	4	0.0482
elongation factor 1-delta isoform a	56699438	73	1	0.017	1	0.048
mitotic checkpoint protein BUB3	31560618	37	1	0.04	1	0.0478
cytochrome b-c1 complex subunit 1, mitochondrial precursor	46593021	53	3	0.094	7	0.0477
inosine triphosphate pyrophosphatase	31982664	22	2	0.22	4	0.0478
4-aminobutyrate aminotransferase, mitochondrial isoform 2 precursor	283483966	50	1	0.032	1	0.0476
tubulin--tyrosine ligase-like protein 12	269954711	74	1	0.039	2	0.0475
delta-aminolevulinic acid dehydratase	34328485	36	1	0.03	1	0.0476
probable ATP-dependent RNA helicase DDX6	161016793	54	1	0.021	2	0.0474
gephyrin isoform 2	269973915	83	3	0.075	4	0.0475
NEDD8-conjugating enzyme Ubc12 isoform 1	21704162	21	2	0.15	2	0.0474
elongator complex protein 1	158937298	150	1	0.011	1	0.0472
syntaxin-binding protein 1 isoform a	165972307	69	1	0.033	2	0.0469
CTP synthase 2 isoform a	270483771	66	2	0.046	2	0.0466
phosphoglycolate phosphatase	40254507	35	3	0.17	5	0.0467
NADH-cytochrome b5 reductase 1	21312524	34	1	0.059	2	0.0466
macrophage migration inhibitory factor	6754696	13	1	0.078	3	0.047
dehydrogenase/reductase SDR family member 7 precursor	226958616	38	1	0.095	2	0.0465
actin-related protein 2/3 complex subunit 1A	9790221	42	2	0.11	2	0.0465
histone deacetylase 6	194353997	126	5	0.1	6	0.0459
4-trimethylaminobutyraldehyde dehydrogenase precursor	115334671	56	4	0.15	6	0.0459
ATP-binding cassette sub-family E member 1	114205431	67	2	0.042	2	0.0458
protein transport protein Sec23A isoform X1	568979157	86	2	0.048	3	0.0456
glutaminyl-tRNA synthetase isoform 1	269954677	88	1	0.014	1	0.0451
ATP-binding cassette sub-family C member 8 isoform X8	568947584	177	2	0.021	3	0.0449
D-3-phosphoglycerate dehydrogenase	52353955	57	3	0.081	6	0.0446
trifunctional purine biosynthetic protein adenosine-3 isoform X1	568997281	108	1	0.021	1	0.0442
NADH dehydrogenase [ubiquinone] 1 beta subcomplex subunit 9	29789148	22	2	0.13	2	0.0441
metallothionein-1	7305285	6	1	0.2	2	0.0402
importin-4	19745156	119	3	0.029	4	0.0431
heterogeneous nuclear ribonucleoprotein D-like	148664250	46	1	0.06	2	0.0428
glucosamine 6-phosphate N-acetyltransferase isoform X1	568988218	21	2	0.26	4	0.0429
retinol dehydrogenase 11 precursor	19482172	35	1	0.047	2	0.0427
protein ERGIC-53 precursor	21312570	58	1	0.062	2	0.0426
eukaryotic translation initiation factor 2 subunit 2	14149756	38	1	0.036	1	0.0426
DNA (cytosine-5)-methyltransferase 3A isoform 1	418203928	102	1	0.023	1	0.0425
cytosol aminopeptidase	255069715	56	1	0.023	1	0.0424
ubiquitin carboxyl-terminal hydrolase 14 isoform 2	84452155	52	1	0.063	2	0.0423
eukaryotic translation initiation factor 4H	15808988	27	1	0.056	1	0.0423
rho GTPase-activating protein 1 isoform 2	225543420	50	1	0.018	2	0.0421
secretogranin-1 precursor	6680934	78	1	0.018	3	0.042
NADH dehydrogenase [ubiquinone] iron-sulfur protein 2, mitochondrial precursor	23346461	53	1	0.017	1	0.0419
NADH dehydrogenase [ubiquinone] flavoprotein 1, mitochondrial precursor	19526814	51	2	0.091	2	0.0418
V-type proton ATPase subunit C 1	189339262	44	1	0.052	2	0.0415
COP9 signalosome complex subunit 6	33563284	36	1	0.049	2	0.0416
glucosamine-6-phosphate isomerase 1	188219582	33	1	0.062	1	0.0415
cytochrome c1, heme protein, mitochondrial	13385006	35	2	0.11	3	0.0415
acyl-protein thioesterase 1	6678760	25	1	0.061	2	0.0411
protein transport protein Sec24B isoform X1	568924855	140	1	0.015	1	0.0422
PHD finger-like domain-containing protein 5A	24415990	12	1	0.14	2	0.041
L-lactate dehydrogenase A chain isoform 1	6754524	36	1	0.036	2	0.0406
ATPase Asna1	12025542	39	1	0.037	2	0.0405
elongator complex protein 2	134032030	93	1	0.0096	2	0.0402
alpha-1,3/1,6-mannosyltransferase ALG2	172072657	47	2	0.067	4	0.04
basic leucine zipper and W2 domain-containing protein 1	13385296	48	1	0.062	3	0.0399
tubulin-folding cofactor B	170650659	27	1	0.074	2	0.0399
arsenite methyltransferase	119392105	42	1	0.029	2	0.0398
cullin-3	7710014	89	1	0.017	2	0.0395
protein disulfide-isomerase A5 precursor	30794140	59	2	0.041	2	0.0392
eukaryotic translation initiation factor 2 subunit 3, X-linked	6753738	51	2	0.047	3	0.0392
alcohol dehydrogenase class-3 isoform 1	31982511	40	1	0.04	1	0.0391
heat shock protein 75 , mitochondrial precursor	13385998	80	1	0.014	1	0.0387
centromere protein V	225703070	28	1	0.04	1	0.0386
long-chain-fatty-acid--CoA ligase 4 isoform 1	46518528	79	1	0.018	1	0.0384
regulator of nonsense transcripts 1 isoform b	170784811	123	1	0.0072	1	0.0383
mitotic spindle assembly checkpoint protein MAD2A	31543218	24	2	0.22	3	0.0385
diphosphoinositol polyphosphate phosphohydrolase 3-alpha isoform X1	569008585	19	1	0.043	1	0.0385
neuroendocrine convertase 2 precursor	6679229	71	1	0.02	1	0.0381
Golgi-specific brefeldin A-resistance guanine nucleotide exchange factor 1	52138536	207	3	0.047	3	0.0382
transcriptional activator protein Pur-beta	6755252	34	1	0.028	2	0.0353
E2/E3 hybrid ubiquitin-protein ligase UBE2O	50234896	141	1	0.011	1	0.0378
minor histocompatibility antigen H13 isoform 2	18034682	42	1	0.063	2	0.0377
DNA-(apurinic or apyrimidinic site) lyase isoform X1	568986519	35	2	0.12	2	0.0378
glyoxalase domain-containing protein 4	255003777	33	1	0.027	1	0.0377
cleft lip and palate transmembrane protein 1 homolog	103472025	75	2	0.032	4	0.0374
heterogeneous nuclear ribonucleoprotein H isoform X1	568975110	51	4	0.093	6	0.0373
NADP-dependent malic enzyme isoform 1	162139827	64	2	0.084	5	0.037
DNA topoisomerase 1	112734855	91	2	0.022	3	0.037
serine/threonine-protein phosphatase 6 catalytic subunit	21312758	35	1	0.043	1	0.0368
nuclear cap-binding protein subunit 1	144922627	92	1	0.025	1	0.0365
proteasome assembly chaperone 1	9506555	33	1	0.048	2	0.0363
protein transport protein Sec61 subunit alpha isoform 1	8394252	52	1	0.042	3	0.0362
RNA-binding protein 47 isoform a	188497698	64	1	0.02	1	0.036
chromodomain-helicase-DNA-binding protein 4	39204553	218	1	0.0084	1	0.036
hsc70-interacting protein	19526912	42	1	0.046	1	0.0356
protein RCC2	33239431	56	2	0.046	2	0.0356
thioredoxin reductase 1, cytoplasmic isoform 2	110224442	55	1	0.052	1	0.0353
NHP2-like protein 1	377837185	14	1	0.13	2	0.0352
mitochondrial glutamate carrier 1	21311845	35	1	0.046	2	0.0348
GMP reductase 1	17975500	37	2	0.064	2	0.0347
Golgi apparatus protein 1 precursor	6677905	134	5	0.043	6	0.0345
transmembrane 9 superfamily member 4 precursor	31542095	75	1	0.026	2	0.0341
protein kinase C alpha type	164663791	77	2	0.034	2	0.0339
synaptotagmin-like protein 4 isoform X1	569011369	76	1	0.019	1	0.0338
AP-3 complex subunit mu-1	254281313	47	1	0.029	1	0.0337
COP9 signalosome complex subunit 3	6753488	48	1	0.047	4	0.0333
acidic leucine-rich nuclear phosphoprotein 32 family member A	40254600	29	1	0.065	2	0.0333
plastin-3 isoform X1	569009527	72	1	0.051	1	0.0331
major vault protein isoform X1	755523315	96	1	0.013	1	0.033
aminoacyl tRNA synthase complex-interacting multifunctional protein 2 isoform 1	288541337	35	1	0.05	1	0.0328
tubulin alpha-1B chain	34740335	50	2	0.36	3	0.0321
guanine nucleotide-binding protein G(i) subunit alpha-2	41054806	40	3	0.15	5	0.032
sodium/potassium-transporting ATPase subunit beta-1	6753138	35	1	0.043	1	0.0319
importin subunit alpha-1	6754474	58	3	0.12	4	0.0316
NADH dehydrogenase [ubiquinone] iron-sulfur protein 7, mitochondrial precursor	21312950	25	1	0.12	2	0.0317
acid ceramidase precursor	9790019	45	1	0.023	1	0.0316
presequence protease, mitochondrial precursor	21699068	117	2	0.041	3	0.0313
COP9 signalosome complex subunit 2 isoform a	551895128	52	2	0.093	3	0.0313
eukaryotic translation initiation factor 4E	83627717	25	1	0.051	1	0.0312
basigin isoform 2 precursor	116014342	30	1	0.055	1	0.0311
protein arginine N-methyltransferase 5	188528624	73	2	0.08	2	0.031
endoplasmic reticulum-Golgi intermediate compartment protein 1	13385678	33	1	0.034	1	0.031
phosphoacetylglucosamine mutase isoform 1	255522939	59	2	0.039	3	0.0309
guanine nucleotide-binding protein G(I)/G(S)/G(T) subunit beta-1	229608938	37	5	0.27	7	0.0308
isocitrate dehydrogenase [NAD] subunit gamma 1, mitochondrial isoform X1	569009751	42	1	0.059	1	0.0307
N-acylneuraminate cytidylyltransferase	247269309	48	1	0.037	2	0.0306
ER membrane protein complex subunit 1 isoform 1 precursor	31542273	112	1	0.016	1	0.0305
replication protein A 32 subunit	110625961	29	1	0.085	3	0.0305
tropomyosin alpha-4 chain	47894398	28	1	0.081	1	0.0302
26S proteasome non-ATPase regulatory subunit 4 isoform 1	530537251	41	2	0.061	2	0.0302
platelet-activating factor acetylhydrolase IB subunit alpha	7305363	47	1	0.027	2	0.0301
aldo-keto reductase family 1, member C12	85719330	37	1	0.053	1	0.0301
succinyl-CoA ligase [ADP-forming] subunit beta, mitochondrial isoform X1	568987140	54	2	0.044	3	0.03
transformer-2 protein homolog beta isoform X1	568994802	34	1	0.073	1	0.0298
secernin-1	38044104	46	3	0.097	9	0.0298
synaptophysin	166235165	34	2	0.057	5	0.0296
Golgi reassembly-stacking protein 2	224967109	47	2	0.071	3	0.0293
fragile X mental retardation syndrome-related protein 2	83921589	74	1	0.019	1	0.0293
phosphoribosyl pyrophosphate amidotransferase	26024309	57	1	0.029	1	0.029
DNA (cytosine-5)-methyltransferase 1 isoform 1	327180732	183	1	0.0099	2	0.0288
dehydrogenase/reductase SDR family member 1	31980844	34	2	0.07	3	0.0287
ADP-ribosylation factor-like protein 2	31980988	21	1	0.14	1	0.0288
eukaryotic peptide chain release factor subunit 1	124286826	49	2	0.076	2	0.0282
catenin beta-1	260166642	85	4	0.061	5	0.0259
UDP-N-acetylhexosamine pyrophosphorylase-like protein 1	84794548	57	1	0.039	1	0.0278
dnaJ homolog subfamily A member 2	9789937	46	1	0.036	2	0.0278
protein PRRC1	110625811	46	1	0.038	3	0.0275
hsp70-binding protein 1	13195602	39	2	0.092	3	0.0273
lysosomal protective protein isoform X1	755498933	56	2	0.049	2	0.0272
COP9 signalosome complex subunit 7a isoform 2	255760052	30	1	0.051	3	0.027
EKC/KEOPS complex subunit Tprkb	281427253	20	1	0.063	1	0.027
beta-catenin-like protein 1	254540032	65	1	0.027	1	0.027
transmembrane protein 214	31559970	76	1	0.02	1	0.0265
serine/threonine-protein phosphatase 5	199559777	57	1	0.024	1	0.0265
arpin	47498088	25	1	0.058	3	0.0265
voltage-dependent anion-selective channel protein 3 isoform 2	6755967	31	1	0.039	1	0.0265
lanosterol 14-alpha demethylase	71061451	57	1	0.042	2	0.0263
FAS-associated factor 2	158533976	52	1	0.034	1	0.0257
tubulin beta-6 chain	27754056	50	1	0.038	1	0.0256
adenylosuccinate lyase	29788764	55	1	0.05	2	0.0255
lysosome membrane protein 2 precursor	6680878	54	1	0.027	1	0.0254
proteasome-associated protein ECM29 homolog	37718970	204	4	0.04	6	0.0254
bifunctional purine biosynthesis protein PURH	227908823	64	2	0.068	3	0.0253
SUMO-activating enzyme subunit 1 isoform a	552953709	39	1	0.031	2	0.0252
mitochondrial Rho GTPase 1 isoform 2	254039727	76	1	0.014	1	0.0252
ubiquitin-like modifier-activating enzyme 6	27370032	118	3	0.06	6	0.025
cell differentiation protein RCD1 homolog	10946722	34	1	0.06	1	0.025
oxidoreductase HTATIP2 isoform a precursor	225690589	30	1	0.047	1	0.0248
apoptotic chromatin condensation inducer in the nucleus isoform 2	146231985	151	1	0.013	3	0.0246
tubulin alpha-4A chain isoform X1	568907654	48	2	0.33	2	0.0244
interleukin enhancer-binding factor 3 isoform 1	111607430	98	2	0.021	2	0.0241
ataxin-10	83649709	54	1	0.042	1	0.0241
oligosaccharyltransferase complex subunit OSTC	13384930	17	1	0.081	2	0.0242
tRNA-dihydrouridine(47) synthase [NAD(P)(+)]-like	255003775	71	1	0.024	2	0.0238
cation-dependent mannose-6-phosphate receptor precursor	14916479	31	1	0.05	1	0.0239
tubulin-specific chaperone D	28077067	133	3	0.037	4	0.0237
importin subunit alpha-4	6680596	58	2	0.075	3	0.0237
eukaryotic translation initiation factor 5B isoform X1	568906221	137	2	0.018	2	0.0234
transmembrane 9 superfamily member 3 precursor	19111162	68	2	0.037	4	0.0232
mitogen-activated protein kinase 3	21489933	43	2	0.063	4	0.0232
ATP-dependent RNA helicase DDX50	16716475	82	1	0.015	1	0.0228
transformer-2 protein homolog alpha	111160869	33	1	0.074	1	0.0226
N-terminal kinase-like protein	12963867	89	1	0.019	1	0.0227
steroid receptor RNA activator 1 isoform a	257096048	26	1	0.034	1	0.0226
splicing factor U2AF 65 subunit isoform 2	164565377	53	1	0.019	1	0.0224
short/branched chain specific acyl-CoA dehydrogenase, mitochondrial	17647119	48	2	0.069	4	0.0224
sphingosine kinase 2	289191399	66	1	0.016	1	0.0221
enhancer of mRNA-decapping protein 4 isoform 2	31712002	151	1	0.021	1	0.0219
valacyclovir hydrolase precursor	21624609	33	1	0.12	1	0.0217
alpha-N-acetylgalactosaminidase precursor	168693635	47	2	0.036	3	0.0212
UV excision repair protein RAD23 homolog B	171906578	44	1	0.043	1	0.0212
prolactin regulatory element-binding protein isoform 1	158749640	45	1	0.046	4	0.0211
X-ray repair cross-complementing protein 5	160333605	83	1	0.011	1	0.0207
uroporphyrinogen-III synthase isoform X2	568950119	29	1	0.11	1	0.0208
nitrilase homolog 1 isoform 2	336088630	32	1	0.059	2	0.0207
inositol-3-phosphate synthase 1	12963757	61	1	0.014	1	0.0206
coronin-1C	31542413	53	1	0.027	1	0.0204
5'-AMP-activated protein kinase subunit gamma-1	124107596	38	1	0.088	1	0.0204
Golgin subfamily A member 2 isoform b	124378030	113	1	0.016	2	0.0203
acetoacetyl-CoA synthetase	21313520	75	1	0.04	1	0.0203
DNA polymerase delta catalytic subunit	254587977	124	1	0.014	1	0.0202
histone deacetylase 1	6680193	55	2	0.081	3	0.0201
host cell factor 1	34328130	210	1	0.0044	1	0.0198
ATP-dependent RNA helicase DDX19A	170932536	54	1	0.052	1	0.0199
pyruvate kinase PKM isoform M1	359807367	58	1	0.25	3	0.0192
DNA-directed RNA polymerase II subunit RPB3	29336059	31	1	0.091	1	0.0191
NADH dehydrogenase [ubiquinone] 1 alpha subcomplex subunit 11	226437665	15	3	0.51	4	0.0378
multifunctional protein ADE2	13385434	47	3	0.2	5	0.0187
hsp90 co-chaperone Cdc37	7949018	45	1	0.032	1	0.0186
exportin-5	24429570	137	2	0.02	2	0.0185
ATP-dependent RNA helicase DDX39A	38372907	49	1	0.1	2	0.0186
protein phosphatase methylesterase 1	30794138	42	1	0.034	2	0.0183
gamma-glutamylaminecyclotransferase	21703924	17	1	0.17	2	0.0181
sulfite oxidase, mitochondrial precursor	74024924	61	1	0.02	4	0.0177
ufm1-specific protease 2 isoform X1	568954601	40	1	0.029	1	0.0162
MMS19 nucleotide excision repair protein homolog	15100156	113	1	0.018	1	0.0177
acetyl-coenzyme A transporter 1	31543730	61	1	0.016	1	0.0176
proteasomal ubiquitin receptor ADRM1	31981027	42	1	0.02	2	0.0173
mitogen-activated protein kinase 1 isoform X1	568995370	41	1	0.15	1	0.0172
dynactin subunit 4	13385798	52	1	0.022	1	0.0172
annexin A7	160707956	50	2	0.054	2	0.0171
phospholipid hydroperoxide glutathione peroxidase, nuclear isoform 1	90903233	29	1	0.043	2	0.0169
ganglioside-induced differentiation-associated protein 1-like 1	160420342	42	1	0.082	1	0.0168
COP9 signalosome complex subunit 1 isoform 1	295424137	59	1	0.038	1	0.0154
guanine nucleotide-binding protein G(k) subunit alpha	33563256	41	2	0.15	2	0.0153
zinc finger protein 330	21704208	36	1	0.035	1	0.0255
vitamin K epoxide reductase complex subunit 1 precursor	30519915	18	2	0.11	4	0.0152
GTPase HRas isoform 1	194363764	21	1	0.079	1	0.0152
serum albumin precursor	163310765	69	1	0.023	3	0.0148
cullin-4A	167466258	88	1	0.022	1	0.0147
protein NipSnap homolog 1 isoform X1	568969995	34	1	0.1	1	0.0146
transgelin-3	9790125	22	1	0.1	1	0.0145
protein GNAS isoform XLas	47271396	122	3	0.034	3	0.0145
CLIP-associating protein 2 isoform X1	568964384	170	1	0.019	1	0.0186
WD40 repeat-containing protein SMU1	227430367	58	1	0.025	1	0.0142
neuroblastoma-amplified protein	255003837	266	1	0.011	2	0.046
echinoderm microtubule-associated protein-like 2 isoform X5	755520138	69	2	0.047	2	0.014
6-phosphofructo-2-kinase/fructose-2,6-bisphosphatase 2 isoform 2	241666427	55	1	0.019	1	0.0137
zinc finger protein-like 1 isoform X2	569006038	28	1	0.06	1	0.0136
2-amino-3-ketobutyrate coenzyme A ligase, mitochondrial isoform a	240120117	45	2	0.084	4	0.0136
ubiquitin carboxyl-terminal hydrolase 7	154146209	128	1	0.014	1	0.0135
nucleoporin SEH1 isoform b	20532338	39	1	0.039	2	0.0134
N-alpha-acetyltransferase 25, NatB auxiliary subunit	55742803	112	1	0.032	1	0.0305
transducin beta-like protein 2 precursor	31543845	50	4	0.093	6	0.0128
calcium-dependent secretion activator 1 isoform X3	568985444	156	1	0.018	1	0.0128
transmembrane 9 superfamily member 2 precursor	188528894	75	3	0.077	6	0.166
metallothionein-3	7305287	7	2	0.38	3	0.012
dystonin isoform 1	454525117	871	1	0.0026	2	0.0116
RNA polymerase II subunit A C-terminal domain phosphatase SSU72	172088095	23	2	0.1	2	0.0111
epithelial cell adhesion molecule precursor	112293275	35	1	0.038	1	0.0109
ras-related protein Rab-35	37718983	23	1	0.09	2	0.0108
probable ATP-dependent RNA helicase DDX46	530585119	117	1	0.011	1	0.0198
myotubularin-related protein 7	103472017	76	1	0.026	1	0.0105
leucine carboxyl methyltransferase 1	42794773	38	1	0.027	2	0.0411
condensin complex subunit 2	295389521	82	1	0.034	2	0.0102
translocation protein SEC62	39930429	46	1	0.023	2	0.0101
5'-AMP-activated protein kinase catalytic subunit alpha-1	94681061	64	1	0.025	1	0.0101
mannose-6-phosphate isomerase isoform X1	568960659	27	1	0.061	2	0.00993
acetyl-CoA acetyltransferase, cytosolic	148747461	41	1	0.063	1	0.00987
fatty-acid amide hydrolase 1	226443015	63	1	0.029	1	0.00977
cell division cycle and apoptosis regulator protein 1	33563288	132	1	0.02	2	0.00974
actin-related protein 10	226246593	46	3	0.16	7	0.00968
methylosome protein 50	19263322	37	3	0.15	3	0.00945
vitamin K epoxide reductase complex subunit 1-like protein 1 isoform 1	46309457	20	1	0.057	1	0.0093
ATP-dependent RNA helicase DHX36	240848573	114	1	0.013	2	0.00929
twinfilin-2	6755224	39	1	0.049	2	0.00926
N-alpha-acetyltransferase 50	21312422	19	1	0.077	1	0.00916
protein odr-4 homolog isoform 1	116805315	50	1	0.056	1	0.00903
E3 ubiquitin-protein ligase UBR4	237820660	572	4	0.014	5	0.00898
importin subunit alpha-7 isoform X1	568928522	61	3	0.072	5	0.00896
bifunctional 3'-phosphoadenosine 5'-phosphosulfate synthase 1 isoform a	6754982	71	1	0.056	2	0.022
NEDD8-activating enzyme E1 catalytic subunit isoform 1	162135936	52	1	0.022	1	0.00874
lipopolysaccharide-responsive and beige-like anchor protein isoform beta	117956397	309	1	0.0047	1	0.0598
galectin-3-binding protein precursor	6755144	64	1	0.028	1	0.00866
carbohydrate-responsive element-binding protein	34328263	95	1	0.028	1	0.00861
myosin-10	33598964	229	1	0.025	1	0.00847
AP-3 complex subunit beta-1	163310776	123	1	0.012	1	0.00842
structural maintenance of chromosomes flexible hinge domain-containing protein 1	148839318	226	1	0.006	1	0.00834
ubiquitin conjugation factor E4 B	172073169	133	1	0.023	1	0.00793
histone acetyltransferase type B catalytic subunit	28076885	49	2	0.072	3	0.00777
replication factor C subunit 3	124249204	41	1	0.051	1	0.00771
importin-11	31541898	112	1	0.019	1	0.00763
rab3 GTPase-activating protein catalytic subunit	158966667	110	1	0.017	1	0.00758
isoleucine--tRNA ligase, mitochondrial precursor	38490690	113	3	0.058	4	0.00735
serine protease 53 precursor	124486911	59	2	0.065	3	0.00732
E3 SUMO-protein ligase RanBP2	153792534	341	1	0.0036	2	0.00731
tyrosine-protein kinase BAZ1B	170295818	171	1	0.02	1	0.00723
adenosine kinase isoform 2	339895909	38	1	0.038	1	0.00702
exportin-7	12746422	124	1	0.015	2	0.00684
endoplasmic reticulum lectin 1 precursor	114205437	55	1	0.048	2	0.00669
sister chromatid cohesion protein PDS5 homolog B isoform X1	568939230	165	1	0.0083	1	0.00642
rabankyrin-5	85702366	129	1	0.019	1	0.00636
ovarian cancer-associated gene 2 protein homolog	18158418	24	1	0.049	1	0.0061
F-box only protein 22	139948465	44	1	0.05	1	0.00603
propionyl-CoA carboxylase beta chain, mitochondrial precursor	13385310	58	1	0.057	2	0.00597
glucose-6-phosphatase 3	47271524	39	1	0.043	1	0.00595
ZW10 interactor	21326440	29	1	0.14	2	0.00544
zinc transporter 7	12963579	42	1	0.04	1	0.00544
N-terminal EF-hand calcium-binding protein 2	16905129	43	1	0.023	1	0.00529
dedicator of cytokinesis protein 7 isoform X2	568929557	243	1	0.0075	1	0.00504
CUGBP Elav-like family member 1 isoform 2	349585220	52	2	0.041	3	0.00499
glucosylceramidase precursor	116734815	58	1	0.06	2	0.00471
fibronectin type-III domain-containing protein 3A isoform X1	568987892	132	1	0.0092	1	0.189
anamorsin	19527376	33	1	0.036	1	0.00444
ubiquitin-protein ligase E3A isoform X1	568947690	100	2	0.054	2	0.00428
geranylgeranyl transferase type-2 subunit alpha isoform X1	568988256	65	1	0.032	1	0.00427
dual specificity mitogen-activated protein kinase kinase 4	22095023	44	1	0.04	1	0.00407
argininosuccinate synthase	6996911	47	1	0.046	1	0.00392
acyl-CoA dehydrogenase family member 9, mitochondrial	100817933	69	1	0.016	1	0.00388
NHL repeat-containing protein 2	29789158	78	1	0.046	1	0.00384
phosphomevalonate kinase isoform 1	254588056	22	1	0.052	1	0.00375
bone morphogenetic protein 1 precursor	42734447	112	1	0.022	1	0.00375
diacylglycerol kinase epsilon isoform X1	755470067	50	1	0.03	1	0.00368
tubulin gamma-1 chain	19527242	51	2	0.12	2	0.00358
glycolipid transfer protein	31560404	24	1	0.14	2	0.00345
THUMP domain-containing protein 3 isoform X1	568940742	56	1	0.02	1	0.0032
copine-1	25141330	59	1	0.037	1	0.00301
E3 ubiquitin-protein ligase HUWE1	146231996	483	2	0.011	2	0.00255
probable cytosolic iron-sulfur protein assembly protein CIAO1	31542399	38	2	0.091	3	0.00202
C-terminal-binding protein 1 isoform 1	311893324	48	1	0.075	2	0.00184
abhydrolase domain-containing protein 15 precursor	147902337	51	2	0.083	2	0.00176
signal recognition particle 9 protein	6755662	10	1	0.13	1	ni
RAP1, GTP-GDP dissociation stimulator 1 isoform a	100818161	66	3	0.1	4	ni
myotrophin	6679961	13	2	0.34	4	ni
muscleblind-like protein 1 isoform X1	568923410	47	1	0.018	1	ni
insulin-2 preproprotein	297374794	12	3	0.36	32	ni
cytochrome c oxidase subunit 6B1	13385090	10	2	0.29	6	ni
CST complex subunit CTC1 isoform a	219689064	134	2	0.04	2	ni
CDGSH iron-sulfur domain-containing protein 3, mitochondrial isoform X1	568973327	24	1	0.037	1	ni
barrier-to-autointegration factor	557636704	10	2	0.29	4	ni
alpha-crystallin A chain isoform 3	514825575	20	1	0.064	2	ni

## Sheet: Sulfhydrome from adATF4 MIN6
Protein name	Gene ID	Accessions	MH+ [Da]	Cys-containing peptide Sequence	H/L ratio	Xcorr	relative abundance (NSAF)
legumain precursor	Lgmn	7242187	1792.88	HQADACHAYQIIHR	-	2.53	0.00344
tumor suppressor p53-binding protein 1 isoform X7	Trp53bp1	568917333	1577.75	ADVSCEPLEEVEK	2.924	3.84	0.00515
ADP-dependent glucokinase isoform X1	Adpgk	568962117	1780.86	VAGTQACATETIDTNR	2.132	5.25	0.00533
catenin alpha-2 isoform X3	Ctnna2	568940495	1099.56	IVAECNAVR	1.98	2.31	0.00663
cleavage and polyadenylation specificity factor subunit 2 isoform X1	Cpsf2	568980060	1551.82	HLSLCHGLSDLAR	1.693	2.87	0.00778
serine protease 53 isoform X1	Prss53	568950899	1802.88	LISRPTCNCLYNR	-	3.24	0.00798
ran-binding protein 9	Ranbp9	161353515	1362.69	QLCGGSQAAIER	1.915	2.51	0.00855
A-kinase anchor protein SPHKAP	Sphkap	170014712	1395.7	TQTLCTESVQR	2.113	2.58	0.00857
kinesin light chain 1 isoform 1A	Klc1	131412198	1314.63	LCQENQWLR	1.602	2.29	0.00869
structural maintenance of chromosomes flexible hinge domain-containing protein 1 isoform X1	Smchd1	569001849	1377.74	ANLGVFTVCAPR	1.566	3.36	0.0091
galectin-3-binding protein isoform X1	Lgals3bp	568972236	1248.62	VDAECMPVVR	2.515	2.75	0.00945
NEDD8-activating enzyme E1 catalytic subunit isoform 4	Uba3	686661126	1388.71	LPEHCIEYVR	1.817	2.95	0.00953
bifunctional 3'-phosphoadenosine 5'-phosphosulfate synthase 1 isoform b	Papss1	575402998	1479.78	GCTVWLTGLSGAGK	1.598	4.31	0.00973
importin subunit alpha-7	Kpna6	227116300	1371.69	NAVWALSNLCR	1.652	3.24	0.00977
E3 ubiquitin-protein ligase UBR4	Ubr4	237820660	1579.74	HNTYLQECTGQR	2.452	3.38	0.00979
microtubule-associated protein 1S isoform X2	Map1s	568955484	1424.74	ALCYVISGQGQR	4.062	2.6	0.00996
CUGBP Elav-like family member 2 isoform 7	Celf2	237757269	1672.79	VMFSPFGQIEECR	2.387	3.31	0.0101
glycylpeptide N-tetradecanoyltransferase 2 isoform c	Nmt2	594150381	1476.74	AMELLSACQGPAR	2.048	3.42	0.0106
kinesin heavy chain isoform 5C	Kif5c	45433560	1305.67	ILQDSLGGNCR	2.277	3.49	0.0106
5'-AMP-activated protein kinase catalytic subunit alpha-1 isoform X1	Prkaa1	568990171	1838.88	TSCGSPNYAAPEVISGR	1.927	4.79	0.011
cytochrome c-type heme lyase isoform X1	Hccs	569011696	1568.71	AYDYVECPVTGAR	1.611	3.77	0.011
pre-mRNA-splicing factor 38A	Prpf38a	227497256	1058.61	VCDIILPR	1.17	2.88	0.0113
sorting and assembly machinery component 50 homolog	Samm50	30519943	1360.67	ICDGVQFGAGIR	1.706	3.53	0.0113
uroporphyrinogen decarboxylase isoform X2	Urod	568928764	1275.59	AAQDFFSTCR	1.923	2.44	0.0122
NEDD8 ultimate buster 1	Nub1	119360354	1810.84	ACDGNVDHAATHISNR	1.732	3.07	0.0124
gamma-interferon-inducible lysosomal thiol reductase precursor	Ifi30	125628657	1378.72	LNMVEACLLDK	-	2.15	0.0127
WD repeat-containing protein 11	Wdr11	227908800	1674.91	TGVPFLQVIPCSQR	1.453	2.71	0.0133
protein TSSC1 isoform X2	Tssc1	568977817	1133.6	VQACAAVWR	2.381	2.17	0.0137
cathepsin L1 isoform X1	Ctsl	568983003	1761.83	DNHCGLATAASYPVVN	2.289	3.39	0.014
2-amino-3-ketobutyrate coenzyme A ligase, mitochondrial isoform b	Gcat	240120119	1263.66	FICGTQSIHK	1.663	2.27	0.0148
transducin (beta)-like 2 isoform X2	Tbl2	568938123	1300.58	FEEASTMPCR	2.805	2.17	0.0149
WD40 repeat-containing protein SMU1	Smu1	227430367	1344.66	NPEHFVVCNR	1.728	2.52	0.0155
guanine nucleotide-binding protein G(k) subunit alpha	Gnai3	33563256	1169.55	DGGVQACFSR	2.297	3.17	0.0167
annexin A7	Anxa7	160707956	1145.55	CYQLEFGR	1.182	2.04	0.0171
probable ubiquitin carboxyl-terminal hydrolase FAF-X isoform X8	Usp9x	569008690	1462.74	VVIQSNDDIACR	3.612	3.34	0.0175
sulfite oxidase, mitochondrial	Suox	74024924	1312.69	LCDVLAQAGHR	1.451	3.47	0.0177
ATP-dependent RNA helicase DDX39A isoform X1	Ddx39	568957494	1360.69	NCPHVVVGTPGR	1.244	3.4	0.0186
CLIP-associating protein 2 isoform X9	Clasp2	568964400	1416.75	IPRPSVSQGCSR	2.085	3.1	0.0186
pyruvate kinase PKM isoform M1	Pkm	359807367	2567.21	AEGSDVANAVLDGADCIMLSGETAK	2.592	5.44	0.0192
protein TSSC4 isoform 1	Tssc4	9938004	2627.15	SQVSHTDYVPSFNQDPSSCGEGR	1.789	5.33	0.0195
host cell factor 1	Hcfc1	34328130	1242.65	AGHCAVAINTR	1.943	2.52	0.0198
SEC16 homolog A isoform X6	Sec16a	568913426	1159.62	FTVPHVCAR	2.198	2.33	0.0198
ATP-dependent RNA helicase DDX19A isoform X1	Ddx19a	568956088	1205.68	VLVTTNVCAR	1.763	2.26	0.0199
UPF0577 protein KIAA1324 isoform X3	5330417C22Rik	568922653	1947.05	VAVPHSPGLCTSLPDPVK	3.118	4.69	0.02
coronin-1C	Coro1c	31542413	1611.77	VTWDSSFCAVNPR	2.36	3.04	0.0204
serine/threonine-protein phosphatase PP1-beta catalytic	Ppp1cb	161484668	1230.58	GNHECASINR	1.181	2.82	0.0206
ADP-ribosylarginine hydrolase	Adprh	6680658	893.48	AMCIGLR	2.083	2.3	0.0207
glutamine synthetase	Glul	31982332	1992.01	RPSANCDPYAVTEAIVR	-	2.39	0.0213
S-methyl-5'-thioadenosine phosphorylase	Mtap	45544618	2055.98	TSLRPQTFYDGSHCSAR	1.893	4.22	0.0213
D-beta-hydroxybutyrate dehydrogenase, mitochondrial precursor	Bdh1	170014720	1735.87	TIQLNVCNSEEVEK	1.698	3.73	0.0218
elongation factor G, mitochondrial	Gfm1	170650599	1866.9	YQPCSPSTQEELINK	2.185	2.27	0.0222
short/branched chain specific acyl-CoA dehydrogenase, mitochondrial	Acadsb	17647119	1153.61	GITCFLVDR	1.775	3.05	0.0224
huntingtin-interacting protein 1-related protein isoform X5	Hip1r	568937294	1357.65	CTSSPDYLVSR	-	2.75	0.0228
transmembrane 9 superfamily member 3 precursor	Tm9sf3	19111162	1357.64	NLSGQPNFPCR	2.184	2.62	0.0232
tubulin-specific chaperone D isoform X5	Tbcd	568971131	1220.65	ICQTVGVNTR	8.212	2.32	0.0237
tubulin beta-4A chain	Tubb4a	31981939	1096.55	TAVCDIPPR	-	2.42	0.0238
cation-dependent mannose-6-phosphate receptor precursor	M6pr	14916479	1122.59	AVVMISCNR	2.004	2.27	0.0239
oligosaccharyltransferase complex subunit OSTC	Ostc	13384930	1496.82	VPFLVLECPNLK	1.413	3.83	0.0242
ubiquitin-like modifier-activating enzyme 6	Uba6	27370032	1334.7	IWSQCVELAR	1.517	2.23	0.025
bifunctional purine biosynthesis protein PURH	Atic	227908823	1410.79	VVVCNLYPFVK	1.673	3.03	0.0253
tubulin beta-6 chain	Tubb6	27754056	1926	EIVHIQAGQCGNQIGTK	1.615	3.25	0.0256
catenin beta-1 isoform X1	Ctnnb1	568963436	1446.77	VAAGVLCELAQDK	1.363	3.16	0.0259
arpin	2610034B18Rik	47498088	1779.9	YYVLYIQPSCIHR	1.436	2.43	0.0265
serine/threonine-protein phosphatase 5	Ppp5c	199559777	1549.71	TECYGYALGDATR	2.442	4.55	0.0265
transmembrane protein 214 isoform X1	Tmem214	568934504	1539.8	SSGLLPVGQQVCAR	1.662	2.35	0.0265
voltage-dependent anion-selective channel protein 3 isoform 2	Vdac3	6755967	1403.71	VCNYGLTFTQK	2.288	3.58	0.0265
developmentally-regulated GTP-binding protein 2 isoform X1	Drg2	568971509	1522.75	VYMPCLYVYNK	2.421	2.52	0.0266
poly(U)-binding-splicing factor PUF60 isoform c	Puf60	257196186	907.5	ALAIMCR	2.409	2.31	0.0266
pyrroline-5-carboxylate reductase 3 isoform X1	Pycrl	568993033	1411.68	AATMSAVEAATCR	2.25	4.05	0.0275
scaffold attachment factor B2 isoform X4	Safb2	569000052	1234.68	ILDILGETCK	1.635	2.46	0.0281
pyridoxal phosphate phosphatase	Pdxp	47059486	1496.76	AEQLFSSALCAAR	1.365	3.1	0.0282
dehydrogenase/reductase SDR family member 1 isoform X1	Dhrs1	568988186	1228.62	LAADCAHELR	2.273	3.03	0.0287
DNA (cytosine-5)-methyltransferase 1 isoform X3	Dnmt1	568958805	1321.6	FTSFSVYCSR	1.794	2.11	0.0288
phosphoribosyl pyrophosphate amidotransferase	Ppat	26024309	1490.77	DPYGNRPLCIGR	1.903	2.42	0.029
heterogeneous nuclear ribonucleoprotein H2 isoform X1	Hnrnph2	569011433	1669.68	DLNYCFSGMSDHR	-	3.2	0.0294
creatine kinase U-type, mitochondrial isoform X1	Ckmt1	568915233	1802.96	LGYILTCPSNLGTGLR	1.224	3.9	0.0295
synaptophysin	Syp	166235165	1631.8	LHQVYFDAPSCVK	1.366	3.66	0.0296
secernin-1 isoform X1	Scrn1	568942798	1894.89	SSPCIHYFTGTPDPSR	1.486	3.21	0.0298
platelet-activating factor acetylhydrolase IB subunit alpha	Pafah1b1	7305363	2430.16	MVRPNQDGTLIASCSNDQTVR	2.364	5.1	0.0301
26S proteasome non-ATPase regulatory subunit 4 isoform 2	Psmd4	6679505	1783.93	LQAQQDAVNIVCHSK	1.913	2.42	0.0302
N-acylneuraminate cytidylyltransferase isoform X1	Cmas	568944119	1603.82	VGLSAVPADACSGAQK	1.692	3.29	0.0306
isocitrate dehydrogenase [NAD] subunit gamma 1, mitochondrial isoform X2	Idh3g	569009753	2727.25	HACVPVDFEEVHVSSNADEEDIR	2.242	5.79	0.0307
guanine nucleotide-binding protein G(I)/G(S)/G(T) subunit beta-1	Gnb1	229608938	1298.65	LFVSGACDASAK	1.906	3.13	0.0308
phosphoacetylglucosamine mutase isoform 2	Pgm3	255522941	1346.7	LNHLCGADFVK	1.749	4.24	0.0309
basigin isoform 2 precursor	Bsg	116014342	1783.88	SGEYSCIFLPEPVGR	2.269	4.17	0.0311
cleavage and polyadenylation specificity factor subunit 3 isoform X2	Cpsf3	568977902	1447.72	FCNTVHDIVNR	1.525	2.57	0.0311
eukaryotic translation initiation factor 4E isoform X2	Eif4e	568921782	1460.69	IAIWTTECENR	2.13	2.93	0.0312
importin subunit alpha-1	Kpna2	6754474	1445.72	NLTWTLSNLCR	-	2.68	0.0316
sodium/potassium-transporting ATPase subunit beta-1	Atp1b1	6753138	1562.81	YNPNVLPVQCTGK	2.581	2.33	0.0319
guanine nucleotide-binding protein G(i) subunit alpha-2 isoform X1	Gnai2	568962761	1589.78	LWADHGVQACFGR	1.984	3.45	0.032
SWI/SNF complex subunit SMARCC2 isoform 3	Smarcc2	37718972	1625.81	LNPQEYLTSTACR	1.933	3.36	0.0323
major vault protein	Mvp	239052674	1388.72	HYCIVANPVSR	2.237	2.67	0.033
calcium/calmodulin-dependent 3',5'-cyclic nucleotide phosphodiesterase 1A isoform PDE1A7	Pde1a	58036491	1676.84	EAELGLPFSPLCDR	1.502	2.92	0.0342
uncharacterized protein FLJ45252 homolog	LOC102637099	568943658	2154.02	LGEAALFSESGVCTEPEER	2.021	5.1	0.0344
Golgi apparatus protein 1 precursor	Glg1	6677905	1069.51	CNVENLPR	1.492	2.28	0.0345
GMP reductase 1	Gmpr	17975500	1262.66	VGVGPGSVCTTR	1.864	2.72	0.0347
mitochondrial glutamate carrier 1 isoform X1	Slc25a22	568952448	1771.76	GVNEDTYSGFLDCAR	2.145	3.69	0.0348
protein RCC2 isoform X1	Rcc2	568930420	1361.65	IEYDCELVPR	2.258	3.25	0.0356
synaptic vesicle membrane protein VAT-1 homolog	Vat1	33859662	1397.68	ACGLNFADLMGR	1.279	3.63	0.0369
DNA topoisomerase 1	Top1	112734855	1254.68	AVAILCNHQR	0.372	2.72	0.037
heterogeneous nuclear ribonucleoprotein H isoform X9	Hnrnph1	568975126	2165.92	YGDGGSTFQSTTGHCVHMR	1.791	3.86	0.0373
succinate dehydrogenase cytochrome b560 subunit, mitochondrial	Sdhc	228008307	1529.78	WSLPMALSVCHR	1.221	3.18	0.0373
cleft lip and palate transmembrane protein 1 homolog isoform X1	Clptm1	568946281	1304.68	VAGIFPCPTFK	1.6	2.18	0.0374
NADH dehydrogenase [ubiquinone] 1 alpha subcomplex subunit 10, mitochondrial precursor	Ndufa10	13195624	1335.71	VITVDGNICSGK	1.808	2.95	0.0378
neuroendocrine convertase 2 precursor	Pcsk2	6679229	1531.75	FHCVGGSVQNPEK	1.432	3.98	0.0381
Golgi-specific brefeldin A-resistance guanine nucleotide exchange factor 1 isoform X3	Gbf1	569006203	1177.62	FSCLLPDPR	2.021	2.6	0.0382
regulator of nonsense transcripts 1 isoform b	Upf1	170784811	1307.66	LMQGDEICLR	1.724	2.96	0.0383
pyruvate dehydrogenase E1 component subunit alpha, somatic form, mitochondrial	Pdha1	6679261	1245.6	VDGMDILCVR	2.758	2.84	0.0384
centromere protein V isoform X1	Cenpv	568976063	1287.63	CGVQSFYTPR	1.331	3.09	0.0386
heat shock protein 75 kDa, mitochondrial isoform X1	Trap1	568996112	1356.68	NIYYLCAPNR	2.408	2.59	0.0387
eukaryotic translation initiation factor 2 subunit 3-like	LOC102642679	568904743	1795.86	SFDVNKPGCEVDDLK	2.477	2.3	0.0392
suppressor of G2 allele of SKP1 homolog	Sugt1	23956176	1943.87	ALEQNPDDAQYYCQR	2.647	5.11	0.0393
arsenite methyltransferase isoform X1	As3mt	569007591	1387.68	YYGCGLTVPER	1.219	3.1	0.0398
tubulin-folding cofactor B	Tbcb	170650659	2095.97	LDQEDALLGSYPVDDGCR	1.987	5.2	0.0399
alpha-1,3/1,6-mannosyltransferase ALG2	Alg2	172072657	1603.8	ELSVQCAGDWLPR	1.333	3.11	0.04
elongator complex protein 2 isoform X1	Elp2	569004264	1161.63	VNCLQWIR	1.7	2.71	0.0402
inositol monophosphatase 1	Impa1	31980942	1238.72	LCSIPIHGIR	1.583	2.38	0.0405
acyl-protein thioesterase 2	Lypla2	7242156	1086.56	YICPHAPR	1.714	2.54	0.041
PHD finger-like domain-containing protein 5A	Phf5a	24415990	1267.64	HHPDLIFCR	1.667	2.63	0.041
NADH dehydrogenase [ubiquinone] flavoprotein 1, mitochondrial precursor27004	Ndufv1	19526814	1132.62	LVEGCLVGGR	-	2.39	0.0418
NADH dehydrogenase [ubiquinone] iron-sulfur protein 2, mitochondrial isoform X1	Ndufs2	568910750	1090.6	IIEQCLNK	1.989	2.44	0.0419
vinculin	Vcl	31543942	1205.64	TNLLQVCER	2.002	2.65	0.0419
isoamyl acetate-hydrolyzing esterase 1 homolog isoform X3	Iah1	568977938	1937.01	LNSVVGEYANACLQVAR	3.391	4.71	0.0421
cytosol aminopeptidase	Lap3	255069715	1766.89	ADMGGAATICSAIVSAAK	11.991	3.65	0.0424
retinol dehydrogenase 11 isoform X1	Rdh11	568978923	1750.9	MLSSGVCTSNVQLPGK	1.721	4.13	0.0427
heterogeneous nuclear ribonucleoprotein D-like isoform X3	Hnrnpdl	568935917	1778.84	GFCFITYTDEEPVK	1.117	3.32	0.0428
glucosamine 6-phosphate N-acetyltransferase isoform X3	Gnpnat1	568988218	1379.66	VEDVVVSDECR	6.58	3.72	0.0429
importin-4 isoform X2	Ipo4	568989000	1062.55	DNICGALAR	3.29	2.45	0.0431
syntaxin-12	Stx12	19527102	1820.87	DFNSIIQTCSGNIQR	1.598	3.78	0.0437
NADH dehydrogenase [ubiquinone] 1 beta subcomplex subunit 9	Ndufb9	29789148	1310.65	HLESWCIHR	-	3.65	0.0441
trifunctional purine biosynthetic protein adenosine-3 isoform X4	Gart	568997287	1667.82	CFGPTAQAAQLESSK	1.771	3.69	0.0442
D-3-phosphoglycerate dehydrogenase	Phgdh	52353955	2121.09	ALVDHENVISCPHLGASTK	5.881	4.71	0.0446
ATP-binding cassette, sub-family C (CFTR/MRP), member 8 isoform X8	Abcc8	568947592	1195.6	LCAAFDAQAR	1.022	3.11	0.0449
glutaminyl-tRNA synthetase isoform 2	Qars	269954679	1137.59	ANNGICFLR	3.085	2.2	0.0451
microtubule-associated protein 4 isoform X8	Map4	568963505	1747.81	ETPGSQPSEPCSGVSR	2.29	2.24	0.0451
small glutamine-rich tetratricopeptide repeat-containing protein alpha isoform X1	Sgta	568968038	1824.91	AIELNPANAVYFCNR	2.026	3.35	0.0453
6-phosphogluconate dehydrogenase, decarboxylating isoform X1	Pgd	568930427	1410.62	SAVDNCQDSWR	2.329	3.2	0.0456
protein transport protein Sec23A isoform X1	Sec23a	568979157	1659.83	MVQVHELGCEGISK	1.247	2.85	0.0456
4-trimethylaminobutyraldehyde dehydrogenase precursor	Aldh9a1	115334671	1132.62	CQVLLEAAR	-	2.36	0.0459
histone deacetylase 6 isoform X1	Hdac6	569008635	2363.04	MMSHCNLWDNHHPETPQR	1.508	2.65	0.0459
dolichol-phosphate mannosyltransferase subunit 3 isoform X2	Dpm3	568923852	1464.67	VATFHDCEDAAR	1.805	2.59	0.0464
phosphoglycolate phosphatase	Pgp	40254507	1166.65	FIAGTGCLVR	1.882	2.67	0.0467
transcription elongation factor SPT5 isoform X2	Supt5	568945195	1717.87	VELHSTCQTISVDR	2.225	3.52	0.0469
macrophage migration inhibitory factor	Mif	6754696	1119.63	LLCGLLSDR	1.764	3.06	0.047
4-aminobutyrate aminotransferase, mitochondrial isoform 2 precursor	Abat	283483966	1688.77	GTFCSFDTPDEAIR	2.177	3.63	0.0476
cytochrome b-c1 complex subunit 1, mitochondrial precursor	Uqcrc1	46593021	1426.7	LCTSATESEVTR	2.028	3.91	0.0477
mannose-1-phosphate guanyltransferase alpha isoform X7	Gmppa	568907775	1299.79	LLPAITILGCR	2.058	2.62	0.0482
cell cycle and apoptosis regulator protein 2 isoform X2	Ccar2	568987437	1318.66	VVAQNICQYR	1.595	2.96	0.0484
actin-related protein 3	Actr3	329664963	1316.67	YSYVCPDLVK	1.421	2.33	0.0485
transmembrane emp24 protein transport domain containing 7 precursor	Tmed7	255003819	2147.1	VSALTQMESACVSIHEALK	4.289	2.43	0.0486
serrate RNA effector molecule homolog isoform X4	Srrt	568938564	1418.74	EICWNLQNIR	1.464	2.2	0.0487
neuronal migration protein doublecortin isoform c	Dcx	46575788	1829.74	YAQDDFSLDENECR	2.567	4.67	0.0489
putative adenosylhomocysteinase 2 isoform X2	Ahcyl1	568922644	1293.59	FDNLYCCR	-	2.07	0.049
dolichyl-diphosphooligosaccharide--protein glycosyltransferase 48 kDa subunit precursor	Ddost	46195798	1714.76	ELGSECGIEFDEEK	2.239	4.29	0.0499
6-phosphofructokinase type C isoform X5	Pfkp	568981406	1892.95	LPLMECVQMTQDVQK	2.004	4.56	0.05
6-phosphofructokinase, muscle type isoform X3	Pfkm	568991693	1710.84	IFANTPDSGCVLGMR	1.562	3.84	0.05
MICOS complex subunit Mic19	Chchd3	21313618	1696.81	YEYHPVCADLQTK	2.213	2.71	0.0504
pre-mRNA-processing factor 19 isoform 3	Prpf19	359718922	1871.89	QELSHALYQHDAACR	2.085	4.13	0.0507
ribonucleoprotein PTB-binding 1	Raver1	29789209	1217.62	VSFCAPGPPGR	1.566	3.08	0.0507
cathepsin B preproprotein	Ctsb	6681079	1661.82	EQWSNCPTIGQIR	2.438	3.95	0.0515
importin-9 isoform X2	Ipo9	568908754	1326.66	AIWGYCDQLK	1.938	2.17	0.0517
AP-2 complex subunit alpha-2	Ap2a2	163644277	1598.85	LLQCYPPPDPAVR	2.943	2.65	0.0519
nuclear pore complex protein Nup93 isoform X2	Nup93	568957583	1024.57	AVYCIIGR	2.104	2.5	0.0519
aspartyl aminopeptidase isoform X1	Dnpep	568907504	1458.73	SPSPFHVVAECR	1.274	2.57	0.0521
phosphatidylinositol transfer protein beta isoform isoform 3	Pitpnb	675294842	1273.59	AWNAYPYCR	4.293	2.03	0.0523
N(4)-(beta-N-acetylglucosaminyl)-L-asparaginase isoform 2 precursor	Aga	326439050	1205.52	NCQPNYWR	2.087	2.05	0.0524
condensin complex subunit 1 isoform X2	Ncapd2	568942716	1769.87	DLAYCMSQLPLTER	1.773	3.57	0.0525
E3 ubiquitin-protein ligase NEDD4	Nedd4	56699423	2238.07	LAVCGNPATSQPVTSSNHSSR	1.988	3.17	0.0526
hippocalcin-like protein 1-like	Gm4120	568978484	1425.68	LLQCDPSSASQF	1.663	2.43	0.0531
serine/arginine-rich splicing factor 7 isoform X2	Srsf7	569000118	1251.54	GHYAYDCHR	1.923	2.79	0.0535
aminopeptidase B isoform 1	Rnpep	227499103	1472.74	AFFPCFDTPAVK	2.494	2.11	0.0537
TAR DNA-binding protein 43 isoform 3	Tardbp	56682931	1064.51	NPVSQCMR	1.909	2.3	0.0537
WD repeat-containing protein 1 isoform X1	Wdr1	568934035	2274.02	MTVNESEQLVSCSMDDTVR	2.537	4.77	0.0538
26S protease regulatory subunit 8	Psmc5	7110703	1495.72	AVAHHTDCTFIR	2.347	2.88	0.0542
NADH dehydrogenase [ubiquinone] iron-sulfur protein 6, mitochondrial precursor	Ndufs6	56711244	1495.78	IIACDGGGGALGHPK	1.599	2.51	0.0544
eukaryotic translation initiation factor 4B	Eif4b	167234372	1664.82	VDVVGATQGQAGSCSR	1.914	4.4	0.0547
casein kinase II subunit beta isoform X2	Csnk2b	568998843	1463.65	YQQGDFGYCPR	2.356	3.37	0.055
protein SEC13 homolog	Sec13	29150272	1254.63	FASGGCDNLIK	1.143	2.32	0.0558
26S protease regulatory subunit 4	Psmc1	6679501	1378.73	AICTEAGLMALR	1.941	3.15	0.0561
26S proteasome non-ATPase regulatory subunit 13	Psmd13	6755210	1236.64	LELWCTDVK	1.633	2.26	0.0562
splicing factor U2AF 35 kDa subunit isoform X1	U2af1	568998616	1736.89	GGFCNFMHLKPISR	1.213	3.04	0.0564
eukaryotic translation initiation factor 3 subunit M	Eif3m	21703762	1296.7	LLYEALVDCK	2.36	2.7	0.0568
serine/threonine-protein kinase VRK1 isoform X11	Vrk1	568979546	1803.84	CHDGTLEFTSIDAHK	1.038	3.45	0.0578
ATP-binding cassette sub-family F member 1	Abcf1	39930335	1137.62	VVFAELACR	-	2.97	0.0582
vesicular integral-membrane protein VIP36 precursor	Lman2	34328278	1485.69	WSELAGCTADFR	1.788	3.23	0.0586
sorbin and SH3 domain-containing protein 2 isoform X69	Sorbs2	568954757	1372.61	CDDGWFVGTSR	1.078	2.08	0.0587
heat shock protein 105 kDa isoform X2	Hsph1	568939259	1483.66	NAVEECVYEFR	1.582	3.52	0.0591
lupus La protein homolog isoform X1	Ssb	568916096	1386.61	FSGDLDDQTCR	3.677	3.54	0.0594
large proline-rich protein BAG6 isoform 3	Bag6	357197139	2328.05	YCEVLGAAATTDYNNNHEGR	1.668	2.41	0.0598
inosine-5'-monophosphate dehydrogenase 2	Impdh2	31981382	1503.75	HGFCGIPITDTGR	2.117	3.11	0.06
FACT complex subunit SPT16	Supt16	154350222	1427.72	INFYCPGSALGR	2.53	2.63	0.0601
endoplasmic reticulum resident protein 44 precursor	Erp44	19072792	1516.69	VDCDQHSDIAQR	1.896	3	0.0608
dnaJ homolog subfamily C member 3 precursor	Dnajc3	31542563	2033.02	ICSEVLQMEPDNVNALK	1.618	5.37	0.0612
ADP-ribosylation factor-like 3 isoform X1	Arl3	569007565	1428.8	LSCVPVLIFANK	1.712	3.31	0.0613
membrane-associated progesterone receptor component 2	Pgrmc2	226442772	1899.94	GLCSGPGAGEESPAATLPR	2.224	4.94	0.0618
dihydrolipoyl dehydrogenase, mitochondrial precursor	Dld	31982856	1597.8	VCHAHPTLSEAFR	1.607	3.28	0.0623
histidine--tRNA ligase, cytoplasmic	Hars	251823891	1681.84	ILDGMFAVCGVPDSK	33.376	3.3	0.0623
monofunctional C1-tetrahydrofolate synthase, mitochondrial	Mthfd1l	283135114	1800.89	YTQQGFGNLPICMAK	2.445	4.16	0.0623
V-type proton ATPase 116 kDa subunit a isoform 1 isoform X8	Atp6v0a1	568971304	1620.78	ASLYPCPETPQER	2.025	3.09	0.0623
small nuclear ribonucleoprotein Sm D3	Snrpd3	13385598	2487.21	VLHEAEGHIVTCETNTGEVYR	1.987	5.99	0.0635
NADH dehydrogenase [ubiquinone] 1 alpha subcomplex subunit 7	Ndufa7	12963571	1263.59	LSNNYYCTR	1.689	2.72	0.0638
lanosterol synthase isoform X3	Lss	568966805	1425.69	ETLNQGLDFCR	3.035	2.24	0.0642
40S ribosomal protein S27-like	Rps27l	13385958	1042.51	LTEGCSFR	1.989	2.21	0.0644
pappalysin 2 isoform X4	Pappa2	568910817	1794.8	DQFGPLNSPFMASCR	1.127	3.29	0.0646
ER membrane protein complex subunit 8	Emc8	6754870	2392.1	FTMDCAAPTIHVYEQHENR	2.567	3.61	0.0648
60S ribosomal protein L14	Rpl14	13385472	1341.7	CMQLTDFILK	1.338	3.28	0.0654
coatomer subunit delta	Arcn1	148747410	1631.86	NTLEWCLPVIDAK	2.542	3.31	0.0655
26S protease regulatory subunit 6A	Psmc3	228008337	1362.73	AVCVEAGMIALR	1.613	3.41	0.0678
26S protease regulatory subunit 10B	Psmc6	27754103	1441.71	NVCTEAGMFAIR	2.118	3.29	0.0679
spliceosome RNA helicase Ddx39b	Ddx39b	356995868	1379.73	NCPHIVVGTPGR	1.158	3.54	0.0679
heterogeneous nuclear ribonucleoprotein U-like 2 isoform X1	Hnrnpul2	569007769	1900.91	NFILDQCNVYNSGQR	2.097	4.98	0.0681
protein lin-7 homolog C	Lin7c	6755973	1395.72	VLQSEFCNAVR	2.391	3.52	0.0681
vacuolar protein sorting-associated protein 35	Vps35	13928670	1140.59	NYLLQCTR	2.205	2.51	0.0687
phosphoglucomutase-2	Pgm2	227330633	1937.92	LSLCGEESFGTGSDHIR	1.536	2.38	0.069
prostaglandin E synthase 3-like	LOC102641464	568893112	2140.03	HLNEIDLFHCIDPNDSK	1.785	3.74	0.069
methionine--tRNA ligase, cytoplasmic isoform X1	Mars	568967394	1729.96	ILATSFICTLPAGHR	2.447	2.92	0.0697
heterogeneous nuclear ribonucleoprotein F isoform X1	Hnrnpf	568943326	1689.75	DLSYCLSGMYDHR	2.354	3.35	0.07
serine-threonine kinase receptor-associated protein	Strap	160707896	1252.65	GHFGPIHCVR	1.338	2.33	0.071
succinate dehydrogenase [ubiquinone] iron-sulfur subunit, mitochondrial isoform X1	Sdhb	568931796	1289.71	CGPMVLDALIK	2.299	2.35	0.071
proliferation-associated protein 2G4	Pa2g4	6755100	1250.64	AAHLCAEAALR	1.699	3.3	0.0715
carboxypeptidase E precursor	Cpe	22203763	2380.07	SGTAHEYSSCPDDAIFQSLAR	1.426	4.45	0.0722
Golgi resident protein GCP60	Acbd3	229608928	1977.87	DCHEEVYAGSHQYPGR	1.569	4.11	0.0723
adenylyl cyclase-associated protein 1 isoform X1	Cap1	568928280	1725.87	ALLATASQCQQPAGNK	1.992	4.79	0.0725
ATP-dependent 6-phosphofructokinase, liver type	Pfkl	31560653	1662.88	VFANAPDSACVIGLR	2.198	3.77	0.074
GPI inositol-deacylase	Pgap1	254028203	1336.63	LCANDAEDSLR	1.856	3.06	0.0741
26S protease regulatory subunit 7	Psmc2	33859604	1414.69	SVCTEAGMFAIR	1.882	2.94	0.0742
poly(rC)-binding protein 2 isoform X6	Pcbp2	568991663	1496.82	LVVPASQCGSLIGK	1.852	2.18	0.0743
probable ATP-dependent RNA helicase DDX17 isoform X1	Ddx17	568993105	1422.66	CTYLVLDEADR	1.568	3.13	0.0745
purine nucleoside phosphorylase	Pnp	7305395	1805.88	DHINLPGFCGQNPLR	1.876	4.28	0.0751
serine/threonine-protein phosphatase 2A catalytic subunit beta isoform isoform X1	Ppp2cb	568953915	1988.9	AHQLVMEGYNWCHDR	1.797	3.91	0.0751
60S ribosomal protein L11-like	Gm3552	568990135	1028.58	IAVHCTVR	1.869	2.31	0.0753
long-chain-fatty-acid--CoA ligase 5 isoform X1	Acsl5	569007473	1528.82	ADIPVVICDTPQK	1.581	2.95	0.0756
platelet-activating factor acetylhydrolase IB subunit gamma	Pafah1b3	6679201	1038.55	LGYTPVCR	2.92	2.48	0.0761
aminoacyl tRNA synthase complex-interacting multifunctional protein 1	Aimp1	126012517	1767.86	GVLSQAMVMCASSPEK	49.651	4.18	0.0764
putative pre-mRNA-splicing factor ATP-dependent RNA helicase DHX15 isoform 1	Dhx15	110835726	1784.86	TTQIPQWCVEYMR	1.739	2.72	0.0764
serpin B6 isoform X1	Serpinb6a	568981722	1110.58	TNGILFCGR	1.905	2.05	0.0769
splicing factor 3A subunit 1	Sf3a1	165932270	1254.63	EVLDQVCYR	1.166	2.03	0.0769
guanine nucleotide-binding protein G(I)/G(S)/G(T) subunit beta-2 isoform X1	Gnb2	568938402	2005.01	ACGDSTLTQITAGLDPVGR	2.032	4.46	0.0771
isocitrate dehydrogenase [NADP], mitochondrial precursor	Idh2	225579033	1206.59	CATITPDEAR	0.806	2.23	0.078
calpain-2 catalytic subunit	Capn2	157951598	1506.87	LPCQLHQVIVAR	1.482	2.7	0.0781
60S ribosomal protein L5 isoform X1	Rpl5	568935106	1295.69	DIICQIAYAR	2.573	2.86	0.0782
lamina-associated polypeptide 2 isoform alpha	Tmpo	121949760	1419.6	MSACAMGSSTMGR	1.75	4.13	0.0784
splicing factor 3B subunit 3 isoform X3	Sf3b3	568955820	1032.54	FGNICVVR	1.242	2.52	0.0784
cysteine--tRNA ligase, cytoplasmic isoform 2	Cars	357588502	1782.87	VQPQWSPPAGTEPCR	2.812	2.19	0.0786
TBC1 domain family member 15	Tbc1d15	255958202	1525.74	YVVLCESPQDSR	2.456	3.27	0.0792
ATP synthase subunit gamma, mitochondrial isoform b	Atp5c1	163838648	1272.68	GLCGAIHSSVAK	1.678	2.86	0.0797
phosphoserine phosphatase isoform X1	Psph	568937746	1529.72	FCGVEAAVSEMTR	5.345	4	0.0806
V-type proton ATPase subunit B, brain isoform	Atp6v1b2	19705578	2251.21	IPIFSAAGLPHNEIAAQICR	2.113	3.99	0.081
lon protease homolog, mitochondrial precursor	Lonp1	116089322	1486.82	AGVTCIILPAENR	2.186	3.08	0.0812
proliferating cell nuclear antigen	Pcna	7242171	1334.68	CAGNEDIITLR	1.448	3.67	0.0832
40S ribosomal protein S20	Rps20	13385652	919.51	VCADLIR	1.945	2.49	0.0833
eukaryotic peptide chain release factor GTP-binding subunit ERF3B	Gspt2	58331156	1313.69	TAGTICLETFK	1.415	2.17	0.0835
U5 small nuclear ribonucleoprotein 200 kDa helicase	Snrnp200	40018610	1281.66	TNVALMCMLR	6.937	2.41	0.0836
voltage-dependent anion-selective channel protein 2	Vdac2	6755965	1975.83	SCSGVEFSTSGSSNTDTGK	1.801	6.7	0.0838
glutathione S-transferase Mu 5	Gstm5	6754086	1426.6	YICGEAPDYDR	2.006	2.85	0.0845
NADH dehydrogenase [ubiquinone] 1 alpha subcomplex subunit 12	Ndufa12	27228985	2183.02	WLHCMTDDPPTTNPPTAR	1.6	2.93	0.0847
protein Niban	Fam129a	241982745	2248.06	IHPEASHPAAIQQDSCEER	3.549	3.63	0.0855
leucine-rich PPR motif-containing protein, mitochondrial precursor	Lrpprc	134031976	1599.81	SCGSLLPELSLAER	3.237	3.69	0.086
heterogeneous nuclear ribonucleoprotein R isoform b [	Hnrnpr	459683868	1236.62	GYAFITFCGK	1.374	2.86	0.0865
transportin-1 isoform X3	Tnpo1	568984445	1674.89	SHAVACVNQFIISR	1.25	3.25	0.087
transportin-1 isoform X3	Tnpo1	568984445	1196.62	SITCWTLSR	1.799	2.11	0.087
mannosyl-oligosaccharide glucosidase	Mogs	31981106	2372	HTCEQGDGVGPYGWEFHDGR	1.883	3.28	0.0874
cystathionine beta-synthase isoform 2	Cbs	30089694	988.47	CTWQLGR	1.481	2.55	0.0875
asparagine--tRNA ligase, cytoplasmic isoform 2	Nars	219275596	995.51	DVCLYPR	4.537	2.18	0.0883
60S ribosomal protein L15-like	Gm4581	149267527	1140.58	VRCWQYR	1.463	2.79	0.0889
aspartate--tRNA ligase, cytoplasmic isoform 1	Dars	211065507	1436.7	LEYCEALAMLR	1.749	3.19	0.0897
eukaryotic translation initiation factor 6	Eif6	27501448	2616.32	LSALGNVTTCNDYVALVHPDLDR	1.863	4.18	0.0901
phenylalanine--tRNA ligase beta subunit	Farsb	31981400	1240.62	HLCAVYYNK	1.842	2.71	0.0902
non-POU domain-containing octamer-binding protein	Nono	255958247	1321.68	FACHSASLTVR	1.85	4.27	0.0911
acetyl-CoA acetyltransferase, mitochondrial precursor	Acat1	21450129	2002.08	QATLGAGLPISTPCTTVNK	1.464	4.79	0.0914
pyrroline-5-carboxylate reductase 1, mitochondrial isoform X1	Pycr1	568972717	1244.62	CMTNTPVVVR	2.066	3.3	0.0921
peptidyl-prolyl cis-trans isomerase FKBP4	Fkbp4	6753882	1176.63	TQLAVCQQR	2.355	2.78	0.0923
serine hydroxymethyltransferase, mitochondrial isoform 2	Shmt2	356640163	1433.75	AALEALGSCLNNK	6.627	4.07	0.0944
heterogeneous nuclear ribonucleoprotein D0 isoform d	Hnrnpd	116256516	1235.6	FGEVVDCTIK	-	2.95	0.0945
microtubule-associated protein RP/EB family member 1	Mapre1	7106301	2343.14	NIELICQENEGENDPVLQR	2.027	6.04	0.095
microtubule-associated protein 1B isoform X1	Map1b	568984258	1725.83	ASLTLFCPEEGDWK	1.599	2.69	0.0983
eukaryotic translation initiation factor 3 subunit D isoform X1	Eif3d	568992908	2383.15	NLAMEATYINHNFSQQCLR	2.857	3.75	0.099
3'(2'),5'-bisphosphate nucleotidase 1	Bpnt1	39652626	1437.77	LVQMSICSSLAR	1.59	3.6	0.0991
40S ribosomal protein S6	Rps6	6677809	1408.74	LNISFPATGCQK	1.717	2.73	0.0992
cellular nucleic acid-binding protein isoform 3	Cnbp	157909784	1568.69	CGETGHVAINCSK	-	2.32	0.0993
T-complex protein 1 subunit theta	Cct8	126723461	1904.93	IAVYSCPFDGMITETK	2.473	3.96	0.0997
CTP synthase 1 isoform X1	Ctps	568929379	1358.76	GLGLSPDLVVCR	2.26	3.15	0.1
60S ribosomal protein L4	Rpl4	30794450	1384.64	FCIWTESAFR	1.69	2.7	0.101
ADP-ribosylation factor 4	Arf4	6680720	1711.82	NICFTVWDVGGQDK	2.108	3.24	0.101
NADPH--cytochrome P450 reductase isoform X1	Por	568938051	1532.75	EVGETLLYYGCR	1.665	3.57	0.101
thioredoxin-related transmembrane protein 1 precursor	Tmx1	33859722	1635.91	FIITALPSIYHCK	1.514	3.73	0.101
proteasome subunit beta type-2 isoform X1	Psmb2	568929154	934.49	NLADCLR	2.04	2.26	0.102
ras-related protein Rab-1B	Rab1b	21313162	829.46	SCLLLR	1.614	2.36	0.102
60S ribosomal protein L36	Rpl36	160333837	1300.61	EVCGFAPYER	1.813	2.38	0.103
60S ribosomal protein L9-like	LOC101056029	568900450	1308.67	TGVACSVSQAQK	2.224	3.2	0.103
chromobox protein homolog 3-like	Gm6901	82950919	1545.67	LTWHSCPEDEAQ	2.127	3.4	0.103
ERO1-like protein beta isoform X3	Ero1lb	568981946	1914.93	VWNSIYEENCFKPR	1.933	4.05	0.103
high mobility group protein B2 isoform X1	Hmgb2	568955035	2026.05	RPPSAFFLFCSENRPK	1.553	4.75	0.104
leucine-rich repeat-containing protein 59	Lrrc59	19527026	1193.63	ATVLDLSCNK	-	2.11	0.105
40S ribosomal protein S2-like isoform X2	Gm6139	568892508	863.49	CGSVLVR	1.602	2.4	0.106
electron transfer flavoprotein subunit alpha, mitochondrial	Etfa	227500281	1363.74	LGGEVSCLVAGTK	1.843	4.5	0.106
rab GDP dissociation inhibitor alpha	Gdi1	33859560	1925.9	TDDYLDQPCLETINR	1.813	5.35	0.106
ribose-phosphate pyrophosphokinase 1	Prps1	10946854	1827.87	FSNQETCVEIGESVR	1.835	4.4	0.106
T-complex protein 1 subunit delta	Cct4	6753322	1419.82	IGLIQFCLSAPK	1.628	3.5	0.106
ubiquitin carboxyl-terminal hydrolase isozyme L1	Uchl1	188219614	2056.96	NEAIQAAHDSVAQEGQCR	2.766	5.66	0.106
valine--tRNA ligase	Vars	255069795	1495.71	CGEMAQAASAAVTR	1.539	4.87	0.106
pyruvate carboxylase, mitochondrial isoform X2	Pcx	569005643	1481.69	ADFAQACQDAGVR	2.127	4.72	0.107
serine--tRNA ligase, cytoplasmic isoform 2	Sars	326381098	1079.54	IWGDCTVR	2.791	2.53	0.108
myb-binding protein 1A	Mybbp1a	31982724	1593.85	SVFGHICPHLTPR	0.989	2.65	0.109
serine/threonine-protein phosphatase 2A 65 kDa regulatory subunit A alpha isoform	Ppp2r1a	8394027	1631.9	ENVIMTQILPCIK	1.833	4.04	0.109
T-complex protein 1 subunit eta	Cct7	238814391	1206.57	YNFFTGCPK	1.83	2.18	0.109
threonine--tRNA ligase, cytoplasmic	Tars	27229277	1249.65	CGPLIDLCR	-	2.44	0.109
6-phosphogluconolactonase isoform 1	Pgls	13384778	1653.82	TGALCWFLDEAAAR	2.476	3.76	0.11
receptor expression-enhancing protein 5	Reep5	161016826	1138.57	NCMTDLLAK	1.372	2.22	0.11
ras-related C3 botulinum toxin substrate 1 precursor	Rac1	45592934	1654.88	HHCPNTPIILVGTK	1.094	2.94	0.111
GMP synthase [glutamine-hydrolyzing]	Gmps	85861218	1318.61	SYSYVCGISSK	-	2.71	0.112
heterogeneous nuclear ribonucleoprotein L isoform X4	Hnrnpl	568944898	1194.57	LCFSTAQHAS	2.073	2.13	0.112
T-complex protein 1 subunit gamma	Cct3	6753320	919.55	ACTILLR	2.363	2.06	0.112
AP-2 complex subunit alpha-1 isoform X1	Ap2a1	568947209	1539.76	ACNQLGQFLQHR	-	2.62	0.113
glucosidase 2 subunit beta isoform 2 precursor	Prkcsh	652697818	1625.73	YEQGTGCWQGPNR	2.289	3.89	0.113
proteasome subunit alpha type-5	Psma5	7106387	2236.04	GPQLFHMDPSGTFVQCDAR	1.959	4.94	0.113
aspartate aminotransferase, mitochondrial	Got2	6754036	1569.81	EYLPIGGLAEFCK	2.988	3.35	0.114
40S ribosomal protein SA-like	LOC102642689	568903782	1374.68	YVDIAIPCNNK	2.073	3.52	0.115
nudC domain-containing protein 2 isoform 2	Nudcd2	595582100	1348.68	AQDIQCGLQSR	1.945	3.01	0.115
transferrin receptor protein 1 isoform X1	Tfrc	568995055	1082.51	WNIDSSCK	1.974	2.35	0.116
inorganic pyrophosphatase	Ppa1	27754065	1730.82	GISCMNTTVSESPFK	2.807	4.65	0.117
succinate dehydrogenase [ubiquinone] flavoprotein subunit, mitochondrial precursor	Sdha	54607098	1830.92	AAFGLSEAGFNTACLTK	5.471	4.86	0.117
succinate dehydrogenase [ubiquinone] flavoprotein subunit, mitochondrial precursor	Sdha	54607098	2324.04	TYFSCTSAHTSTGDGTAMVTR	1.736	4.47	0.117
vigilin	Hdlbp	672424499	1135.61	ICLEIMQR	1.533	2.15	0.117
ribonuclease inhibitor isoform a	Rnh1	31981748	1250.61	LDDCGLTEVR	2.214	3.56	0.118
coatomer subunit epsilon	Cope	10946972	2135.01	NAFYIGSYQQCINEAQR	2.252	5.38	0.119
hypoxanthine-guanine phosphoribosyltransferase	Hprt	96975138	1544.79	DLNHVCVISETGK	2.454	3.45	0.119
sarcoplasmic/endoplasmic reticulum calcium ATPase 3 isoform a	Atp2a3	254039658	1693.88	VGEATETALTCLVEK	-	5.44	0.119
transforming protein RhoA isoform X1	Rhoa	568962753	1680.94	HFCPNVPIILVGNK	1.427	3.22	0.119
60S ribosomal protein L24	Rpl24	18250296	1262.62	VELCSFSGYK	1.829	2.05	0.121
60S ribosomal protein L28-like	Gm10051	568892520	1041.55	NCSSFLIK	1.908	2.07	0.122
elongation factor 1-gamma	Eef1g	110625979	1682.86	WFLTCINQPQFR	1.342	4.4	0.122
eukaryotic translation initiation factor 1A-like	LOC102642868	568904537	1270.6	LEAMCFDGVR	1.78	2.59	0.123
prelamin-A/C isoform X1	Lmna	568921945	1409.67	AQNTWGCGSSLR	2.267	2.88	0.124
ADP/ATP translocase 1	Slc25a4	148747424	1321.62	EFNGLGDCLTK	1.611	2.91	0.125
malate dehydrogenase, cytoplasmic	Mdh1	254540027	1099.53	ENFSCLTR	1.912	2.23	0.126
alpha-actinin-1 isoform X5	Actn1	568978636	1242.64	EGLLLWCQR	1.758	2.93	0.127
DNA replication licensing factor MCM5	Mcm5	700274133	1232.65	AIACLLFGGSR	1.751	3.55	0.128
alpha-soluble NSF attachment protein isoform X2	Napa	568944692	1490.72	ADPQEAINCLMR	2.533	3.13	0.129
eukaryotic translation initiation factor 3 subunit A	Eif3a	146219837	1000.51	HCDLQVR	1.722	2.29	0.13
ubiquitin-conjugating enzyme E2 N	Ube2n	18017605	947.57	ICLDILK	1.847	2.26	0.13
40S ribosomal protein S4, X isoform	Rps4x	6677805	1615.98	LRECLPLIIFLR	2.033	3.74	0.131
general vesicular transport factor p115	Uso1	23956096	1471.73	LQTENCELLQR	2.189	3.46	0.131
importin-5 isoform X4	Ipo5	568988763	2220.03	YAACNAVGQMATDFAPGFQK	-	2.53	0.131
fructose-bisphosphate aldolase A isoform X2	Aldoa	568949350	1200.61	ALANSLACQGK	2.153	3.63	0.132
ATP-dependent RNA helicase DDX1	Ddx1	19527256	1718.8	GHQFSCVCLHGDR	-	3.43	0.133
NADH dehydrogenase [ubiquinone] 1 alpha subcomplex subunit 8	Ndufa8	21312012	1383.73	LVNGCALNFFR	1.453	2.36	0.133
poly(rC)-binding protein 1	Pcbp1	6754994	1745.96	AITIAGVPQSVTECVK	1.647	3.64	0.134
60S acidic ribosomal protein P0	Rplp0	6671569	2253.17	AGAIAPCEVTVPAQNTGLGPEK	2.08	4.17	0.137
60S acidic ribosomal protein P0	Rplp0	6671569	1339.68	CFIVGADNVGSK	1.85	2.41	0.137
proteasome subunit alpha type-1	Psma1	33563282	1026.53	LLCNFMR	1.377	2.35	0.137
proteasome subunit alpha type-4 isoform X1	Psma4	568961543	1680.86	ATCIGNNSAAAVSMLK	1.773	3.33	0.137
serine/arginine-rich splicing factor 1 isoform 2	Srsf1	118582271	1485.64	EAGDVCYADVYR	1.976	3.11	0.138
T-complex protein 1 subunit beta isoform X1	Cct2	568966542	2439.18	TVYGGGCSEMLMAHAVTQLANR	1.648	2.97	0.138
guanine nucleotide-binding protein subunit beta-2-like 1	Gnb2l1	6680047	1980.96	FSPNSSNPIIVSCGWDK	1.925	4.4	0.139
60S ribosomal protein L3-like, partial	Gm12816	568904602	1310.69	VACIGAWHPAR	2.053	3.49	0.14
ATP-dependent RNA helicase A isoform X1	Dhx9	568908101	1425.72	AAECNIVVTQPR	2.125	3.61	0.141
malate dehydrogenase, mitochondrial precursor	Mdh2	31982186	1443.84	TIIPLISQCTPK	2.107	2.14	0.142
26S proteasome non-ATPase regulatory subunit 2	Psmd2	19882201	895.49	CALGVFR	1.518	2.5	0.143
60S ribosomal protein L18a	Rpl18a	58037465	1523.72	DLTTAGAVTQCYR	1.846	4.31	0.143
cytoplasmic dynein 1 heavy chain 1	Dync1h1	134288917	1701.85	IQFVGACNPPTDPGR	2.523	4.19	0.143
60S ribosomal protein L10	Rpl10	16418339	1053.49	MLSCAGADR	1.914	2.24	0.144
probable ATP-dependent RNA helicase DDX5 isoform X1	Ddx5	568971472	1167.62	LIDFLECGK	1.699	2.25	0.144
guanine nucleotide-binding protein G(o) subunit alpha isoform B	Gnao1	164607137	1649.74	LWGDSGIQECFNR	1.961	4.56	0.145
60S ribosomal protein L7a	Rpl7a	7305443	1773.84	TCTTVAFTQVNSEDK	2.493	4.12	0.146
CAD protein isoform 2	Cad	575501556	2232.19	AQGLPVTCEVAPHHLFLNR	1.628	3.81	0.146
superoxide dismutase [Cu-Zn]	Sod1	45597447	1074.61	LACGVIGIAQ	2.049	2.65	0.146
peroxiredoxin-4 precursor	Prdx4	7948999	2243.99	ENECHFYAGGQVYPGEASR	1.853	5.23	0.147
vesicle-fusing ATPase	Nsf	31543349	1934.01	THPSVVPGCIAFSLPQR	3.095	2.98	0.147
heterogeneous nuclear ribonucleoprotein K isoform 4	Hnrnpk	672424492	815.44	VVECIK	1.511	2.2	0.148
60S ribosomal protein L30-like	Gm6570	568890009	1426.83	LVILANNCPALR	1.807	3.68	0.149
arginine--tRNA ligase, cytoplasmic	Rars	262118273	1341.69	AAQTSVAYGCIK	2.216	3.44	0.149
deoxyuridine triphosphatase isoform 2	Dut	21281687	1075.6	IAQLICER	1.937	2.03	0.149
DNA replication licensing factor MCM4	Mcm4	255918149	1188.66	AGIICQLNAR	1.522	2.25	0.149
eukaryotic translation initiation factor 3 subunit B	Eif3b	29789343	1992.97	FSHQGVQLIDFSPCER	2.048	4.09	0.149
T-complex protein 1 subunit alpha isoform 2	Tcp1	595582154	1547.61	GANDFMCDEMER	2.448	3.64	0.149
eukaryotic translation initiation factor 2 subunit 1	Eif2s1	13385624	1494.74	AGLNCSTETMPIK	0.827	3.17	0.15
heterogeneous nuclear ribonucleoprotein M isoform b	Hnrnpm	158186704	982.51	GCAVVEFK	2.61	2.06	0.15
40S ribosomal protein S3a	Rps3a1	254553321	1772.89	ACQSIYPLHDVFVR	1.64	3.82	0.151
40S ribosomal protein S5 isoform X1	Rps5	568945150	1569.83	VNQAIWLLCTGAR	1.826	5.14	0.151
filamin-B isoform X2	Flnb	568985493	1512.75	ACIPQSFTVDSSK	2.193	2.53	0.152
importin subunit beta-1	Kpnb1	88014720	1740.9	ESCLEAYTGIVQGLK	3.493	4.23	0.152
cullin-associated NEDD8-dissociated protein 1	Cand1	189409138	1368.74	TYIQCIAAISR	5.669	3.12	0.153
DNA replication licensing factor MCM6	Mcm6	6678832	1667.92	LVFLACHVAPTNPR	2.06	3.19	0.153
60S ribosomal protein L23-like	LOC100044627	377837128	1119.54	ECADLWPR	2.897	2.04	0.154
glutathione S-transferase Mu 3	Gstm3	33468899	1173.58	CLDAFPNLR	1.179	2.54	0.155
signal recognition particle 72	Srp72	118344452	1261.6	YDECLAVYR	1.875	2.64	0.156
40S ribosomal protein S15a	Rps15a	24762230	1216.7	LNKCGVISPR	1.781	3.32	0.159
translationally-controlled tumor protein isoform X1	Tpt1	568987470	1500.73	EIADGLCLEVEGK	1.904	3.26	0.16
60S ribosomal protein L27a-like	Gm8213	568893303	1490.7	NQSFCPTVNLDK	2.004	2.94	0.162
protein transport protein Sec23B isoform 1	Sec23b	357527458	1534.82	AILNPLCQVDYR	0.738	2.36	0.162
exportin-2	Cse1l	12963737	1554.77	SQICDNAALYAQK	1.384	3.43	0.163
mitochondrial 10-formyltetrahydrofolate dehydrogenase isoform X3	Aldh1l2	568967267	1955.93	SCDVKPNDTVDSLYNR	3.438	3.31	0.163
ras-related protein Rab-3A isoform X2	Rab3a	568955316	1048.58	LVDVICEK	2.341	2.48	0.164
rab GDP dissociation inhibitor beta	Gdi2	116089273	1252.76	VICILSHPIK	1.886	2.56	0.165
DNA replication licensing factor MCM7 isoform X1	Mcm7	568938407	1436.74	CSILAAANPAYGR	1.627	3.73	0.169
programmed cell death 6-interacting protein isoform 3	Pdcd6ip	258547156	1488.71	YYDQICSIEPK	1.68	3.46	0.169
bifunctional glutamate/proline--tRNA ligase isoform X2	Eprs	568911610	1261.66	LNQWCNVVR	2.245	2.13	0.172
bifunctional glutamate/proline--tRNA ligase isoform X2	Eprs	568911610	1090.58	VACQGEVVR	2.618	3.11	0.172
signal recognition particle subunit SRP68	Srp68	47271535	1344.64	LFESMLSECR	1.963	3.3	0.172
40S ribosomal protein S11	Rps11	21426889	1415.66	NMSVHLSPCFR	1.786	2.51	0.173
small nuclear ribonucleoprotein Sm D2-like	Gm5848	568889928	1316.66	HCNMVLENVK	1.933	3.67	0.176
fatty acid synthase	Fasn	93102409	1407.72	SFYGTALFLCR	1.834	3.24	0.178
protein transport protein Sec31A isoform X16	Sec31a	568936184	2033.98	TQACLCYICAGNVER	-	4.14	0.179
heterogeneous nuclear ribonucleoproteins A2/B1-like isoform X2	LOC102642938	568904641	1066.55	LTDCVVMR	2.128	2.68	0.183
60 kDa heat shock protein, mitochondrial isoform X1	Hspd1	568905803	1757.97	AAVEEGIVLGGGCALLR	3.034	4.64	0.184
delta-1-pyrroline-5-carboxylate synthase isoform 2	Aldh18a1	255958294	1120.55	GDECGLALGR	2.446	3.19	0.184
annexin A5 isoform X1	Anxa5	568920727	1243.59	ALLLLCGGEDD	2.081	2.9	0.186
40S ribosomal protein S3	Rps3	6755372	1067.59	RACYGVLR	2.591	2.04	0.191
DNA replication licensing factor MCM2	Mcm2	172088119	1367.71	CTVIAAANPIGGR	1.482	3.45	0.195
triosephosphate isomerase	Tpi1	226958349	1205.6	IAVAAQNCYK	3.553	3.3	0.195
aconitate hydratase, mitochondrial precursor	Aco2	18079339	1918.88	VGLIGSCTNSSYEDMGR	1.996	4.68	0.197
coatomer subunit beta'	Copb2	29789080	1063.58	VWCVASLR	1.588	2.56	0.197
phosphoglycerate kinase 1	Pgk1	70778976	1958.87	GCITIIGGGDTATCCAK	-	4.69	0.198
NADH-cytochrome b5 reductase 3 isoform X2	Cyb5r3	568991032	2630.28	AVLKDPNDHTVCYLLFANQSEK	-	3.63	0.201
DNA replication licensing factor MCM3	Mcm3	33859484	1047.53	YVLCTAPR	1.855	2.64	0.202
protein canopy homolog 2 isoform X2	Cnpy2	568968091	1873.91	SEAHLTELLEEVCDR	2.551	2.47	0.202
sodium/potassium-transporting ATPase subunit alpha-1 precursor	Atp1a1	21450277	1158.6	ACVVHGSDLK	15.431	2.51	0.203
annexin A4 isoform X1	Anxa4	568940372	1734.88	GAGTDEGCLIEILASR	2.066	4.6	0.204
myosin-9	Myh9	114326446	1085.55	CNGVLEGIR	1.418	2.84	0.204
40S ribosomal protein S12-like	Rps12l2	149258592	1134.61	LGEWVGLCK	2.285	2.82	0.205
myosin light polypeptide 6	Myl6	33620739	1414.69	ILYSQCGDVMR	2.254	2.89	0.207
heterogeneous nuclear ribonucleoprotein U	Hnrnpu	160333923	1202.59	MCLFAGFQR	1.295	3.27	0.211
stress-70 protein, mitochondrial	Hspa9	162461907	1926.87	MEEFKDQLPADECNK	5.248	2.58	0.215
ADP/ATP translocase 2	Slc25a5	22094075	1761.81	GTDIMYTGTLDCWR	2.192	4.34	0.217
alpha-enolase isoform X3	Eno1	568930542	1706.89	VNQIGSVTESIQACK	2.128	4.62	0.218
profilin-1	Pfn1	6755040	1239.57	CYEMASHLR	1.297	2.96	0.219
ATP-dependent RNA helicase DDX3X isoform X1	Ddx3x	569008633	1253.69	GCHLLVATPGR	1.161	3.71	0.225
alanine--tRNA ligase, cytoplasmic isoform X1	Aars	568956640	1790.92	ITCLCQVPQNAANR	-	3.92	0.228
calreticulin precursor	Calr	6680836	2929.46	CKDDEFTHLYTLIVRPDNTYEVK	1.343	4.32	0.229
glycine--tRNA ligase	Gars	93102417	1699.82	TSYGWIEIVGCADR	10.118	4.2	0.229
stress-induced-phosphoprotein 1	Stip1	14389431	1146.5	CMMAQYNR	1.28	2.59	0.23
rRNA 2'-O-methyltransferase fibrillarin-like	LOC102643269	568889938	1085.53	HEGVFICR	2.13	2.36	0.232
sarcoplasmic/endoplasmic reticulum calcium ATPase 2 isoform b	Atp2a2	158635979	1929.95	NYLEQPGKECVQPATK	1.149	2.92	0.232
heat shock 70 kDa protein 4	Hspa4	112293266	1455.71	FLEMCDDLLAR	2.017	2.94	0.236
40S ribosomal protein S8	Rps8	6677813	1933.87	LDVGNFSWGSECCTR	-	3.84	0.239
glycerol-3-phosphate dehydrogenase, mitochondrial precursor	Gpd2	224922803	1488.69	EYACTAVDMISR	2.146	3.12	0.242
40S ribosomal protein S17-like	Gm5215	568993807	1331.74	VCEEIAIIPSK	-	3.83	0.246
coatomer subunit alpha	Copa	226823359	1109.51	AWEVDTCR	2.667	2.03	0.258
UDP-glucose:glycoprotein glucosyltransferase 1 isoform X1	Uggt1	568906530	2167.95	DFNLDGAPYGYTPFCDSR	2.056	4.77	0.262
glutamine--fructose-6-phosphate aminotransferase [isomerizing] 1	Gfpt1	7305085	2128.05	ETDCGVHINAGPEIGVASTK	1.732	2.49	0.264
ATP synthase subunit d, mitochondrial isoform X1	Atp5h	568975897	1413.69	SCAEFVSGSQLR	0.875	5.18	0.265
heterogeneous nuclear ribonucleoprotein A3-like, partial	LOC1LOC10264101302642679	568904783	1410.7	WGTLTDCVVMR	1.962	3.49	0.267
coatomer subunit gamma-1 isoform 1	Copg1	8567338	1908.97	ALCQITDSTMLQAVER	1.982	4.78	0.303
eukaryotic translation initiation factor 5A-2	Eif5a2	29243942	2105.98	YEDICPSTHNMDVPNIK	0.919	2.41	0.304
annexin A6 isoform b	Anxa6	158966670	1100.57	FMTVLCTR	1.85	2.11	0.311
ubiquitin-like modifier-activating enzyme 1 isoform 2	Uba1	209862989	1064.5	VGEFCHSR	2.155	2.83	0.346
nucleoside diphosphate kinase A	Nme1	37700232	1124.56	GDFCIQVGR	-	3.47	0.347
60S ribosomal protein L12	Rpl12	160333553	1486.73	CTGGEVGATSALAPK	1.446	4.86	0.352
heat shock protein HSP 90-beta	Hsp90ab1	40556608	883.44	FENLCK	2.082	2.11	0.39
clathrin heavy chain 1	Cltc	51491845	1142.61	AHIAQLCEK	1.753	2.65	0.394
protein disulfide-isomerase A3 precursor	Pdia3	112293264	2225.05	FIQDSIFGLCPHMTEDNK	1.057	2.49	0.395
tubulin alpha-1A chain	Tuba1a	6755901	1932.94	AVCMLSNTTAIAEAWAR	-	5.79	0.398
dihydropyrimidinase-related protein 2	Dpysl2	40254595	2143.97	THNSALEYNIFEGMECR	3.048	4.11	0.409
cofilin-1	Cfl1	6680924	1863.87	HELQANCYEEVKDR	2.144	5.81	0.419
hypoxia up-regulated protein 1 isoform X4	Hyou1	568958751	1113.6	LCQGLFFR	1.311	2.94	0.43
heat shock cognate 71 kDa protein	Hspa8	31981690	1345.65	CNEIISWLDK	-	2.96	0.441
peptidyl-prolyl cis-trans isomerase A-like	Gm9234	568894515	1671.81	IIPGFMCQGGDFTR	1.781	3.51	0.479
mesencephalic astrocyte-derived neurotrophic factor isoform X1	Manf	568963192	1629.76	LCYYIGATDDAATK	1.855	3.78	0.51
transitional endoplasmic reticulum ATPase	Vcp	225543319	2258.95	EDEEESLNEVGYDDIGGCR	23.512	5.9	0.523
protein disulfide-isomerase precursor	P4hb	42415475	1035.51	ITEFCHR	1.556	2.02	0.582
actin, cytoplasmic 1	Actb	6671509	845.39	CDVDIR	1.132	2.44	0.584
elongation factor 2	Eef2	33859482	2080.97	CELLYEGPPDDEAAMGIK	1.334	4.89	0.625
ATP-citrate synthase isoform 2	Acly	29293809	1728.79	AVQGMLDFDYVCSR	1.828	4.03	0.688
elongation factor 1-alpha 1	Eef1a1	126032329	3068.47	SGDAAIVDMVPGKPMCVESFSDYPPLGR	2.143	4.1	0.769
glyceraldehyde-3-phosphate dehydrogenase-like isoform 2	Gm20899	149273202	1629.87	VPTPNVSVVDLTCR	2.38	4.03	1
endoplasmin precursor	Hsp90b1	6755863	2429.14	LTESPCALVASQYGWSGNMER	2.042	6.13	1.16
14-3-3 protein theta	Ywhaq	6756039	1469.72	YLAEVACGDDRK	1.973	3.69	ni
14-3-3 protein zeta/delta-like, partial	LOC102641764	568902620	1177.48	YDDMAACMK	2.279	3.16	ni
40S ribosomal protein S21 isoform X1	Rps21	568920401	1083.57	TYGICGAIR	2.035	2.52	ni
40S ribosomal protein S28 isoform X1	Rps28	569001008	1289.6	TGSQGQCTQVR	0.954	2.74	ni
40S ribosomal protein S29	Rps29	6677803	986.46	YGLNMCR	2.315	2.28	ni
acyl-CoA dehydrogenase family member 9, mitochondrial	Acad9	100817933	1288.66	AYICAHPLDR	2.299	2.12	ni
acyl-CoA-binding domain-containing protein 5 isoform X3	Acbd5	568914413	2971.33	SSEDEKPGDESSQQTGHTIVCAHQDR	1.698	3.7	ni
ADP-ribosylation factor-like protein 6-interacting protein 1	Arl6ip1	45433590	1314.66	FHEICSNLVK	1.545	3.19	ni
ATPase WRNIP1	Wrnip1	254540120	1701.81	AGEEHYNCISALHK	1.914	3.54	ni
caspase-6	Casp6	157951736	1093.63	IFIIQACR	1.982	3.04	ni
cation-independent mannose-6-phosphate receptor precursor	Igf2r	133778978	1282.69	ATLITFLCDR	1.25	2.77	ni
cellular tumor antigen p53 isoform b	Trp53	187960040	1708.86	CSDGDGLAPPQHLIR	1.255	3.09	ni
choline transporter-like protein 1 isoform B	Slc44a1	227499988	1761.84	LVSGYDSYGNICGQR	1.9	3.38	ni
chromodomain helicase DNA binding protein 5 isoform X7	Chd5	568931388	2071.96	HLCEPGADGAETFADGVPR	2.068	3.48	ni
constitutive coactivator of PPAR-gamma-like protein 2	Fam120c	126723307	1571.8	SDPLPAPSQCALSR	2.729	2.33	ni
cytochrome b-c1 complex subunit 6, mitochondrial	Uqcrh	21539599	992.49	LELCDNR	1.753	2.03	ni
dehydrogenase/reductase SDR family member 13 precursor	Dhrs13	117647267	1822.87	YFANCHVEEVSPAAR	2.056	3.13	ni
delta-like protein 3 precursor	Dll3	116292184	3001.44	CSLQPCQNGGLCLDLGHALRCRCR	-	3.37	ni
DENN domain-containing protein 4C	Dennd4c	300863147	1764.89	LMPGCEVIQATPYGR	3.358	2.6	ni
dihydropyrimidinase-related protein 5 isoform X1	Dpysl5	568934411	1311.73	CHGVPLVTISR	1.297	2.8	ni
disintegrin and metalloproteinase domain-containing protein 10 precursor	Adam10	150378458	1678.83	TITLQPGSPCNDFR	1.772	3.07	ni
DNA-directed RNA polymerase II subunit RPB2	Polr2b	226958589	1485.75	STYCLLNGLTDR	2.152	3.24	ni
dynamin 1-like isoform X12	Dnm1l	568996397	1934.99	IIQHCSNYSTQELLR	2.018	3.32	ni
dynein light chain 2, cytoplasmic	Dynll2	18087731	1475.73	YNPTWHCIVGR	1.75	2.9	ni
exosome complex component RRP40	Exosc3	39930417	2317.22	NRPNVQVGDLIYGQCVVANK	2.224	3.32	ni
factor, arginine/serine-rich 2, interacting protein isoform X2	Scaf11	568993406	1830.8	EFCADHDISPDTSLR	1.488	2.29	ni
F-box only protein 2 isoform X1	Fbxo2	568931131	1742.96	VLAELPATELVQACR	2.21	4.01	ni
F-box/LRR-repeat protein 15	Fbxl15	140970874	1182.6	ALGALAEGCPR	1.665	2.34	ni
fragile X mental retardation syndrome-related protein 1 isoform 3	Fxr1	17998694	1276.63	CTVDVPEDLR	1.492	2.46	ni
fragile X mental retardation syndrome-related protein 2	Fxr2	83921589	1689.8	ANEQEPCGWWLAR	1.55	3.17	ni
granulins precursor	Grn	224967126	1664.74	HCCPGGFHCSAR	-	2.61	ni
guanine nucleotide-binding protein G(I)/G(S)/G(O) subunit gamma-12 isoform X1	Gng12	568940670	1712.75	ASADLMSYCEEHAR	1.729	2.42	ni
guanine nucleotide-binding protein G(z) subunit alpha isoform X1	Gnaz	568966705	1425.75	IPLSVCFPEYK	-	2.49	ni
heat shock 70 kDa protein 4L isoform X2	Hspa4l	568921291	1579.84	AQFEQLCASLLAR	3.572	3.93	ni
hydroxymethylglutaryl-CoA synthase, cytoplasmic	Hmgcs1	612339316	1280.62	HSLSYDCIGR	2.49	2.38	ni
leucine-rich alpha-2-glycoprotein precursor	Lrg1	16418335	934.49	NLADLCR	2.376	2.07	ni
leucine-rich repeat-containing protein 4 precursor	Lrrc4	124339785	1298.67	YLNLGMCNLK	1.841	2.24	ni
L-gulonolactone oxidase	Gulo	30520195	1493.76	GDDILLSPCFQR	81.517	3.06	ni
lysophosphatidylcholine acyltransferase 1 isoform X2	Lpcat1	568983226	1478.78	LPADTCLLEFAR	1.053	2.75	ni
major prion protein precursor	Prnp	13173473	1585.78	VVEQMCVTQYQK	2.844	3.72	ni
methylcrotonoyl-CoA carboxylase subunit alpha, mitochondrial	Mccc1	186700620	1608.84	YCLHQYNIVGLR	0.932	3.05	ni
methylthioribulose-1-phosphate dehydratase	Apip	258613873	2036.95	MAHAMNEYPDSCAVLVR	2.87	3.05	ni
mitochondrial-processing peptidase subunit beta precursor	Pmpcb	95113671	1452.71	LCTDVTESEVAR	2.578	3.66	ni
mitogen-activated protein kinase 15 isoform X14	Mapk15	568992741	1024.53	LCDFGLAR	1.326	2.05	ni
NADH dehydrogenase subunit 3	ND3	226453482	1744.77	ANPYECGFDPTSSAR	2.039	3.91	ni
neurocalcin-delta isoform X1	Ncald	568990538	1395.67	LLQCDPSSAGQF	2.184	2.13	ni
non-lysosomal glucosylceramidase	Gba2	240120073	1859.82	DSQVYCEDTGGTEAVR	2.332	5.05	ni
N-terminal EF-hand calcium-binding protein 2 isoform X1	Necab2	568955953	1146.59	NCFHVAAVR	1.931	2.53	ni
nuclear pore membrane glycoprotein 210 isoform X1	Nup210	568942448	1491.73	SSNLLGECSPAQR	3.988	3.2	ni
nucleus accumbens-associated protein 1 isoform X4	Nacc1	568957419	1336.68	NTLANSCGTGIR	1.199	3.13	ni
paternally-expressed gene 3 protein	Peg3	58331166	1656.79	MCEETFVPSQSLR	2.025	3.75	ni
phosphomevalonate kinase isoform 2	Pmvk	254588058	1154.64	LGGNICALLR	1.988	3.24	ni
plasma membrane calcium ATPase 1 isoform X4	Atp2b1	568968339	953.53	TICLAFR	1.612	2.12	ni
polyadenylate-binding protein-interacting protein 1 isoform X3	Paip1	568984435	1462.74	IENVVLDANCSR	-	3.18	ni
predicted gene 5803	Gm5803	260304980	2038.96	SHFEQWGTLTDCVVMR	2.255	4.43	ni
proline-, glutamic acid- and leucine-rich protein 1	Pelp1	257900472	1334.66	NANSDVCAAALR	-	2.68	ni
protein canopy homolog 4 precursor	Cnpy4	30519939	1443.69	LEEALENLCER	0.745	2.3	ni
protein sel-1 homolog 1 isoform a precursor	Sel1l	84875513	1393.66	LWCATTYDYK	1.903	2.47	ni
protein tyrosine phosphatase, receptor type, N isoform X2	Ptprn	568907586	2494.19	LAALGPEGAHGDTTFEYQDLCR	2.033	5.35	ni
putative E3 ubiquitin-protein ligase UBR7	Ubr7	29789154	1168.51	CSYSQGSVGR	0.834	3.29	ni
ras-related protein Rab-3D isoform X1	Rab3d	568959035	1048.58	LVDIICDK	1.075	2.17	ni
ribonucleoside-diphosphate reductase large subunit	Rrm1	31982026	1438.69	NTAAMVCSLENR	1.38	4.52	ni
RING-box protein 2	Rnf7	110625597	1164.6	VQVMDACLR	1.895	2.38	ni
RNA polymerase II subunit A C-terminal domain phosphatase SSU	Ssu72	172088095	1306.67	VAVVCSSNQNR	2.085	2.27	ni
serine/threonine-protein phosphatase 4 regulatory subunit 2 isoform X1	Ppp4r2	568941622	1184.6	LCELLTDPR	1.39	2.82	ni
small nuclear ribonucleoprotein F	Snrpf	254028189	1124.6	CNNVLYIR	1.485	2.69	ni
solute carrier family 22 member 16	Slc22a16	110625794	1786.88	NFNLVCDQKWYAR	2.097	2.58	ni
striatin-4 isoform X1	Strn4	568946741	1287.66	TCVQEITAHR	4.295	2.29	ni
transcription elongation regulator 1 isoform X6	Tcerg1	569004234	1465.75	YLVLDCVPEER	1.896	2.51	ni
transcriptional repressor NF-X1 isoform 3	Nfx1	594190892	2507.12	SEDENTRPVAISHTDSSDASCR	2.231	3.76	ni
tRNA-splicing endonuclease subunit Sen15	Tsen15	228008361	1839.91	SDSKPTPGCSGPGPAPVR	1.885	4	ni
tubulin alpha-4A chain isoform X1	Tuba4a	568907654	1657.82	SIQFVDWCPTGFK	1.952	4.19	ni
tyrosine 3-monooxygenase isoform X1	Th	568952746	1287.66	VFQCTQYIR	2.717	2.3	ni
ubiquitin-conjugating enzyme E2 S	UBe2S	19527004	1718.86	LLTEIHGGACSTSSGR	1.966	2.61	ni
uncharacterized protein LOC75471	1700009N14Rik	124487358	1651.83	VCENIPIVLCGNK	-	3.8	ni
vitamin K epoxide reductase complex subunit 1 isoform X1	Vkorc1	568950796	1555.77	ALCDVGTAISCSR	-	3.74	ni
zinc transporter 7	Slc30a7	12963579	1876.94	TPPSLENTLPQCYQR	1.409	3.88	ni

## Sheet: Full proteome from Tg18 MIN6
Sample	Sample	Protein	accession #	MW	Number of cys-containing peptide	Seq	Spectral	Relative abundance (NSAF)
name	number			Da	#	Cov (%)	Counts
9.16.15	SB15-95-2	histone H2B type 1-B	28316760	14	8	0.53	178	1.26
CB gel	SB15-95-24	endoplasmin precursor	6755863	92	55	0.67	482	1.16
area 1+2	SB15-95-25	histone H2A type 1-F	30061379	14	7	0.36	152	1.1
aera 2	SB15-95-26	glyceraldehyde-3-phosphate dehydrogenase isoform 1	576080555	39	23	0.72	458	1
aera 4+5	SB15-95-27	78 glucose-regulated protein precursor	254540166	72	48	0.62	417	0.968
area 6+7	SB15-95-28	elongation factor 1-alpha 1	126032329	50	28	0.67	375	0.769
aera 8+9		histone H4	21361209	11	12	0.6	75	0.689
area 10+11		ATP-citrate synthase isoform 1	313151222	121	58	0.61	380	0.688
		heat shock protein HSP 90-alpha	6754254	85	59	0.67	311	0.659
		elongation factor 2	33859482	95	51	0.64	316	0.625
		actin, cytoplasmic 1	6671509	42	26	0.81	233	0.584
		protein disulfide-isomerase precursor	42415475	57	38	0.69	308	0.582
		transitional endoplasmic reticulum ATPase	225543319	89	43	0.61	234	0.523
		ubiquitin-40S ribosomal protein S27a-like isoform X1	755490905	18	10	0.41	70	0.513
		mesencephalic astrocyte-derived neurotrophic factor precursor	110625813	20	19	0.63	107	0.51
		ADP-ribosylation factor 1	194353962	21	14	0.66	102	0.489
		peptidyl-prolyl cis-trans isomerase A	6679439	18	13	0.75	88	0.479
		protein disulfide-isomerase A6 precursor	58037267	49	21	0.56	222	0.478
		heat shock cognate 71 protein	31981690	71	40	0.63	191	0.441
		hypoxia up-regulated protein 1 precursor	157951706	111	53	0.54	215	0.43
		tubulin beta-4B chain	22165384	50	33	0.83	203	0.43
		cofilin-1	6680924	19	14	0.7	81	0.419
		dihydropyrimidinase-related protein 2	40254595	62	32	0.74	191	0.409
		tubulin alpha-1A chain	6755901	50	26	0.67	183	0.398
		protein disulfide-isomerase A3 precursor	112293264	57	40	0.62	194	0.395
		clathrin heavy chain 1 isoform X1	568975333	192	86	0.61	338	0.394
		heat shock protein HSP 90-beta	40556608	83	40	0.67	176	0.39
		calmodulin	6680834	17	13	0.81	63	0.373
		pyruvate kinase PKM isoform M2	31981562	58	40	0.75	198	0.369
		protein disulfide-isomerase A4 precursor	86198316	72	43	0.53	145	0.358
		60S ribosomal protein L12	160333553	18	7	0.59	69	0.352
		nucleoside diphosphate kinase A	37700232	17	14	0.86	59	0.347
		ubiquitin-like modifier-activating enzyme 1 isoform 2	209862989	118	41	0.56	183	0.346
		alpha-actinin-4	11230802	105	47	0.64	151	0.331
		calnexin precursor	160333212	67	28	0.47	114	0.314
		annexin A6 isoform a	31981302	76	44	0.67	143	0.311
		eukaryotic translation initiation factor 5A-1	262359885	17	14	0.83	52	0.304
		coatomer subunit gamma-1 isoform 1	8567338	98	30	0.53	139	0.303
		ras-related protein Rab-1A	6679587	23	12	0.68	77	0.298
		bifunctional 3'-phosphoadenosine 5'-phosphosulfate synthase 2 isoform X1	569007203	70	36	0.61	149	0.296
		40S ribosomal protein S18	6755368	18	14	0.57	49	0.29
		heterogeneous nuclear ribonucleoprotein A3 isoform a	31559916	40	26	0.44	127	0.267
		ATP synthase subunit d, mitochondrial	21313679	19	12	0.76	54	0.265
		glutamine--fructose-6-phosphate aminotransferase [isomerizing] 1	7305085	77	34	0.64	119	0.264
		phosphoglycerate mutase 1	114326546	29	17	0.65	88	0.264
		staphylococcal nuclease domain-containing protein 1	77404392	102	40	0.6	118	0.263
		UDP-glucose:glycoprotein glucosyltransferase 1 precursor	236466498	176	66	0.59	200	0.262
		coatomer subunit alpha	226823359	138	51	0.57	156	0.258
		V-type proton ATPase catalytic subunit A	31560731	68	30	0.68	104	0.256
		histone H3.3C isoform X2	82886797	15	8	0.35	38	0.254
		14-3-3 protein epsilon	226874906	29	22	0.73	85	0.253
		60S ribosomal protein L26	6677777	17	14	0.45	46	0.252
		peptidyl-prolyl cis-trans isomerase B precursor	71774133	24	13	0.58	67	0.25
		peroxiredoxin-1	6754976	22	21	0.73	63	0.25
		CDK5 regulatory subunit-associated protein 2 isoform X10	755506225	28	17	0.72	80	0.249
		40S ribosomal protein S17	6677801	16	9	0.53	37	0.246
		glycerol-3-phosphate dehydrogenase, mitochondrial precursor	224922803	81	39	0.69	116	0.242
		40S ribosomal protein S8	6677813	24	12	0.55	65	0.239
		heat shock 70 protein 4	112293266	94	32	0.51	98	0.236
		ATP synthase subunit beta, mitochondrial precursor	31980648	56	25	0.7	139	0.233
		sarcoplasmic/endoplasmic reticulum calcium ATPase 2 isoform b	158635979	115	31	0.43	122	0.232
		stress-induced-phosphoprotein 1	14389431	63	25	0.41	99	0.23
		glycine--tRNA ligase	93102417	82	34	0.48	110	0.229
		calreticulin precursor	6680836	48	22	0.72	107	0.229
		alanine--tRNA ligase, cytoplasmic	34610207	107	33	0.53	109	0.228
		neutral alpha-glucosidase AB isoform 2 precursor	651164671	107	33	0.48	107	0.228
		ATP-dependent RNA helicase DDX3X	6753620	73	29	0.56	99	0.225
		protein DJ-1	55741460	20	16	0.79	54	0.225
		ras-related protein Rap-1b precursor	33859753	21	14	0.67	52	0.224
		40S ribosomal protein S7	6755376	22	13	0.62	55	0.223
		dolichyl-diphosphooligosaccharide--protein glycosyltransferase subunit 1 precursor	282398108	69	29	0.61	88	0.22
		high mobility group protein B1	407262920	25	14	0.5	63	0.22
		profilin-1	6755040	15	10	0.88	34	0.219
		alpha-enolase	158853992	47	24	0.66	109	0.218
		nucleolin	84875537	77	25	0.38	79	0.218
		14-3-3 protein zeta/delta isoform 1	359385696	28	14	0.56	70	0.218
		ADP/ATP translocase 2	22094075	33	17	0.44	70	0.217
		surfeit locus protein 4	6755698	30	5	0.25	46	0.216
		stress-70 protein, mitochondrial	162461907	73	25	0.47	96	0.215
		histidine triad nucleotide-binding protein 1	33468857	14	8	0.79	30	0.215
		coatomer subunit beta	15426055	107	31	0.48	102	0.214
		polyadenylate-binding protein 1	31560656	71	29	0.5	90	0.214
		electron transfer flavoprotein subunit beta	38142460	28	15	0.53	71	0.213
		heterogeneous nuclear ribonucleoprotein U	160333923	88	25	0.32	86	0.211
		ras-related protein Rab-7a	148747526	23	18	0.82	55	0.21
		stathmin	9789995	17	9	0.47	35	0.209
		C-1-tetrahydrofolate synthase, cytoplasmic	261878543	101	34	0.51	96	0.208
		myosin light polypeptide 6	33620739	17	10	0.76	35	0.207
		40S ribosomal protein S12	40254577	15	9	0.77	30	0.205
		myosin-9	114326446	226	68	0.41	197	0.204
		annexin A4	161016799	36	26	0.65	87	0.204
		40S ribosomal protein S16	158966704	16	11	0.58	33	0.204
		sodium/potassium-transporting ATPase subunit alpha-1 precursor	21450277	113	29	0.39	108	0.203
		DNA replication licensing factor MCM3	33859484	92	28	0.49	81	0.202
		protein canopy homolog 2 isoform X1	568968091	21	9	0.5	44	0.202
		destrin	9790219	19	14	0.7	37	0.202
		NADH-cytochrome b5 reductase 3	19745150	34	19	0.74	81	0.201
		phosphoglycerate kinase 1	70778976	45	26	0.77	94	0.198
		aconitate hydratase, mitochondrial precursor	18079339	85	29	0.48	101	0.197
		coatomer subunit beta'	29789080	102	29	0.52	92	0.197
		calcium-binding mitochondrial carrier protein Aralar1	27369581	75	27	0.6	88	0.197
		cytochrome c, somatic	6681095	12	10	0.6	23	0.197
		60S acidic ribosomal protein P2 isoform X1	568952442	12	9	0.97	25	0.196
		DNA replication licensing factor MCM2	172088119	102	29	0.48	87	0.195
		triosephosphate isomerase	226958349	32	15	0.62	74	0.195
		transgelin-2	30519911	22	16	0.77	49	0.194
		igE-binding protein-like, partial	755490861	49	11	0.24	54	0.193
		ATP synthase subunit O, mitochondrial precursor	20070412	23	12	0.63	52	0.193
		phosphoenolpyruvate carboxykinase [GTP], mitochondrial	28077029	73	26	0.53	85	0.191
		40S ribosomal protein S3	6755372	27	22	0.77	62	0.191
		40S ribosomal protein S14	31981100	16	9	0.41	32	0.191
		nucleoside diphosphate kinase B	117606270	17	6	0.75	32	0.19
		ferritin light chain 1	114326466	21	6	0.48	28	0.189
		glutathione S-transferase P 1	10092608	24	12	0.66	50	0.188
		peroxiredoxin-2	148747558	22	12	0.62	47	0.188
		eukaryotic initiation factor 4A-I isoform 1	21450625	46	24	0.67	86	0.187
		40S ribosomal protein S10	13399310	19	5	0.33	36	0.187
		60S ribosomal protein L32	25742730	16	11	0.5	28	0.187
		annexin A5	6753060	36	22	0.73	79	0.186
		60 heat shock protein, mitochondrial	183396771	61	34	0.76	120	0.184
		delta-1-pyrroline-5-carboxylate synthase isoform 1	255958292	87	33	0.51	97	0.184
		rho GDP-dissociation inhibitor 1	31982030	23	10	0.58	49	0.184
		CDGSH iron-sulfur domain-containing protein 1	19527228	12	7	0.57	22	0.184
		heterogeneous nuclear ribonucleoproteins A2/B1 isoform X1	755517048	37	23	0.58	86	0.183
		vesicle-trafficking protein SEC22b precursor	6755448	25	14	0.6	50	0.183
		protein transport protein Sec31A	244791271	134	34	0.39	109	0.179
		fatty acid synthase	93102409	272	76	0.46	220	0.178
		transmembrane emp24 domain-containing protein 10 precursor	21312062	25	11	0.48	48	0.176
		myosin regulatory light chain 12B	21728376	20	9	0.68	35	0.176
		small nuclear ribonucleoprotein Sm D2	58037145	14	7	0.47	23	0.176
		fatty acid-binding protein, epidermal isoform 1	6754450	15	12	0.78	26	0.174
		40S ribosomal protein S11	21426889	18	9	0.46	33	0.173
		bifunctional glutamate/proline--tRNA ligase isoform X1	568911608	171	46	0.42	138	0.172
		signal recognition particle subunit SRP68	47271535	71	27	0.5	71	0.172
		NADH-ubiquinone oxidoreductase 75 subunit, mitochondrial precursor	229892316	80	28	0.58	82	0.171
		tryptophan--tRNA ligase, cytoplasmic isoform 2	256818746	54	27	0.68	91	0.169
		programmed cell death 6-interacting protein isoform 3	258547156	96	23	0.44	73	0.169
		DNA replication licensing factor MCM7	10242373	81	31	0.54	80	0.169
		40S ribosomal protein S23	13195604	16	7	0.49	27	0.169
		ras-related protein Rab-2A	10946940	24	12	0.62	45	0.167
		ATP synthase subunit alpha, mitochondrial precursor	6680748	60	25	0.53	105	0.166
		GTP-binding nuclear protein Ran	568896389	24	12	0.45	46	0.166
		translocon-associated protein subunit delta isoform 1 precursor	262050625	19	5	0.36	33	0.166
		rab GDP dissociation inhibitor beta	116089273	51	29	0.81	81	0.165
		proteasome subunit alpha type-7 isoform 1	7106389	28	11	0.48	53	0.165
		ras GTPase-activating-like protein IQGAP1	242332572	189	50	0.46	134	0.164
		60S ribosomal protein L7	31981515	31	19	0.51	59	0.164
		ras-related protein Rab-3A	261862303	25	9	0.57	46	0.164
		exportin-2	12963737	110	27	0.37	78	0.163
		secretogranin-2 precursor	6677865	71	20	0.43	74	0.163
		mitochondrial 10-formyltetrahydrofolate dehydrogenase	283436218	102	28	0.47	75	0.163
		40S ribosomal protein S9	33504483	23	13	0.38	40	0.163
		protein transport protein Sec23B isoform 1	31980969	86	28	0.55	82	0.162
		60S ribosomal protein L27a	31560517	17	8	0.41	27	0.162
		40S ribosomal protein S19	12963511	16	10	0.48	26	0.162
		translationally-controlled tumor protein	6678437	19	6	0.65	35	0.16
		40S ribosomal protein S15a	24762230	15	8	0.66	23	0.159
		tubulin-specific chaperone A	6678225	13	7	0.64	19	0.159
		transketolase	6678359	68	19	0.39	83	0.158
		ras-related protein Rab-14	18390323	24	13	0.8	43	0.158
		heterogeneous nuclear ribonucleoprotein Q isoform 2	29788787	63	21	0.44	72	0.157
		matrin-3	25141233	95	18	0.33	66	0.156
		signal recognition particle 72	118344452	75	22	0.5	69	0.156
		phosphatidylethanolamine-binding protein 1	84794552	21	13	0.87	37	0.156
		glutathione S-transferase Mu 1	6754084	26	15	0.61	43	0.155
		40S ribosomal protein S13	13386034	17	9	0.52	26	0.155
		proteasome subunit beta type-1 precursor	7242197	26	13	0.55	47	0.154
		peroxiredoxin-5, mitochondrial precursor	6755114	22	10	0.56	36	0.154
		60S ribosomal protein L23	12584986	15	8	0.53	24	0.154
		cullin-associated NEDD8-dissociated protein 1	189409138	136	30	0.34	93	0.153
		DNA replication licensing factor MCM6	6678832	93	23	0.39	62	0.153
		filamin-B isoform b	145966915	277	74	0.45	196	0.152
		importin subunit beta-1	88014720	97	28	0.48	87	0.152
		40S ribosomal protein S3a	254553321	30	13	0.5	53	0.151
		GTP-binding protein SAR1a	21703344	22	12	0.42	38	0.151
		40S ribosomal protein S5	254675270	23	11	0.46	39	0.151
		heterogeneous nuclear ribonucleoprotein M isoform b	158186704	74	24	0.49	68	0.15
		eukaryotic translation initiation factor 2 subunit 1	13385624	36	21	0.65	63	0.15
		T-complex protein 1 subunit alpha isoform 1	110625624	60	26	0.64	94	0.149
		arginine--tRNA ligase, cytoplasmic	262118273	76	22	0.37	71	0.149
		eukaryotic translation initiation factor 3 subunit B	29789343	91	22	0.48	59	0.149
		DNA replication licensing factor MCM4	255918149	97	20	0.3	64	0.149
		cofilin-2	6671746	19	9	0.63	29	0.149
		deoxyuridine triphosphatase isoform 2	21281687	17	7	0.52	29	0.149
		60S ribosomal protein L30	254553337	13	6	0.57	19	0.149
		heterogeneous nuclear ribonucleoprotein K isoform 2	13384620	51	21	0.54	70	0.148
		heterogeneous nuclear ribonucleoprotein A1 isoform a	6754220	34	16	0.49	62	0.148
		vesicle-fusing ATPase	31543349	83	27	0.46	72	0.147
		peroxiredoxin-4 precursor	7948999	31	14	0.59	51	0.147
		histone H1.2	9845257	21	8	0.27	36	0.147
		peptidyl-prolyl cis-trans isomerase NIMA-interacting 1	12963653	18	7	0.7	27	0.147
		CAD protein isoform 1	51093867	243	59	0.42	160	0.146
		60S ribosomal protein L7a	7305443	30	18	0.45	52	0.146
		superoxide dismutase [Cu-Zn]	45597447	16	9	0.86	25	0.146
		lamin-B1	188219589	67	23	0.52	56	0.145
		guanine nucleotide-binding protein G(o) subunit alpha isoform B	164607137	40	14	0.48	65	0.145
		tropomyosin alpha-3 chain isoform Tpm3.1cy	359279904	29	19	0.55	48	0.145
		probable ATP-dependent RNA helicase DDX5 isoform X1	568971472	69	20	0.34	71	0.144
		60S ribosomal protein L10	16418339	25	11	0.4	39	0.144
		60S ribosomal protein L31	16716589	14	6	0.5	20	0.144
		cytoplasmic dynein 1 heavy chain 1	134288917	532	126	0.37	327	0.143
		26S proteasome non-ATPase regulatory subunit 2	19882201	100	27	0.46	83	0.143
		ubiquitin carboxyl-terminal hydrolase 5 isoform X1	568941433	93	19	0.38	60	0.143
		radixin isoform a	157277948	69	19	0.36	55	0.143
		60S ribosomal protein L27	8567400	16	7	0.49	22	0.143
		60S ribosomal protein L18a	58037465	21	10	0.51	32	0.143
		malate dehydrogenase, mitochondrial precursor	31982186	36	17	0.62	64	0.142
		chromogranin-A precursor	6680932	52	14	0.42	44	0.142
		60S ribosomal protein L23a	46430508	18	11	0.36	28	0.142
		60S acidic ribosomal protein P1	9256519	11	5	0.95	18	0.142
		ATP-dependent RNA helicase A	150456419	150	34	0.36	96	0.141
		trifunctional enzyme subunit alpha, mitochondrial precursor	33859811	83	22	0.35	71	0.141
		sec1 family domain-containing protein 1	58037481	72	18	0.42	59	0.14
		60S ribosomal protein L3	255308899	46	12	0.32	51	0.14
		tumor protein D52 isoform 3	70608214	22	10	0.6	37	0.14
		ubiquitin-conjugating enzyme E2 L3	568889996	18	7	0.53	24	0.14
		guanine nucleotide-binding protein subunit beta-2-like 1	6680047	35	17	0.74	59	0.139
		UMP-CMP kinase	165377065	26	11	0.47	40	0.139
		T-complex protein 1 subunit beta	126521835	57	22	0.59	84	0.138
		proteasome subunit alpha type-6	6755198	27	15	0.53	43	0.138
		serine/arginine-rich splicing factor 1 isoform 2	118582271	22	11	0.44	37	0.138
		proteasome subunit beta type-3	6755202	23	12	0.56	36	0.138
		pyridoxal-dependent decarboxylase domain-containing protein 1 isoform X4	568996709	87	23	0.4	68	0.137
		60S acidic ribosomal protein P0	6671569	34	18	0.58	58	0.137
		proteasome subunit alpha type-1	33563282	30	14	0.48	48	0.137
		poly(rC)-binding protein 1	6754994	37	11	0.65	57	0.134
		single-stranded DNA-binding protein, mitochondrial isoform 1	47059026	17	6	0.47	22	0.134
		ATP-dependent RNA helicase DDX1	19527256	83	30	0.5	65	0.133
		phosphate carrier protein, mitochondrial precursor	19526818	40	13	0.4	53	0.133
		signal peptidase complex subunit 2	13385134	25	15	0.48	38	0.133
		NADH dehydrogenase [ubiquinone] 1 alpha subcomplex subunit 8	21312012	20	6	0.47	26	0.133
		fructose-bisphosphate aldolase A isoform 1 precursor	293597567	45	21	0.61	65	0.132
		MICOS complex subunit Mic60 isoform 1	70608131	84	23	0.5	66	0.132
		importin-5	29789199	124	27	0.34	71	0.131
		general vesicular transport factor p115	23956096	107	25	0.41	62	0.131
		kinesin-1 heavy chain	61657921	110	21	0.34	62	0.131
		40S ribosomal protein S4, X isoform	6677805	30	15	0.46	46	0.131
		40S ribosomal protein S15	6677799	17	4	0.43	21	0.131
		eukaryotic translation initiation factor 3 subunit A	146219837	162	30	0.29	87	0.13
		thioredoxin-like protein 1	31543902	32	17	0.67	50	0.13
		ubiquitin-conjugating enzyme E2 N	18017605	17	7	0.53	22	0.13
		D-dopachrome decarboxylase	6753618	13	6	0.69	17	0.13
		alpha-soluble NSF attachment protein	13385392	33	13	0.68	51	0.129
		serine/arginine-rich splicing factor 3	8567402	19	8	0.45	27	0.129
		DNA replication licensing factor MCM5	112293273	82	24	0.48	62	0.128
		60S ribosomal protein L13a	31981945	23	13	0.41	33	0.128
		secretagogin	21703798	32	14	0.64	47	0.128
		AP-2 complex subunit beta isoform a	78711838	106	23	0.35	60	0.127
		alpha-actinin-1 isoform X4	568978634	106	24	0.54	57	0.127
		60S ribosomal protein L6 isoform X1	568936990	34	16	0.44	50	0.127
		malate dehydrogenase, cytoplasmic	254540027	37	15	0.46	56	0.126
		hydroxyacyl-coenzyme A dehydrogenase, mitochondrial precursor	111038118	34	15	0.75	52	0.125
		ADP/ATP translocase 1	148747424	33	9	0.44	42	0.125
		proteasome subunit alpha type-2	134031994	26	11	0.54	37	0.125
		prelamin-A/C isoform A precursor	162287370	74	20	0.4	60	0.124
		putative RNA-binding protein 3 isoform 2	261862339	17	6	0.44	21	0.124
		vesicle-associated membrane protein 2	6678551	13	5	0.6	16	0.124
		ribosome-binding protein 1 isoform a	124486712	158	27	0.25	92	0.123
		isocitrate dehydrogenase [NAD] subunit alpha, mitochondrial precursor	18250284	40	14	0.45	59	0.123
		splicing factor, proline- and glutamine-rich	23956214	75	14	0.29	43	0.123
		peroxiredoxin-6 isoform 1	6671549	25	13	0.66	35	0.123
		60S ribosomal protein L21	31560385	19	7	0.34	25	0.123
		eukaryotic translation initiation factor 1A	158631225	17	5	0.33	22	0.123
		fumarate hydratase, mitochondrial precursor	226823367	54	21	0.55	70	0.122
		elongation factor 1-gamma	110625979	50	19	0.59	61	0.122
		dynamin-1-like protein isoform b	71061455	78	21	0.43	56	0.122
		60S ribosomal protein L28	6677779	16	6	0.36	19	0.122
		peptidyl-prolyl cis-trans isomerase FKBP2 precursor	261824055	15	7	0.54	19	0.122
		4F2 cell-surface antigen heavy chain isoform a	238637277	62	16	0.34	45	0.121
		ras-related protein Rab-6A isoform 2	13195674	24	11	0.5	32	0.121
		coatomer subunit zeta-1	9789913	20	6	0.35	26	0.121
		ADP-ribosylation factor 5	6680722	21	6	0.64	27	0.121
		60S ribosomal protein L24	18250296	18	7	0.34	24	0.121
		prothymosin alpha	7110705	12	6	0.35	17	0.121
		aromatic-L-amino-acid decarboxylase	22094149	54	15	0.4	66	0.12
		lysine--tRNA ligase isoform 2	16716381	68	19	0.38	47	0.12
		60S ribosomal protein L13	33186863	24	7	0.29	33	0.12
		exportin-1	38604071	123	24	0.33	63	0.119
		sarcoplasmic/endoplasmic reticulum calcium ATPase 3 isoform a	254039658	110	20	0.34	59	0.119
		coatomer subunit epsilon	10946972	35	15	0.82	49	0.119
		proteasome subunit beta type-5	6755204	29	13	0.58	40	0.119
		hypoxanthine-guanine phosphoribosyltransferase	96975138	25	9	0.46	33	0.119
		transforming protein RhoA precursor	31542143	22	10	0.48	29	0.119
		ribonuclease inhibitor isoform a	285402638	50	21	0.74	61	0.118
		ras-related protein Rab-10	7710086	23	9	0.58	30	0.118
		vigilin	19527028	142	31	0.34	73	0.117
		succinate dehydrogenase [ubiquinone] flavoprotein subunit, mitochondrial precursor	54607098	73	18	0.4	51	0.117
		inorganic pyrophosphatase	27754065	33	18	0.66	45	0.117
		60S ribosomal protein L18	83699424	22	11	0.46	28	0.117
		ras-related protein Rab-21	33859751	24	10	0.47	33	0.117
		transferrin receptor protein 1	11596855	86	17	0.23	46	0.116
		voltage-dependent anion-selective channel protein 1	6755963	31	13	0.7	44	0.116
		14-3-3 protein beta/alpha	31543974	28	9	0.64	38	0.116
		T-complex protein 1 subunit zeta	6753324	58	21	0.51	68	0.115
		60S ribosomal protein L10a	255003735	25	8	0.35	32	0.115
		heterogeneous nuclear ribonucleoprotein A/B isoform 1	146260280	36	10	0.31	46	0.115
		40S ribosomal protein SA	224994260	33	12	0.58	39	0.115
		40S ribosomal protein S25	28372479	14	5	0.3	16	0.115
		transcription elongation factor B polypeptide 2	13385800	13	7	0.69	15	0.115
		nudC domain-containing protein 2 isoform 1	133922575	18	8	0.61	20	0.115
		aspartate aminotransferase, mitochondrial	6754036	47	19	0.57	58	0.114
		eukaryotic translation initiation factor 3 subunit L	51093840	67	13	0.31	58	0.114
		spermidine synthase	6678131	34	16	0.69	46	0.114
		transcription intermediary factor 1-beta	170295840	89	18	0.39	47	0.114
		activated RNA polymerase II transcriptional coactivator p15 isoform X1	568990402	14	6	0.31	16	0.114
		ATP synthase subunit e, mitochondrial	83715998	8	3	0.51	9	0.114
		AP-2 complex subunit alpha-1 isoform b	116256510	105	22	0.34	53	0.113
		glucosidase 2 subunit beta isoform X1	568959019	60	14	0.35	39	0.113
		ATP synthase F(0) complex subunit B1, mitochondrial isoform X1	755503270	27	12	0.53	33	0.113
		proteasome subunit alpha type-5	7106387	26	11	0.39	35	0.113
		T-complex protein 1 subunit gamma	6753320	61	22	0.46	68	0.112
		heterogeneous nuclear ribonucleoprotein L isoform X2	568944892	68	15	0.36	61	0.112
		GMP synthase [glutamine-hydrolyzing] isoform X1	755503682	82	20	0.39	55	0.112
		synaptic vesicle membrane protein VAT-1 homolog-like	33667095	46	18	0.58	53	0.112
		thioredoxin	6755911	12	5	0.4	13	0.112
		2-oxoglutarate dehydrogenase, mitochondrial isoform 3	356582489	116	24	0.38	56	0.111
		prolyl endopeptidase	6755152	81	22	0.44	52	0.111
		transmembrane emp24 domain-containing protein 9 precursor	145966911	27	11	0.35	33	0.111
		14-3-3 protein eta	6756037	28	9	0.61	36	0.111
		cytochrome c oxidase subunit II (mitochondrion)	34538601	26	6	0.45	32	0.111
		ras-related C3 botulinum toxin substrate 1 precursor	45592934	21	9	0.45	27	0.111
		cytochrome c oxidase subunit 5A, mitochondrial precursor	112181182	16	6	0.44	18	0.111
		lysosomal alpha-glucosidase precursor	226693367	106	18	0.2	81	0.11
		6-phosphogluconolactonase isoform 1	13384778	27	8	0.37	37	0.11
		endoplasmic reticulum resident protein 29 precursor	19526463	29	12	0.53	38	0.11
		receptor expression-enhancing protein 5	161016826	21	7	0.22	23	0.11
		60S ribosomal protein L35	13385044	15	5	0.37	15	0.11
		leucine--tRNA ligase, cytoplasmic	120537241	134	27	0.34	63	0.109
		serine/threonine-protein phosphatase 2A 65 regulatory subunit A alpha isoform	8394027	65	23	0.49	73	0.109
		myb-binding protein 1A	31982724	152	26	0.3	72	0.109
		T-complex protein 1 subunit eta	238814391	60	18	0.43	68	0.109
		threonine--tRNA ligase, cytoplasmic	27229277	83	20	0.34	52	0.109
		serine--tRNA ligase, cytoplasmic isoform 2	326381098	58	20	0.45	63	0.108
		low molecular weight phosphotyrosine protein phosphatase isoform 2	31542070	18	7	0.61	19	0.108
		pyruvate carboxylase, mitochondrial isoform 2	251823978	130	29	0.32	63	0.107
		T-complex protein 1 subunit delta	6753322	58	21	0.54	65	0.106
		valine--tRNA ligase	255069795	140	26	0.32	66	0.106
		rab GDP dissociation inhibitor alpha	33859560	51	19	0.75	54	0.106
		40S ribosomal protein S2	18087805	31	14	0.5	44	0.106
		ribose-phosphate pyrophosphokinase 1	10946854	35	15	0.57	45	0.106
		electron transfer flavoprotein subunit alpha, mitochondrial	227500281	35	15	0.62	47	0.106
		ubiquitin carboxyl-terminal hydrolase isozyme L1	188219614	25	10	0.6	30	0.106
		leucine-rich repeat-containing protein 59	19527026	35	13	0.5	43	0.105
		hematological and neurological expressed 1-like protein	39573709	20	6	0.56	26	0.105
		aldo-keto reductase family 1 member C13	171846276	37	15	0.67	45	0.104
		high mobility group protein B2 isoform X1	568955035	24	6	0.42	29	0.104
		ubiquitin carboxyl-terminal hydrolase isozyme L3	139948802	26	9	0.44	31	0.104
		hepatoma-derived growth factor	188497724	26	11	0.49	32	0.104
		ran-specific GTPase-activating protein	153792001	24	8	0.55	28	0.104
		dynactin subunit 1 isoform 3	311893360	137	27	0.34	63	0.103
		ERO1-like protein beta isoform X3	568981946	52	19	0.47	53	0.103
		60S ribosomal protein L9	14149647	22	7	0.48	25	0.103
		chromobox protein homolog 3	108860695	21	6	0.31	24	0.103
		60S ribosomal protein L36	160333837	12	4	0.3	12	0.103
		proteasome subunit beta type-2	227116345	23	9	0.47	26	0.102
		maleylacetoacetate isomerase isoform 1	6754092	24	8	0.56	28	0.102
		ras-related protein Rab-1B	21313162	22	7	0.76	26	0.102
		tripeptidyl-peptidase 2 isoform X1	568906168	138	27	0.33	62	0.101
		60S ribosomal protein L4	30794450	47	15	0.42	48	0.101
		endothelin-converting enzyme 1	40556286	85	15	0.29	38	0.101
		NADPH--cytochrome P450 reductase isoform X1	568938051	77	14	0.29	45	0.101
		alcohol dehydrogenase [NADP(+)]	10946870	37	15	0.63	44	0.101
		thioredoxin-related transmembrane protein 1 precursor	33859722	31	10	0.27	37	0.101
		cytosolic 5'-nucleotidase 3A isoform 2	356991161	34	15	0.57	40	0.101
		ADP-ribosylation factor 4	6680720	20	5	0.69	21	0.101
		transaldolase	33859640	37	16	0.45	45	0.1
		serine/threonine-protein phosphatase PP1-gamma catalytic subunit isoform X1	568936934	39	14	0.5	45	0.1
		CTP synthase 1	172072613	67	14	0.36	39	0.1
		prohibitin-2	126723336	33	13	0.5	40	0.1
		UPF0568 protein C14orf166 homolog	13386026	28	11	0.49	31	0.1
		CDGSH iron-sulfur domain-containing protein 2	21728370	15	5	0.42	15	0.1
		histone H2AX	7106331	15	3	0.32	16	0.1
		T-complex protein 1 subunit theta	126723461	60	27	0.58	62	0.0997
		cold-inducible RNA-binding protein	6680946	19	6	0.4	19	0.0995
		far upstream element-binding protein 2	163954948	77	15	0.3	49	0.0994
		V-type proton ATPase subunit E 1	45504359	26	10	0.39	30	0.0994
		cellular nucleic acid-binding protein isoform X1	568940541	19	8	0.4	21	0.0993
		V-type proton ATPase subunit G 1	15617197	14	6	0.42	13	0.0993
		40S ribosomal protein S6	755501126	29	11	0.28	33	0.0992
		3'(2'),5'-bisphosphate nucleotidase 1	39652626	33	11	0.5	36	0.0991
		eukaryotic translation initiation factor 3 subunit D	125628629	64	15	0.41	37	0.099
		NADH dehydrogenase [ubiquinone] 1 beta subcomplex subunit 7	13385322	16	6	0.59	15	0.0987
		signal peptidase complex catalytic subunit SEC11C	21313554	22	5	0.23	22	0.0986
		neurosecretory protein VGF isoform X1	568938125	68	14	0.41	40	0.0984
		microtubule-associated protein 1B	171543853	270	48	0.32	124	0.0983
		cytochrome c oxidase subunit 5B, mitochondrial	112807195	14	4	0.38	14	0.0978
		ras-related protein Rab-11B	6679583	24	10	0.49	27	0.0977
		phospholipase A-2-activating protein	114431250	87	22	0.37	51	0.0975
		nucleophosmin isoform 1	6679108	33	11	0.58	38	0.0974
		very long-chain specific acyl-CoA dehydrogenase, mitochondrial precursor	23956084	71	17	0.42	42	0.0972
		succinate dehydrogenase [ubiquinone] iron-sulfur subunit, mitochondrial precursor	34328286	32	12	0.45	35	0.0972
		membrane-associated progesterone receptor component 1	31980806	22	8	0.41	24	0.0971
		nucleolar protein 56	126090932	64	19	0.47	37	0.0968
		ubiquitin thioesterase OTUB1	19527388	31	11	0.56	35	0.0967
		26S proteasome non-ATPase regulatory subunit 1	74315975	106	17	0.28	45	0.0958
		E3 UFM1-protein ligase 1	227330590	90	18	0.29	50	0.0957
		eukaryotic translation initiation factor 1	22165347	13	5	0.5	12	0.0957
		dynein light chain Tctex-type 1F isoform 1	262231811	12	3	0.5	12	0.0957
		proteasome subunit beta type-4 precursor	254540082	29	9	0.5	32	0.0956
		AP-2 complex subunit sigma	161086984	17	5	0.36	15	0.0952
		microtubule-associated protein RP/EB family member 1	7106301	30	12	0.69	34	0.095
		histone H2A.V	256773209	14	3	0.31	14	0.095
		26S protease regulatory subunit 6B	124248577	47	17	0.54	45	0.0948
		ras GTPase-activating protein-binding protein 1	7305075	52	10	0.34	29	0.0947
		heterogeneous nuclear ribonucleoprotein D0 isoform a	116256512	38	12	0.32	39	0.0945
		serine hydroxymethyltransferase, mitochondrial isoform 1	21312298	56	19	0.58	54	0.0944
		alcohol dehydrogenase 1	6724311	40	13	0.47	46	0.0943
		40S ribosomal protein S26	255003793	13	3	0.31	12	0.094
		prefoldin subunit 2	31981577	17	5	0.4	16	0.0936
		ADP-ribosylation factor-like protein 1	153792526	20	6	0.51	21	0.0934
		dipeptidyl peptidase 3	244791124	83	18	0.41	45	0.0926
		peptidyl-prolyl cis-trans isomerase FKBP4	6753882	52	21	0.61	48	0.0923
		pyrroline-5-carboxylate reductase 1, mitochondrial	21450149	32	15	0.61	38	0.0921
		bolA-like protein 1 isoform X1	568923910	14	4	0.51	14	0.0921
		protein phosphatase 1 regulatory subunit 1A	10946734	19	7	0.53	21	0.092
		heterogeneous nuclear ribonucleoproteins C1/C2 isoform X1	568986754	34	10	0.41	34	0.0919
		ras-related protein Rab-18 isoform 2 precursor	30841008	23	8	0.48	24	0.0919
		sialic acid synthase	16716467	40	13	0.45	39	0.0916
		amine oxidase [flavin-containing] B	257196228	59	23	0.56	54	0.0915
		acetyl-CoA acetyltransferase, mitochondrial precursor	21450129	45	15	0.51	44	0.0914
		protein mago nashi homolog 2	256985211	17	6	0.51	15	0.0913
		non-POU domain-containing octamer-binding protein	255958247	55	16	0.51	45	0.0911
		phosphoserine aminotransferase isoform 1	54292132	40	15	0.52	45	0.0911
		gasdermin-A	10946666	50	17	0.52	46	0.0909
		small nuclear ribonucleoprotein Sm D1	6678055	13	4	0.45	12	0.0909
		mitochondrial 2-oxoglutarate/malate carrier protein	21312994	34	10	0.46	38	0.0906
		farnesyl pyrophosphate synthase isoform 1 precursor	359279938	48	13	0.36	49	0.0905
		60S ribosomal protein L8	6755358	28	10	0.41	31	0.0903
		dihydropteridine reductase	21312520	26	8	0.5	29	0.0903
		phenylalanine--tRNA ligase beta subunit	31981400	66	15	0.34	35	0.0902
		spectrin alpha chain, non-erythrocytic 1 isoform 2	295054266	285	53	0.33	110	0.0901
		chloride intracellular channel protein 1	15617203	27	10	0.54	29	0.0901
		eukaryotic translation initiation factor 6	27501448	27	7	0.47	28	0.0901
		40S ribosomal protein S24 isoform 1	46519156	15	4	0.3	13	0.0901
		glucose-6-phosphate isomerase	254553458	63	18	0.49	57	0.09
		aspartate--tRNA ligase, cytoplasmic isoform 1	211065507	57	20	0.49	51	0.0897
		proenkephalin-B preproprotein	148747390	28	11	0.43	28	0.0895
		60S ribosomal protein L15	13385036	24	7	0.34	23	0.0889
		AMP deaminase 2 isoform X1	568921518	95	12	0.19	36	0.0886
		asparagine--tRNA ligase, cytoplasmic isoform 2	219275596	64	14	0.33	48	0.0883
		60S ribosomal protein L37a	6677785	10	5	0.49	9	0.0882
		60S ribosomal protein L19 isoform 1	226958653	23	8	0.31	22	0.0881
		sorting nexin-2	13385878	58	10	0.24	30	0.0878
		protein BUD31 homolog isoform X1	568939000	17	6	0.41	14	0.0876
		signal recognition particle 19 protein	160333840	16	8	0.63	14	0.0876
		cystathionine beta-synthase isoform 1	21450071	62	17	0.52	55	0.0875
		mannosyl-oligosaccharide glucosidase	31981106	92	15	0.29	48	0.0874
		cAMP-dependent protein kinase type I-alpha regulatory subunit	30794476	43	11	0.38	38	0.0872
		transportin-1 isoform 2	115385966	101	19	0.32	51	0.087
		synaptojanin-2-binding protein	13384642	16	6	0.43	14	0.087
		NADH dehydrogenase [ubiquinone] iron-sulfur protein 3, mitochondrial precursor	58037117	30	8	0.3	31	0.0866
		heterogeneous nuclear ribonucleoprotein R isoform a	33859724	71	16	0.37	36	0.0865
		F-actin-capping protein subunit beta isoform d	407027854	29	14	0.5	30	0.0864
		glutathione peroxidase 1	84871986	22	8	0.57	22	0.0863
		leucine-rich PPR motif-containing protein, mitochondrial precursor	134031976	157	26	0.26	59	0.086
		spectrin beta chain, non-erythrocytic 1 isoform X2	568970049	273	41	0.27	100	0.0859
		thioredoxin-dependent peroxide reductase, mitochondrial precursor	6680690	28	11	0.47	28	0.0859
		dehydrogenase/reductase SDR family member 4 isoform 1	256220343	30	8	0.32	31	0.0858
		protein Niban	241982745	103	16	0.28	39	0.0855
		creatine kinase B-type	10946574	43	13	0.55	37	0.0855
		prohibitin	6679299	30	10	0.57	31	0.0853
		GDP-mannose 4,6 dehydratase	22122523	42	11	0.51	36	0.0852
		NADH dehydrogenase [ubiquinone] 1 alpha subcomplex subunit 12	27228985	18	6	0.47	14	0.0847
		3-hydroxyacyl-CoA dehydrogenase type-2	61888838	27	11	0.63	28	0.0846
		glutathione S-transferase Mu 5	6754086	27	9	0.46	24	0.0845
		protein transport protein Sec61 subunit beta	13324684	10	3	0.38	9	0.0845
		dihydrofolate reductase	7106289	22	8	0.58	20	0.0844
		neudesin precursor	13384818	19	6	0.47	16	0.0843
		fucose mutarotase isoform 2	555290089	18	5	0.57	15	0.084
		voltage-dependent anion-selective channel protein 2	6755965	32	11	0.55	33	0.0838
		U5 small nuclear ribonucleoprotein 200 helicase	40018610	245	36	0.25	88	0.0836
		116 U5 small nuclear ribonucleoprotein component isoform b	158508674	109	18	0.29	40	0.0835
		eukaryotic peptide chain release factor GTP-binding subunit ERF3A isoform 1	194018529	69	14	0.29	35	0.0835
		sorting nexin-3	31560433	19	8	0.42	15	0.0834
		40S ribosomal protein S20	13385652	13	2	0.23	11	0.0833
		proliferating cell nuclear antigen	7242171	29	10	0.59	29	0.0832
		T-complex protein 1 subunit epsilon	6671702	60	16	0.5	51	0.083
		translin	6755899	26	10	0.48	24	0.083
		NSFL1 cofactor p47 isoform a	38198665	41	13	0.49	35	0.0829
		protein HID1	29825825	89	16	0.3	43	0.0828
		transcription factor BTF3 isoform 2	281485611	18	5	0.61	17	0.0828
		lon protease homolog, mitochondrial precursor	116089322	106	14	0.3	38	0.0812
		V-type proton ATPase subunit B, brain isoform	19705578	57	17	0.49	47	0.081
		cytochrome b5 type B precursor	31542438	16	4	0.58	15	0.081
		ubiquitin-conjugating enzyme E2 variant 2 isoform 1	31543918	16	6	0.54	13	0.0808
		ATP-dependent 6-phosphofructokinase, platelet type isoform X1	568981400	80	15	0.29	39	0.0808
		phosphoserine phosphatase	19527116	25	8	0.51	23	0.0806
		proteasome subunit alpha type-4 isoform X1	568961543	29	11	0.62	28	0.0803
		ATP-binding cassette sub-family D member 3 isoform X1	568922111	67	10	0.26	36	0.0802
		extended synaptotagmin-1	33859650	122	17	0.24	43	0.0799
		elongation factor 1-beta	31980922	25	8	0.57	24	0.0799
		S-formylglutathione hydrolase isoform 2	13937355	31	8	0.49	30	0.0798
		ATP synthase subunit gamma, mitochondrial isoform b	163838648	30	9	0.35	29	0.0797
		thimet oligopeptidase	239916005	78	13	0.25	36	0.0796
		splicing factor 3B subunit 1	153791358	146	22	0.3	51	0.0794
		ADP-sugar pyrophosphatase isoform X2	568912477	29	9	0.43	28	0.0794
		26S proteasome non-ATPase regulatory subunit 6	46049022	46	13	0.46	35	0.0793
		TBC1 domain family member 15	255958202	77	14	0.28	35	0.0792
		ubiquitin-conjugating enzyme E2 K	31542956	22	7	0.37	20	0.0789
		adenine phosphoribosyltransferase	118601013	20	6	0.44	18	0.0789
		isoleucine--tRNA ligase, cytoplasmic	254553372	144	21	0.23	49	0.0788
		cytochrome c oxidase subunit 4 isoform 1, mitochondrial isoform 1	651165917	23	9	0.41	18	0.0787
		cysteine--tRNA ligase, cytoplasmic isoform 1	148747198	95	17	0.26	43	0.0786
		ADP-ribosylation factor GTPase-activating protein 3	30841021	58	11	0.28	33	0.0786
		splicing factor 3B subunit 3	19527174	136	20	0.23	47	0.0784
		lamina-associated polypeptide 2 isoform alpha	121949760	75	12	0.28	41	0.0784
		aspartate aminotransferase, cytoplasmic	160298209	46	11	0.36	37	0.0783
		60S ribosomal protein L5	23956082	34	10	0.35	31	0.0782
		calpain-2 catalytic subunit	157951598	80	19	0.4	36	0.0781
		ELAV-like protein 1	31542602	36	11	0.41	34	0.0781
		isocitrate dehydrogenase [NADP], mitochondrial precursor	225579033	51	16	0.4	40	0.078
		eukaryotic translation initiation factor 3 subunit C	22203755	106	14	0.17	35	0.0779
		ras-related protein Rab-27A	13128964	25	9	0.4	22	0.0778
		AP-1 complex subunit beta-1 isoform 1	339895913	105	11	0.36	37	0.0777
		polypyrimidine tract-binding protein 1 isoform 1	116517301	59	16	0.54	49	0.0775
		NADH dehydrogenase [ubiquinone] 1 beta subcomplex subunit 6	84781779	16	4	0.38	11	0.0774
		guanine nucleotide-binding protein G(I)/G(S)/G(T) subunit beta-2	13937391	37	12	0.52	35	0.0771
		splicing factor 3A subunit 1	165932270	89	12	0.22	30	0.0769
		serpin B6 isoform b	255759943	43	13	0.53	33	0.0769
		flap endonuclease 1	410025484	43	12	0.44	33	0.0765
		nucleolar protein 58	120407050	60	9	0.24	27	0.0765
		putative pre-mRNA-splicing factor ATP-dependent RNA helicase DHX15 isoform 2	110835723	91	16	0.24	40	0.0764
		aminoacyl tRNA synthase complex-interacting multifunctional protein 1	126012517	35	10	0.56	32	0.0764
		14-3-3 protein gamma	31543976	28	8	0.65	25	0.0764
		platelet-activating factor acetylhydrolase IB subunit gamma	6679201	26	8	0.27	23	0.0761
		UPF0556 protein C19orf10 homolog precursor	18250288	18	5	0.32	14	0.076
		NADH dehydrogenase [ubiquinone] 1 alpha subcomplex subunit 6	13385492	15	4	0.33	11	0.0757
		long-chain-fatty-acid--CoA ligase 5 isoform X1	569007473	76	15	0.29	34	0.0756
		transmembrane emp24 domain-containing protein 4 precursor	19527236	26	7	0.41	22	0.0756
		ubiquitin-fold modifier-conjugating enzyme 1	13384768	19	5	0.29	16	0.0756
		nucleobindin-2 precursor	194440700	50	16	0.52	36	0.0755
		PC4 and SFRS1-interacting protein isoform 1	19527168	60	8	0.16	30	0.0754
		60S ribosomal protein L11	13385408	20	6	0.28	17	0.0753
		28 heat- and acid-stable phosphoprotein	84781781	21	6	0.43	18	0.0753
		eukaryotic translation initiation factor 3 subunit E	45476573	52	15	0.44	38	0.0752
		serine/threonine-protein phosphatase 2A catalytic subunit beta isoform	8394024	36	11	0.51	31	0.0751
		purine nucleoside phosphorylase	7305395	32	9	0.43	29	0.0751
		NADH dehydrogenase [ubiquinone] 1 alpha subcomplex subunit 13	12963633	17	6	0.43	13	0.0751
		peptidyl-prolyl cis-trans isomerase FKBP1A isoform 1	6679803	12	3	0.42	9	0.0751
		tubulin beta-5 chain	7106439	50	5	0.77	31	0.075
		protease, serine, 1 precursor	16716569	26	2	0.11	14	0.075
		actin-related protein 2/3 complex subunit 2	112363072	34	12	0.59	30	0.0749
		transmembrane emp24 domain-containing protein 3 precursor	281427153	25	7	0.36	21	0.0749
		transcription factor BTF3 homolog 4	29789195	17	5	0.42	15	0.0749
		ran GTPase-activating protein 1	226051567	64	12	0.29	29	0.0747
		probable ATP-dependent RNA helicase DDX17 isoform 1	40068493	73	13	0.33	32	0.0745
		heterogeneous nuclear ribonucleoprotein L-like	110347535	64	13	0.33	29	0.0745
		adenylate kinase 2, mitochondrial isoform b	34328230	26	9	0.56	23	0.0744
		importin-7 isoform X1	568950272	119	14	0.2	38	0.0743
		acidic leucine-rich nuclear phosphoprotein 32 family member B	18700032	31	9	0.26	27	0.0743
		poly(rC)-binding protein 2 isoform 3	157042772	35	7	0.44	30	0.0743
		26S protease regulatory subunit 7	33859604	53	17	0.41	40	0.0742
		GPI inositol-deacylase	254028203	105	14	0.25	42	0.0741
		ATP-dependent 6-phosphofructokinase, liver type	31560653	85	14	0.26	38	0.074
		cystatin-B	6681071	11	3	0.57	8	0.0736
		adenosylhomocysteinase	262263372	48	12	0.42	36	0.0734
		F-actin-capping protein subunit alpha-2	6671672	33	11	0.56	28	0.0733
		cold shock domain-containing protein E1 isoform X1	568922622	86	15	0.22	37	0.0732
		cell division control protein 42 homolog isoform 1 precursor	6753364	21	4	0.37	17	0.0731
		signal recognition particle receptor subunit alpha	27229036	70	11	0.22	31	0.073
		60S ribosomal protein L17	161484662	21	6	0.32	17	0.0729
		phosphoribosylformylglycinamidine synthase	226958458	145	23	0.32	48	0.0728
		ragulator complex protein LAMTOR1	242332593	18	7	0.67	13	0.0728
		epididymal secretory protein E1 precursor	12963667	16	6	0.44	12	0.0726
		talin-1	227116327	270	38	0.27	91	0.0725
		adenylyl cyclase-associated protein 1	157951604	52	13	0.48	39	0.0725
		thyroid hormone receptor-associated protein 3 isoform X1	568928993	108	13	0.19	34	0.0725
		nuclear protein localization protein 4 homolog isoform A	303324586	68	12	0.29	29	0.0724
		prefoldin subunit 3	124248572	22	8	0.43	18	0.0724
		Golgi resident protein GCP60	229608928	60	9	0.26	25	0.0723
		DNA damage-binding protein 1 isoform X1	569006320	128	18	0.22	41	0.0722
		carboxypeptidase E precursor	22203763	53	13	0.39	39	0.0722
		mitochondrial import receptor subunit TOM22 homolog	31982091	16	5	0.58	13	0.0722
		ADP-ribosylation factor-like protein 8B	13385518	22	6	0.31	17	0.0721
		ADP-ribosylation factor 6	6680724	20	5	0.47	14	0.0721
		eukaryotic translation initiation factor 4 gamma 1 isoform a	56699432	176	21	0.21	57	0.072
		malectin precursor	188497650	32	11	0.46	28	0.072
		eukaryotic translation initiation factor 5	124430541	49	11	0.29	35	0.0719
		synaptobrevin homolog YKT6	31543971	22	9	0.57	18	0.0717
		guanylate kinase isoform X1	568971697	22	8	0.49	18	0.0717
		GTP-binding protein SAR1b	21313476	22	6	0.44	18	0.0717
		nuclear migration protein nudC	6754910	38	12	0.5	27	0.0716
		60S ribosomal protein L22 isoform b	459683845	18	5	0.32	12	0.0716
		proliferation-associated protein 2G4	6755100	44	12	0.38	32	0.0715
		catechol O-methyltransferase	161484634	29	8	0.39	24	0.0714
		magnesium-dependent phosphatase 1	12963663	19	5	0.4	13	0.0714
		peptidyl-prolyl cis-trans isomerase H isoform 1	158631194	19	6	0.4	14	0.0713
		serine-threonine kinase receptor-associated protein	160707896	38	12	0.51	33	0.071
		core histone macro-H2A.1 isoform 2	283945572	40	8	0.27	32	0.071
		mitochondrial pyruvate carrier 2	21312594	14	5	0.37	10	0.071
		profilin-2	9506971	15	5	0.49	11	0.0708
		xaa-Pro aminopeptidase 1	406855427	75	13	0.34	31	0.0707
		nucleosome assembly protein 1-like 4 isoform a	550822066	44	13	0.43	31	0.0707
		succinyl-CoA:3-ketoacid coenzyme A transferase 1, mitochondrial precursor	18266680	56	12	0.32	44	0.0706
		isochorismatase domain-containing protein 1	31541909	32	8	0.36	28	0.0706
		peptidyl-prolyl cis-trans isomerase FKBP11 precursor	15277331	22	5	0.23	18	0.0706
		trifunctional enzyme subunit beta, mitochondrial precursor	21704100	51	12	0.35	38	0.0705
		histone H1.5	21426893	23	8	0.23	21	0.0705
		transmembrane protein 263	61557491	12	4	0.58	9	0.0705
		tyrosine--tRNA ligase, cytoplasmic	411147387	63	19	0.36	45	0.0703
		2-oxoglutarate dehydrogenase-like, mitochondrial isoform X1	568987554	115	17	0.32	35	0.0703
		peptidyl-prolyl cis-trans isomerase FKBP3	7305061	25	7	0.32	21	0.0702
		heterogeneous nuclear ribonucleoprotein F	19527048	46	11	0.44	33	0.07
		cytochrome b-c1 complex subunit 2, mitochondrial precursor	22267442	48	14	0.55	36	0.07
		glia maturation factor beta	188528613	17	5	0.51	11	0.0698
		methionine--tRNA ligase, cytoplasmic isoform 2	51491852	101	14	0.23	31	0.0697
		sequestosome-1 isoform 1	6754954	48	11	0.53	34	0.0692
		mitochondrial dicarboxylate carrier	254826790	32	7	0.28	26	0.0692
		sepiapterin reductase	160333789	28	9	0.5	23	0.0692
		AP-3 complex subunit delta-1 isoform X1	568966499	136	17	0.21	41	0.0691
		phosphoglucomutase-2	227330633	61	20	0.57	44	0.069
		prostaglandin E synthase 3	568893112	19	5	0.37	14	0.069
		26S proteasome non-ATPase regulatory subunit 11	134053905	47	14	0.4	33	0.0689
		phosphatidylinositol-binding clathrin assembly protein isoform 2	357394959	71	10	0.25	29	0.0688
		vacuolar protein sorting-associated protein 35	13928670	92	15	0.21	36	0.0687
		3-ketoacyl-CoA thiolase A, peroxisomal precursor	18700004	44	13	0.53	33	0.0686
		GTP-binding protein Rheb precursor	28626508	20	8	0.34	14	0.0686
		nodal modulator 1 precursor	227908803	133	15	0.22	41	0.0685
		proteasome subunit alpha type-3	261824000	28	7	0.26	23	0.0683
		isocitrate dehydrogenase [NADP] cytoplasmic	162417975	47	11	0.33	32	0.0681
		heterogeneous nuclear ribonucleoprotein U-like protein 2	124487099	85	10	0.16	25	0.0681
		protein lin-7 homolog C	6755973	22	6	0.39	17	0.0681
		spliceosome RNA helicase Ddx39b	356995868	49	14	0.41	33	0.0679
		26S protease regulatory subunit 10B	27754103	44	11	0.42	30	0.0679
		26S protease regulatory subunit 6A	228008337	50	11	0.38	34	0.0678
		vesicle-associated membrane protein-associated protein B	31543940	27	5	0.31	22	0.0678
		neutral cholesterol ester hydrolase 1	30520239	46	8	0.31	30	0.0676
		adenylate kinase isoenzyme 1 isoform 1	10946936	23	5	0.34	18	0.0676
		AP-3 complex subunit beta-2	52317148	119	17	0.24	36	0.0675
		protein arginine N-methyltransferase 1 isoform 2	357197158	41	12	0.37	27	0.0674
		melanoma inhibitory activity protein 3 precursor	124001582	214	31	0.26	64	0.0673
		15 selenoprotein precursor	16716395	18	5	0.27	12	0.0667
		reticulon-3 isoform 4	16716353	25	6	0.37	20	0.0666
		dolichyl-diphosphooligosaccharide--protein glycosyltransferase subunit 2 precursor	34996495	69	11	0.26	44	0.0665
		glyoxylate reductase/hydroxypyruvate reductase	17933768	35	11	0.47	29	0.0662
		proteasome activator complex subunit 1	6755212	29	8	0.47	22	0.0662
		protein phosphatase 1 regulatory subunit 11	18390327	15	5	0.57	11	0.0662
		dnaJ homolog subfamily B member 11 precursor	110625998	41	8	0.28	27	0.0661
		ubiquitin carboxyl-terminal hydrolase isozyme L5 isoform 1	229577281	38	10	0.47	29	0.066
		MLV-related proviral Env polyprotein	755511141	70	8	0.12	41	0.0656
		NADH dehydrogenase [ubiquinone] 1 beta subcomplex subunit 11, mitochondrial	158631246	17	4	0.45	11	0.0656
		coatomer subunit delta	148747410	57	17	0.43	38	0.0655
		cyclin-dependent kinase 1	31542366	34	10	0.49	26	0.0655
		60S ribosomal protein L14	13385472	24	6	0.29	18	0.0654
		peptidyl-tRNA hydrolase 2, mitochondrial isoform b	149363634	20	5	0.39	15	0.0654
		14 phosphohistidine phosphatase	58037409	14	5	0.49	9	0.0654
		leucine-rich repeat-containing protein 47	41152116	64	11	0.35	25	0.0653
		pre-mRNA-processing-splicing factor 8	115583687	274	33	0.2	75	0.0652
		phosphomannomutase 2	8393988	28	13	0.49	20	0.0652
		fragile X mental retardation syndrome-related protein 1 isoform 1	163954941	76	14	0.34	29	0.065
		carbonyl reductase [NADPH] 1	113680352	31	11	0.55	24	0.0649
		cytochrome b-c1 complex subunit 7	13385726	14	5	0.43	8	0.0649
		ER membrane protein complex subunit 8	6754870	23	6	0.41	17	0.0648
		pappalysin 2 precursor	145699121	199	19	0.15	57	0.0646
		enoyl-CoA hydratase, mitochondrial precursor	29789289	31	6	0.27	24	0.0646
		probable D-tyrosyl-tRNA(Tyr) deacylase 2	31324532	18	5	0.51	12	0.0644
		prefoldin subunit 5	55741463	17	5	0.51	11	0.0644
		40S ribosomal protein S27	26024336	9	3	0.31	6	0.0644
		mitochondrial carrier homolog 2	9790055	33	10	0.48	26	0.0643
		lanosterol synthase	22122469	83	12	0.25	31	0.0642
		stromal cell-derived factor 2-like protein 1 precursor	11612505	24	5	0.5	18	0.0642
		NADH dehydrogenase [ubiquinone] 1 alpha subcomplex subunit 7	12963571	13	3	0.27	8	0.0638
		splicing factor 1 isoform 2	160707945	60	11	0.26	23	0.0637
		protein-L-isoaspartate(D-aspartate) O-methyltransferase	226530884	30	8	0.43	23	0.0636
		thioredoxin domain-containing protein 12 precursor	13384700	19	4	0.3	12	0.0636
		small nuclear ribonucleoprotein Sm D3	13385598	14	4	0.32	9	0.0635
		acidic leucine-rich nuclear phosphoprotein 32 family member E isoform 1	254587996	30	5	0.24	22	0.0634
		26S proteasome non-ATPase regulatory subunit 3	19705424	61	14	0.38	38	0.0632
		eukaryotic translation initiation factor 3 subunit J	124244040	29	10	0.59	22	0.0631
		ubiquitin-like protein 4A	21703810	18	5	0.4	11	0.0631
		cysteine-rich with EGF-like domain protein 2 precursor	21313278	38	8	0.24	27	0.063
		SEC23-interacting protein	254692911	111	13	0.19	31	0.063
		nuclease-sensitive element-binding protein 1	113205059	36	8	0.36	23	0.0629
		serine/arginine-rich splicing factor 6	224967104	39	7	0.22	22	0.0628
		eukaryotic initiation factor 4A-II isoform X2	568994601	46	9	0.67	29	0.0626
		UDP-glucose 4-epimerase	30409988	38	13	0.61	29	0.0626
		guanine nucleotide-binding protein-like 1	122937361	69	10	0.22	25	0.0625
		PEST proteolytic signal-containing nuclear protein isoform X3	568996518	19	5	0.36	14	0.0624
		dihydrolipoyl dehydrogenase, mitochondrial precursor	31982856	54	14	0.41	36	0.0623
		histidine--tRNA ligase, cytoplasmic	251823891	57	14	0.37	36	0.0623
		monofunctional C1-tetrahydrofolate synthase, mitochondrial precursor	283135110	106	14	0.22	30	0.0623
		V-type proton ATPase 116 subunit a isoform 1 isoform 1	12025532	96	13	0.2	27	0.0623
		chloride intracellular channel protein 4	7304963	29	9	0.5	21	0.0622
		mitochondrial import receptor subunit TOM70	27552760	68	11	0.26	25	0.0621
		eukaryotic initiation factor 4A-III	20149756	47	13	0.43	29	0.0618
		CDK5 regulatory subunit-associated protein 3	13384788	57	8	0.26	23	0.0618
		membrane-associated progesterone receptor component 2	226442772	23	6	0.38	17	0.0618
		proteasome activator complex subunit 2 isoform 2	71725358	26	7	0.35	19	0.0616
		gamma-aminobutyric acid receptor-associated protein-like 2	31542873	14	4	0.39	8	0.0616
		AP-1 complex subunit gamma-1 isoform 1	56744242	92	7	0.13	25	0.0615
		far upstream element-binding protein 1 isoform X14	568923196	68	10	0.27	26	0.0614
		dnaJ homolog subfamily C member 10 precursor	119508443	91	12	0.2	32	0.0613
		ADP-ribosylation factor-like protein 3 isoform X1	569007565	20	5	0.44	14	0.0613
		dnaJ homolog subfamily C member 3 precursor	31542563	57	15	0.48	35	0.0612
		signal recognition particle receptor subunit beta	6678137	30	9	0.48	22	0.0612
		alpha-centractin	8392847	43	9	0.47	26	0.0609
		citrate synthase, mitochondrial precursor	13385942	52	13	0.38	32	0.0608
		pyrroline-5-carboxylate reductase 2	19526878	34	10	0.51	26	0.0608
		endoplasmic reticulum resident protein 44 precursor	19072792	47	9	0.33	28	0.0608
		dihydrolipoyllysine-residue acetyltransferase component of pyruvate dehydrogenase complex, mitochondrial	257796245	68	9	0.22	29	0.0606
		sideroflexin-1	15147224	36	10	0.49	26	0.0605
		signal peptidase complex catalytic subunit SEC11A	9910550	21	4	0.26	12	0.0604
		FACT complex subunit SPT16	154350222	120	16	0.22	31	0.0601
		NADH dehydrogenase [ubiquinone] 1 subunit C2	18859597	14	3	0.34	8	0.0601
		glutamate dehydrogenase 1, mitochondrial precursor	6680027	61	16	0.43	38	0.06
		inosine-5'-monophosphate dehydrogenase 2	31981382	56	14	0.43	35	0.06
		translin-associated protein X	8394490	33	8	0.4	23	0.0599
		transcription elongation factor A protein 1 isoform 3	229094709	34	11	0.45	24	0.0599
		LDLR chaperone MESD precursor	228480219	25	5	0.33	17	0.0599
		large proline-rich protein BAG6 isoform 1	33147082	121	14	0.18	34	0.0598
		m7GpppX diphosphatase	21312256	39	8	0.34	27	0.0598
		LIM and SH3 domain protein 1 isoform X1	568971895	30	8	0.26	21	0.0598
		leukotriene A-4 hydrolase	116734870	69	12	0.27	24	0.0596
		puromycin-sensitive aminopeptidase	68226731	103	12	0.2	27	0.0595
		NADH dehydrogenase [ubiquinone] iron-sulfur protein 8, mitochondrial	406855423	24	4	0.23	16	0.0595
		lupus La protein homolog	158636012	48	12	0.34	28	0.0594
		cytoskeleton-associated protein 4	62526118	64	10	0.24	25	0.0594
		60S ribosomal protein L29	94363330	18	4	0.18	12	0.0592
		cAMP-dependent protein kinase catalytic subunit beta isoform 4	255958156	46	10	0.33	27	0.0591
		selenocysteine lyase	27804323	47	13	0.43	29	0.0591
		heat shock protein 105	114145505	96	9	0.14	25	0.0591
		calcyclin-binding protein	33468885	27	5	0.27	18	0.0589
		platelet-activating factor acetylhydrolase IB subunit beta	40254624	26	7	0.38	18	0.0589
		sorbin and SH3 domain-containing protein 2 isoform X19	755525446	168	23	0.22	58	0.0587
		casein kinase II subunit alpha	31542427	45	9	0.39	26	0.0586
		vesicular integral-membrane protein VIP36 precursor	34328278	40	11	0.44	28	0.0586
		thioredoxin domain-containing protein 17	13386060	14	4	0.44	8	0.0586
		OCIA domain-containing protein 2	58219050	17	4	0.27	10	0.0585
		src substrate cortactin isoform 1	75677414	61	10	0.23	21	0.0584
		dynamin-2 isoform 1	359751391	98	12	0.25	25	0.0583
		NAD(P)H-hydrate epimerase precursor	21553309	31	6	0.3	21	0.0583
		actin-related protein 2/3 complex subunit 4 isoform 1	13386054	20	3	0.18	12	0.0583
		plasma membrane calcium-transporting ATPase 1	62234487	135	15	0.2	35	0.0582
		ATP-binding cassette sub-family F member 1	39930335	95	12	0.29	24	0.0582
		histone H1.4	13430890	22	3	0.25	16	0.0582
		beta-crystallin B3	10946674	24	7	0.32	16	0.0581
		aldo-keto reductase family 1, member C19	282398141	37	8	0.46	25	0.058
		26S proteasome non-ATPase regulatory subunit 14	145966883	35	8	0.48	24	0.058
		UPF0585 protein C16orf13 homolog	58037115	23	5	0.41	15	0.058
		mannose-1-phosphate guanyltransferase beta	29244556	40	9	0.28	25	0.0579
		eukaryotic translation initiation factor 3 subunit K isoform 1	21312044	25	6	0.34	16	0.0579
		serine/threonine-protein kinase VRK1 isoform c	71067120	45	8	0.35	26	0.0578
		chromobox protein homolog 5	116008461	22	6	0.36	14	0.0578
		GCN1 general control of amino-acid synthesis 1-like 1	112807186	293	31	0.16	76	0.0577
		nardilysin precursor	31559918	133	15	0.15	33	0.0577
		estradiol 17-beta-dehydrogenase 12	9789991	35	9	0.41	24	0.0576
		pre-mRNA 3'-end-processing factor FIP1 isoform 1	227330595	65	9	0.3	22	0.0575
		vesicle-associated membrane protein 4	31543938	16	4	0.37	9	0.0575
		vesicle-associated membrane protein-associated protein A isoform X1	569000519	32	7	0.32	22	0.0574
		RNA-binding protein 39 isoform a	118403314	59	8	0.22	20	0.0573
		60S ribosomal protein L35a	15042947	13	3	0.21	7	0.0573
		coronin-7	148747331	101	14	0.24	26	0.0572
		phosphoribosyl pyrophosphate synthase-associated protein 1	254540089	42	9	0.37	29	0.0571
		eukaryotic translation initiation factor 3 subunit M	21703762	43	8	0.33	28	0.0568
		superoxide dismutase [Mn], mitochondrial precursor	31980762	25	4	0.25	16	0.0568
		malignant T-cell-amplified sequence 2	13384966	20	4	0.29	13	0.0566
		WD repeat-containing protein 61 isoform a	13277350	34	9	0.44	23	0.0565
		splicing factor U2AF 35 subunit isoform 1	254939694	28	6	0.37	18	0.0564
		proteasome subunit beta type-6 precursor	238231384	25	5	0.28	17	0.0563
		transcription elongation factor B polypeptide 1	21312712	12	3	0.38	7	0.0563
		LSM8 homolog, U6 small nuclear RNA associated	19527156	10	2	0.27	6	0.0563
		structural maintenance of chromosomes protein 2	62990166	134	17	0.21	33	0.0562
		26S proteasome non-ATPase regulatory subunit 13	6755210	43	9	0.28	24	0.0562
		26S protease regulatory subunit 4	6679501	49	11	0.33	28	0.0561
		poly [ADP-ribose] polymerase 1	20806109	113	13	0.22	28	0.056
		26S proteasome non-ATPase regulatory subunit 12	13385384	53	12	0.36	29	0.056
		signal recognition particle 54 protein	153791789	56	14	0.38	32	0.0559
		synapsin-1 isoform a	160707901	74	9	0.26	26	0.0559
		huntingtin-interacting protein K	27229055	15	4	0.43	8	0.0559
		FACT complex subunit SSRP1	111154063	81	10	0.19	26	0.0558
		protein SEC13 homolog	29150272	36	11	0.57	24	0.0558
		U2 small nuclear ribonucleoprotein A'	228480232	28	8	0.33	19	0.0558
		Sec24 related gene family, member C isoform 1	269954698	119	11	0.15	30	0.0555
		ras-related protein Rab-4B	21313012	24	6	0.41	15	0.0555
		ubiquitin-conjugating enzyme E2 D2	9910600	17	3	0.36	9	0.0552
		clathrin light chain A isoform a	122939192	24	6	0.26	16	0.055
		casein kinase II subunit beta isoform 2	7106277	25	7	0.42	15	0.055
		ras-related protein Rab-5A	13385374	24	4	0.27	15	0.055
		uridine 5'-monophosphate synthase	33859498	52	15	0.53	30	0.0549
		U1 small nuclear ribonucleoprotein A	114052106	32	7	0.27	21	0.0549
		nucleolar RNA helicase 2	72384374	94	13	0.21	23	0.0548
		ras-related protein Rab-5C	113866024	23	6	0.44	15	0.0548
		eukaryotic translation initiation factor 4B	167234372	69	10	0.2	22	0.0547
		ubiquilin-2	34328236	67	8	0.24	23	0.0547
		centromere/kinetochore protein zw10 homolog	22165349	88	12	0.23	28	0.0546
		aldose reductase	160707894	36	8	0.37	23	0.0545
		thioredoxin domain-containing protein 5 isoform 2	575771837	36	7	0.33	20	0.0545
		ectonucleoside triphosphate diphosphohydrolase 3	255683318	59	8	0.2	19	0.0545
		U5 small nuclear ribonucleoprotein 40 protein	115298670	39	9	0.47	26	0.0544
		NADH dehydrogenase [ubiquinone] iron-sulfur protein 6, mitochondrial precursor	56711244	13	4	0.44	7	0.0544
		26S protease regulatory subunit 8	7110703	46	11	0.45	25	0.0542
		tRNA-splicing ligase RtcB homolog	21703842	55	14	0.42	31	0.0541
		manganese-transporting ATPase 13A1	283135194	132	13	0.14	32	0.0541
		proteasome subunit beta type-7 precursor	6755206	30	6	0.33	20	0.0541
		NADH dehydrogenase [ubiquinone] flavoprotein 2, mitochondrial isoform 1 precursor	110625954	27	7	0.35	17	0.0541
		cytoplasmic dynein 1 light intermediate chain 1	22122795	57	13	0.36	32	0.0539
		60S ribosomal protein L34 isoform X2	149268895	13	3	0.15	7	0.0539
		WD repeat-containing protein 1	6755995	66	16	0.41	37	0.0538
		Parkinson disease 7 domain-containing protein 1 precursor	157841170	23	5	0.42	15	0.0538
		vesicle-associated membrane protein 7 isoform 1	33468929	25	6	0.33	15	0.0538
		actin-related protein 2/3 complex subunit 3	9790141	21	4	0.22	12	0.0538
		NADH dehydrogenase [ubiquinone] 1 beta subcomplex subunit 10	58037109	21	5	0.39	12	0.0538
		TAR DNA-binding protein 43 isoform 1	21704096	45	7	0.33	26	0.0537
		catenin alpha-1	6753294	100	10	0.22	24	0.0537
		aminopeptidase B isoform 1	227499103	72	10	0.22	23	0.0537
		clathrin interactor 1	154240730	68	8	0.15	22	0.0536
		serine/arginine-rich splicing factor 7 isoform 1	22122585	27	6	0.27	17	0.0535
		vacuolar ATPase assembly integral membrane protein Vma21 isoform 2	124486867	11	3	0.35	6	0.0535
		vesicle-associated membrane protein 8	31980629	11	2	0.23	6	0.0535
		obg-like ATPase 1 isoform a	21313144	45	9	0.37	24	0.0534
		mitochondrial fission 1 protein isoform 1	13384998	17	5	0.37	9	0.0534
		V-type proton ATPase subunit d 1	31981304	40	11	0.45	25	0.0533
		argininosuccinate lyase	19526986	52	10	0.26	28	0.0532
		hippocalcin-like protein 1 isoform X1	568977895	22	5	0.3	13	0.0531
		eukaryotic translation initiation factor 3 subunit I	9055370	36	9	0.45	23	0.053
		28S ribosomal protein S36, mitochondrial isoform 1	13384742	11	3	0.37	6	0.053
		V-type proton ATPase subunit H	31981588	56	14	0.43	29	0.0529
		ubiquitin-associated protein 2-like isoform 3	260166704	117	13	0.21	29	0.0529
		1,2-dihydroxy-3-keto-5-methylthiopentene dioxygenase	19527270	22	5	0.38	12	0.0529
		Golgi phosphoprotein 3	14140240	34	7	0.3	21	0.0528
		E3 ubiquitin-protein ligase NEDD4	56699423	103	9	0.14	23	0.0526
		condensin complex subunit 1	22165392	156	16	0.17	36	0.0525
		drebrin-like protein isoform 1	226423871	49	9	0.33	26	0.0525
		N(4)-(beta-N-acetylglucosaminyl)-L-asparaginase isoform 1 precursor	54292135	37	8	0.25	22	0.0524
		wolframin	6755997	101	13	0.2	23	0.0524
		mitochondrial import inner membrane translocase subunit Tim17-B	33468937	18	4	0.44	10	0.0524
		phosphatidylinositol transfer protein beta isoform isoform 1	675294839	32	8	0.44	19	0.0523
		aspartyl aminopeptidase isoform b	161016820	52	10	0.33	28	0.0521
		pyruvate dehydrogenase E1 component subunit beta, mitochondrial precursor	18152793	39	9	0.39	25	0.0521
		thymidylate kinase isoform 1	157785665	24	5	0.19	14	0.0521
		replication protein A 14 subunit	13386122	14	3	0.46	7	0.0521
		cysteine and histidine-rich domain-containing protein 1	13385324	37	11	0.53	23	0.052
		nuclear cap-binding protein subunit 2	13386056	18	4	0.28	9	0.052
		nuclear pore complex protein Nup93	27369533	93	14	0.25	28	0.0519
		AP-2 complex subunit alpha-2	163644277	104	12	0.28	24	0.0519
		ezrin	83921618	69	10	0.28	20	0.0518
		importin-9	112734861	116	9	0.18	27	0.0517
		cathepsin B preproprotein	6681079	37	7	0.29	23	0.0515
		26S proteasome non-ATPase regulatory subunit 7	6754724	37	8	0.39	22	0.0513
		SUMO-conjugating enzyme UBC9	294862305	18	4	0.27	9	0.0513
		replication protein A 70 DNA-binding subunit isoform 2	18390321	69	8	0.19	21	0.0512
		tumor protein D54 isoform b	31560247	24	6	0.4	15	0.0511
		UPF0160 protein MYG1, mitochondrial precursor	11096332	43	8	0.29	22	0.051
		transmembrane emp24 domain-containing protein 2	407263560	23	4	0.31	13	0.051
		NADH dehydrogenase [ubiquinone] iron-sulfur protein 5	568894089	13	3	0.32	6	0.051
		grpE protein homolog 1, mitochondrial precursor	13277394	24	5	0.35	14	0.0509
		pre-mRNA-processing factor 19 isoform 2	19527358	55	12	0.56	29	0.0507
		ribonucleoprotein PTB-binding 1	29789209	79	12	0.41	25	0.0507
		apoptosis regulator BAX isoform X1	568947240	19	4	0.34	11	0.0507
		26S proteasome non-ATPase regulatory subunit 9	119508441	25	7	0.36	15	0.0506
		MICOS complex subunit Mic19	21313618	26	6	0.28	15	0.0504
		ubiquitin-like modifier-activating enzyme 5	227499242	45	8	0.37	23	0.0503
		adapter molecule crk isoform 1	469832293	23	5	0.43	13	0.0501
		ATP-dependent 6-phosphofructokinase, muscle type isoform X2	568991691	93	10	0.19	28	0.05
		SUMO-activating enzyme subunit 2	7709986	71	12	0.31	21	0.05
		Golgin subfamily A member 5	312222675	82	12	0.23	24	0.05
		dolichyl-diphosphooligosaccharide--protein glycosyltransferase 48 subunit precursor	46195798	49	8	0.34	25	0.0499
		RNA-binding protein 14	86262142	69	9	0.18	22	0.0499
		plasminogen activator inhibitor 1 RNA-binding protein isoform 1	165932375	45	9	0.31	23	0.0498
		calcium/calmodulin-dependent protein kinase type II subunit delta isoform 3	18158420	54	9	0.24	27	0.0498
		ubiquilin-1 isoform 1	295054230	62	9	0.26	19	0.0496
		cytidine deaminase	58037289	16	3	0.34	8	0.0494
		STIP1 homology and U box-containing protein 1	9789907	35	7	0.33	20	0.0493
		SEC24 related gene family, member D	46560565	113	9	0.14	25	0.0491
		COP9 signalosome complex subunit 8	114158691	23	4	0.3	13	0.0491
		putative adenosylhomocysteinase 2	27734986	59	9	0.2	23	0.049
		bcl-2-like protein 13	23943828	47	5	0.22	14	0.049
		neuronal migration protein doublecortin isoform c	46575788	40	8	0.29	20	0.0489
		armadillo repeat-containing protein 10	13385536	33	8	0.43	20	0.0489
		MOB-like protein phocein	40254521	26	4	0.26	14	0.0489
		sorting nexin-12 isoform 3	160333829	19	5	0.42	9	0.0489
		small nuclear ribonucleoprotein-associated protein N	133725810	25	7	0.26	15	0.0488
		phosphoribosyl pyrophosphate synthase-associated protein 2 isoform a	21450169	41	8	0.25	23	0.0488
		caprin-1 isoform a	162329564	78	7	0.17	17	0.0488
		asparagine synthetase [glutamine-hydrolyzing]	33469123	64	12	0.29	31	0.0487
		RNA-binding protein FUS	20982845	53	7	0.22	25	0.0487
		serrate RNA effector molecule homolog isoform 1	13937395	100	9	0.15	21	0.0487
		transmembrane emp24 protein transport domain containing 7 precursor	255003819	25	4	0.21	14	0.0486
		nmrA-like family domain-containing protein 1 isoform 1	24431937	34	8	0.39	20	0.0485
		actin-related protein 3	23956222	47	9	0.36	23	0.0485
		cell cycle and apoptosis regulator protein 2	226958577	103	10	0.22	22	0.0484
		mannose-1-phosphate guanyltransferase alpha	19526884	46	9	0.3	23	0.0482
		tRNA (cytosine(34)-C(5))-methyltransferase	295054316	85	9	0.23	18	0.0482
		peptidyl-prolyl cis-trans isomerase NIMA-interacting 4	113931156	14	3	0.34	7	0.0482
		cell division cycle 5-like protein	22779899	92	9	0.2	19	0.0481
		elongation factor 1-delta isoform a	56699438	73	10	0.17	31	0.048
		beta-crystallin A2	10946978	22	4	0.27	12	0.048
		NADH dehydrogenase [ubiquinone] 1 beta subcomplex subunit 8, mitochondrial precursor	13385558	22	4	0.32	11	0.0479
		mitotic checkpoint protein BUB3	31560618	37	7	0.31	18	0.0478
		protein CDV3 isoform c	197313683	24	6	0.61	15	0.0478
		inosine triphosphate pyrophosphatase	31982664	22	5	0.37	12	0.0478
		cytochrome b-c1 complex subunit 1, mitochondrial precursor	46593021	53	12	0.46	26	0.0477
		histone H2A type 2-A	30061399	14	2	0.36	7	0.0477
		ruvB-like 2 isoform X1	568947527	51	9	0.25	25	0.0476
		4-aminobutyrate aminotransferase, mitochondrial isoform 2 precursor	283483966	50	9	0.37	24	0.0476
		delta-aminolevulinic acid dehydratase	34328485	36	10	0.49	21	0.0476
		heme oxygenase 2	209862939	36	11	0.5	20	0.0475
		bifunctional methylenetetrahydrofolate dehydrogenase/cyclohydrolase, mitochondrial isoform X2	568940988	36	7	0.29	21	0.0475
		tubulin--tyrosine ligase-like protein 12	269954711	74	10	0.22	20	0.0475
		gephyrin isoform 2	269973915	83	8	0.13	18	0.0475
		probable ATP-dependent RNA helicase DDX6	161016793	54	9	0.25	26	0.0474
		cytoplasmic aconitate hydratase	110347487	98	9	0.16	21	0.0474
		NEDD8-conjugating enzyme Ubc12 isoform 1	21704162	21	5	0.32	11	0.0474
		glutaredoxin-related protein 5, mitochondrial	21312153	16	4	0.39	8	0.0474
		elongator complex protein 1	158937298	150	16	0.2	31	0.0472
		apoptosis inhibitor 5	94158994	57	9	0.25	27	0.0472
		growth factor receptor-bound protein 2	6680083	25	5	0.25	13	0.0472
		macrophage migration inhibitory factor	6754696	13	3	0.36	6	0.047
		transcription elongation factor SPT5	22094123	121	11	0.17	25	0.0469
		syntaxin-binding protein 1 isoform a	165972307	69	10	0.19	22	0.0469
		phosphoglycolate phosphatase	40254507	35	6	0.26	20	0.0467
		transcriptional activator protein Pur-alpha isoform X1	569003429	35	6	0.32	17	0.0467
		oligoribonuclease, mitochondrial precursor	27229283	27	6	0.24	14	0.0466
		NADH-cytochrome b5 reductase 1	21312524	34	8	0.33	19	0.0466
		CTP synthase 2 isoform a	270483771	66	7	0.24	18	0.0466
		actin-related protein 2/3 complex subunit 1A	9790221	42	9	0.34	23	0.0465
		dehydrogenase/reductase SDR family member 7 precursor	226958616	38	9	0.35	21	0.0465
		septin-7 isoform X1	568959211	51	7	0.24	23	0.0464
		dolichol-phosphate mannosyltransferase subunit 1	6753670	29	5	0.29	16	0.0464
		SAP domain-containing ribonucleoprotein	13384730	24	6	0.34	13	0.0464
		NADH dehydrogenase [ubiquinone] iron-sulfur protein 4, mitochondrial	281485615	20	5	0.26	9	0.0463
		calpain small subunit 1	110227381	28	5	0.19	16	0.0462
		luc7-like protein 3 isoform X2	568975388	51	5	0.19	14	0.0462
		selenoprotein T precursor	143770878	22	4	0.29	10	0.0462
		carnitine O-palmitoyltransferase 2, mitochondrial precursor	162138915	74	9	0.22	20	0.0461
		neural cell adhesion molecule 1 isoform X1	568958938	124	10	0.15	27	0.046
		4-trimethylaminobutyraldehyde dehydrogenase precursor	115334671	56	12	0.33	27	0.0459
		histone deacetylase 6	194353997	126	11	0.19	26	0.0459
		programmed cell death protein 6 isoform X1	568983158	22	5	0.49	11	0.0459
		ATP-binding cassette sub-family E member 1	114205431	67	13	0.33	29	0.0458
		rRNA 2'-O-methyltransferase fibrillarin	31982373	34	7	0.33	20	0.0458
		6-phosphogluconate dehydrogenase, decarboxylating	124486895	53	9	0.26	25	0.0456
		gamma-soluble NSF attachment protein	110625902	35	8	0.26	19	0.0456
		histone-binding protein RBBP7	157909799	48	8	0.35	22	0.0456
		protein transport protein Sec23A isoform X1	568979157	86	9	0.21	23	0.0456
		regulation of nuclear pre-mRNA domain-containing protein 1A	21450083	36	9	0.4	19	0.0456
		cytoplasmic dynein 1 intermediate chain 2 isoform 3	311893378	71	9	0.26	19	0.0456
		nuclear mitotic apparatus protein 1	254675300	236	24	0.18	47	0.0455
		metastasis-associated protein MTA2	51491880	75	10	0.18	20	0.0455
		protein dpy-30 homolog	226246654	11	2	0.36	5	0.0455
		small glutamine-rich tetratricopeptide repeat-containing protein alpha isoform X1	568968038	34	7	0.32	19	0.0453
		protein FAM3C precursor	42734496	25	5	0.24	13	0.0452
		microtubule-associated protein 4 isoform 2	148747189	117	12	0.2	25	0.0451
		glutaminyl-tRNA synthetase isoform 1	269954677	88	13	0.21	23	0.0451
		trafficking protein particle complex subunit 3	7304929	20	5	0.3	9	0.0451
		ATP-binding cassette sub-family C member 8 isoform X8	568947584	177	16	0.14	35	0.0449
		X-ray repair cross-complementing protein 6	145587104	69	9	0.2	18	0.0449
		eukaryotic translation initiation factor 4 gamma 2 isoform 1	34486094	102	9	0.15	20	0.0448
		heterogeneous nuclear ribonucleoprotein A0	226443091	31	5	0.28	18	0.0448
		translocon-associated protein subunit alpha precursor	165377206	32	5	0.21	17	0.0448
		D-3-phosphoglycerate dehydrogenase	52353955	57	8	0.22	27	0.0446
		KH domain-containing, RNA-binding, signal transduction-associated protein 1	110626031	48	5	0.22	13	0.0446
		sec1 family domain-containing protein 2 isoform a	167900448	75	9	0.19	20	0.0444
		ras-related protein Rab-33B	8394133	26	5	0.23	13	0.0444
		CDP-diacylglycerol--inositol 3-phosphatidyltransferase	28076897	24	5	0.27	12	0.0444
		trifunctional purine biosynthetic protein adenosine-3 isoform X1	568997281	108	12	0.22	22	0.0442
		NADH dehydrogenase [ubiquinone] 1 beta subcomplex subunit 9	29789148	22	5	0.4	10	0.0441
		eukaryotic translation initiation factor 3 subunit G	31980808	36	6	0.36	16	0.044
		cyclin-dependent kinase inhibitor 1B	31542372	22	6	0.42	11	0.044
		pirin isoform 1	51317401	32	7	0.32	17	0.0439
		thymidylate synthase	46358062	35	7	0.37	18	0.0439
		signal peptidase complex subunit 3	21617845	20	3	0.2	10	0.0438
		39S ribosomal protein L23, mitochondrial isoform X1	568952702	17	3	0.35	7	0.0438
		syntaxin-12	19527102	31	5	0.26	16	0.0437
		S-phase kinase-associated protein 1	158854016	19	4	0.28	9	0.0435
		emerin	6679641	29	6	0.42	15	0.0434
		importin-4	19745156	119	13	0.18	23	0.0431
		tubulin beta-3 chain	12963615	50	8	0.6	22	0.0431
		alpha-N-acetylglucosaminidase precursor	254910995	83	11	0.22	21	0.0431
		kinesin light chain 2	133778983	68	8	0.17	18	0.0431
		leucine-rich repeat-containing protein 40 isoform a	31541911	68	9	0.21	17	0.0429
		lactoylglutathione lyase	165932331	21	4	0.29	10	0.0429
		programmed cell death protein 5	149247241	14	2	0.19	6	0.0429
		glucosamine 6-phosphate N-acetyltransferase isoform X1	568988218	21	4	0.43	10	0.0429
		cyclin-dependent kinase 4 inhibitor C	6680910	18	4	0.35	8	0.0429
		heterogeneous nuclear ribonucleoprotein D-like	148664250	46	9	0.26	24	0.0428
		ras GTPase-activating protein-binding protein 2 isoform a	124248568	54	4	0.14	14	0.0428
		retinol dehydrogenase 11 precursor	19482172	35	7	0.3	18	0.0427
		protein ERGIC-53 precursor	21312570	58	11	0.36	25	0.0426
		eukaryotic translation initiation factor 2 subunit 2	14149756	38	7	0.3	16	0.0426
		translocation protein SEC63 homolog	158937300	88	12	0.22	21	0.0426
		U1 small nuclear ribonucleoprotein 70 isoform X1	568947548	52	7	0.14	13	0.0426
		chromobox protein homolog 1 isoform X1	568971397	21	4	0.38	10	0.0426
		AP-2 complex subunit mu isoform 1	6753074	50	11	0.33	21	0.0425
		DNA (cytosine-5)-methyltransferase 3A isoform 1	418203928	102	8	0.13	19	0.0425
		histone H1.0	31560697	21	4	0.21	11	0.0425
		ribosomal protein L36A-like	13385038	12	3	0.22	5	0.0425
		cytosol aminopeptidase	255069715	56	11	0.32	25	0.0424
		ubiquitin carboxyl-terminal hydrolase 14 isoform 2	84452155	52	8	0.31	22	0.0423
		eukaryotic translation initiation factor 4H	15808988	27	9	0.48	14	0.0423
		protein transport protein Sec24B	46402179	136	10	0.13	26	0.0422
		eukaryotic translation initiation factor 3 subunit H	18079341	40	5	0.26	17	0.0422
		rho GTPase-activating protein 1 isoform 2	225543420	50	9	0.39	21	0.0421
		putative RNA-binding protein Luc7-like 2 isoform 1	283806681	47	7	0.23	21	0.0421
		fructose-2,6-bisphosphatase TIGAR	28892859	29	4	0.25	15	0.0421
		isoamyl acetate-hydrolyzing esterase 1 homolog	27754071	28	6	0.33	14	0.0421
		synaptosomal-associated protein 25 isoform b	597517936	23	6	0.47	11	0.0421
		secretogranin-1 precursor	6680934	78	6	0.13	14	0.042
		protein phosphatase 1G	6679793	59	7	0.23	15	0.042
		vinculin	31543942	117	11	0.14	22	0.0419
		NADH dehydrogenase [ubiquinone] iron-sulfur protein 2, mitochondrial precursor	23346461	53	7	0.23	22	0.0419
		ras-related protein Ral-A precursor	34328471	24	3	0.19	11	0.0419
		NADH dehydrogenase [ubiquinone] flavoprotein 1, mitochondrial precursor	19526814	51	11	0.34	22	0.0418
		actin-related protein 2/3 complex subunit 5	224809382	16	3	0.36	7	0.0418
		structural maintenance of chromosomes protein 3	36031035	142	12	0.14	25	0.0417
		acylpyruvase FAHD1, mitochondrial	12963697	25	4	0.34	12	0.0417
		COP9 signalosome complex subunit 6	33563284	36	8	0.42	18	0.0416
		isovaleryl-CoA dehydrogenase, mitochondrial precursor	9789985	46	9	0.4	20	0.0416
		cytochrome c1, heme protein, mitochondrial	13385006	35	7	0.42	18	0.0415
		glucosamine-6-phosphate isomerase 1	188219582	33	8	0.34	16	0.0415
		ATP-dependent RNA helicase DDX42	157838001	102	8	0.15	19	0.0415
		V-type proton ATPase subunit C 1	189339262	44	9	0.31	18	0.0415
		O-acetyl-ADP-ribose deacetylase 1	110625732	17	3	0.2	7	0.0415
		amphiphysin isoform 1	41281852	75	6	0.16	14	0.0414
		transmembrane protein 65	70778812	25	4	0.2	11	0.0414
		cleavage and polyadenylation specificity factor subunit 6 isoform X2	568967987	64	5	0.13	16	0.0412
		succinyl-CoA ligase [ADP/GDP-forming] subunit alpha, mitochondrial precursor	255958286	36	7	0.29	19	0.0411
		LETM1 and EF-hand domain-containing protein 1, mitochondrial precursor	9789997	83	9	0.23	20	0.0411
		THO complex subunit 4	6755763	27	4	0.31	14	0.0411
		acyl-protein thioesterase 1	6678760	25	5	0.31	12	0.0411
		acyl-protein thioesterase 2	7242156	25	5	0.3	12	0.041
		charged multivesicular body protein 5	13386442	25	5	0.26	12	0.041
		signal recognition particle 14 protein	568889013	13	3	0.3	5	0.041
		PHD finger-like domain-containing protein 5A	24415990	12	4	0.41	5	0.041
		RNA binding motif protein, X-linked-like-1	355390287	42	6	0.21	18	0.0409
		cTAGE family member 5 isoform 1	259155334	89	9	0.15	16	0.0409
		histone-lysine N-methyltransferase setd3	268370088	67	8	0.15	16	0.0409
		protein Red	33468955	66	6	0.14	15	0.0409
		ran-binding protein 3 isoform 1	357197128	59	6	0.16	15	0.0408
		ruvB-like 1	9790083	50	7	0.22	21	0.0406
		L-lactate dehydrogenase A chain isoform 1	6754524	36	7	0.23	18	0.0406
		band 4.1-like protein 3 isoform X7	568998914	162	13	0.14	29	0.0405
		inositol monophosphatase 1	31980942	30	6	0.29	15	0.0405
		ATPase Asna1	12025542	39	7	0.38	16	0.0405
		ras-related protein Rab-5B	28916687	24	4	0.27	11	0.0404
		prefoldin 4 isoform 1	158711747	15	3	0.29	6	0.0403
		elongator complex protein 2	134032030	93	12	0.2	22	0.0402
		drebrin isoform 1	293651556	77	5	0.13	14	0.0402
		alpha-1,3/1,6-mannosyltransferase ALG2	172072657	47	8	0.29	19	0.04
		basic leucine zipper and W2 domain-containing protein 1	13385296	48	8	0.29	19	0.0399
		dnaJ homolog subfamily A member 1	258547146	45	9	0.39	18	0.0399
		tubulin-folding cofactor B	170650659	27	6	0.38	13	0.0399
		trafficking protein particle complex subunit 6B	58037519	18	4	0.34	7	0.0399
		arsenite methyltransferase	119392105	42	8	0.31	17	0.0398
		sorcin isoform 1	124430537	22	4	0.21	10	0.0398
		protein PBDC1 isoform 1	13385810	22	4	0.24	10	0.0398
		SNW domain-containing protein 1	146149191	61	8	0.24	14	0.0397
		cullin-3	7710014	89	11	0.2	20	0.0395
		septin-9 isoform b	164698481	65	7	0.23	15	0.0395
		SH3 domain-binding glutamic acid-rich-like protein	9910548	13	3	0.41	5	0.0395
		peptidyl-prolyl cis-trans isomerase F, mitochondrial precursor	19527310	22	4	0.33	9	0.0394
		suppressor of G2 allele of SKP1 homolog	23956176	38	6	0.26	15	0.0393
		protein disulfide-isomerase A5 precursor	30794140	59	9	0.3	23	0.0392
		eukaryotic translation initiation factor 2 subunit 3, X-linked	6753738	51	10	0.36	21	0.0392
		U6 snRNA-associated Sm-like protein LSm4	159032056	15	3	0.2	6	0.0392
		alcohol dehydrogenase class-3 isoform 1	31982511	40	8	0.26	19	0.0391
		atlastin-3 isoform 2	254826718	61	9	0.3	24	0.0391
		glycylpeptide N-tetradecanoyltransferase 1 isoform X1	568972110	57	10	0.32	22	0.0391
		eukaryotic translation initiation factor 3 subunit F	225637531	38	6	0.22	16	0.039
		cell adhesion molecule 1 isoform b precursor	46575940	47	4	0.19	11	0.039
		Golgi to ER traffic protein 4 homolog isoform 1	27229052	37	6	0.24	17	0.0389
		heat shock protein 75 , mitochondrial precursor	13385998	80	9	0.23	18	0.0387
		centromere protein V	225703070	28	6	0.39	13	0.0386
		ES1 protein homolog, mitochondrial precursor	20070420	28	4	0.29	13	0.0385
		diphosphoinositol polyphosphate phosphohydrolase 3-alpha isoform X1	569008585	19	5	0.48	8	0.0385
		mitotic spindle assembly checkpoint protein MAD2A	31543218	24	4	0.2	10	0.0385
		filamin-A isoform 1	125347376	280	27	0.18	50	0.0384
		long-chain-fatty-acid--CoA ligase 4 isoform 1	46518528	79	12	0.23	18	0.0384
		pyruvate dehydrogenase E1 component subunit alpha, somatic form, mitochondrial precursor	6679261	43	8	0.32	17	0.0384
		alpha-taxilin	314122227	62	6	0.18	14	0.0384
		prenylated Rab acceptor protein 1	33859558	21	3	0.18	9	0.0384
		regulator of nonsense transcripts 1 isoform b	170784811	123	11	0.14	21	0.0383
		Golgi-specific brefeldin A-resistance guanine nucleotide exchange factor 1	52138536	207	18	0.16	35	0.0382
		cleavage and polyadenylation specificity factor subunit 5	13386106	26	5	0.22	11	0.0382
		biliverdin reductase A precursor	124487331	34	7	0.3	15	0.0381
		neuroendocrine convertase 2 precursor	6679229	71	8	0.15	16	0.0381
		integrin beta-1 precursor	45504394	88	5	0.098	15	0.0381
		coactosin-like protein	19482160	16	4	0.35	6	0.0381
		structural maintenance of chromosomes protein 4	29789347	147	11	0.11	24	0.0379
		E2/E3 hybrid ubiquitin-protein ligase UBE2O	50234896	141	12	0.17	24	0.0378
		DNA-(apurinic or apyrimidinic site) lyase isoform X1	568986519	35	6	0.4	16	0.0378
		HBS1-like protein isoform 1	110611222	75	9	0.2	17	0.0378
		NADH dehydrogenase [ubiquinone] 1 alpha subcomplex subunit 10, mitochondrial precursor	13195624	41	6	0.18	16	0.0378
		density-regulated protein	13386092	22	5	0.31	10	0.0378
		NADH dehydrogenase [ubiquinone] 1 alpha subcomplex subunit 9, mitochondrial precursor	254692859	43	11	0.41	19	0.0377
		very-long-chain enoyl-CoA reductase isoform 1	19923070	36	5	0.13	14	0.0377
		glyoxalase domain-containing protein 4	255003777	33	7	0.36	15	0.0377
		minor histocompatibility antigen H13 isoform 2	18034682	42	4	0.25	14	0.0377
		nucleolar and coiled-body phosphoprotein 1 isoform B	86198327	73	4	0.084	13	0.0377
		glucose-6-phosphate 1-dehydrogenase X	6996917	59	8	0.2	22	0.0376
		dnaJ homolog subfamily C member 9	23956266	30	7	0.32	13	0.0376
		BAG family molecular chaperone regulator 2	21703784	23	6	0.34	10	0.0376
		cleft lip and palate transmembrane protein 1 homolog	103472025	75	8	0.22	16	0.0374
		heterogeneous nuclear ribonucleoprotein H isoform X1	568975110	51	8	0.3	20	0.0373
		syntaxin-7	31560462	30	7	0.38	13	0.0373
		succinate dehydrogenase cytochrome b560 subunit, mitochondrial precursor	228008307	18	3	0.22	7	0.0373
		fragile X mental retardation protein 1 homolog isoform 1	51036613	69	5	0.11	15	0.0371
		NADP-dependent malic enzyme isoform 1	162139827	64	11	0.38	24	0.037
		DNA topoisomerase 1	112734855	91	6	0.12	14	0.037
		elongation factor Ts, mitochondrial precursor	21313468	35	7	0.45	16	0.037
		alpha-internexin	148539957	55	9	0.26	21	0.0369
		synaptic vesicle membrane protein VAT-1 homolog	33859662	43	7	0.27	17	0.0369
		protein OS-9 isoform 2 precursor	283837907	70	7	0.17	15	0.0369
		serine/threonine-protein phosphatase 6 catalytic subunit	21312758	35	6	0.3	15	0.0368
		calcium channel flower homolog isoform X1	568913942	14	2	0.19	6	0.0367
		nuclear cap-binding protein subunit 1	144922627	92	10	0.21	19	0.0365
		RNA-binding protein 8A isoform b	162287294	20	3	0.32	8	0.0365
		casein kinase II subunit alpha' isoform X1	568956067	41	7	0.32	17	0.0364
		ATP-binding cassette sub-family F member 3	29789050	80	10	0.24	17	0.0364
		V-type proton ATPase subunit D	12963799	28	7	0.37	12	0.0364
		acyl-coenzyme A thioesterase 13 isoform X1	755544316	11	2	0.3	4	0.0364
		proteasome assembly chaperone 1	9506555	33	5	0.2	14	0.0363
		mitochondrial import receptor subunit TOM34 isoform a	599044572	34	5	0.26	15	0.0363
		protein transport protein Sec61 subunit alpha isoform 1	8394252	52	7	0.21	23	0.0362
		redox-regulatory protein FAM213A	27229101	24	3	0.17	10	0.0362
		interleukin enhancer-binding factor 2	13385872	43	7	0.29	16	0.0361
		chromodomain-helicase-DNA-binding protein 4	39204553	218	19	0.16	34	0.036
		heat shock 70 protein 12A	28461135	75	9	0.17	16	0.036
		RNA-binding protein 47 isoform a	188497698	64	6	0.21	14	0.036
		clathrin light chain B isoform X1	568983719	25	4	0.14	11	0.036
		COP9 signalosome complex subunit 5 isoform 1	7304971	38	8	0.41	16	0.0359
		reticulocalbin-2 isoform 1 precursor	114205428	37	6	0.27	13	0.0358
		vacuolar protein-sorting-associated protein 25 isoform 2	25092662	21	3	0.19	8	0.0358
		ubiquitin-protein ligase E3C	29789341	124	8	0.12	19	0.0356
		protein RCC2	33239431	56	9	0.25	21	0.0356
		hsc70-interacting protein	19526912	42	7	0.22	15	0.0356
		heterochromatin protein 1-binding protein 3 isoform 1	171846285	61	8	0.19	13	0.0356
		proteolipid protein 2	9790169	17	2	0.18	6	0.0356
		vesicle transport through interaction with t-SNAREs homolog 1B	31980617	27	4	0.24	11	0.0355
		5'(3')-deoxyribonucleotidase, cytosolic type	7657031	23	3	0.17	9	0.0355
		prefoldin subunit 6	297747288	14	3	0.18	5	0.0355
		thioredoxin reductase 1, cytoplasmic isoform 2	110224442	55	8	0.3	20	0.0353
		transcriptional activator protein Pur-beta	6755252	34	4	0.33	13	0.0353
		seizure 6-like protein 2 isoform 1 precursor	21450331	99	7	0.15	16	0.0352
		NHP2-like protein 1	377837185	14	2	0.22	5	0.0352
		elongation factor Tu, mitochondrial isoform 1	27370092	50	6	0.22	18	0.0351
		signal peptidase complex subunit 3	125988403	20	3	0.18	8	0.0351
		coiled-coil domain-containing protein 115	58037169	20	6	0.42	8	0.0351
		histone H2B type 3-B	46049029	17	2	0.42	6	0.0351
		apoptosis-inducing factor 1, mitochondrial isoform 2	594150372	66	7	0.15	14	0.035
		sorting nexin-1	71043944	59	8	0.2	12	0.035
		NADH dehydrogenase [ubiquinone] 1 beta subcomplex subunit 4	149266669	15	2	0.27	5	0.0349
		mitochondrial glutamate carrier 1	21311845	35	7	0.41	15	0.0348
		DNA ligase 1	133892266	104	8	0.16	16	0.0348
		splicing factor 3b, subunit 2	268837785	98	6	0.14	15	0.0347
		GMP reductase 1	17975500	37	7	0.24	16	0.0347
		astrocytic phosphoprotein PEA-15 isoform 2	21426847	15	2	0.17	5	0.0347
		polyadenylate-binding protein 4 isoform 2	22507391	68	6	0.27	14	0.0346
		stomatin-like protein 2, mitochondrial	12963591	38	5	0.29	14	0.0346
		Golgi apparatus protein 1 precursor	6677905	134	11	0.11	20	0.0345
		isocitrate dehydrogenase 3, beta subunit	18700024	42	7	0.23	15	0.0344
		myristoylated alanine-rich C-kinase substrate	6678768	30	5	0.24	7	0.0344
		uncharacterized protein FLJ45252 homolog	568943658	38	4	0.19	6	0.0344
		protein sel-1 homolog 1 isoform b precursor	46309573	82	6	0.14	15	0.0342
		calcium/calmodulin-dependent 3',5'-cyclic nucleotide phosphodiesterase 1C isoform c	229577068	71	6	0.13	14	0.0342
		V-type proton ATPase 16 proteolipid subunit	6753144	16	2	0.32	6	0.0342
		RNA-binding protein EWS isoform X2	568969860	70	4	0.11	15	0.0341
		transmembrane 9 superfamily member 4 precursor	31542095	75	4	0.065	14	0.0341
		RNA polymerase II-associated factor 1 homolog	31980912	61	6	0.2	12	0.0341
		mitochondrial import inner membrane translocase subunit TIM50 precursor	22094989	40	6	0.23	16	0.0339
		26S proteasome non-ATPase regulatory subunit 8	156713423	40	6	0.25	16	0.0339
		protein kinase C alpha type	164663791	77	7	0.18	15	0.0339
		synaptotagmin-like protein 4 isoform X1	569011369	76	8	0.14	15	0.0338
		tubulin beta-2A chain	33859488	50	4	0.69	17	0.0337
		nucleosome assembly protein 1-like 1 isoform 1 precursor	226443026	49	5	0.17	16	0.0337
		AP-3 complex subunit mu-1	254281313	47	5	0.21	16	0.0337
		DDRGK domain-containing protein 1 precursor	110350660	36	4	0.29	12	0.0336
		RWD domain-containing protein 4	45356139	21	3	0.29	8	0.0336
		serine/threonine-protein phosphatase 2A 55 regulatory subunit B alpha isoform isoform 1	110625886	52	6	0.19	17	0.0335
		NADH dehydrogenase [ubiquinone] 1 beta subcomplex subunit 5, mitochondrial precursor	27754144	22	3	0.16	7	0.0334
		cyclin-dependent kinase 5	6680908	33	7	0.33	13	0.0333
		COP9 signalosome complex subunit 3	6753488	48	7	0.26	16	0.0333
		acidic leucine-rich nuclear phosphoprotein 32 family member A	40254600	29	3	0.26	11	0.0333
		AP-1 complex subunit mu-1 isoform X1	568955180	46	5	0.16	15	0.0333
		phosphatidylinositol transfer protein alpha isoform	6679337	32	6	0.3	12	0.0332
		3-hydroxyisobutyryl-CoA hydrolase, mitochondrial precursor	22122625	43	8	0.31	17	0.0331
		plastin-3 isoform X1	569009527	72	7	0.15	14	0.0331
		tether containing UBX domain for GLUT4 isoform 1	30794438	60	7	0.27	12	0.0331
		peptidyl-prolyl cis-trans isomerase D	13385854	41	7	0.31	14	0.033
		major vault protein isoform X1	755523315	96	8	0.18	14	0.033
		NAD-dependent malic enzyme, mitochondrial precursor	21703972	66	10	0.34	22	0.0329
		GDP-L-fucose synthase	13654268	36	4	0.17	12	0.0329
		lysosome-associated membrane glycoprotein 2 isoform 2 precursor	31543108	46	3	0.08	9	0.0329
		SWI/SNF-related matrix-associated actin-dependent regulator of chromatin subfamily A member 5	40254124	122	10	0.1	17	0.0328
		aminoacyl tRNA synthase complex-interacting multifunctional protein 2 isoform 1	288541337	35	5	0.28	14	0.0328
		toll-interacting protein	13591860	30	5	0.24	12	0.0328
		actin, alpha skeletal muscle	33563240	42	2	0.32	14	0.0327
		peptidyl-prolyl cis-trans isomerase-like 1	21312784	18	2	0.16	6	0.0326
		COMM domain-containing protein 3	22296603	22	4	0.26	8	0.0324
		SWI/SNF complex subunit SMARCC2 isoform 2	166235123	125	8	0.15	18	0.0323
		complement component 1 Q subcomponent-binding protein, mitochondrial	112181167	31	4	0.19	12	0.0322
		ATP synthase subunit delta, mitochondrial precursor	166851828	18	2	0.14	6	0.0322
		tubulin alpha-1B chain	34740335	50	3	0.67	15	0.0321
		microtubule-associated protein RP/EB family member 3 isoform X1	568933537	32	7	0.35	12	0.032
		guanine nucleotide-binding protein G(i) subunit alpha-2	41054806	40	8	0.37	15	0.032
		nucleoside diphosphate kinase 3 precursor	255308888	19	3	0.31	6	0.032
		5'-nucleotidase domain-containing protein 2 isoform X1	568988697	64	9	0.26	20	0.0319
		sodium/potassium-transporting ATPase subunit beta-1	6753138	35	5	0.24	11	0.0319
		septin-2 isoform a	228480251	42	5	0.23	13	0.0317
		NADH dehydrogenase [ubiquinone] iron-sulfur protein 7, mitochondrial precursor	21312950	25	3	0.14	9	0.0317
		acid ceramidase precursor	9790019	45	7	0.16	16	0.0316
		importin subunit alpha-1	6754474	58	6	0.2	19	0.0316
		histone H1.1	21426823	22	2	0.19	9	0.0316
		nucleoporin NUP53 isoform 2	298231198	33	7	0.34	13	0.0316
		prenylcysteine oxidase precursor	13385294	56	7	0.25	18	0.0314
		cleavage stimulation factor subunit 2	18875338	61	6	0.18	12	0.0314
		structural maintenance of chromosomes protein 1A	258613892	143	12	0.13	19	0.0313
		COP9 signalosome complex subunit 2 isoform a	551895128	52	8	0.32	16	0.0313
		presequence protease, mitochondrial precursor	21699068	117	9	0.16	16	0.0313
		non-specific lipid-transfer protein	45476581	59	8	0.11	19	0.0313
		actin-related protein 2	22122825	45	6	0.16	14	0.0313
		activator of 90 heat shock protein ATPase homolog 1	22122515	38	5	0.29	12	0.0313
		serine/arginine repetitive matrix protein 1 isoform X5	568931588	102	7	0.14	14	0.0313
		pyridoxal kinase	26006861	35	6	0.26	13	0.0312
		eukaryotic translation initiation factor 4E	83627717	25	3	0.12	9	0.0312
		ADP-ribosylation factor-binding protein GGA1	22122347	70	6	0.18	13	0.0311
		cleavage and polyadenylation specificity factor subunit 3	31980904	78	7	0.13	14	0.0311
		proteasome activator complex subunit 3 isoform X1	568972276	31	4	0.19	11	0.0311
		basigin isoform 2 precursor	116014342	30	5	0.28	11	0.0311
		coiled-coil domain-containing protein 47 precursor	125628650	56	9	0.23	17	0.031
		endoplasmic reticulum-Golgi intermediate compartment protein 1	13385678	33	4	0.15	12	0.031
		protein arginine N-methyltransferase 5	188528624	73	6	0.13	13	0.031
		phosphoacetylglucosamine mutase isoform 1	255522939	59	8	0.22	19	0.0309
		Golgin subfamily A member 3	31982330	163	13	0.13	22	0.0308
		guanine nucleotide-binding protein G(I)/G(S)/G(T) subunit beta-1	229608938	37	5	0.44	14	0.0308
		neurofilament light polypeptide	39204499	62	7	0.19	11	0.0308
		transcription elongation factor SPT4-B	7949148	13	2	0.21	4	0.0308
		unconventional myosin-Va	115511052	216	13	0.098	28	0.0307
		isocitrate dehydrogenase [NAD] subunit gamma 1, mitochondrial isoform X1	569009751	42	5	0.27	14	0.0307
		dynactin subunit 2 isoform 3	28076935	44	5	0.17	14	0.0307
		transthyretin precursor	7305599	16	2	0.16	5	0.0307
		ubiquitin-conjugating enzyme E2 variant 1	42741690	16	2	0.54	5	0.0307
		N-acylneuraminate cytidylyltransferase	247269309	48	5	0.18	15	0.0306
		ER membrane protein complex subunit 1 isoform 1 precursor	31542273	112	9	0.16	15	0.0305
		N-alpha-acetyltransferase 15, NatA auxiliary subunit	225543482	101	8	0.097	14	0.0305
		heat shock 70 protein 4L isoform X2	568921289	112	6	0.11	15	0.0305
		mitochondrial peptide methionine sulfoxide reductase isoform 1	31981013	26	5	0.27	9	0.0305
		replication protein A 32 subunit	110625961	29	5	0.21	11	0.0305
		COP9 signalosome complex subunit 4	6753490	46	6	0.24	14	0.0304
		chromatin target of PRMT1 protein isoform 3	31981251	24	3	0.19	9	0.0304
		tumor protein p53-inducible protein 11 isoform X2	568917358	22	3	0.13	7	0.0304
		syntaxin-5	268370181	40	5	0.24	14	0.0303
		protein MEMO1	19526994	34	7	0.37	12	0.0303
		tropomyosin alpha-4 chain	47894398	28	6	0.29	10	0.0302
		26S proteasome non-ATPase regulatory subunit 4 isoform 1	530537251	41	5	0.2	13	0.0302
		Y-box-binding protein 3 short isoform	20806532	31	4	0.44	10	0.0302
		tropomyosin alpha-1 chain isoform Tpm1.9cy	256000790	29	5	0.35	10	0.0302
		platelet-activating factor acetylhydrolase IB subunit alpha	7305363	47	5	0.2	14	0.0301
		aldo-keto reductase family 1, member C12	85719330	37	6	0.67	13	0.0301
		glutamate--cysteine ligase regulatory subunit	6680019	31	5	0.23	11	0.0301
		GPI transamidase component PIG-S	41351529	62	5	0.16	11	0.0301
		succinyl-CoA ligase [ADP-forming] subunit beta, mitochondrial isoform X1	568987140	54	8	0.23	17	0.03
		protein FAM49B	21450053	37	5	0.26	13	0.03
		dual specificity protein phosphatase 23	55926215	17	3	0.2	5	0.03
		protein SET isoform 1	13591862	33	5	0.18	11	0.0299
		secernin-1	38044104	46	8	0.29	14	0.0298
		transformer-2 protein homolog beta isoform X1	568994802	34	5	0.1	10	0.0298
		dynactin subunit 3 isoform A	227116273	21	3	0.14	7	0.0297
		ras-related protein Rab-39B	30424726	25	4	0.33	8	0.0296
		synaptophysin	166235165	34	2	0.064	11	0.0296
		creatine kinase U-type, mitochondrial isoform X1	568915233	47	6	0.31	14	0.0295
		AH receptor-interacting protein	443497959	38	6	0.23	13	0.0295
		60S ribosomal protein L22-like 1	13386010	14	2	0.26	4	0.0295
		alpha-2-macroglobulin receptor-associated protein precursor	63999380	42	5	0.21	12	0.0294
		heterogeneous nuclear ribonucleoprotein H2 isoform X1	569011433	49	5	0.32	15	0.0294
		trafficking protein particle complex subunit 5	157266281	21	3	0.14	7	0.0294
		Golgi reassembly-stacking protein 2	224967109	47	5	0.2	15	0.0293
		fragile X mental retardation syndrome-related protein 2	83921589	74	7	0.19	12	0.0293
		protein phosphatase 1 regulatory subunit 7	12963569	41	6	0.25	12	0.0293
		serine/threonine-protein phosphatase 4 catalytic subunit	9790175	35	5	0.28	12	0.0293
		phosphoribosyl pyrophosphate amidotransferase	26024309	57	7	0.18	17	0.029
		bifunctional ATP-dependent dihydroxyacetone kinase/FAD-AMP lyase (cyclizing)	21703976	60	7	0.2	19	0.029
		haloacid dehalogenase-like hydrolase domain-containing protein 2 isoform 1	21313310	29	3	0.16	10	0.0289
		DNA (cytosine-5)-methyltransferase 1 isoform 1	327180732	183	11	0.095	23	0.0288
		serine/threonine-protein phosphatase 6 regulatory subunit 3 isoform 2	22726197	95	6	0.1	12	0.0288
		F-actin-capping protein subunit alpha-1	161086971	33	5	0.43	11	0.0288
		trafficking protein particle complex subunit 4	11140825	24	5	0.29	8	0.0288
		ADP-ribosylation factor-like protein 2	31980988	21	3	0.17	6	0.0288
		MORF4 family-associated protein 1	13385746	14	2	0.26	4	0.0288
		dehydrogenase/reductase SDR family member 1	31980844	34	5	0.27	12	0.0287
		long-chain specific acyl-CoA dehydrogenase, mitochondrial precursor	31982520	48	6	0.21	14	0.0287
		histidine triad nucleotide-binding protein 3 isoform X1	568965584	23	3	0.2	7	0.0287
		mortality factor 4-like protein 2	269996025	32	5	0.23	11	0.0286
		enoyl-CoA delta isomerase 1, mitochondrial precursor	31981810	32	4	0.2	11	0.0286
		beta-lactamase-like protein 2	21703764	33	5	0.21	11	0.0286
		vacuolar protein sorting-associated protein 28 homolog	13385320	25	6	0.39	8	0.0285
		ras-related protein Rab-22A	148747177	22	4	0.34	7	0.0285
		DAZ-associated protein 1 isoform a	169790818	43	6	0.26	13	0.0283
		eukaryotic peptide chain release factor subunit 1	124286826	49	5	0.15	14	0.0282
		pyridoxal phosphate phosphatase	47059486	32	5	0.26	11	0.0282
		scaffold attachment factor B1	254028159	105	7	0.15	13	0.0281
		thioredoxin-related transmembrane protein 2 isoform a precursor	21313210	34	4	0.2	11	0.0279
		protein NipSnap homolog 2	160298168	33	6	0.24	10	0.0279
		UDP-N-acetylhexosamine pyrophosphorylase-like protein 1	84794548	57	5	0.12	16	0.0278
		dnaJ homolog subfamily A member 2	9789937	46	5	0.24	13	0.0278
		lamina-associated polypeptide 2 isoform delta	121949767	46	5	0.34	13	0.0278
		microtubule-associated protein RP/EB family member 2 isoform 1	253314540	37	4	0.24	12	0.0276
		heterogeneous nuclear ribonucleoprotein H3 isoform X2	568967963	35	5	0.18	12	0.0275
		protein PRRC1	110625811	46	5	0.22	14	0.0275
		pyrroline-5-carboxylate reductase 3	119508439	29	4	0.18	10	0.0275
		cAMP-dependent protein kinase type II-beta regulatory subunit	45598396	46	5	0.22	13	0.0275
		B-cell receptor-associated protein 31	31981310	28	3	0.17	9	0.0275
		nuclear autoantigenic sperm protein isoform 2	125490378	84	7	0.14	19	0.0274
		cullin-1 isoform X1	568942002	90	10	0.19	14	0.0274
		hsp70-binding protein 1	13195602	39	5	0.2	13	0.0273
		lysosomal protective protein isoform X1	755498933	56	6	0.12	17	0.0272
		serine/arginine-rich splicing factor 2 isoform X1	568972519	25	4	0.22	8	0.0271
		ras-related protein R-Ras2 precursor	165972315	23	3	0.19	7	0.0271
		ER membrane protein complex subunit 4	13386014	20	3	0.16	6	0.0271
		oxygen-dependent coproporphyrinogen-III oxidase, mitochondrial precursor	161484660	50	8	0.26	16	0.027
		beta-catenin-like protein 1	254540032	65	5	0.098	10	0.027
		metaxin-2	228480241	30	4	0.22	9	0.027
		COP9 signalosome complex subunit 7a isoform 2	255760052	30	5	0.32	10	0.027
		EKC/KEOPS complex subunit Tprkb	281427253	20	2	0.1	6	0.027
		dynamin-like 120 protein, mitochondrial isoform 2 precursor	19526960	111	10	0.15	17	0.0269
		sterol-4-alpha-carboxylate 3-dehydrogenase, decarboxylating	31982437	41	5	0.22	13	0.0269
		tetraspanin-13	13384722	22	2	0.15	7	0.0269
		flavin reductase (NADPH) isoform 1	21450325	22	3	0.17	7	0.0268
		ATP-dependent (S)-NAD(P)H-hydrate dehydratase isoform 1	298676450	39	7	0.31	13	0.0267
		ras-related protein Rab-8A	38372905	24	2	0.26	7	0.0267
		charged multivesicular body protein 4b	28077049	25	3	0.16	8	0.0267
		poly(U)-binding-splicing factor PUF60 isoform a	257196183	60	6	0.2	17	0.0266
		developmentally-regulated GTP-binding protein 2	10946678	41	4	0.14	11	0.0266
		calcium-regulated heat stable protein 1	13385290	16	2	0.18	5	0.0266
		serine/threonine-protein phosphatase 5	199559777	57	5	0.15	15	0.0265
		transmembrane protein 214	31559970	76	6	0.13	12	0.0265
		septin-11 isoform X6	568935974	50	5	0.14	13	0.0265
		voltage-dependent anion-selective channel protein 3 isoform 2	6755967	31	5	0.29	10	0.0265
		arpin	47498088	25	4	0.27	8	0.0265
		gamma-enolase isoform X1	568940589	47	7	0.3	13	0.0264
		lysophospholipase-like protein 1	227496223	26	3	0.18	8	0.0264
		condensin complex subunit 3	169234780	113	6	0.088	13	0.0263
		lanosterol 14-alpha demethylase	71061451	57	8	0.22	15	0.0263
		endophilin-A2 isoform 1	7305485	42	3	0.11	11	0.0263
		cytoskeleton-associated protein 5 isoform 2	260166719	224	16	0.13	26	0.0262
		C-Myc-binding protein	84871978	12	2	0.28	3	0.0262
		cytosolic non-specific dipeptidase	31981273	53	5	0.16	14	0.026
		estradiol 17-beta-dehydrogenase 8	157951743	27	4	0.2	9	0.026
		catenin beta-1	260166642	85	5	0.13	12	0.0259
		TBC1 domain family member 17	111120337	73	6	0.16	11	0.0259
		FAS-associated factor 2	158533976	52	5	0.22	13	0.0257
		PI-PLC X domain-containing protein 3	169234801	36	5	0.21	11	0.0257
		FAS-associated factor 1	40789280	74	5	0.13	11	0.0257
		tubulin beta-6 chain	27754056	50	5	0.51	13	0.0256
		N-acetyl-D-glucosamine kinase isoform 2	255958271	32	4	0.18	10	0.0256
		YTH domain-containing family protein 3 isoform 1	225543495	65	5	0.12	10	0.0255
		adenylosuccinate lyase	29788764	55	6	0.15	14	0.0255
		U4/U6 small nuclear ribonucleoprotein Prp3	31980657	77	7	0.11	12	0.0255
		transmembrane protein 33 isoform 1	22267448	28	4	0.15	8	0.0255
		splicing factor, arginine/serine-rich 11 isoform 1	147898671	53	3	0.097	8	0.0255
		proteasome-associated protein ECM29 homolog	37718970	204	11	0.088	23	0.0254
		twinfilin-1 isoform X1	568991766	37	4	0.16	11	0.0254
		vacuolar protein sorting-associated protein 29 isoform X1	568937407	21	4	0.32	6	0.0254
		lysosome membrane protein 2 precursor	6680878	54	5	0.15	8	0.0254
		bifunctional purine biosynthesis protein PURH	227908823	64	10	0.3	17	0.0253
		regulation of nuclear pre-mRNA domain-containing protein 1B isoform b	34328077	37	5	0.39	11	0.0253
		28S ribosomal protein S34, mitochondrial	13385670	26	5	0.29	7	0.0253
		GRIP1-associated protein 1 isoform X11	569008870	90	4	0.097	12	0.0252
		SUMO-activating enzyme subunit 1 isoform a	552953709	39	5	0.19	10	0.0252
		mitochondrial Rho GTPase 1 isoform 2	254039727	76	6	0.11	11	0.0252
		ER membrane protein complex subunit 2	13385196	35	4	0.19	10	0.0252
		intraflagellar transport protein 25 homolog	110625938	16	2	0.17	4	0.0252
		BRCA2 and CDKN1A-interacting protein	134031957	36	4	0.17	9	0.0251
		protein CREG1 isoform X1	568911032	24	2	0.13	7	0.0251
		ubiquitin-like modifier-activating enzyme 6	27370032	118	8	0.12	13	0.025
		cell differentiation protein RCD1 homolog	10946722	34	5	0.18	10	0.025
		dnaJ homolog subfamily C member 2 isoform X1	568933120	63	5	0.13	9	0.025
		GTPase NRas precursor	111154109	21	3	0.24	6	0.025
		6-pyruvoyl tetrahydrobiopterin synthase	7110709	16	2	0.19	4	0.025
		insulin-like growth factor II isoform 2 preproprotein	170172556	20	2	0.13	5	0.025
		acylamino-acid-releasing enzyme	214010153	82	5	0.11	12	0.0249
		ADP-ribosylation factor GTPase-activating protein 1 isoform X2	568920177	47	6	0.33	12	0.0249
		uridine diphosphate glucose pyrophosphatase	23956126	24	4	0.23	7	0.0249
		mitochondrial import receptor subunit TOM20 homolog	13324686	16	2	0.17	4	0.0249
		oxidoreductase HTATIP2 isoform a precursor	225690589	30	3	0.18	9	0.0248
		RWD domain-containing protein 1	21735427	28	4	0.25	8	0.0247
		apoptotic chromatin condensation inducer in the nucleus isoform 2	146231985	151	9	0.098	17	0.0246
		probable tRNA N6-adenosine threonylcarbamoyltransferase	84662768	36	7	0.31	11	0.0246
		protein NDRG1	118150658	43	5	0.22	11	0.0246
		AP-1 complex subunit sigma-2 isoform 3	594150375	19	2	0.17	5	0.0246
		26S proteasome non-ATPase regulatory subunit 5	134053913	56	5	0.15	14	0.0245
		hydroxyacylglutathione hydrolase, mitochondrial isoform 1 precursor	227499238	34	5	0.22	10	0.0245
		aflatoxin B1 aldehyde reductase member 2	240120054	41	5	0.21	12	0.0245
		cysteine and glycine-rich protein 1	6681069	21	2	0.13	6	0.0245
		monoacylglycerol lipase ABHD6	31560264	38	4	0.15	11	0.0245
		AP-3 complex subunit sigma-1 isoform 1	6753078	22	2	0.1	6	0.0245
		plasminogen receptor (KT)	21312800	17	2	0.16	4	0.0245
		transcription factor SOX-2	127140986	34	3	0.23	9	0.0244
		protein TFG isoform X1	568995016	43	6	0.23	11	0.0244
		tubulin alpha-4A chain isoform X1	568907654	48	3	0.61	12	0.0244
		protein canopy homolog 3 precursor	21312510	31	4	0.18	9	0.0244
		crk-like protein isoform 1	31542421	34	3	0.19	9	0.0244
		porphobilinogen deaminase isoform 1	159110431	39	4	0.17	10	0.0244
		CAAX prenyl protease 1 homolog	27370012	55	3	0.11	14	0.0243
		phenylalanine--tRNA ligase alpha subunit	162138894	58	6	0.2	14	0.0243
		replication factor C subunit 5	110625924	38	5	0.22	11	0.0243
		OCIA domain-containing protein 1 isoform 1	12963675	28	4	0.19	8	0.0243
		uncharacterized protein C7orf50 homolog	146134371	22	3	0.27	6	0.0243
		oligosaccharyltransferase complex subunit OSTC	13384930	17	2	0.13	4	0.0242
		interleukin enhancer-binding factor 3 isoform 1	111607430	98	5	0.063	12	0.0241
		trans-2-enoyl-CoA reductase, mitochondrial precursor	227116358	40	7	0.34	12	0.0241
		ataxin-10	83649709	54	8	0.21	13	0.0241
		tricarboxylate transport protein, mitochondrial	23943838	34	5	0.18	10	0.0241
		glycogen phosphorylase, brain form	24418919	97	7	0.11	10	0.0241
		UPF0587 protein C1orf123 homolog	21539639	22	2	0.15	6	0.0241
		cytochrome c oxidase subunit 6A1, mitochondrial	6680988	12	2	0.42	3	0.0241
		neurofilament medium polypeptide	112363107	96	5	0.093	10	0.0239
		general transcription factor IIF subunit 1	20270031	57	4	0.12	8	0.0239
		methylthioribose-1-phosphate isomerase	268838020	39	6	0.25	10	0.0239
		cation-dependent mannose-6-phosphate receptor precursor	14916479	31	3	0.19	8	0.0239
		COMM domain-containing protein 9	21313224	22	4	0.28	6	0.0239
		leucine-rich repeat-containing protein 57 isoform b	227430395	29	4	0.16	8	0.0239
		cytochrome c oxidase assembly factor 7	28076933	26	4	0.26	7	0.0239
		tubulin beta-4A chain	31981939	50	3	0.79	12	0.0238
		tRNA-dihydrouridine(47) synthase [NAD(P)(+)]-like	255003775	71	5	0.12	10	0.0238
		serine/arginine-rich splicing factor 10 isoform 2	122937372	31	3	0.14	8	0.0238
		importin subunit alpha-4	6680596	58	8	0.27	14	0.0237
		tubulin-specific chaperone D	28077067	133	10	0.11	14	0.0237
		secretory carrier-associated membrane protein 3	118601011	38	3	0.14	10	0.0237
		dnaJ homolog subfamily C member 8	157951606	30	3	0.14	8	0.0237
		thyroid hormone receptor interactor 11	226531227	226	12	0.1	23	0.0236
		protein archease	21746142	20	2	0.16	5	0.0236
		glutaredoxin-3	31981269	38	6	0.27	9	0.0235
		cholecystokinin isoform 1 preproprotein	13624301	13	2	0.22	3	0.0235
		nucleoprotein TPR	270309140	274	14	0.08	28	0.0234
		eukaryotic translation initiation factor 5B isoform X1	568906221	137	9	0.13	14	0.0234
		oxysterol-binding protein 1	133504509	89	5	0.097	12	0.0233
		nicotinamide phosphoribosyltransferase	257153454	55	6	0.22	13	0.0233
		nuclear pore complex protein Nup155	165932389	155	6	0.068	16	0.0233
		dihydrolipoyllysine-residue succinyltransferase component of 2-oxoglutarate dehydrogenase complex, mitochondrial	21313536	49	3	0.12	12	0.0233
		NADH dehydrogenase [ubiquinone] 1 alpha subcomplex subunit 5	13386100	13	2	0.29	3	0.0233
		transmembrane 9 superfamily member 3 precursor	19111162	68	5	0.13	14	0.0232
		mitogen-activated protein kinase 3	21489933	43	5	0.17	10	0.0232
		cullin-5 isoform 1	239051067	99	5	0.076	13	0.0231
		lysine-specific histone demethylase 1A isoform X1	568932208	95	5	0.089	10	0.0231
		cAMP-dependent protein kinase catalytic subunit alpha isoform 2	483968030	40	3	0.38	9	0.0231
		coatomer subunit zeta-2	9845242	23	2	0.14	6	0.0231
		arfaptin-2	228008331	38	5	0.26	9	0.0229
		spliceosome-associated protein CWC15 homolog	12963537	27	4	0.21	7	0.0229
		ATP-dependent RNA helicase DDX50	16716475	82	5	0.1	11	0.0228
		RNA-binding protein Raly short isoform	213417775	31	5	0.19	9	0.0228
		squamous cell carcinoma antigen recognized by T-cells 3 isoform X1	568937362	112	6	0.087	11	0.0228
		huntingtin-interacting protein 1-related protein	255308928	119	7	0.089	12	0.0228
		uncharacterized protein C19orf43 homolog	85362708	18	2	0.23	5	0.0228
		microtubule-associated protein 2 isoform X10	568905901	199	11	0.1	27	0.0227
		eukaryotic translation initiation factor 2A	54020676	64	8	0.23	15	0.0227
		coatomer subunit gamma-2	8567340	98	8	0.18	13	0.0227
		serine/threonine-protein phosphatase PP1-alpha catalytic subunit	13994195	38	5	0.6	10	0.0227
		N-terminal kinase-like protein	12963867	89	6	0.19	9	0.0227
		replication factor C subunit 4	21703948	40	4	0.14	11	0.0226
		protein phosphatase 1B isoform 2	33859600	43	5	0.24	10	0.0226
		steroid receptor RNA activator 1 isoform a	257096048	26	3	0.19	7	0.0226
		D-tyrosyl-tRNA(Tyr) deacylase 1	13384676	23	2	0.15	6	0.0226
		transformer-2 protein homolog alpha	111160869	33	4	0.1	8	0.0226
		alpha/beta hydrolase domain-containing protein 14B	171460960	22	3	0.2	6	0.0225
		transcription elongation factor A protein-like 3	158854024	22	4	0.28	6	0.0225
		nucleoplasmin-3	6679110	19	3	0.3	5	0.0225
		alpha-aminoadipic semialdehyde dehydrogenase isoform b	188035915	56	7	0.25	13	0.0224
		splicing factor U2AF 65 subunit isoform 2	164565377	53	5	0.29	12	0.0224
		PITH domain-containing protein 1	158854007	24	3	0.17	6	0.0224
		short/branched chain specific acyl-CoA dehydrogenase, mitochondrial	17647119	48	5	0.18	11	0.0224
		elongation factor G, mitochondrial	170650599	84	5	0.11	11	0.0222
		sphingosine kinase 2	289191399	66	3	0.079	9	0.0221
		histidine triad nucleotide-binding protein 2, mitochondrial precursor	110625719	17	2	0.2	4	0.0221
		phosphoglucomutase-1	33859686	69	7	0.15	9	0.022
		beta-soluble NSF attachment protein isoform X1	755498886	23	2	0.24	6	0.022
		enhancer of mRNA-decapping protein 4 isoform 2	31712002	151	10	0.15	15	0.0219
		pre-mRNA-processing factor 40 homolog A isoform X4	568914018	106	6	0.1	10	0.0219
		insulin-degrading enzyme	459352741	118	5	0.062	11	0.0219
		serine/threonine-protein phosphatase 4 regulatory subunit 3A isoform 2	237649040	95	6	0.12	9	0.0219
		MOB kinase activator 1A	21704148	25	2	0.11	6	0.0219
		glucagon precursor	33468853	21	3	0.24	5	0.0219
		D-beta-hydroxybutyrate dehydrogenase, mitochondrial precursor	170014720	38	4	0.15	10	0.0218
		interferon-stimulated gene 20 protein isoform b	15805028	21	2	0.099	5	0.0218
		DNA mismatch repair protein Msh2	6678938	104	5	0.089	10	0.0217
		valacyclovir hydrolase precursor	21624609	33	3	0.096	8	0.0217
		persulfide dioxygenase ETHE1, mitochondrial precursor	12963539	28	3	0.15	7	0.0217
		ras-related protein Rab-4A	171184402	24	4	0.35	6	0.0217
		derlin-2 isoform a	15808990	28	2	0.17	5	0.0217
		protein phosphatase 1 regulatory subunit 14B	62122946	16	2	0.35	4	0.0215
		heat shock 70 protein 1B	124339826	70	4	0.21	9	0.0213
		arfaptin-1 isoform 1	124487362	42	4	0.14	9	0.0213
		bleomycin hydrolase	30519997	53	5	0.19	11	0.0213
		glutamine synthetase	31982332	42	6	0.22	9	0.0213
		S-methyl-5'-thioadenosine phosphorylase	45544618	31	3	0.15	8	0.0213
		dual specificity protein phosphatase 3	21312314	20	2	0.17	5	0.0213
		UV excision repair protein RAD23 homolog B	171906578	44	4	0.21	10	0.0212
		alpha-N-acetylgalactosaminidase precursor	168693635	47	4	0.14	10	0.0212
		cleavage stimulation factor subunit 3 isoform 1	21704042	83	5	0.12	10	0.0212
		stromal membrane-associated protein 2 isoform X3	568929710	28	2	0.096	6	0.0212
		calcineurin subunit B type 1	84794597	19	3	0.39	4	0.0212
		TATA box-binding protein-like protein 1 isoform X1	568965391	21	2	0.19	5	0.0212
		glutathione reductase, mitochondrial precursor	160298213	54	6	0.22	12	0.0211
		splicing factor 3A subunit 3	22095003	59	6	0.15	12	0.0211
		prolactin regulatory element-binding protein isoform 1	158749640	45	5	0.17	10	0.0211
		epsin-1	356995862	60	3	0.12	8	0.0211
		delta isoform of regulatory subunit B56, protein phosphatase 2A	33942059	69	4	0.066	9	0.0209
		DBIRD complex subunit ZNF326	269784644	65	4	0.11	8	0.0209
		kinetochore protein Spc25 isoform 1	312283739	26	3	0.15	6	0.0209
		myelin expression factor 2 isoform 3	244790095	60	7	0.24	13	0.0208
		polypyrimidine tract-binding protein 3 isoform 1	255003709	59	5	0.21	13	0.0208
		uroporphyrinogen-III synthase isoform X2	568950119	29	4	0.28	7	0.0208
		X-ray repair cross-complementing protein 5	160333605	83	6	0.14	10	0.0207
		ADP-ribosylarginine hydrolase	6680658	40	4	0.21	10	0.0207
		glypican-4 precursor	238624186	63	5	0.11	12	0.0207
		histone-binding protein RBBP4	47059484	48	5	0.31	10	0.0207
		ATP-dependent RNA helicase DDX18 isoform X1	568909499	66	4	0.073	8	0.0207
		nitrilase homolog 1 isoform 2	336088630	32	6	0.31	8	0.0207
		tight junction protein ZO-1 isoform X1	568947647	210	9	0.064	19	0.0206
		inositol-3-phosphate synthase 1	12963757	61	5	0.1	13	0.0206
		inosine-5'-monophosphate dehydrogenase 1 isoform 3	34328209	55	7	0.2	12	0.0206
		serine/threonine-protein phosphatase PP1-beta catalytic subunit	161484668	37	2	0.45	9	0.0206
		protein pelota homolog	164698448	43	5	0.19	9	0.0206
		coronin-1C	31542413	53	5	0.19	11	0.0204
		5'-AMP-activated protein kinase subunit gamma-1	124107596	38	3	0.17	9	0.0204
		Golgin subfamily A member 2 isoform b	124378030	113	6	0.082	10	0.0203
		acetoacetyl-CoA synthetase	21313520	75	5	0.089	9	0.0203
		proteasome assembly chaperone 2	19527372	30	2	0.08	7	0.0202
		DNA polymerase delta catalytic subunit	254587977	124	6	0.09	11	0.0202
		nucleolysin TIAR	6678349	43	3	0.11	9	0.0202
		PRA1 family protein 2	20070422	19	2	0.16	4	0.0202
		histone deacetylase 1	6680193	55	6	0.24	11	0.0201
		cytochrome b-c1 complex subunit Rieske, mitochondrial	13385168	29	3	0.16	7	0.0201
		ER membrane protein complex subunit 3	28827824	30	4	0.22	7	0.0201
		SPRY domain-containing protein 7	27228993	22	3	0.18	5	0.0201
		UPF0577 protein KIAA1324 isoform X2	568922649	111	5	0.076	10	0.02
		ATP-dependent RNA helicase DDX19A	170932536	54	5	0.13	11	0.0199
		SEC16 homolog A	124378050	254	11	0.099	23	0.0198
		host cell factor 1	34328130	210	11	0.09	20	0.0198
		probable ATP-dependent RNA helicase DDX23	124430514	95	6	0.081	8	0.0198
		tRNA (uracil-5-)-methyltransferase homolog A isoform 1	124487421	68	4	0.12	8	0.0198
		deoxyhypusine hydroxylase	284005490	33	3	0.17	8	0.0198
		THO complex subunit 6 homolog	56605680	37	3	0.12	9	0.0198
		COMM domain-containing protein 2	110626003	23	2	0.08	5	0.0198
		Sjoegren syndrome/scleroderma autoantigen 1 homolog	31543773	21	2	0.32	5	0.0198
		peptidyl-prolyl cis-trans isomerase FKBP8 isoform b	161484656	44	3	0.15	9	0.0197
		B-cell receptor-associated protein 29	255760055	28	4	0.17	6	0.0197
		ER membrane protein complex subunit 7 precursor	19526956	26	2	0.15	6	0.0196
		transcription factor A, mitochondrial isoform X1	568967414	32	3	0.11	7	0.0196
		apolipoprotein O isoform X1	755565726	26	3	0.26	5	0.0196
		ADP-ribosylation factor-related protein 1 isoform 1	260763870	23	2	0.15	5	0.0196
		ELAV-like protein 4 isoform X1	568928478	44	5	0.081	10	0.0195
		calcium/calmodulin-dependent protein kinase type II subunit beta isoform 2	226693349	60	5	0.21	12	0.0195
		transmembrane protein 109 precursor	19527378	26	2	0.086	6	0.0195
		isopentenyl-diphosphate Delta-isomerase 1	281604088	32	4	0.25	7	0.0195
		protein TSSC4 isoform 1	169259772	34	4	0.25	7	0.0195
		golgi autoantigen, golgin subfamily b, macrogolgin 1	226958601	370	17	0.074	31	0.0194
		RNA-binding protein 25	161353449	100	5	0.081	8	0.0194
		methyltransferase-like protein 7A	33563290	28	4	0.21	6	0.0194
		conserved oligomeric Golgi complex subunit 1 isoform X3	568971908	70	5	0.14	6	0.0194
		ATP-binding cassette sub-family F member 2 isoform 1	23956078	72	3	0.057	8	0.0193
		pyruvate kinase PKM isoform M1	359807367	58	3	0.74	11	0.0192
		CB1 cannabinoid receptor-interacting protein 1	62000629	19	2	0.24	4	0.0192
		protein NipSnap homolog 3B	13385084	28	4	0.27	6	0.0192
		adipocyte plasma membrane-associated protein	21313668	46	4	0.2	9	0.0191
		DNA-directed RNA polymerase II subunit RPB3	29336059	31	3	0.15	7	0.0191
		cathepsin D precursor	6753556	45	6	0.18	9	0.019
		propionyl-CoA carboxylase alpha chain, mitochondrial precursor	254540162	80	7	0.13	9	0.0189
		heterogeneous nuclear ribonucleoprotein U-like protein 1 isoform 1	21450323	96	5	0.081	8	0.0189
		AP-1 complex subunit sigma-1A isoform X1	568937948	22	2	0.13	4	0.0189
		protein FAM98A	139948818	55	5	0.17	11	0.0188
		nicalin precursor	33469043	63	7	0.18	12	0.0188
		mimitin, mitochondrial	188035926	20	4	0.24	4	0.0188
		multifunctional protein ADE2	13385434	47	3	0.15	9	0.0187
		protein Noxp20	170650597	61	4	0.11	7	0.0187
		protein syndesmos	13385314	23	4	0.27	5	0.0187
		HCLS1-associated protein X-1 isoform 1	6754160	32	3	0.16	7	0.0187
		ubiquitin carboxyl-terminal hydrolase 15 isoform 1	21489969	112	5	0.073	9	0.0186
		ATP-dependent RNA helicase DDX39A	38372907	49	5	0.31	9	0.0186
		CLIP-associating protein 2 isoform g	557636653	143	7	0.08	12	0.0186
		Golgi integral membrane protein 4 isoform 2	30424814	77	5	0.095	6	0.0186
		pancreas/duodenum homeobox protein 1	6679269	31	2	0.14	6	0.0186
		hsp90 co-chaperone Cdc37	7949018	45	4	0.15	8	0.0186
		serine/arginine-rich splicing factor 4	165377173	56	2	0.059	6	0.0186
		probable RNA-binding protein EIF1AD	58037183	20	2	0.18	4	0.0186
		trafficking protein particle complex subunit 1	66730565	17	2	0.12	3	0.0186
		exportin-5	24429570	137	7	0.076	11	0.0185
		dolichyl-phosphate beta-glucosyltransferase	21728372	37	4	0.15	8	0.0185
		small acidic protein isoform X1	755522939	18	2	0.14	4	0.0185
		peroxisomal multifunctional enzyme type 2	31982273	79	5	0.059	14	0.0184
		protein LYRIC	31982233	64	3	0.079	7	0.0184
		ubiquitin fusion degradation protein 1 homolog	257153392	34	2	0.088	7	0.0184
		hydroxymethylglutaryl-CoA lyase, mitochondrial precursor	171543858	34	5	0.24	8	0.0184
		N6-DNA methyltransferase A isoform 1	39540506	23	2	0.15	5	0.0184
		glycogen synthase kinase-3 beta isoform X1	568995942	48	3	0.16	9	0.0183
		SH3 domain-containing kinase-binding protein 1 isoform 1	209180436	73	5	0.14	8	0.0183
		protein phosphatase methylesterase 1	30794138	42	3	0.14	8	0.0183
		BTB/POZ domain-containing protein KCTD12	123701966	36	5	0.22	8	0.0183
		endothelial differentiation-related factor 1	10946942	16	2	0.12	3	0.0183
		constitutive coactivator of PPAR-gamma-like protein 1	126090857	122	5	0.076	10	0.0182
		serine/threonine-protein phosphatase PGAM5, mitochondrial isoform 1	254587962	32	4	0.11	7	0.0182
		protein FAM50A	262073031	40	3	0.11	7	0.0182
		acylphosphatase-1	13384810	11	2	0.27	2	0.0182
		EH domain-containing protein 1	7106303	61	6	0.22	11	0.0181
		proline synthase co-transcribed bacterial homolog protein isoform X1	568953806	32	3	0.13	7	0.0181
		gamma-glutamylaminecyclotransferase	21703924	17	3	0.3	3	0.0181
		ribosome maturation protein SBDS	23956138	29	3	0.18	6	0.018
		retinal rod rhodopsin-sensitive cGMP 3',5'-cyclic phosphodiesterase subunit delta	6679245	17	3	0.21	3	0.018
		DNA mismatch repair protein Msh6	6754744	151	8	0.084	12	0.0179
		craniofacial development protein 1	6753412	33	3	0.17	6	0.0179
		kinectin isoform X18	568986910	144	6	0.084	11	0.0178
		BUB3-interacting and GLEBS motif-containing protein ZNF207 isoform 1	194328715	53	4	0.093	10	0.0178
		dnaJ homolog subfamily B member 9 precursor	31560495	26	2	0.11	5	0.0178
		bcl-2-associated transcription factor 1 isoform 2	24496776	106	3	0.045	8	0.0177
		MMS19 nucleotide excision repair protein homolog	15100156	113	4	0.069	9	0.0177
		sulfite oxidase, mitochondrial precursor	74024924	61	5	0.19	11	0.0177
		protein RUFY3 isoform X1	568935984	77	5	0.098	8	0.0177
		pre-rRNA-processing protein TSR1 homolog	126506294	92	3	0.052	7	0.0177
		rab3 GTPase-activating protein non-catalytic subunit	255003810	155	7	0.073	12	0.0176
		acetyl-coenzyme A transporter 1	31543730	61	6	0.16	11	0.0176
		iron-sulfur cluster assembly 2 homolog, mitochondrial precursor	254039596	17	2	0.18	3	0.0176
		probable ubiquitin carboxyl-terminal hydrolase FAF-X	115511018	290	13	0.071	22	0.0175
		pre-mRNA-splicing factor SPF27	70906453	26	4	0.36	5	0.0175
		integrator complex subunit 3	31652266	118	5	0.078	9	0.0175
		vacuolar protein sorting-associated protein 51 homolog	124486662	86	5	0.068	9	0.0175
		sorting nexin-6	27754031	47	4	0.15	8	0.0174
		fatty aldehyde dehydrogenase isoform X1	568971246	57	5	0.15	10	0.0174
		frataxin, mitochondrial precursor	6679863	23	3	0.19	4	0.0174
		arf-GAP domain and FG repeat-containing protein 1	33563260	58	6	0.2	11	0.0173
		proteasomal ubiquitin receptor ADRM1	31981027	42	4	0.14	8	0.0173
		dynactin subunit 5	188219518	20	3	0.18	4	0.0173
		RNA-binding protein with serine-rich domain 1 isoform 1	121674790	34	3	0.16	6	0.0173
		peroxisomal trans-2-enoyl-CoA reductase	227908837	32	4	0.18	7	0.0173
		sorting nexin-18	91598596	68	3	0.073	7	0.0173
		U2 small nuclear ribonucleoprotein B''	23956110	25	2	0.16	5	0.0173
		WW domain-binding protein 2	8394539	28	2	0.092	6	0.0172
		dynactin subunit 4	13385798	52	3	0.1	9	0.0172
		mitogen-activated protein kinase 1 isoform X1	568995370	41	4	0.23	7	0.0172
		nuclear RNA export factor 1 isoform 1	31980798	70	4	0.087	7	0.0172
		guanine nucleotide-binding protein G(q) subunit alpha	84662745	42	3	0.1	7	0.0172
		alanyl-tRNA editing protein Aarsd1	21450213	45	3	0.14	8	0.0171
		ERO1-like protein alpha precursor	7657067	54	4	0.15	9	0.0171
		annexin A7	160707956	50	3	0.063	9	0.0171
		dephospho-CoA kinase domain-containing protein	27754054	26	3	0.13	5	0.0171
		target of Myb protein 1 isoform 2	210147426	57	4	0.18	10	0.0171
		palmitoyl-protein thioesterase 1 precursor	121674797	34	3	0.15	7	0.0171
		cathepsin Z preproprotein	11968166	34	3	0.13	7	0.0171
		polyglutamine-binding protein 1 isoform 1	31980927	31	2	0.17	6	0.0171
		aldehyde dehydrogenase family 16 member A1	26080429	85	4	0.072	9	0.017
		nuclear receptor-binding protein	22219434	60	4	0.12	6	0.017
		E3 ubiquitin-protein ligase MARCH5 isoform 1	256773297	31	3	0.14	6	0.017
		ADP-ribosylation factor-like protein 6	188528681	21	2	0.16	4	0.017
		retinoid-inducible serine carboxypeptidase precursor	253970508	51	3	0.053	9	0.0169
		translation initiation factor eIF-2B subunit epsilon	26986557	80	4	0.086	8	0.0169
		phospholipid hydroperoxide glutathione peroxidase, nuclear isoform 1	90903233	29	3	0.1	5	0.0169
		tyrosine-protein phosphatase non-receptor type 23	124517678	185	7	0.076	14	0.0168
		heat shock-related 70 protein 2	31560686	70	3	0.23	7	0.0168
		sorting nexin-5	18034769	47	4	0.099	7	0.0168
		ganglioside-induced differentiation-associated protein 1-like 1	160420342	42	3	0.15	7	0.0168
		ataxin-2-like protein isoform X2	568950403	115	5	0.069	9	0.0167
		COP9 signalosome complex subunit 1 isoform 1	295424137	59	4	0.1	10	0.0167
		septin-5	158508501	43	5	0.18	7	0.0167
		guanine nucleotide-binding protein G(k) subunit alpha	33563256	41	4	0.17	7	0.0167
		1-acyl-sn-glycerol-3-phosphate acyltransferase alpha precursor	254281341	32	4	0.16	9	0.0166
		2-oxoglutarate and iron-dependent oxygenase domain-containing protein 3	13384786	35	3	0.17	7	0.0166
		dolichyl-diphosphooligosaccharide--protein glycosyltransferase subunit STT3B	61651673	93	5	0.079	9	0.0166
		ester hydrolase C11orf54 homolog	19526926	35	4	0.18	7	0.0166
		serine/threonine-protein phosphatase 6 regulatory subunit 1	34536815	95	4	0.086	7	0.0166
		BRISC complex subunit Abro1	347582639	48	4	0.13	8	0.0166
		5'-AMP-activated protein kinase subunit beta-1	23956234	30	2	0.11	6	0.0166
		zinc finger protein 330	21704208	36	4	0.23	7	0.0166
		mitotic spindle-associated MMXD complex subunit MIP18	21312046	18	2	0.26	3	0.0166
		U2 snRNP-associated SURP motif-containing protein isoform 1	171460910	118	6	0.083	9	0.0165
		ribose-phosphate pyrophosphokinase 2	13386146	35	4	0.48	7	0.0165
		serine/arginine-rich splicing factor 5	119226243	31	2	0.14	5	0.0164
		late secretory pathway protein AVL9 homolog	226529032	72	3	0.077	7	0.0164
		dihydropyrimidinase-related protein 1 isoform 1	209862923	74	5	0.19	12	0.0163
		metaxin-1 isoform 2	241982742	51	4	0.11	10	0.0163
		serum albumin precursor	163310765	69	2	0.044	9	0.0162
		deoxynucleoside triphosphate triphosphohydrolase SAMHD1 isoform 1	213418055	76	5	0.11	7	0.0162
		transmembrane protein 165 precursor	111154067	35	3	0.19	7	0.0162
		syntaxin-16 isoform a	156231057	37	3	0.19	6	0.0162
		BET1-like protein	170287745	12	2	0.34	2	0.0162
		calcineurin B homologous protein 1	9790225	22	2	0.16	4	0.0162
		class A basic helix-loop-helix protein 15 isoform X1	568938963	27	2	0.094	5	0.0162
		exosome complex component CSL4 isoform 1	22267446	21	2	0.14	4	0.0162
		ubiquitin-associated protein 2	28076915	118	4	0.056	9	0.0161
		cAMP-regulated phosphoprotein 19 isoform 1	10946986	12	2	0.33	2	0.0161
		prolyl-tRNA synthetase associated domain-containing protein 1 isoform 2	21312706	19	2	0.17	3	0.016
		cullin-4A	167466258	88	6	0.09	8	0.016
		exosome complex component RRP43 isoform 1	254675240	30	3	0.21	6	0.016
		opioid growth factor receptor	258679484	71	3	0.084	5	0.016
		protein NipSnap homolog 1 isoform X1	568969995	34	3	0.1	6	0.0159
		transgelin-3	9790125	22	3	0.36	4	0.0159
		protein GNAS isoform XLas	47271396	122	7	0.096	19	0.0158
		kinesin family member C5B	116642893	74	4	0.085	7	0.0158
		28S ribosomal protein S26, mitochondrial precursor	46402169	23	2	0.15	4	0.0158
		high mobility group protein B3 isoform X1	569009749	23	3	0.23	4	0.0158
		active breakpoint cluster region-related protein isoform 1	37574113	99	5	0.078	9	0.0157
		syntaxin-18 isoform X1	568934549	32	2	0.11	5	0.0157
		lanC-like protein 2	19526936	51	4	0.14	8	0.0157
		derlin-1	13195638	29	3	0.11	5	0.0157
		kinetochore protein Spc24	21312862	23	3	0.28	4	0.0157
		S-adenosylmethionine synthase isoform type-2	21704144	44	3	0.1	7	0.0156
		transmembrane protein 163	58037291	31	3	0.15	6	0.0156
		isoaspartyl peptidase/L-asparaginase	31560239	34	3	0.14	6	0.0156
		epithelial splicing regulatory protein 1 isoform 1	165972311	76	3	0.084	7	0.0156
		Down syndrome critical region protein 3 homolog	6681145	33	3	0.1	6	0.0156
		ubiquitin-conjugating enzyme E2 H isoform 2	281332142	17	2	0.16	3	0.0156
		neuroblastoma-amplified protein	255003837	266	11	0.07	18	0.0155
		WD40 repeat-containing protein SMU1	227430367	58	5	0.17	9	0.0155
		methylosome subunit pICln	19263324	27	2	0.17	5	0.0155
		transportin-3	54312056	104	3	0.064	7	0.0154
		nucleobindin-1 isoform 1 precursor	254750698	53	4	0.12	8	0.0154
		lys-63-specific deubiquitinase BRCC36	22165366	33	3	0.14	6	0.0154
		transmembrane protein 43	21311891	45	3	0.16	7	0.0154
		dual specificity mitogen-activated protein kinase kinase 2	31560267	44	4	0.12	7	0.0154
		tubulin-specific chaperone C	87044901	38	3	0.091	7	0.0154
		epimerase family protein SDR39U1	131889222	31	4	0.24	6	0.0153
		39S ribosomal protein L40, mitochondrial precursor	255003746	24	2	0.12	4	0.0153
		RNA polymerase-associated protein LEO1	87299619	76	3	0.082	5	0.0152
		SPRY domain-containing protein 4	58037095	23	3	0.21	4	0.0152
		serine/threonine-protein kinase PAK 2 precursor	46559406	58	6	0.24	9	0.0151
		cytosolic purine 5'-nucleotidase isoform 1	256665234	68	4	0.13	10	0.015
		hepatoma-derived growth factor-related protein 2 isoform X1	568999119	75	2	0.04	5	0.015
		DNA-directed RNA polymerases I, II, and III subunit RPABC1	124249077	25	2	0.15	4	0.015
		echinoderm microtubule-associated protein-like 2 isoform 2	244790299	71	5	0.094	11	0.0149
		6-phosphofructo-2-kinase/fructose-2,6-bisphosphatase 2 isoform 2	241666427	55	4	0.11	8	0.0149
		BRO1 domain-containing protein BROX isoform X2	568911574	40	3	0.19	6	0.0149
		transducin beta-like protein 2 isoform X1	568938121	47	4	0.11	7	0.0149
		histone acetyltransferase KAT7 isoform 1	303521965	71	5	0.13	6	0.0149
		SRSF protein kinase 2	47059480	77	3	0.05	5	0.0149
		zinc finger protein-like 1 isoform X2	569006038	28	3	0.13	5	0.0149
		receptor expression-enhancing protein 2 isoform 2	326319955	28	2	0.19	5	0.0149
		serine/arginine repetitive matrix protein 2	126157504	284	11	0.074	19	0.0148
		2-amino-3-ketobutyrate coenzyme A ligase, mitochondrial isoform a	240120117	45	3	0.12	7	0.0148
		cyclin-dependent kinase 4	6753380	34	3	0.15	6	0.0148
		ras-related protein Rab-24 isoform X1	568983176	30	3	0.16	5	0.0148
		UBX domain-containing protein 1	22122591	34	3	0.18	5	0.0148
		prefoldin subunit 1	13385532	14	2	0.19	2	0.0148
		methionine aminopeptidase 2 isoform X1	568968079	53	3	0.13	8	0.0147
		prolyl endopeptidase-like isoform a	254939518	83	4	0.13	7	0.0147
		ubiquitin carboxyl-terminal hydrolase 7	154146209	128	3	0.038	8	0.0147
		nucleoporin SEH1 isoform b	20532338	39	4	0.17	7	0.0147
		paraspeckle component 1	225543409	59	3	0.098	8	0.0147
		basic leucine zipper and W2 domain-containing protein 2	31981160	48	4	0.2	7	0.0147
		proteasome assembly chaperone 4 isoform b	160333430	14	2	0.33	2	0.0147
		DNA topoisomerase 2-alpha	153945749	173	6	0.059	11	0.0146
		TBC1 domain family member 8B	125630636	128	5	0.075	8	0.0146
		N-alpha-acetyltransferase 25, NatB auxiliary subunit	55742803	112	3	0.056	7	0.0146
		UV excision repair protein RAD23 homolog A isoform 2	34447211	40	3	0.23	6	0.0146
		FAS-associated death domain protein	6753812	23	2	0.18	4	0.0146
		splicing factor 3B subunit 4	23346437	44	3	0.13	7	0.0145
		guanine nucleotide-binding protein-like 3 isoform X1	568987886	47	2	0.1	4	0.0145
		CD2-associated protein	125987599	70	3	0.052	6	0.0143
		glycerophosphodiester phosphodiesterase domain-containing protein 1	23956140	36	3	0.13	6	0.0143
		nicastrin precursor	224809376	78	3	0.044	5	0.0143
		negative elongation factor A	33859652	58	3	0.092	5	0.0143
		sentrin-specific protease 8 isoform a	285026468	25	2	0.14	4	0.0143
		signal transducer and activator of transcription 1 isoform 2	114326482	87	5	0.087	7	0.0142
		succinyl-CoA ligase [GDP-forming] subunit beta, mitochondrial precursor	165972309	47	5	0.2	7	0.0142
		set1/Ash2 histone methyltransferase complex subunit ASH2 isoform b	124248550	60	2	0.062	5	0.0142
		nucleolar transcription factor 1 isoform 3	730229388	88	3	0.048	7	0.0141
		neuroendocrine convertase 1 isoform X1	568983152	84	3	0.045	7	0.0141
		beta-centractin	22122615	42	2	0.34	6	0.0141
		cathepsin L1 isoform X1	568983003	38	3	0.096	6	0.014
		protein FAM134A	124248548	58	3	0.085	5	0.014
		putative GTP cyclohydrolase 1 type 2 Nif3l1	41056093	42	3	0.11	7	0.0139
		calcium-dependent secretion activator 1 isoform X3	568985444	156	6	0.062	10	0.0139
		osteoclast-stimulating factor 1	22267440	24	2	0.093	4	0.0139
		protein phosphatase 1 regulatory subunit 12A isoform X1	568966888	115	5	0.065	7	0.0138
		OTU domain-containing protein 6B	157364966	37	3	0.19	6	0.0138
		microfibrillar-associated protein 1B	126517472	52	2	0.077	4	0.0138
		conserved oligomeric Golgi complex subunit 7	110625631	86	4	0.058	7	0.0138
		endoplasmic reticulum mannosyl-oligosaccharide 1,2-alpha-mannosidase	71534295	75	3	0.078	6	0.0138
		casein kinase I isoform alpha	22165382	38	4	0.14	6	0.0138
		cadherin-1 precursor	6753374	98	4	0.086	6	0.0138
		ATP-dependent Clp protease proteolytic subunit, mitochondrial precursor	8393156	30	2	0.11	5	0.0138
		superkiller viralicidic activity 2-like 2	21312352	118	4	0.062	7	0.0137
		protein TSSC1	238550175	43	3	0.1	6	0.0137
		NADH dehydrogenase subunit 2 (mitochondrion)	34538599	39	2	0.12	6	0.0137
		vesicle transport protein SEC20	255003752	26	3	0.12	4	0.0137
		3-beta-hydroxysteroid-Delta(8),Delta(7)-isomerase	6681255	26	2	0.096	4	0.0137
		transmembrane protein 41B	85662379	32	2	0.062	5	0.0136
		protein phosphatase 1 regulatory subunit 21	254911014	88	5	0.12	7	0.0136
		phosphatidylinositide phosphatase SAC1	13507622	67	5	0.092	9	0.0135
		peptidyl-prolyl cis-trans isomerase FKBP5	6753884	51	4	0.12	7	0.0135
		homocysteine-responsive endoplasmic reticulum-resident ubiquitin-like domain member 1 protein	11612515	44	3	0.13	6	0.0135
		striatin-3 isoform 1	16418469	87	4	0.063	7	0.0134
		2,4-dienoyl-CoA reductase, mitochondrial precursor	13385680	36	3	0.16	6	0.0134
		ufm1-specific protease 2	20149754	53	3	0.1	7	0.0134
		ubiquinol-cytochrome-c reductase complex assembly factor 1	213512915	34	3	0.11	5	0.0134
		transmembrane 9 superfamily member 2 precursor	188528894	75	5	0.094	10	0.0133
		ubiquitin carboxyl-terminal hydrolase 47 isoform 1	312836847	157	6	0.058	9	0.0133
		stromal interaction molecule 1 precursor	31981983	78	3	0.061	6	0.0133
		WD repeat-containing protein 11	227908800	136	3	0.047	8	0.0133
		pentatricopeptide repeat domain-containing protein 3, mitochondrial precursor	33469980	78	4	0.1	6	0.0133
		la-related protein 7	110665742	65	3	0.068	5	0.0133
		diablo homolog, mitochondrial precursor	85677504	27	3	0.21	4	0.0133
		DNA polymerase delta subunit 3	29789321	51	3	0.095	4	0.0132
		brefeldin A-inhibited guanine nucleotide-exchange protein 3	85701756	240	8	0.06	14	0.0131
		cAMP-dependent protein kinase type II-alpha regulatory subunit	22550094	46	3	0.16	6	0.0131
		NADH dehydrogenase subunit 4 (mitochondrion)	34538607	52	3	0.1	8	0.0131
		secretory carrier-associated membrane protein 1 isoform X1	568984187	32	2	0.14	5	0.0131
		protein FAM98B isoform X1	568918231	42	3	0.15	6	0.0131
		RNA-binding protein Musashi homolog 2 isoform 1	17157989	37	2	0.09	6	0.013
		28S ribosomal protein S7, mitochondrial precursor	30794474	28	2	0.15	4	0.013
		pre-mRNA-processing factor 6	21539655	107	5	0.066	6	0.0129
		protein YIPF3	247269773	38	2	0.095	6	0.0129
		double-strand-break repair protein rad21 homolog	254692855	72	2	0.038	4	0.0128
		RUN and FYVE domain-containing protein 1	27369788	80	3	0.052	6	0.0128
		conserved oligomeric Golgi complex subunit 5	253314464	91	3	0.063	7	0.0128
		syntaxin-binding protein 2	6755688	66	4	0.12	5	0.0128
		dynactin subunit 6 isoform 3	657406256	20	2	0.15	3	0.0128
		protein YIPF4	28076889	27	2	0.098	4	0.0128
		translation initiation factor eIF-2B subunit alpha	21703744	34	5	0.17	5	0.0127
		lamin-B2	113195686	67	3	0.12	5	0.0127
		myc box-dependent-interacting protein 1 isoform X2	569003955	66	2	0.054	5	0.0127
		gamma-interferon-inducible lysosomal thiol reductase precursor	125628657	28	2	0.11	4	0.0127
		UPF0554 protein C2orf43 homolog isoform 2	268370114	27	2	0.17	4	0.0127
		probable hydrolase PNKD isoform 2	87239988	16	2	0.2	2	0.0127
		dystonin isoform 1	454525117	871	29	0.059	48	0.0126
		bifunctional coenzyme A synthase precursor	27229125	62	3	0.14	8	0.0125
		serine/threonine-protein kinase MARK2 isoform X10	569006350	81	4	0.061	7	0.0125
		conserved oligomeric Golgi complex subunit 2	256985208	82	4	0.075	6	0.0125
		xaa-Pro dipeptidase	170650724	55	4	0.11	7	0.0125
		cytoplasmic dynein 1 light intermediate chain 2	225543181	54	3	0.081	7	0.0125
		zinc finger CCCH domain-containing protein 14 isoform a	231570586	82	3	0.097	6	0.0124
		T-cell immunomodulatory protein precursor	268839462	67	3	0.097	5	0.0124
		NEDD8 ultimate buster 1	119360354	70	3	0.1	5	0.0124
		selenoprotein M precursor	23956246	16	2	0.19	2	0.0124
		selenocysteine-specific elongation factor	12746442	64	2	0.098	6	0.0123
		uroporphyrinogen decarboxylase	110347606	41	4	0.17	6	0.0122
		nucleoporin 205	226437676	227	7	0.068	12	0.0121
		erlin-2 isoform X2	568954084	40	2	0.1	5	0.0121
		synapse-associated protein 1	270265917	41	3	0.14	5	0.0121
		ubiquinone biosynthesis protein COQ9, mitochondrial precursor	33859690	35	2	0.096	5	0.012
		protein YIF1B isoform 1	158937258	34	2	0.12	5	0.012
		DNA-directed RNA polymerases I, II, and III subunit RPABC3	21704118	17	2	0.25	2	0.012
		LIM domain only protein 7 isoform X11	568988043	154	4	0.067	8	0.0119
		WD repeat domain phosphoinositide-interacting protein 1	22122367	49	3	0.13	6	0.0119
		N-acetyltransferase 10	23346561	115	4	0.057	6	0.0119
		epithelial cell adhesion molecule precursor	112293275	35	2	0.14	5	0.0119
		vacuolar protein sorting-associated protein 4B	164698506	49	3	0.12	6	0.0119
		FUN14 domain-containing protein 2	262050556	17	2	0.15	2	0.0119
		reticulon-4 isoform A	34610235	127	5	0.05	15	0.0118
		probable ATP-dependent RNA helicase DDX46	530585119	117	4	0.047	6	0.0118
		COMM domain-containing protein 7 isoform 1	306035198	23	2	0.1	3	0.0118
		large neutral amino acids transporter small subunit 1	31982764	56	3	0.061	8	0.0117
		acyl-coenzyme A thioesterase 8	254587964	36	3	0.17	5	0.0117
		integrin alpha-V precursor	154240716	115	5	0.076	6	0.0117
		2-aminoethanethiol dioxygenase	225703118	28	2	0.1	4	0.0117
		pumilio domain-containing protein KIAA0020	29126213	73	3	0.073	5	0.0117
		prostaglandin E synthase 2	260763900	43	3	0.14	6	0.0117
		microtubule-associated protein tau isoform a	84370347	45	3	0.11	5	0.0117
		nascent polypeptide-associated complex subunit alpha isoform a	163965357	220	8	0.033	30	0.0116
		methionine adenosyltransferase 2 subunit beta isoform 2	313482787	36	3	0.16	5	0.0116
		conserved oligomeric Golgi complex subunit 6	160333744	73	5	0.12	5	0.0116
		neuromodulin	6679935	24	2	0.14	3	0.0116
		myotubularin-related protein 7	103472017	76	3	0.058	5	0.0115
		28S ribosomal protein S9, mitochondrial precursor	169790909	45	3	0.1	6	0.0115
		nuclear export mediator factor Nemf	32130521	121	4	0.062	6	0.0114
		mRNA cap guanine-N7 methyltransferase isoform 1	13385938	53	4	0.12	6	0.0114
		lymphokine-activated killer T-cell-originated protein kinase	12963575	37	2	0.067	5	0.0113
		sorting and assembly machinery component 50 homolog	30519943	52	2	0.064	6	0.0113
		nuclear ubiquitous casein and cyclin-dependent kinase substrate 1 isoform 1	224809559	26	2	0.14	3	0.0113
		leucine carboxyl methyltransferase 1	42794773	38	3	0.13	5	0.0113
		pre-mRNA-splicing factor 38A	227497256	37	2	0.09	4	0.0113
		mitochondrial import inner membrane translocase subunit Tim23	254675168	22	2	0.13	3	0.0113
		acetyl-CoA carboxylase 1	125656173	265	8	0.057	13	0.0112
		endophilin-B2 isoform X5	755497434	42	3	0.1	4	0.0112
		3-hydroxyisobutyrate dehydrogenase, mitochondrial precursor	21704140	35	2	0.09	5	0.0112
		ubiquitin domain-containing protein UBFD1 isoform X1	755522758	34	2	0.092	4	0.0112
		condensin complex subunit 2	295389521	82	2	0.037	4	0.0111
		translocation protein SEC62	39930429	46	3	0.073	5	0.0111
		vacuolar protein sorting-associated protein 45	7305631	65	2	0.044	5	0.0111
		5'-AMP-activated protein kinase catalytic subunit alpha-1	94681061	64	4	0.13	7	0.011
		dnaJ homolog subfamily A member 3, mitochondrial isoform 1	205361112	52	3	0.098	6	0.011
		cytochrome c-type heme lyase	225543251	31	2	0.11	4	0.011
		transcriptional repressor CTCF	31044459	84	3	0.079	4	0.011
		dnaJ homolog subfamily B member 1 isoform X1	568957878	27	2	0.11	3	0.011
		adaptin ear-binding coat-associated protein 1	27229051	30	3	0.15	4	0.0109
		GTP-binding protein 1 isoform X1	568991379	61	2	0.086	4	0.0109
		wiskott-Aldrich syndrome protein family member 1	13994209	62	2	0.07	4	0.0109
		serine/threonine-protein phosphatase 2A activator	254587947	37	2	0.13	4	0.0109
		acetyl-CoA acetyltransferase, cytosolic	148747461	41	3	0.15	5	0.0108
		type 1 phosphatidylinositol 4,5-bisphosphate 4-phosphatase isoform X2	568987318	29	2	0.12	4	0.0108
		U4/U6.U5 tri-snRNP-associated protein 2	20070404	65	3	0.099	4	0.0108
		mannose-6-phosphate isomerase isoform X1	568960659	27	2	0.086	3	0.0108
		ras suppressor protein 1	31982028	31	3	0.18	4	0.0108
		calcium uniporter protein, mitochondrial precursor	168823441	40	3	0.12	5	0.0107
		dnaJ homolog subfamily C member 7	31980994	56	2	0.063	6	0.0107
		tudor and KH domain-containing protein	110625942	62	4	0.087	7	0.0107
		HIV Tat-specific factor 1 homolog	23956212	86	2	0.048	4	0.0107
		SWI/SNF-related matrix-associated actin-dependent regulator of chromatin subfamily E member 1	10181166	47	2	0.068	5	0.0107
		synaptosomal-associated protein 23 isoform a	295317325	25	2	0.15	3	0.0107
		transcription elongation factor SPT6	166091434	199	6	0.058	9	0.0106
		cell division cycle and apoptosis regulator protein 1	33563288	132	3	0.061	6	0.0106
		glycylpeptide N-tetradecanoyltransferase 2 isoform d	594150361	57	3	0.14	6	0.0106
		general transcription factor II-I isoform 4	124001570	108	4	0.068	5	0.0106
		fatty-acid amide hydrolase 1	226443015	63	3	0.085	7	0.0106
		kinesin heavy chain isoform 5C	45433560	109	3	0.1	5	0.0106
		nuclear receptor coactivator 5	21450271	65	3	0.1	7	0.0106
		actin-related protein 10	226246593	46	3	0.16	5	0.0106
		exocyst complex component 8	37674218	81	2	0.064	5	0.0106
		rho guanine nucleotide exchange factor 2 isoform 2	312032458	110	3	0.065	5	0.0105
		nuclear pore complex protein Nup133	283806543	129	2	0.032	6	0.0105
		vacuolar protein sorting-associated protein 52 homolog	148747162	82	3	0.066	5	0.0105
		signal transducer and activator of transcription 3 isoform 3	22094115	83	2	0.054	5	0.0105
		exportin-T	124486686	110	3	0.04	5	0.0105
		AP2 associated kinase 1 isoform X1	568942008	104	3	0.048	5	0.0105
		polymerase delta-interacting protein 3	30519969	46	3	0.1	5	0.0105
		interferon regulatory factor 2-binding protein 1	31982348	62	2	0.068	4	0.0104
		ras GTPase-activating-like protein IQGAP2	118344444	181	4	0.049	8	0.0103
		pleiotropic regulator 1	31980791	57	4	0.12	6	0.0103
		cilia- and flagella-associated protein 36	30352008	40	2	0.082	4	0.0103
		PCTP-like protein isoform X1	755522934	40	4	0.18	5	0.0103
		cullin-2	170014698	87	3	0.071	5	0.0102
		magnesium transporter protein 1	298676496	42	3	0.092	5	0.0102
		39S ribosomal protein L15, mitochondrial isoform 1 precursor	295054166	34	3	0.13	4	0.0102
		sorting nexin-9	29568084	67	2	0.072	4	0.0102
		vitamin K epoxide reductase complex subunit 1-like protein 1 isoform 1	46309457	20	2	0.12	2	0.0102
		max-like protein X isoform gamma	226874810	33	2	0.097	4	0.0101
		CCA tRNA nucleotidyltransferase 1, mitochondrial isoform a	334358907	50	4	0.13	5	0.0101
		ATP-dependent RNA helicase DHX36	240848573	114	3	0.036	5	0.0101
		CUGBP Elav-like family member 2 isoform X7	568912124	56	3	0.076	6	0.0101
		poly(ADP-ribose) glycohydrolase ARH3	28916671	39	2	0.068	5	0.0101
		exosome complex component RRP46	20070392	25	2	0.17	3	0.0101
		twinfilin-2	6755224	39	2	0.1	4	0.0101
		dolichyl-diphosphooligosaccharide--protein glycosyltransferase subunit STT3A	148747128	81	4	0.085	8	0.01
		serine/threonine-protein kinase OSR1	365777424	58	4	0.11	6	0.01
		carbonyl reductase family member 4	269784762	25	3	0.17	3	0.01
		protein kinase C and casein kinase substrate in neurons protein 1	46559412	51	3	0.19	5	0.00999
		2',5'-phosphodiesterase 12	40538842	68	2	0.079	4	0.00999
		microtubule-associated protein 1S	162287131	103	4	0.04	6	0.00996
		parafibromin	22122445	61	3	0.085	6	0.00995
		polypyrimidine tract-binding protein 2 isoform X3	568923320	57	2	0.12	6	0.00995
		eukaryotic translation initiation factor 2B, subunit 3 gamma isoform 2	110626005	50	3	0.17	5	0.0099
		inositol monophosphatase 3	29244210	39	2	0.087	4	0.0099
		sperm-associated antigen 7 isoform 1	264681516	26	2	0.1	3	0.0099
		brefeldin A-inhibited guanine nucleotide-exchange protein 1	156231075	209	6	0.048	9	0.00989
		synaptotagmin-2	31543797	47	2	0.081	4	0.00986
		protein jagunal homolog 1 isoform 1	13385862	21	2	0.13	2	0.00985
		protein odr-4 homolog isoform 1	116805315	50	2	0.072	5	0.00985
		E3 ubiquitin-protein ligase UBR4	237820660	572	14	0.047	25	0.00979
		superkiller viralicidic activity 2-like	87252727	138	4	0.049	6	0.00979
		importin subunit alpha-7 isoform X1	568928522	61	3	0.12	6	0.00977
		IST1 homolog	21312626	39	2	0.091	4	0.00973
		bifunctional 3'-phosphoadenosine 5'-phosphosulfate synthase 1 isoform a	6754982	71	2	0.088	4	0.00973
		cytoplasmic FMR1-interacting protein 2	356995873	146	4	0.038	6	0.00972
		coiled-coil domain-containing protein 22	133922578	71	2	0.054	4	0.00969
		carboxymethylenebutenolidase homolog	31712014	28	3	0.11	3	0.00966
		phosphopantothenate--cysteine ligase	76096364	34	2	0.064	4	0.00963
		N-acetylgalactosamine-6-sulfatase isoform 1 precursor	171184398	58	3	0.04	6	0.00963
		serine/threonine-protein phosphatase CPPED1	31981882	35	2	0.09	4	0.0096
		NEDD8-activating enzyme E1 catalytic subunit isoform 1	162135936	52	3	0.13	5	0.00953
		branched-chain-amino-acid aminotransferase, mitochondrial isoform 1 precursor	33859514	44	3	0.18	5	0.00953
		coiled-coil domain-containing protein 12	227496903	19	2	0.23	2	0.0095
		tRNA-splicing endonuclease subunit Sen34 isoform a	13195596	34	2	0.082	4	0.00948
		la-related protein 1	226442901	121	2	0.026	5	0.00946
		prominin-1 isoform s1 precursor	254675296	96	2	0.03	4	0.00946
		lipopolysaccharide-responsive and beige-like anchor protein isoform beta	117956397	309	7	0.047	13	0.00945
		galectin-3-binding protein precursor	6755144	64	4	0.099	4	0.00945
		secretogranin-3 isoform 2 precursor	258645100	53	2	0.086	5	0.00945
		zinc finger RNA-binding protein	168480106	117	4	0.075	5	0.00945
		PERQ amino acid-rich with GYF domain-containing protein 2 isoform a	159032014	149	3	0.05	6	0.00943
		serine/threonine-protein phosphatase 2A 56 regulatory subunit epsilon isoform	33859660	55	3	0.086	5	0.00943
		39S ribosomal protein L16, mitochondrial precursor	19424352	29	2	0.1	3	0.00943
		DNA polymerase delta subunit 2	226423863	51	3	0.12	5	0.00939
		carbohydrate-responsive element-binding protein	34328263	95	2	0.059	4	0.00939
		EF-hand domain-containing protein D2	31981086	27	2	0.12	3	0.00936
		dehydrogenase/reductase SDR family member 7B isoform 2	21703854	35	4	0.2	4	0.00927
		zinc transporter SLC39A7 precursor	118150668	51	2	0.071	5	0.00925
		myosin-10	33598964	229	7	0.11	9	0.00924
		THO complex subunit 1	23956332	75	2	0.05	4	0.00924
		cationic amino acid transporter 2 isoform 1	113680130	72	2	0.033	4	0.00924
		beta-1,3-galactosyltransferase 6	17978260	37	2	0.12	4	0.00922
		phosphatidylinositol 5-phosphate 4-kinase type-2 gamma isoform X2	568966456	54	2	0.065	5	0.0092
		nucleoporin Nup37	210032861	37	2	0.1	4	0.00919
		AP-3 complex subunit beta-1	163310776	123	2	0.043	5	0.00918
		structural maintenance of chromosomes flexible hinge domain-containing protein 1	148839318	226	5	0.044	9	0.0091
		annexin A6 isoform b	158966670	75	2	0.67	4	0.0091
		protein kinase C beta type	6679345	77	2	0.083	4	0.00902
		tumor susceptibility gene 101 protein	11230780	44	2	0.072	4	0.00901
		protein FAM114A2 isoform 2	21312816	53	3	0.1	5	0.00899
		WD repeat-containing protein 5	18252790	37	2	0.078	4	0.00897
		gamma-tubulin complex component 2 isoform a	228008297	103	2	0.03	4	0.00897
		COBW domain-containing protein 1	22122605	44	2	0.1	4	0.00897
		nuclear pore complex protein Nup98-Nup96 isoform 1 precursor	562151654	197	4	0.037	8	0.00894
		fermitin family homolog 2	67906179	78	2	0.049	4	0.00893
		THO complex subunit 2	125656163	183	4	0.028	7	0.00891
		39S ribosomal protein L39, mitochondrial	364023817	39	2	0.08	4	0.00891
		torsin-1B precursor	31559990	38	2	0.083	4	0.00891
		cystathionine gamma-lyase	22122387	44	2	0.075	4	0.00885
		syntaxin-6	10946800	29	2	0.15	3	0.00881
		NFU1 iron-sulfur cluster scaffold homolog, mitochondrial isoform 2 precursor	282154801	29	2	0.11	3	0.00881
		calcium-binding protein 39	161086893	40	2	0.05	4	0.00878
		nuclear fragile X mental retardation-interacting protein 2 isoform X1	568975496	76	2	0.049	4	0.00878
		kinesin light chain 1 isoform X7	568978860	63	4	0.12	4	0.00869
		ubiquitin conjugation factor E4 B	172073169	133	2	0.029	5	0.00865
		DCC-interacting protein 13-alpha	21699066	79	3	0.054	4	0.00859
		electron transfer flavoprotein-ubiquinone oxidoreductase, mitochondrial precursor	254588014	68	3	0.068	6	0.00858
		A-kinase anchor protein SPHKAP	170014712	182	5	0.049	7	0.00857
		renin receptor precursor	21361250	39	2	0.11	4	0.00856
		ran-binding protein 9	161353515	76	3	0.055	4	0.00855
		la-related protein 4 isoform 2	124358932	80	3	0.074	3	0.00848
		histone acetyltransferase type B catalytic subunit	28076885	49	2	0.094	4	0.00847
		U4/U6 small nuclear ribonucleoprotein Prp4	55925589	58	4	0.14	5	0.00845
[truncated: 246 more rows]
