# Supplementary material for: Quantitative H2S-mediated protein sulfhydration reveals metabolic reprogramming during the integrated stress response
Source: eLife journal article supplement (doi:10.7554/elife.10067), 2015-11-23

Low concentration  
of NM-biotin

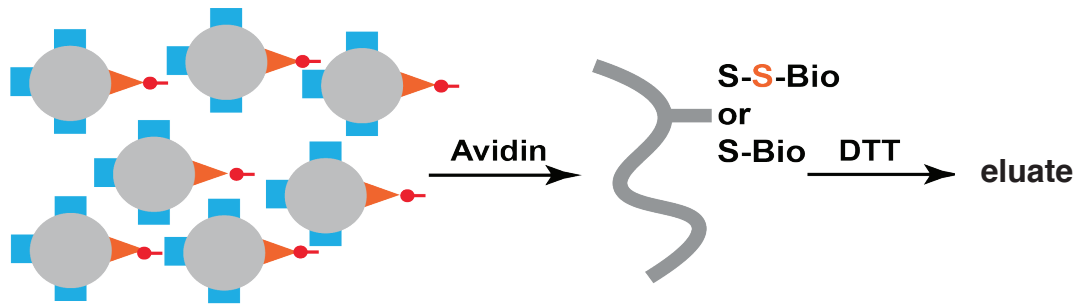

High concentration  
of NM-biotin

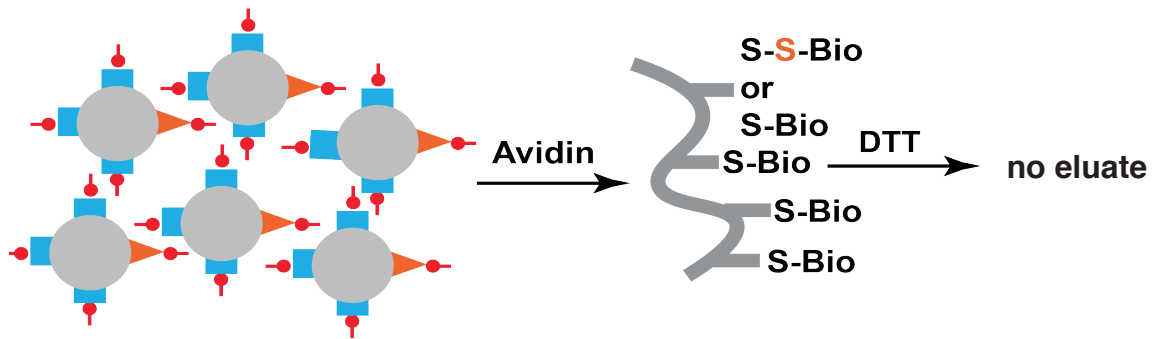

Nucleophilic reactivity of cysteine S group

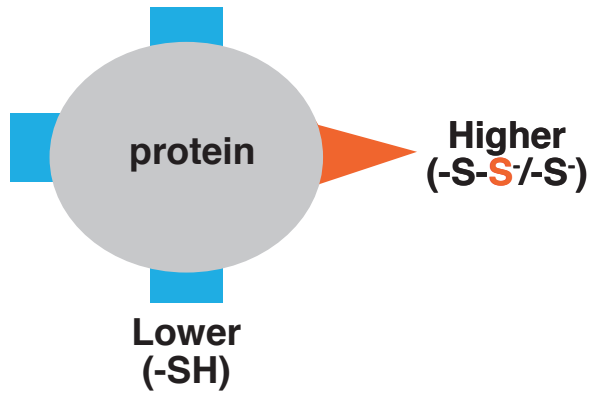

Supplement: supp [file elife_poa_e10067_Figure_2_figure_supplement_2.pdf › elife_poa_e10067_Figure_2_figure_supplement_2.pdf]
