# Supplementary material for: Quantitative H2S-mediated protein sulfhydration reveals metabolic reprogramming during the integrated stress response
Source: eLife journal article supplement (doi:10.7554/elife.10067), 2015-11-23
Supplement: supp [file elife_poa_e10067_Figure_2_figure_supplement_8.pdf › elife_poa_e10067_Figure_2_figure_supplement_8.pdf]

**A**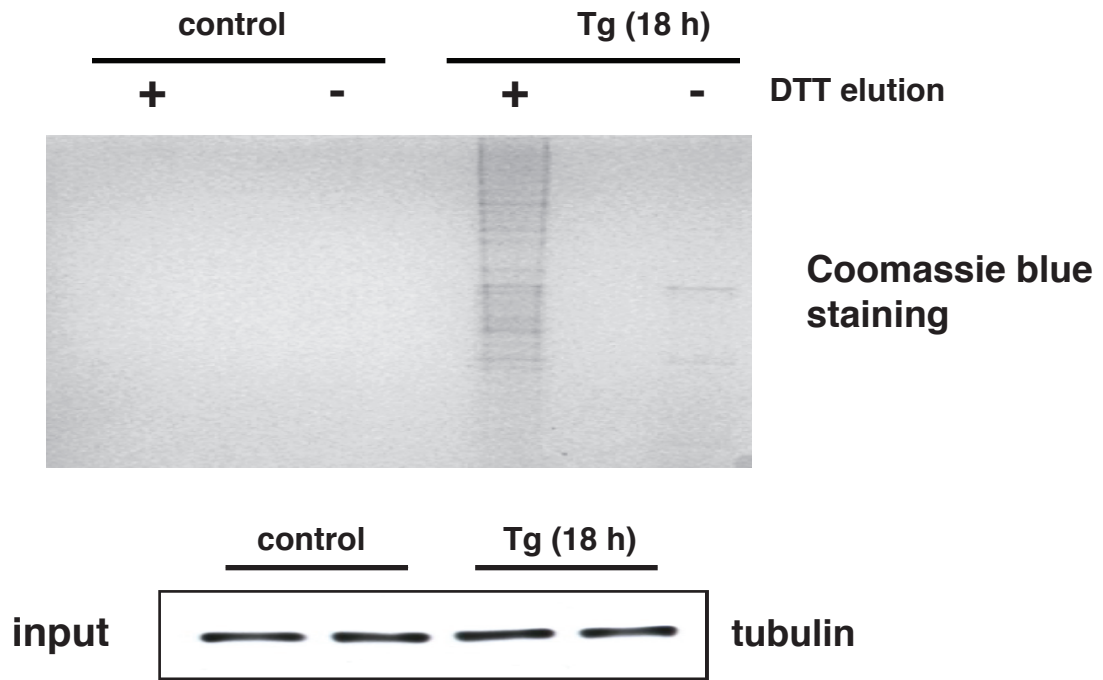**B**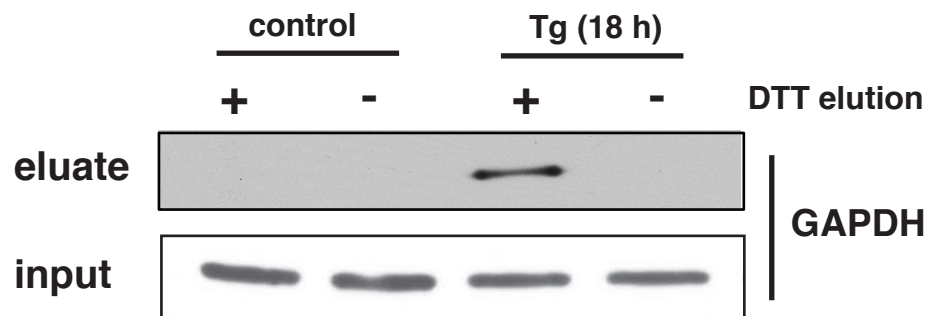**C**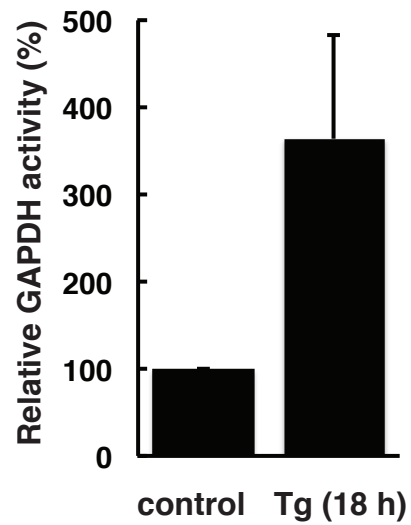

## D

|    | Protein id                       | Sequence coverage (%) |
|----|----------------------------------|-----------------------|
| 1  | Actin, cytoplasmic 2             | 45                    |
| 2  | eIF4A                            | 44                    |
| 3  | 78 kDa glucose-regulated protein | 42                    |
| 4  | ATP-citrate synthase             | 42                    |
| 5  | GAPDH                            | 41                    |
| 6  | Enolase                          | 39                    |
| 7  | PDIA6                            | 36                    |
| 8  | 40S ribosomal protein            | 33                    |
| 9  | Tubulin alpha 1B                 | 30                    |
| 10 | HSP 90                           | 29                    |
