# Supplementary material for: Quantitative H2S-mediated protein sulfhydration reveals metabolic reprogramming during the integrated stress response
Source: eLife journal article supplement (doi:10.7554/elife.10067), 2015-11-23
Supplement: supp [file elife_poa_e10067_Figure_3_figure_supplement_3.pdf › elife_poa_e10067_Figure_3_figure_supplement_3.pdf]

### GAD1

QLICDPSYIP

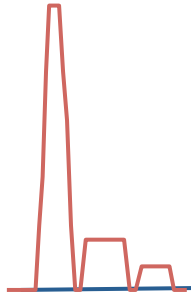

H/L: 25

IICILSHPIK DYLDQPCLETIN

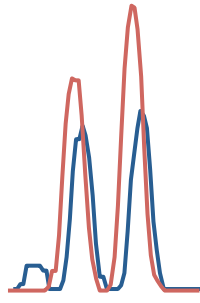

H/L: 1.7

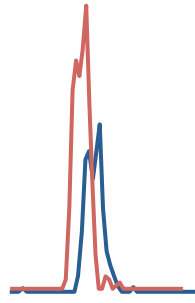

H/L: 1.8

### PHGDH

QSGQCAGAALD ENVISCPHLG

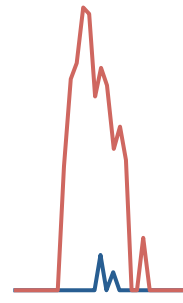

H/L: 53

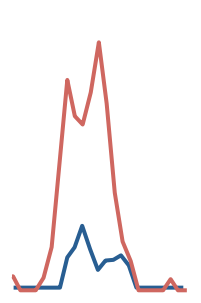

H/L: 5.9

### VCP

VGYYDDIGGCR

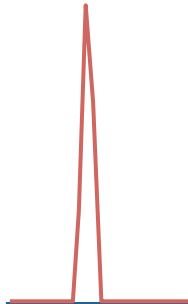

H/L: 25

VISIQPCPDVK SGADLTEICQR

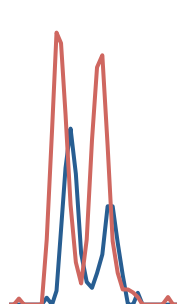

H/L: 1.6

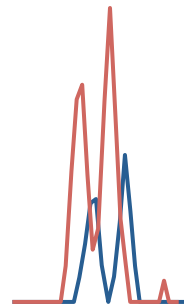

H/L: 2.1

### LAP3

GGAATICSAIVS AATICSAIVS

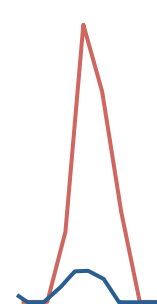

H/L: 12

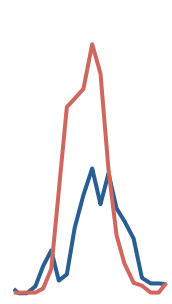

H/L: 2.1
