# Supplementary figures and images for: Quantitative H2S-mediated protein sulfhydration reveals metabolic reprogramming during the integrated stress response
Source: eLife journal article supplement (doi:10.7554/elife.10067), 2015-11-23

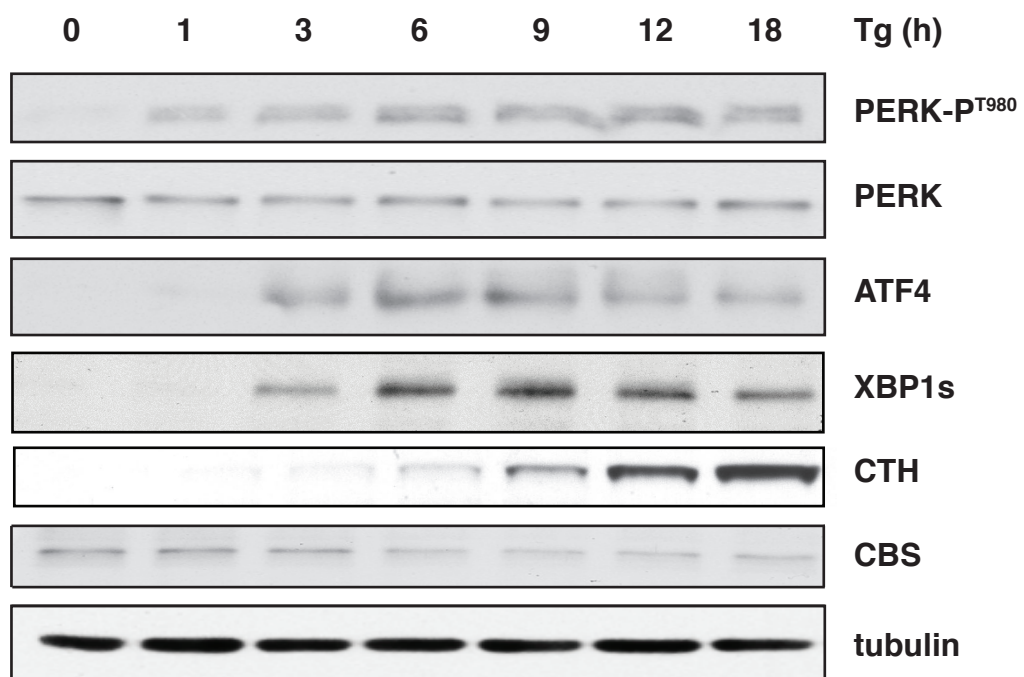

Supplement: supp [file elife_poa_e10067_Figure_1_figure_supplement_1.pdf › elife_poa_e10067_Figure_1_figure_supplement_1.pdf]

**A**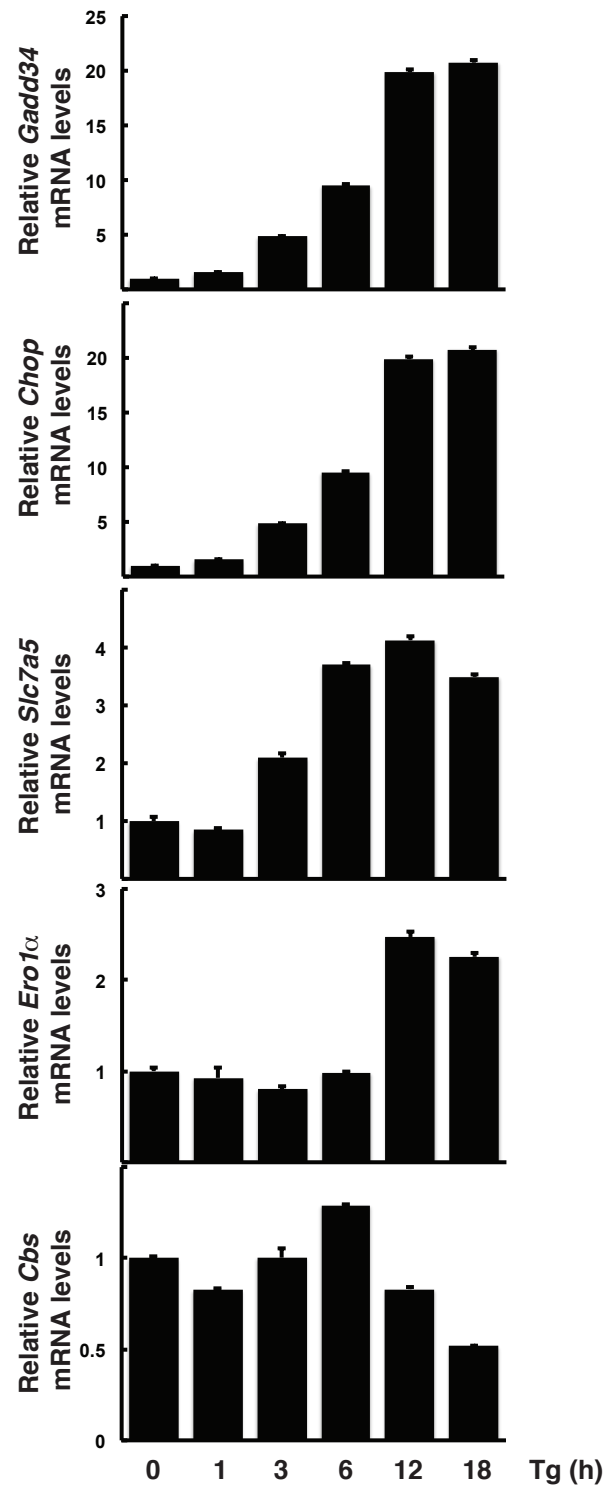

**B** Human islets relative mRNAs levels

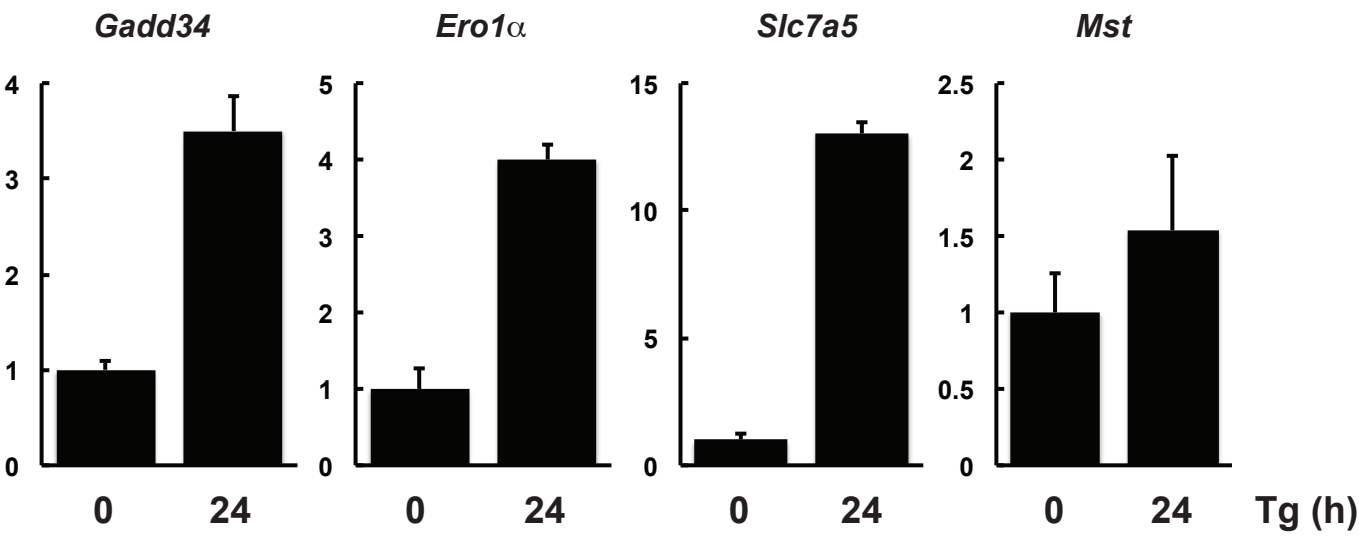

**C** Mouse islets relative mRNAs levels

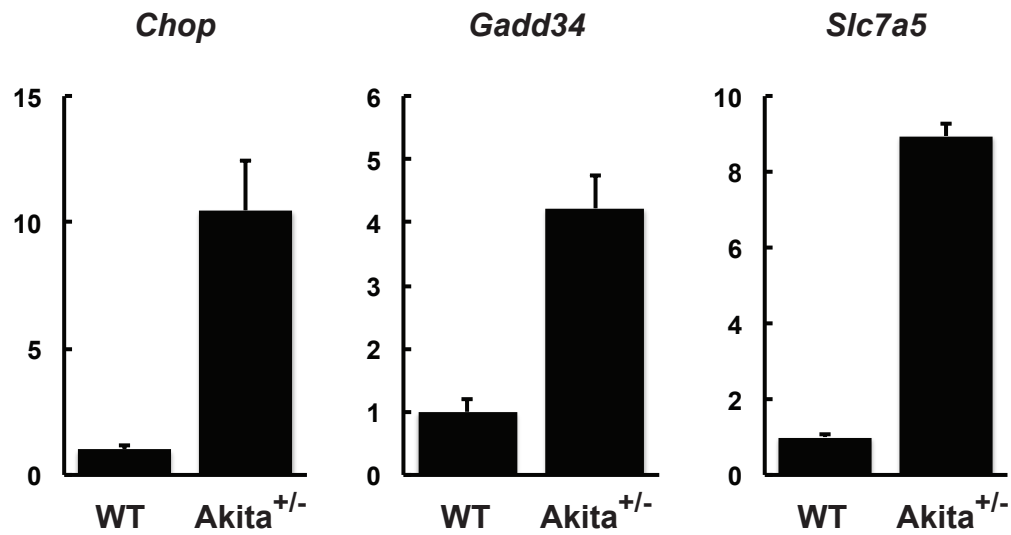

Supplement: supp [file elife_poa_e10067_Figure_1_figure_supplement_2.pdf › elife_poa_e10067_Figure_1_figure_supplement_2.pdf]

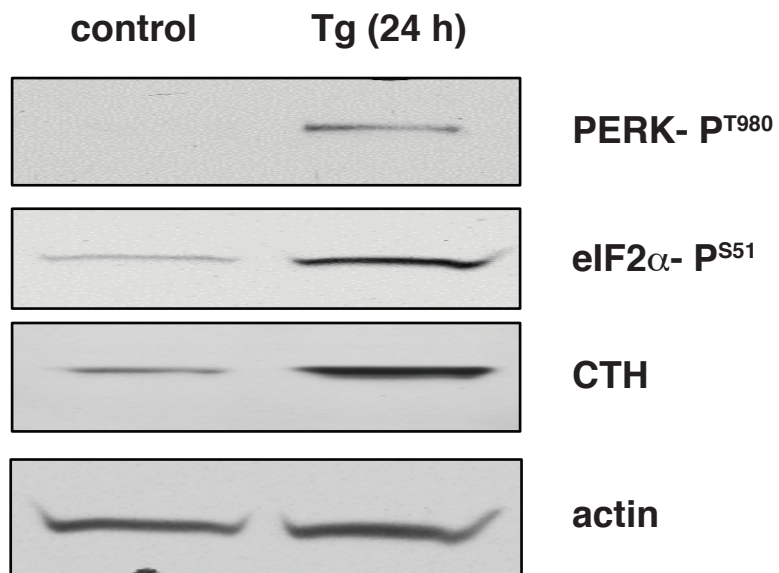

Supplement: supp [file elife_poa_e10067_Figure_1_figure_supplement_3.pdf › elife_poa_e10067_Figure_1_figure_supplement_3.pdf]

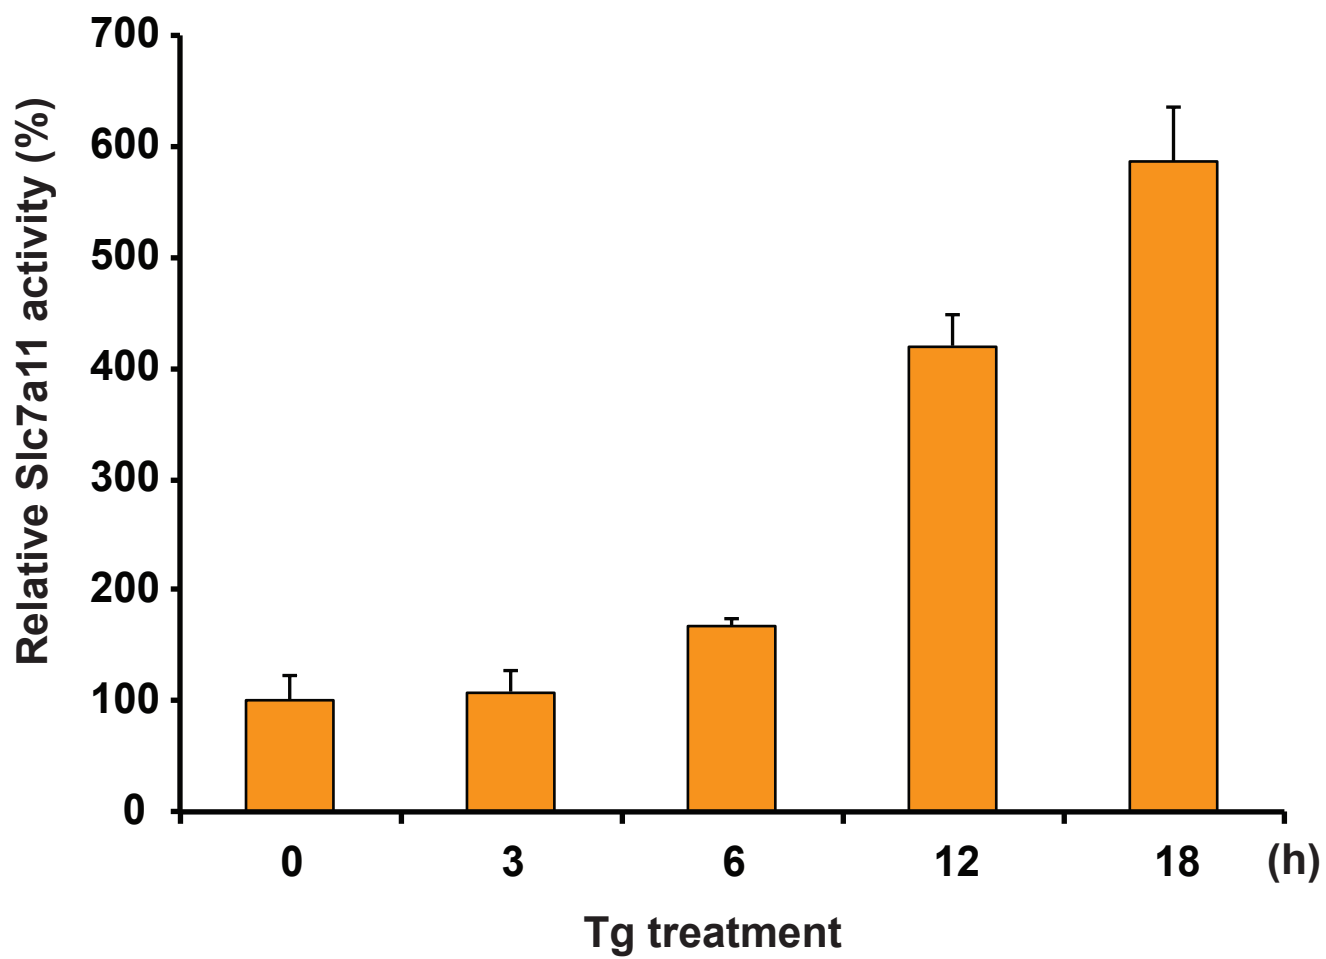

Supplement: supp [file elife_poa_e10067_Figure_1_figure_supplement_4.pdf › elife_poa_e10067_Figure_1_figure_supplement_4.pdf]

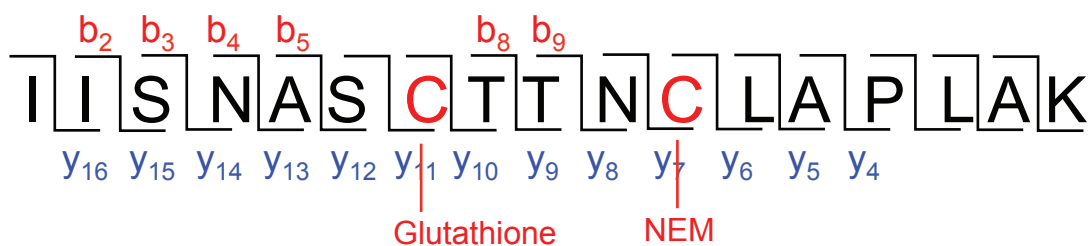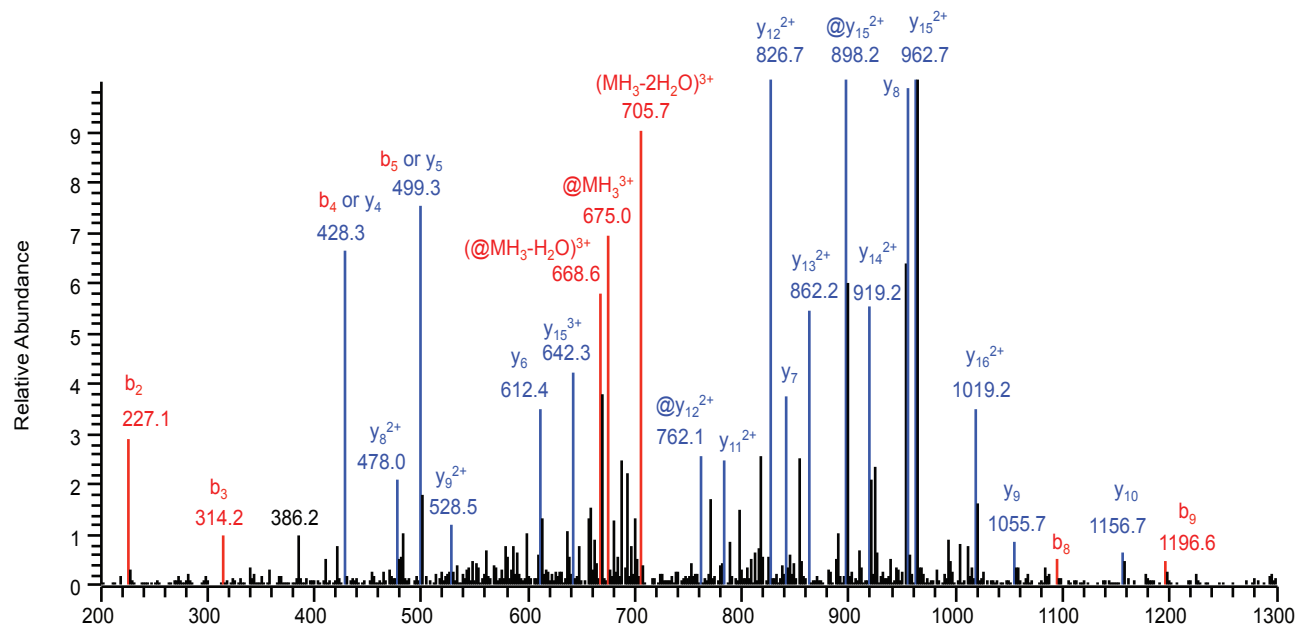

Supplement: supp [file elife_poa_e10067_Figure_1_figure_supplement_5.pdf › elife_poa_e10067_Figure_1_figure_supplement_5.pdf]

MIN6 relative mRNAs levels

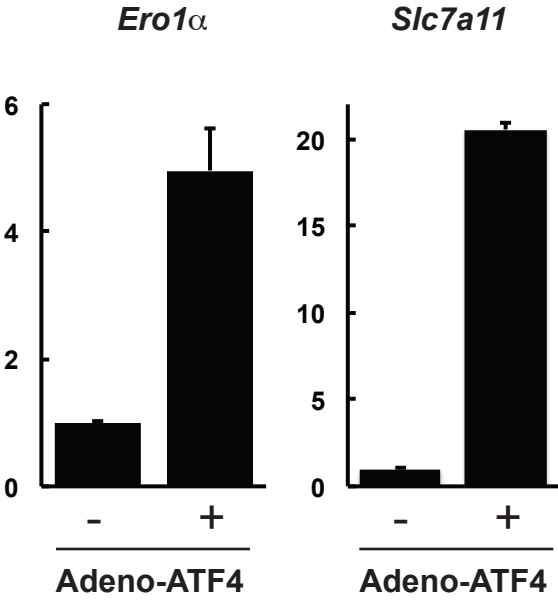

Supplement: supp [file elife_poa_e10067_Figure_2_figure_supplement_1.pdf › elife_poa_e10067_Figure_2_figure_supplement_1.pdf]

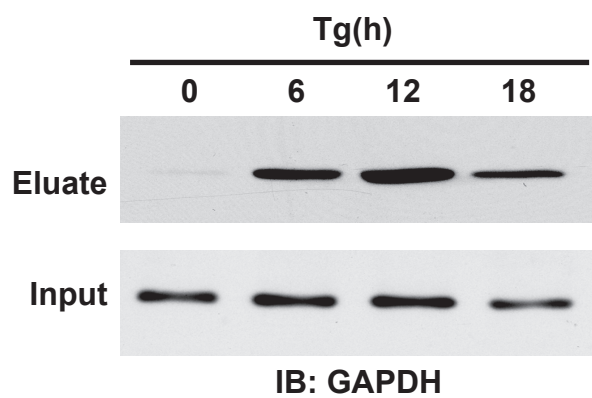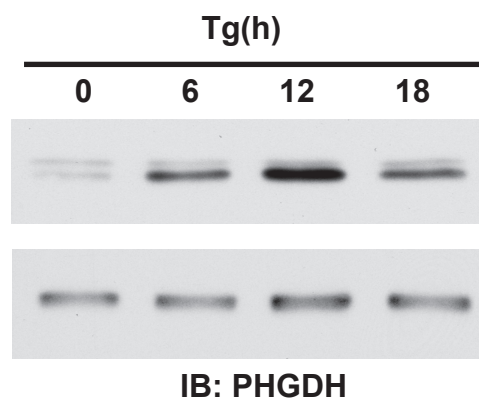

Supplement: supp [file elife_poa_e10067_Figure_2_figure_supplement_10.pdf › elife_poa_e10067_Figure_2_figure_supplement_10.pdf]

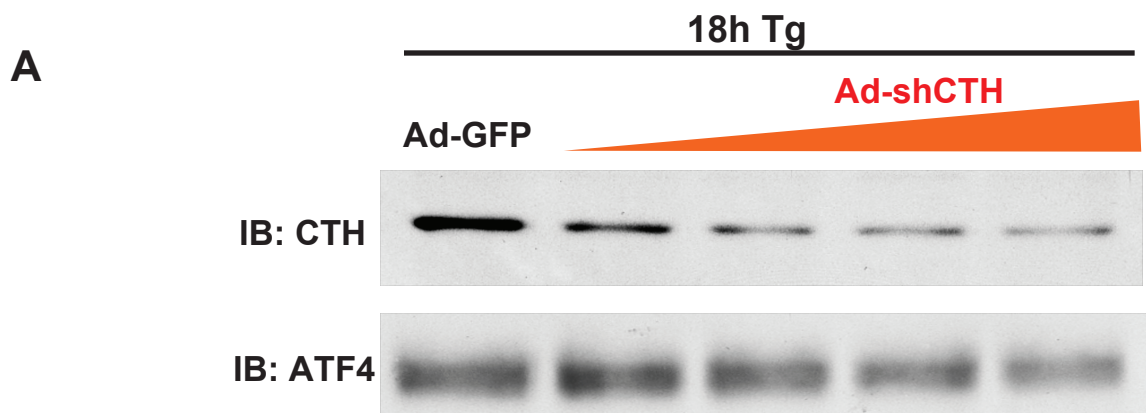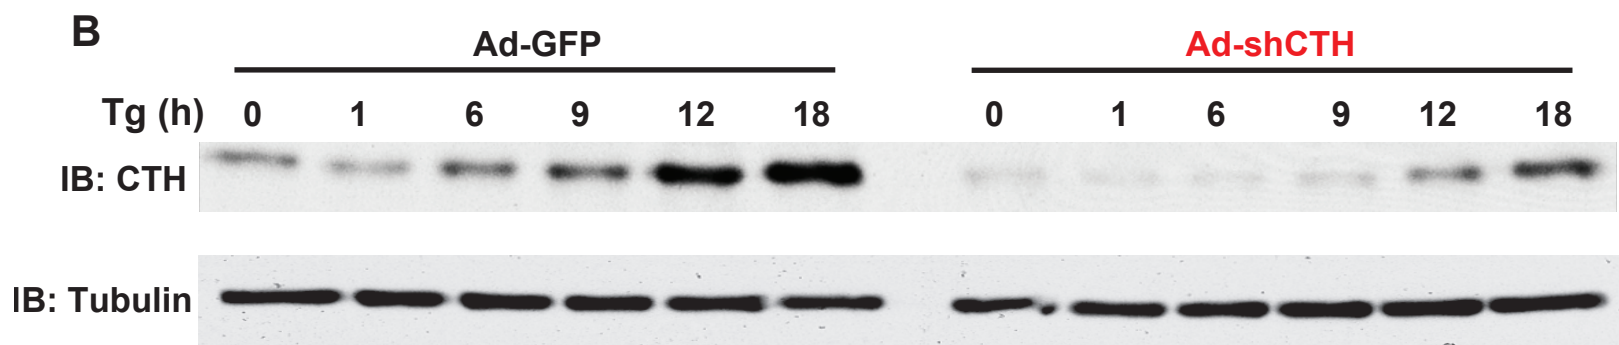

**C**

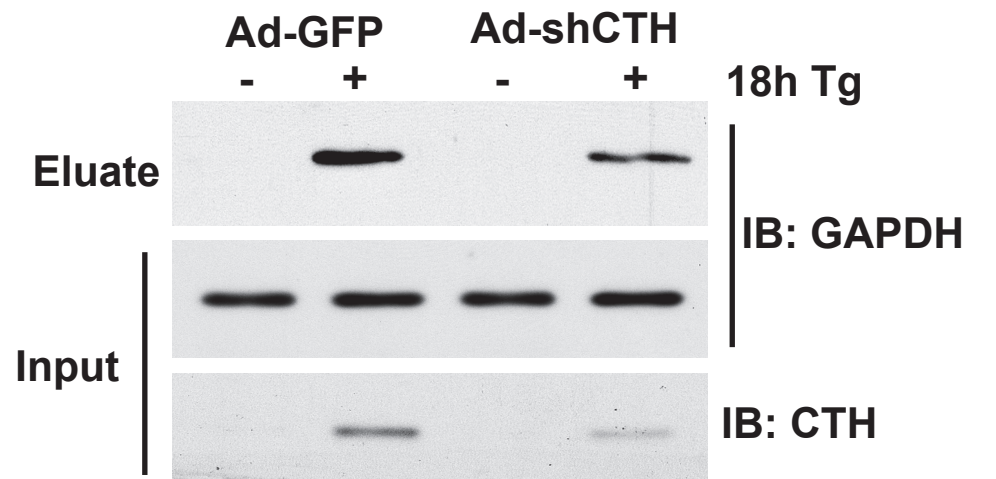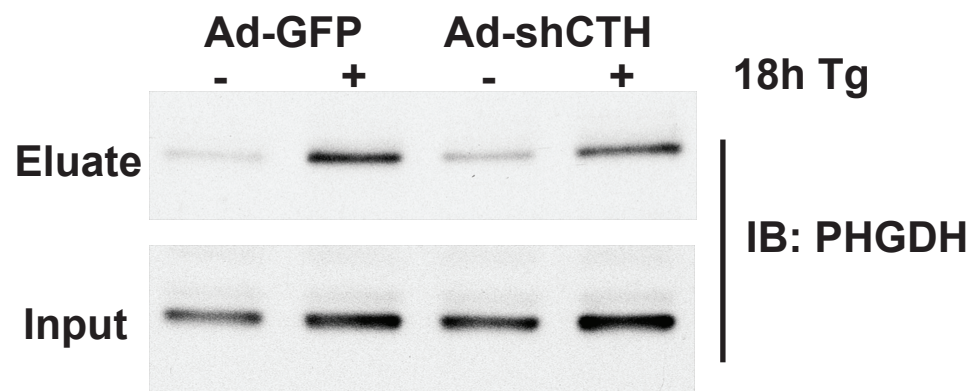

Supplement: supp [file elife_poa_e10067_Figure_2_figure_supplement_11.pdf › elife_poa_e10067_Figure_2_figure_supplement_11.pdf]

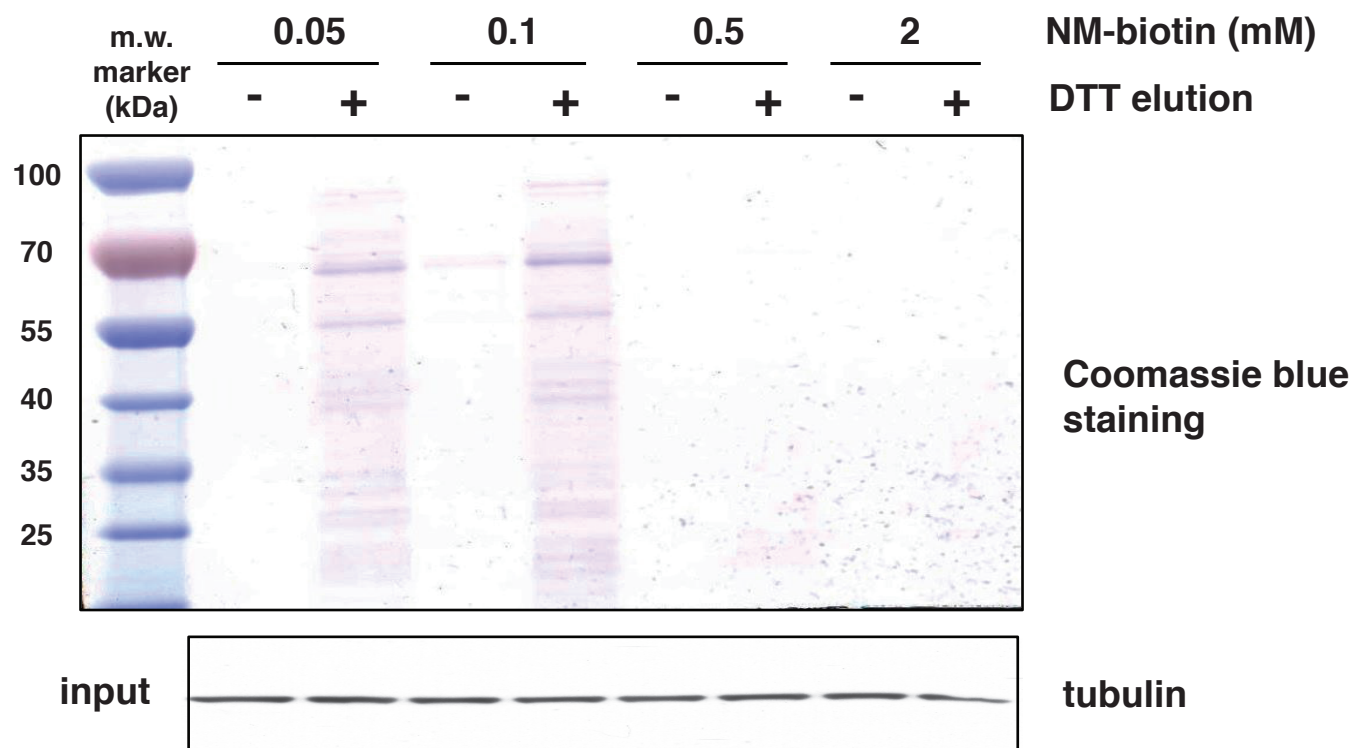

Supplement: supp [file elife_poa_e10067_Figure_2_figure_supplement_3.pdf › elife_poa_e10067_Figure_2_figure_supplement_3.pdf]

**A**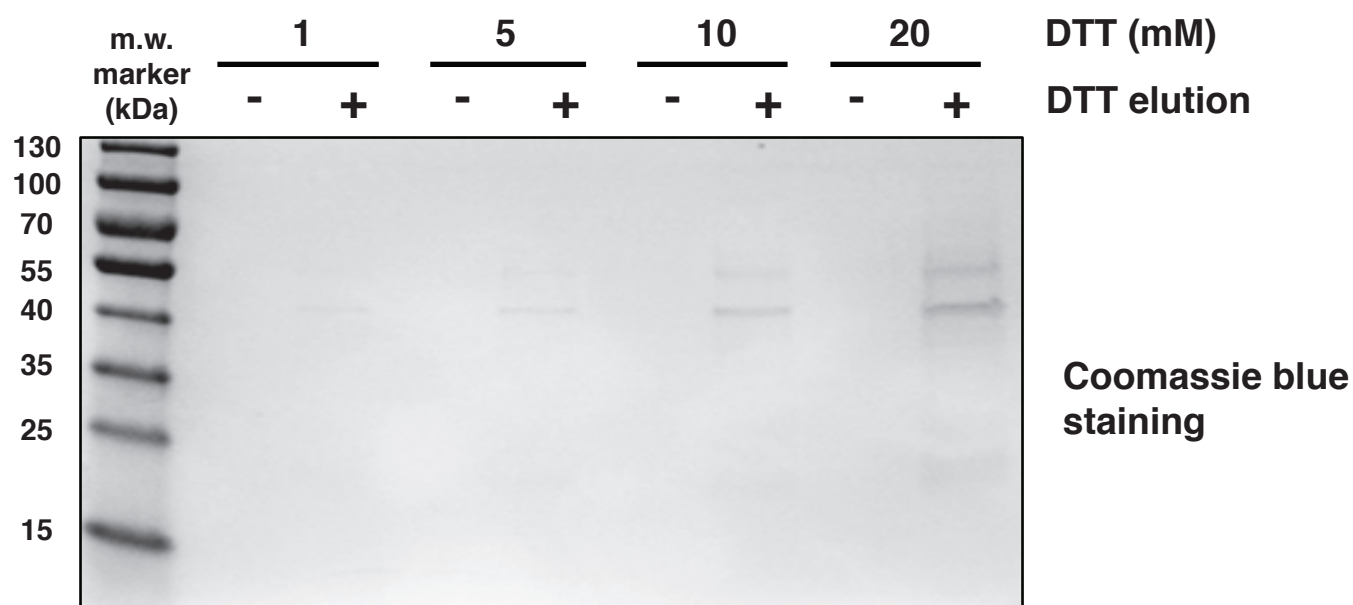**B**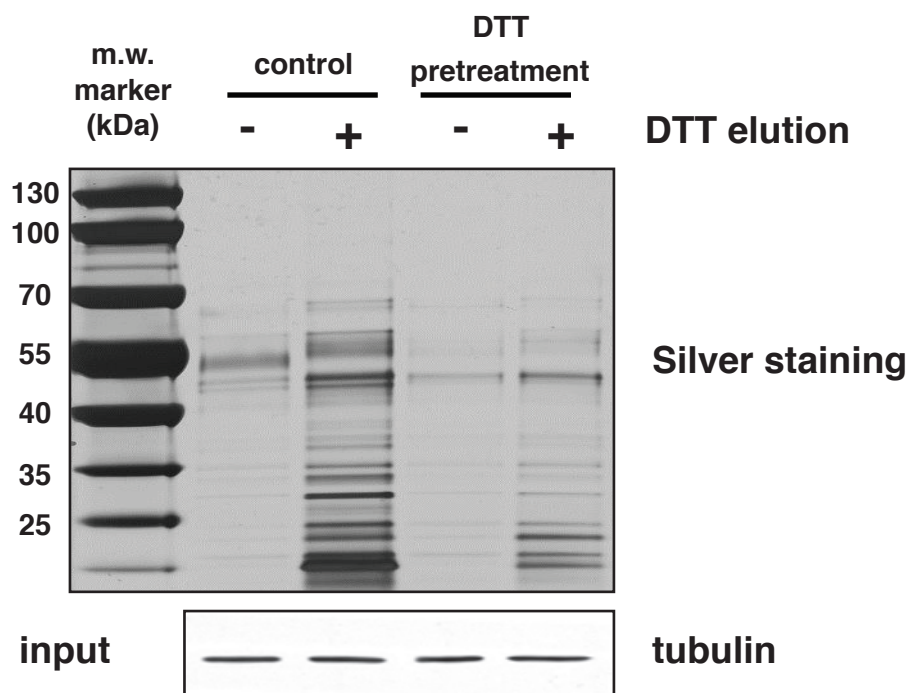

Supplement: supp [file elife_poa_e10067_Figure_2_figure_supplement_4.pdf › elife_poa_e10067_Figure_2_figure_supplement_4.pdf]

**A**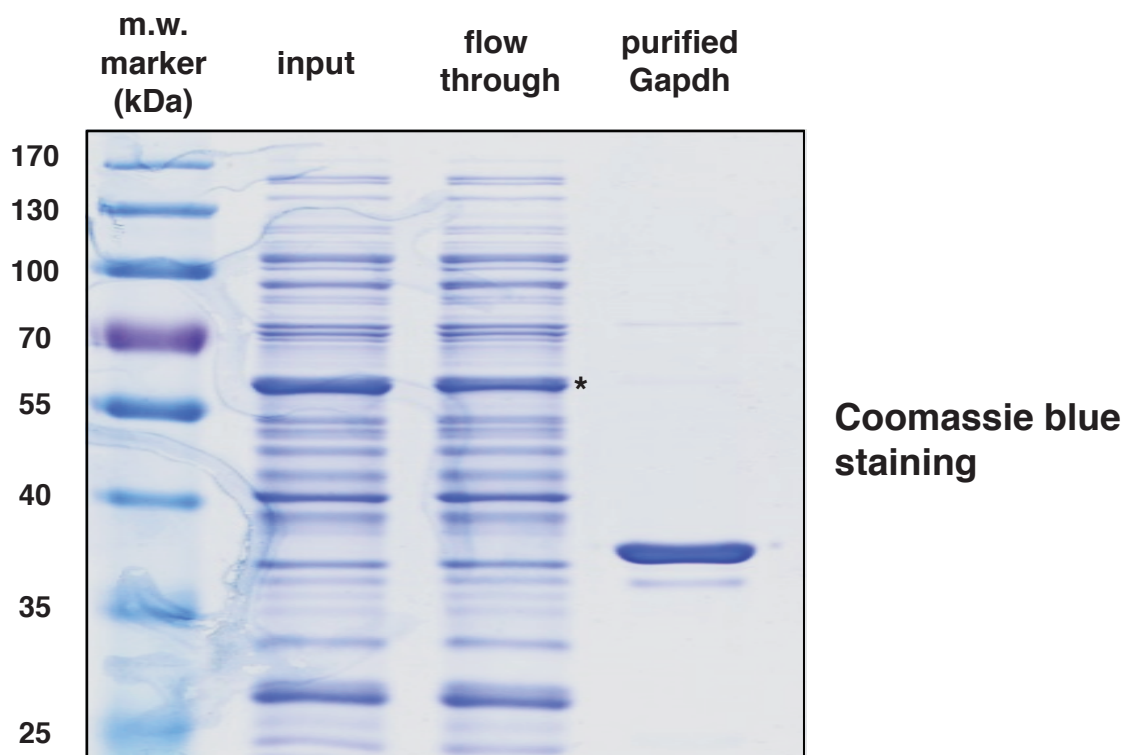**B**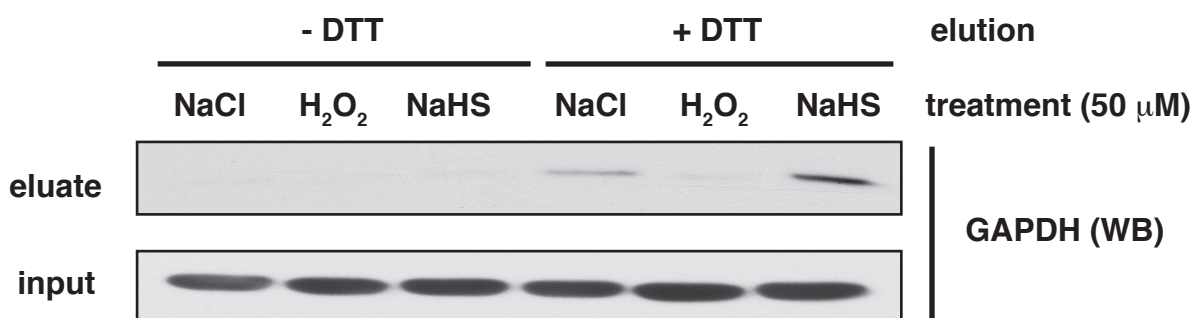

Supplement: supp [file elife_poa_e10067_Figure_2_figure_supplement_5.pdf › elife_poa_e10067_Figure_2_figure_supplement_5.pdf]

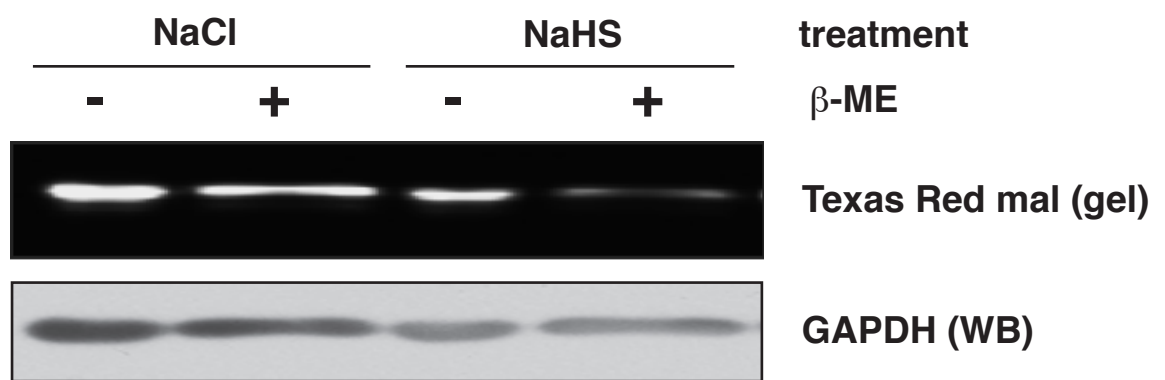

Supplement: supp [file elife_poa_e10067_Figure_2_figure_supplement_6.pdf › elife_poa_e10067_Figure_2_figure_supplement_6.pdf]

**A**

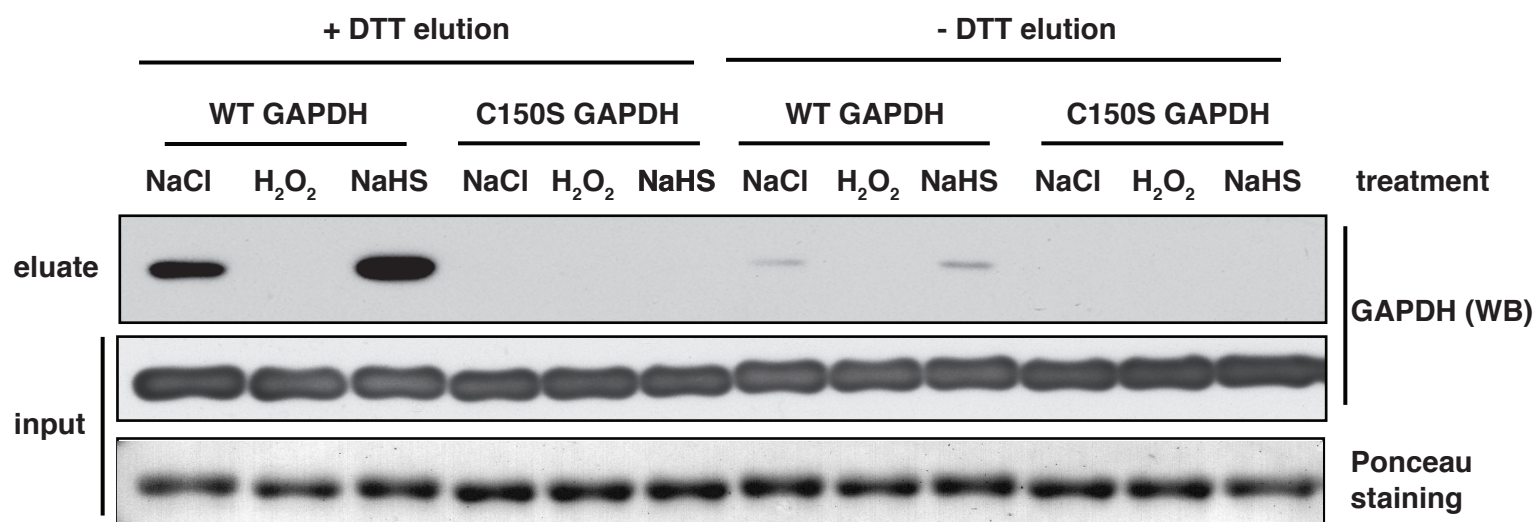

**B**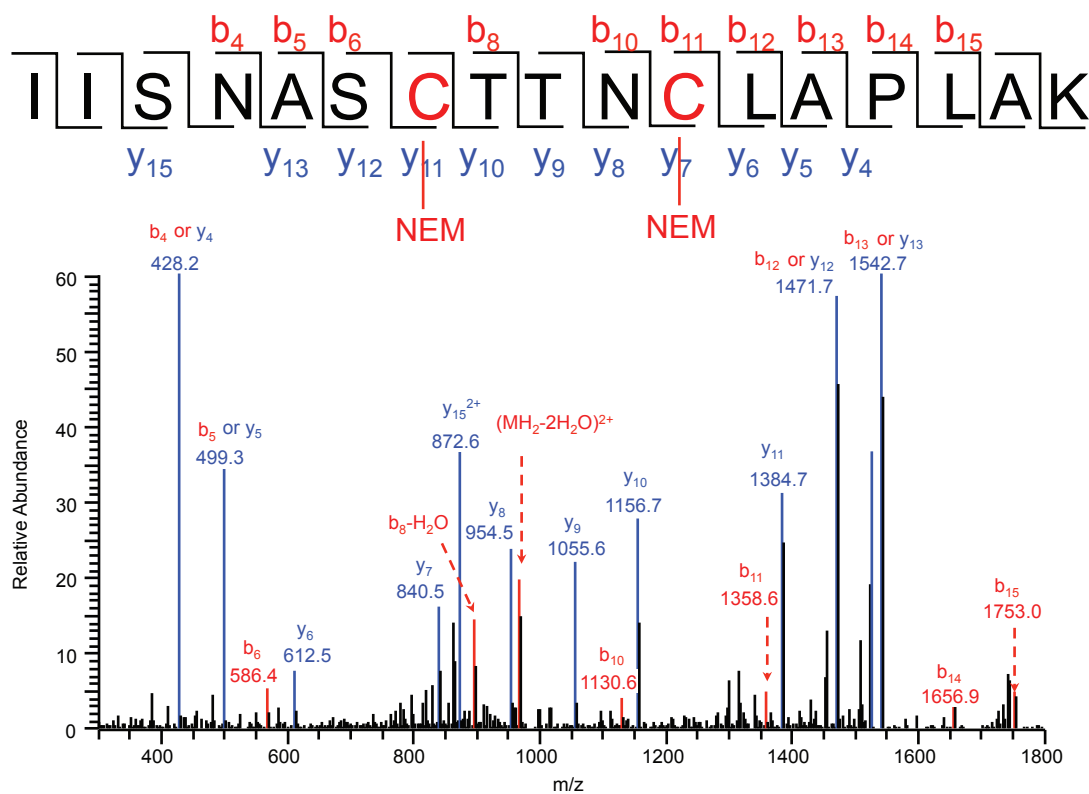**C**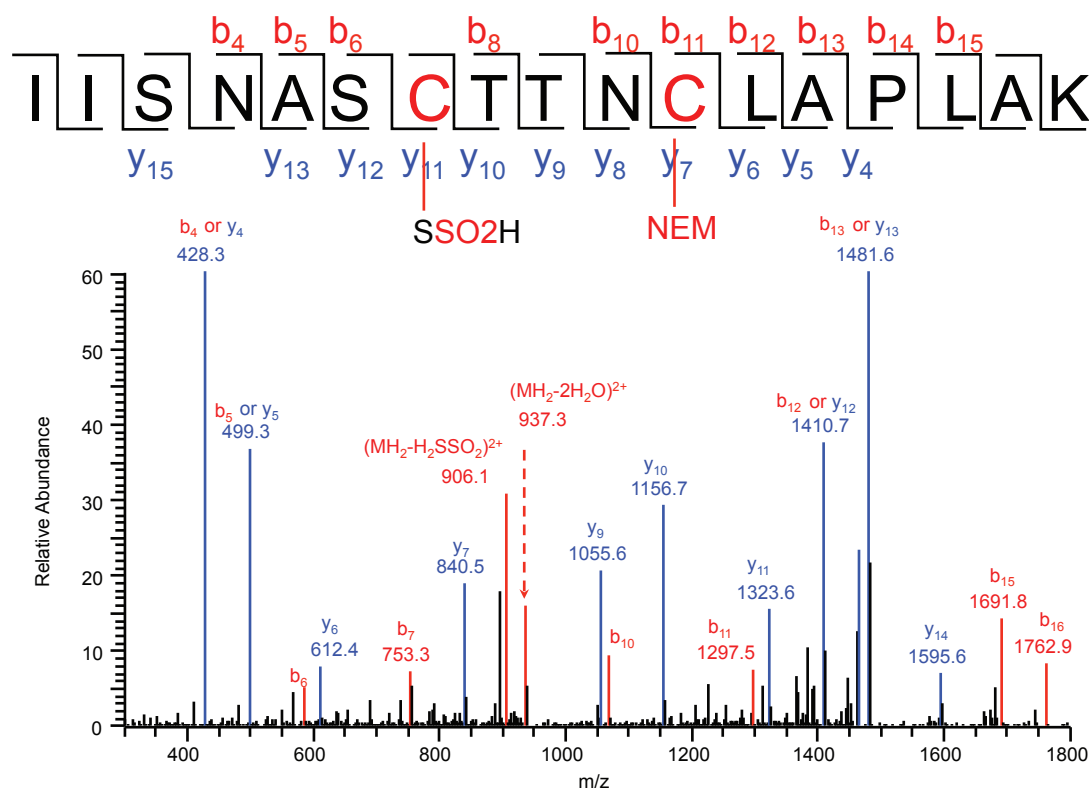

Supplement: supp [file elife_poa_e10067_Figure_2_figure_supplement_7.pdf › elife_poa_e10067_Figure_2_figure_supplement_7.pdf]

RP-HPLC coupled MS

RT: 0.00 - 90.00

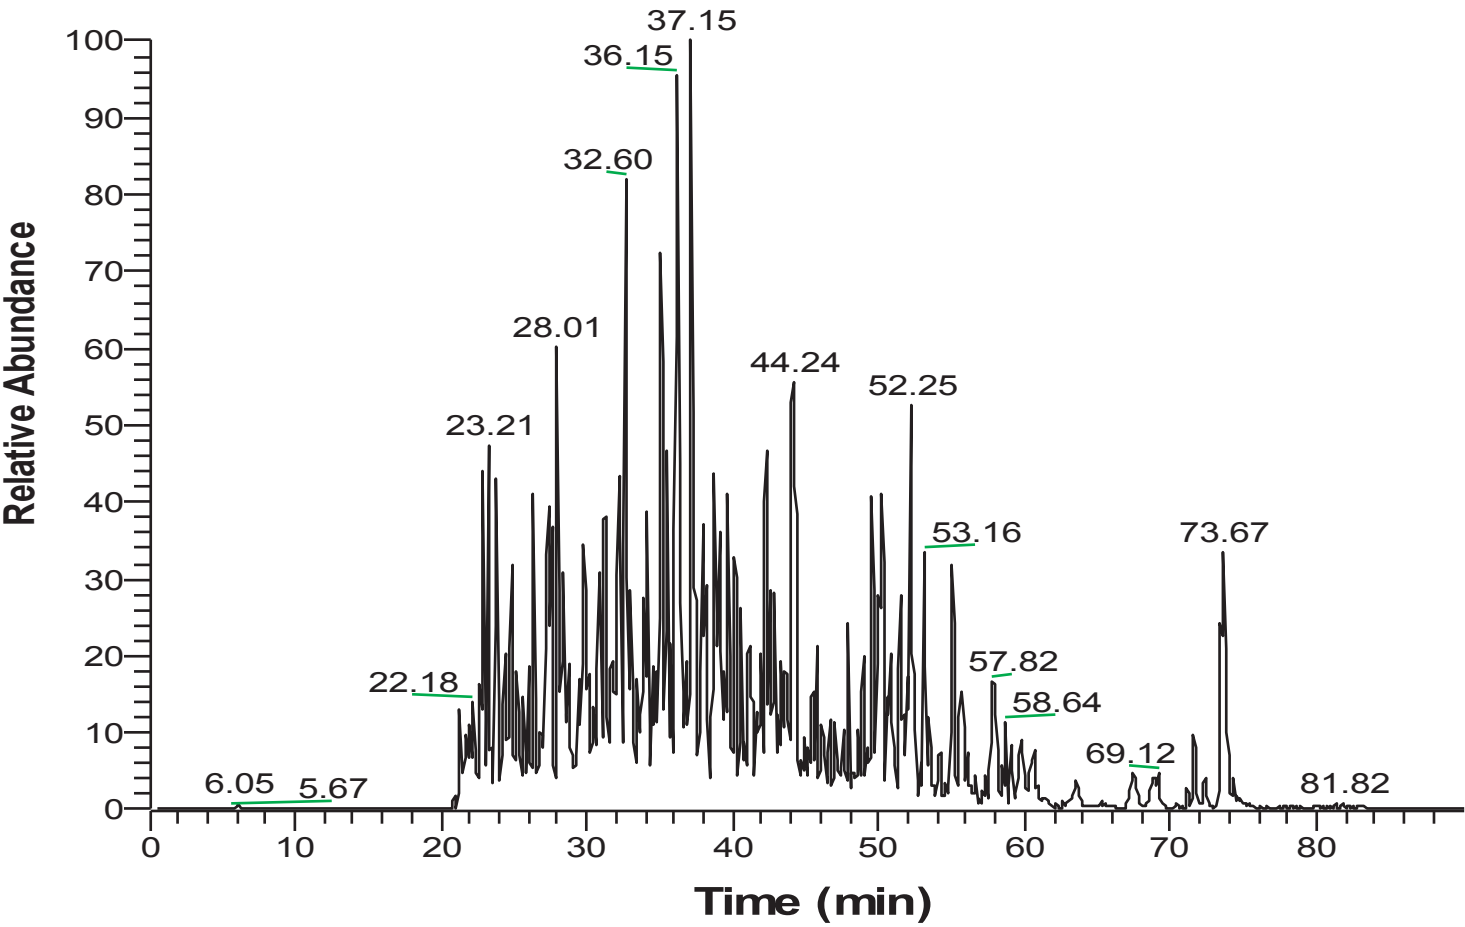

Supplement: supp [file elife_poa_e10067_Figure_2_figure_supplement_9.pdf › elife_poa_e10067_Figure_2_figure_supplement_9.pdf]

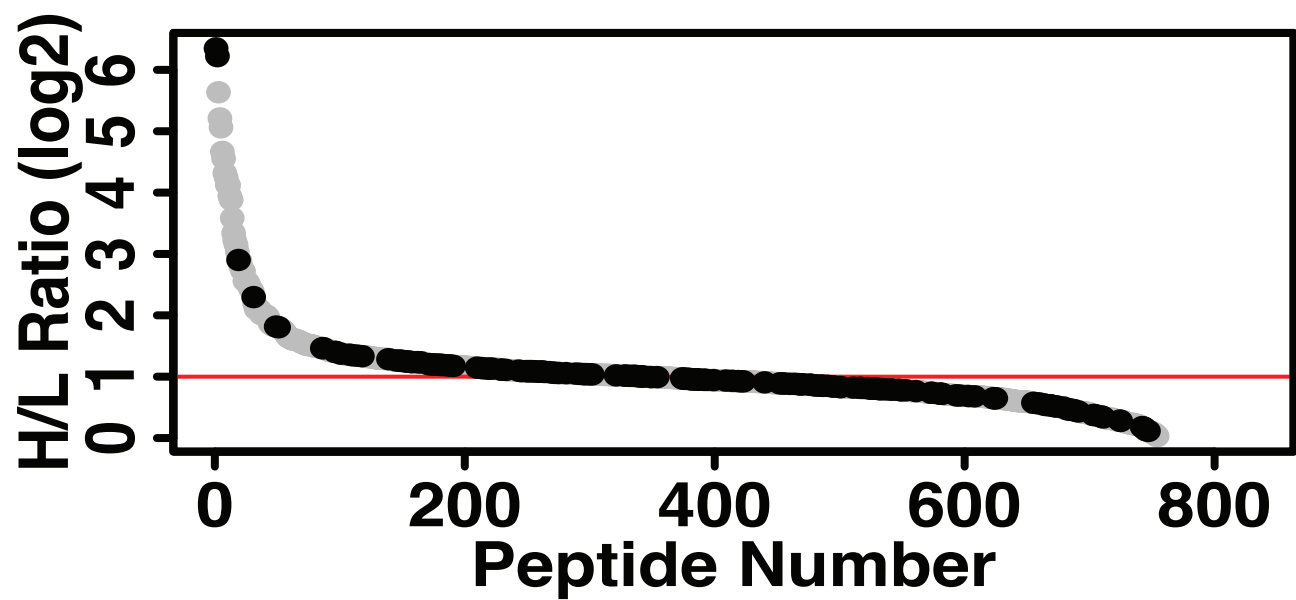

Supplement: supp [file elife_poa_e10067_Figure_3_figure_supplement_1.pdf › elife_poa_e10067_Figure_3_figure_supplement_1.pdf]

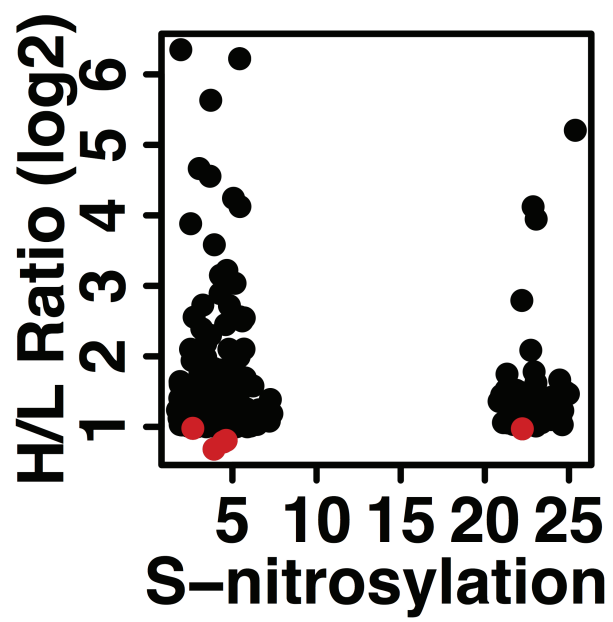

Supplement: supp [file elife_poa_e10067_Figure_3_figure_supplement_2.pdf › elife_poa_e10067_Figure_3_figure_supplement_2.pdf]

**A**

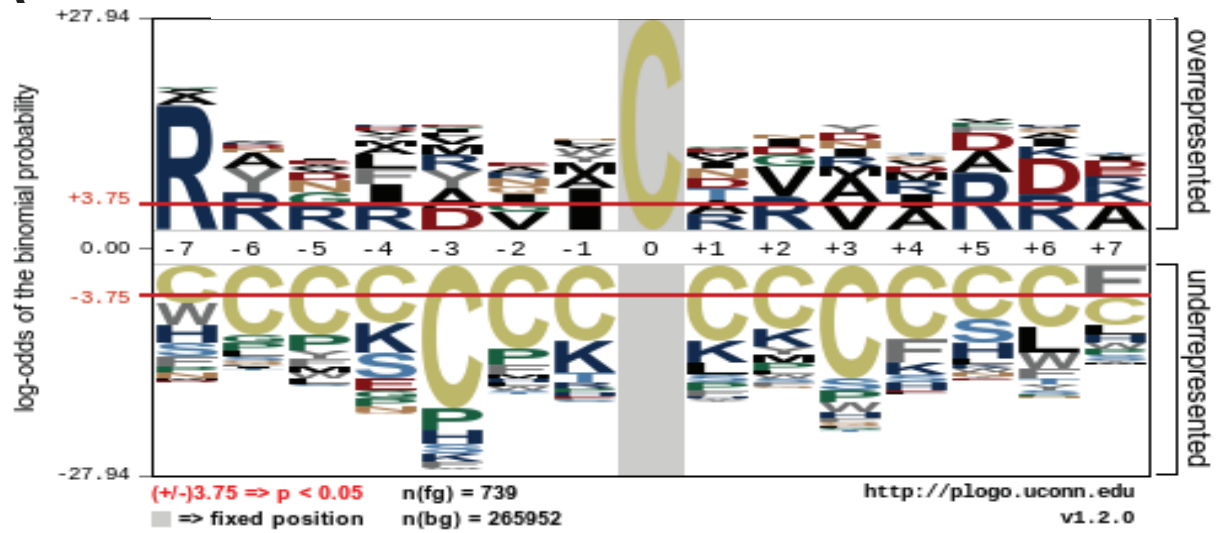

**B**

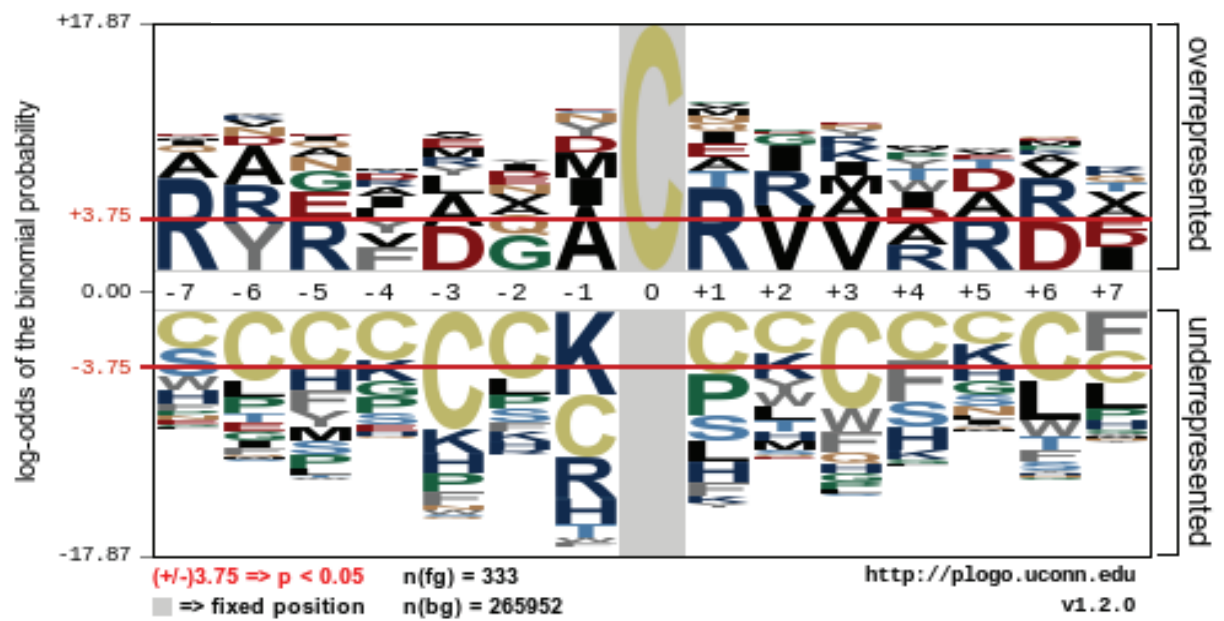

C

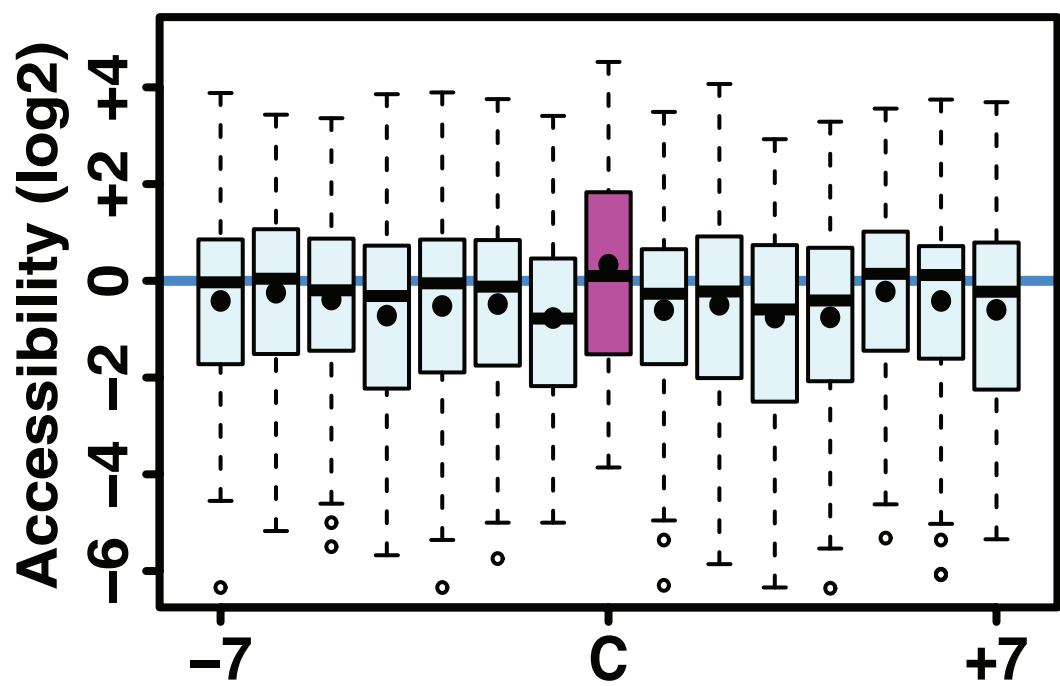

D

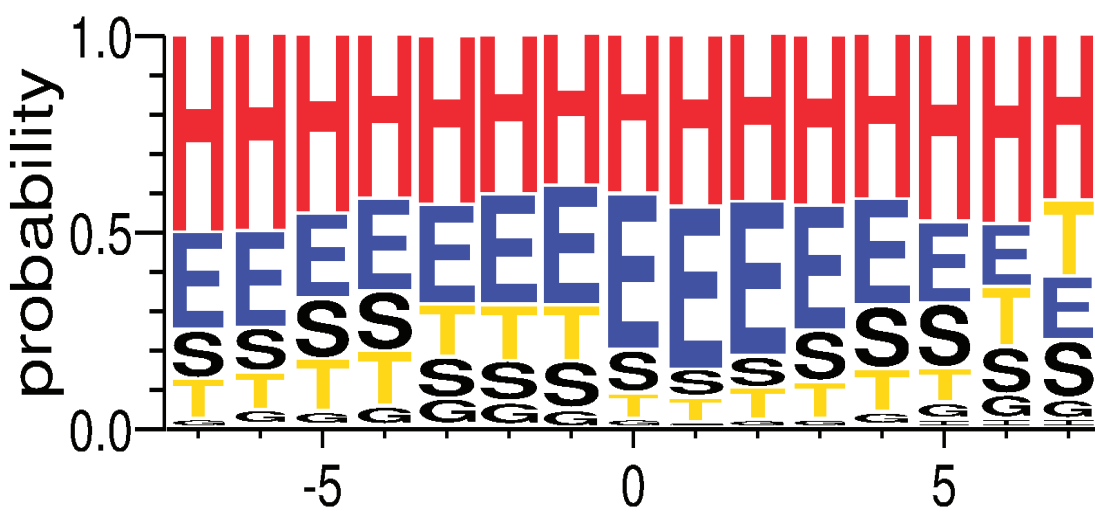

Supplement: supp [file elife_poa_e10067_Figure_3_figure_supplement_4.pdf › elife_poa_e10067_Figure_3_figure_supplement_4.pdf]

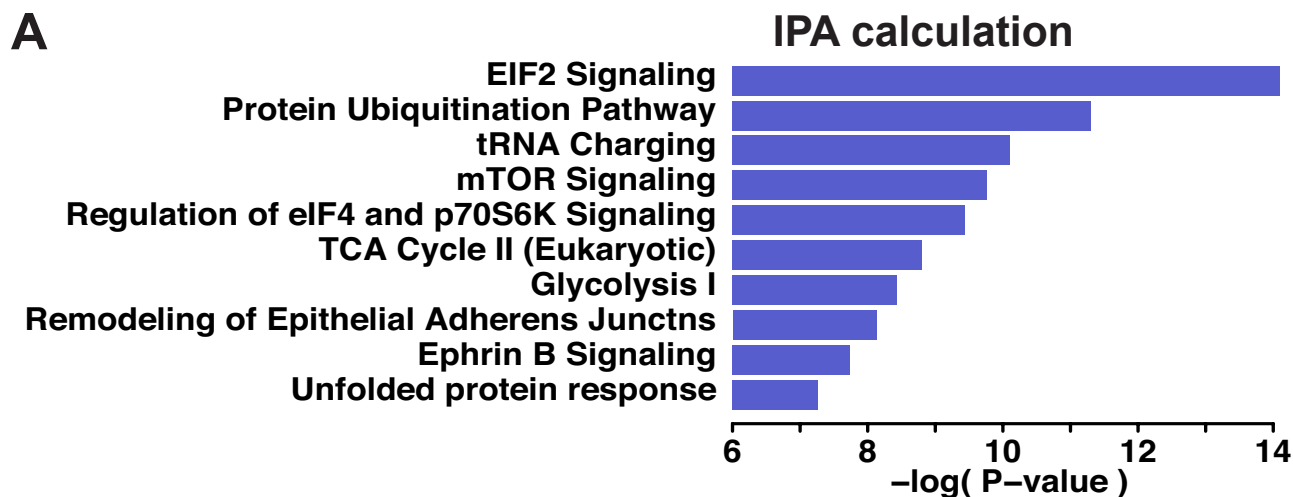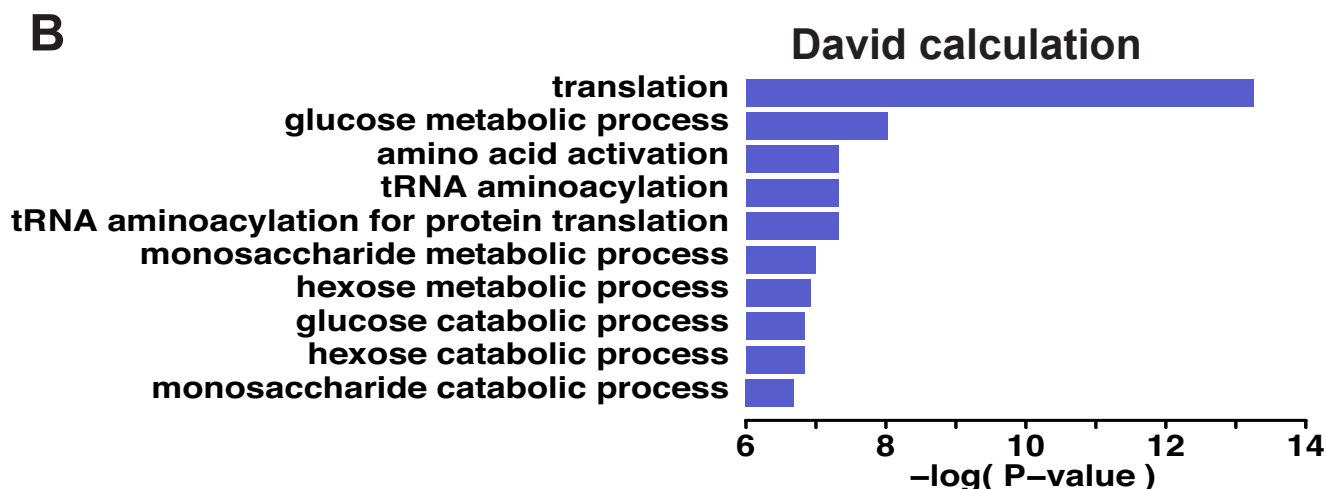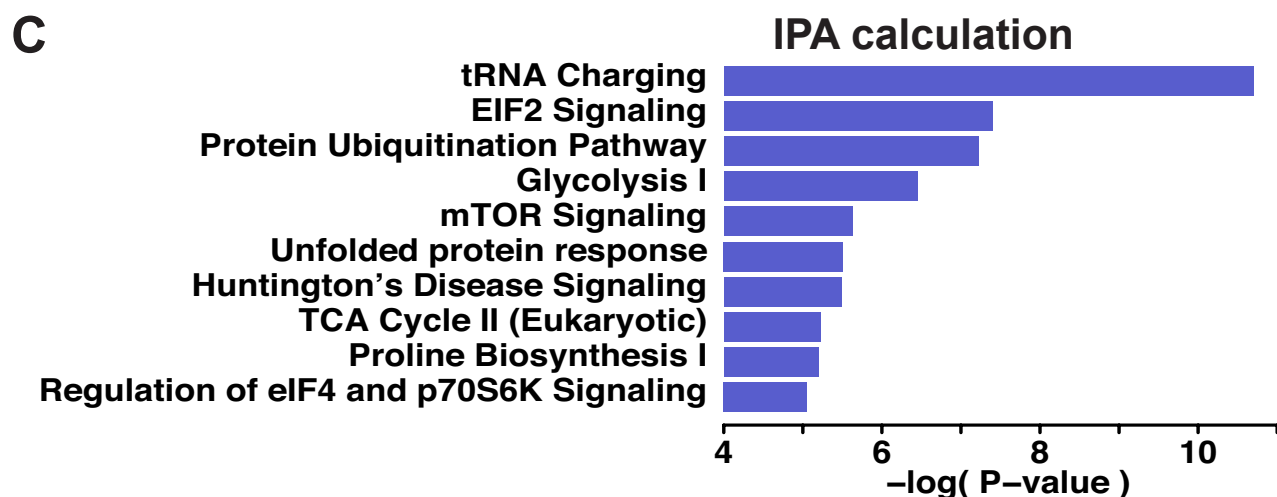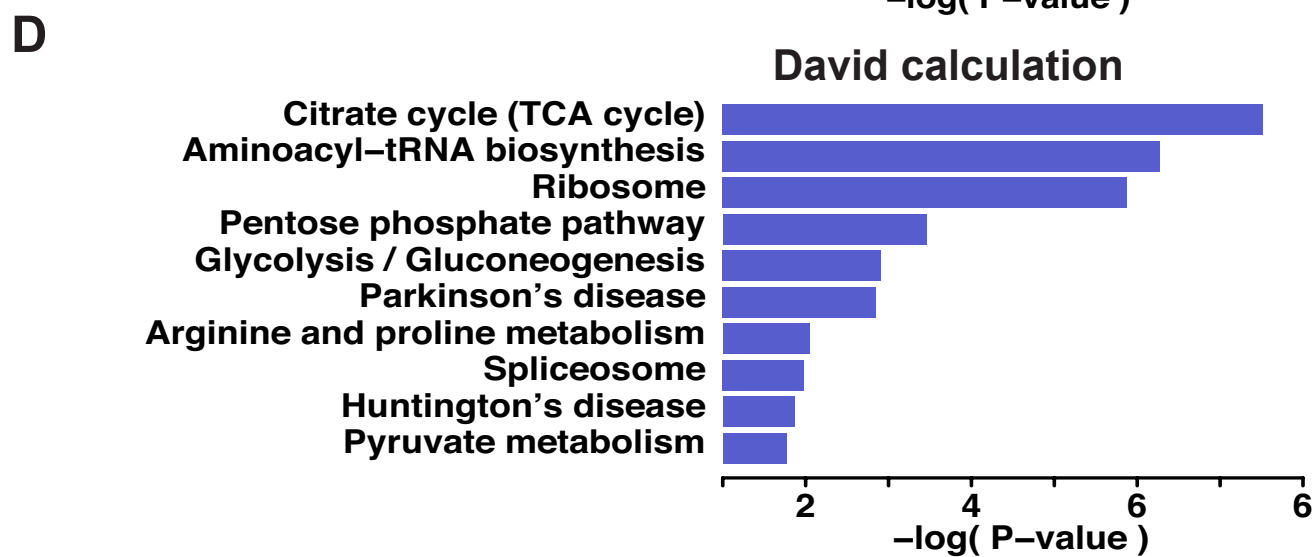

Supplement: supp [file elife_poa_e10067_Figure_3_figure_supplement_5.pdf › elife_poa_e10067_Figure_3_figure_supplement_5.pdf]

# RP-HPLC coupled MS

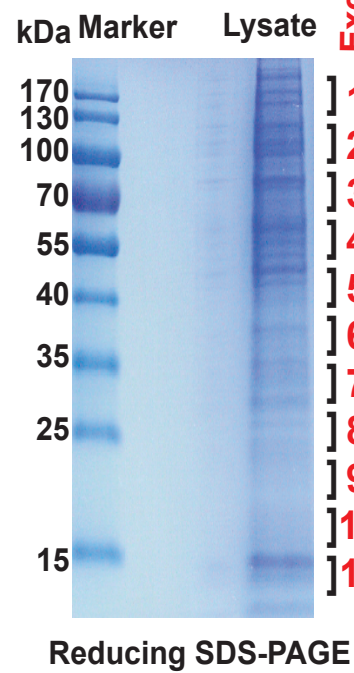

Excise area

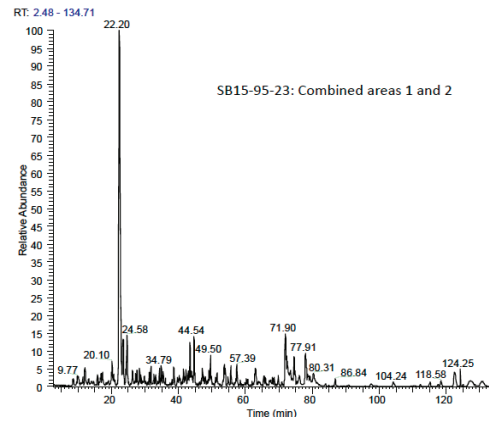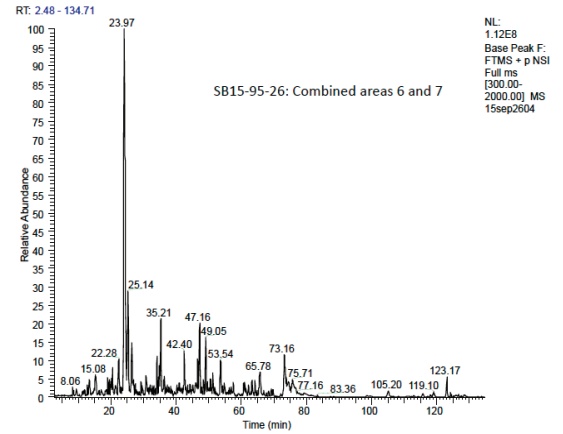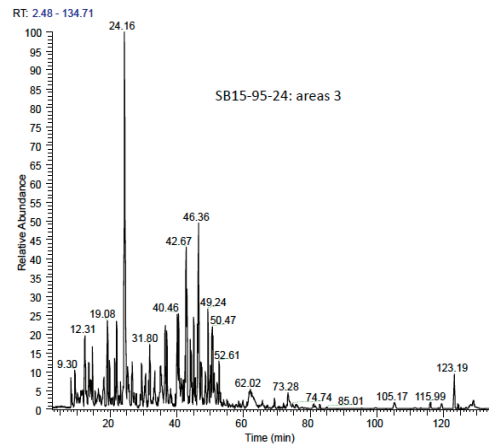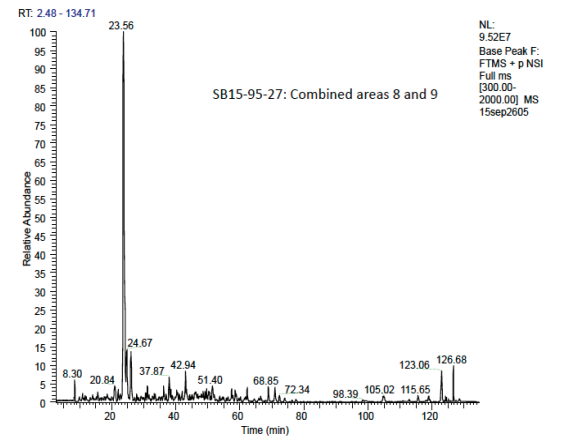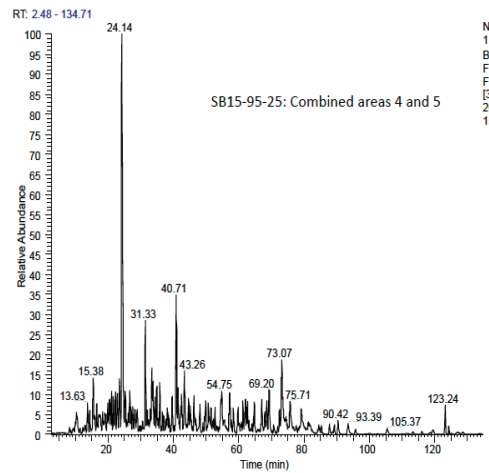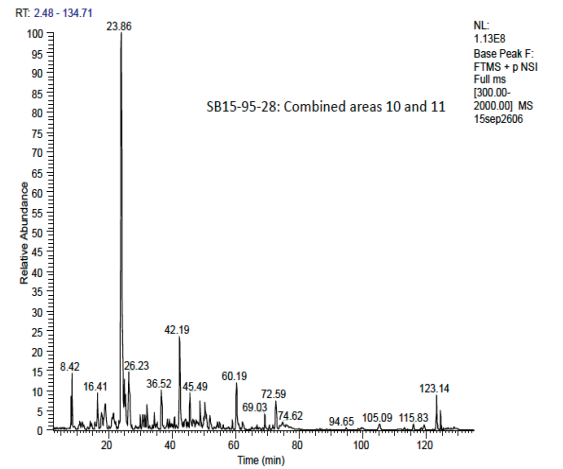

Supplement: supp [file elife_poa_e10067_Figure_3_figure_supplement_6.pdf › elife_poa_e10067_Figure_3_figure_supplement_6.pdf]

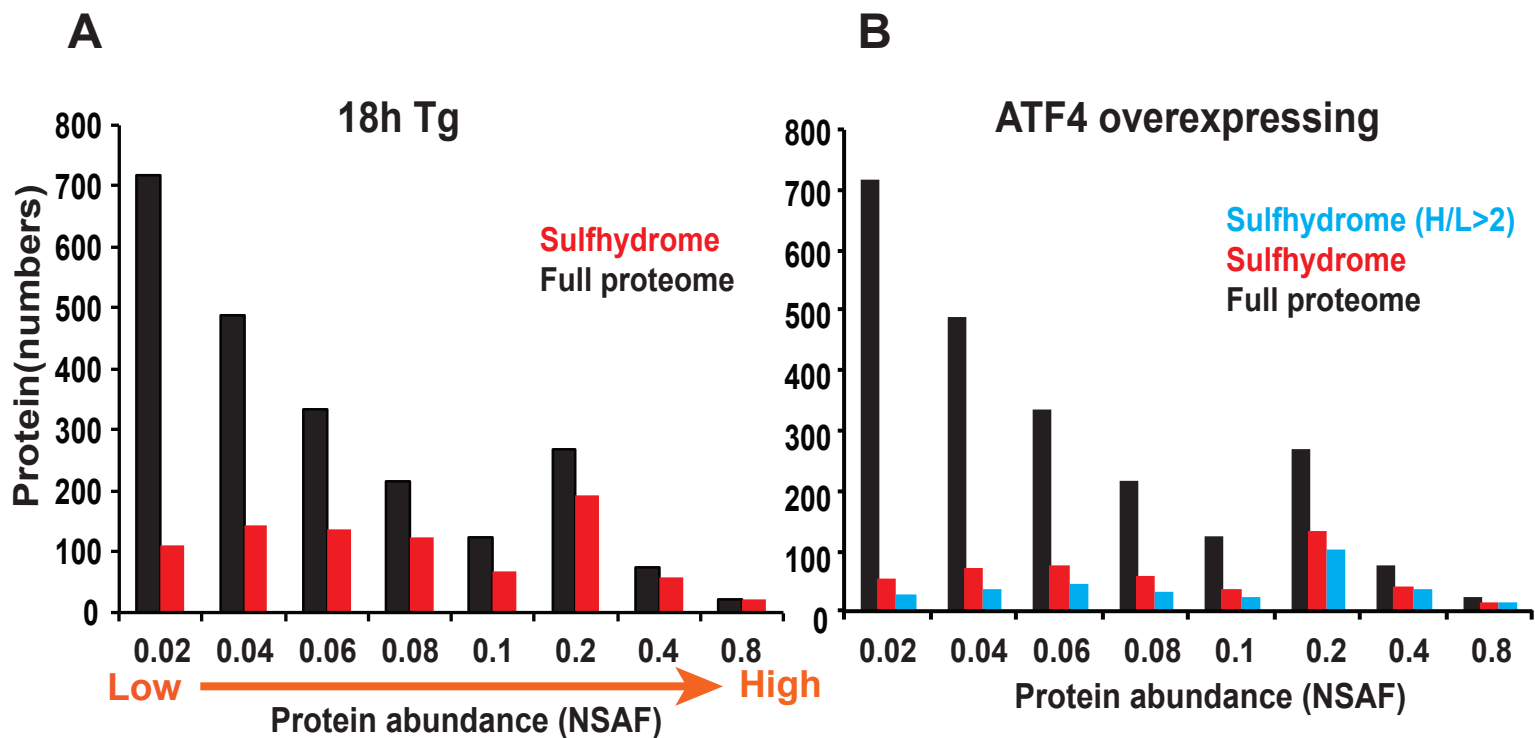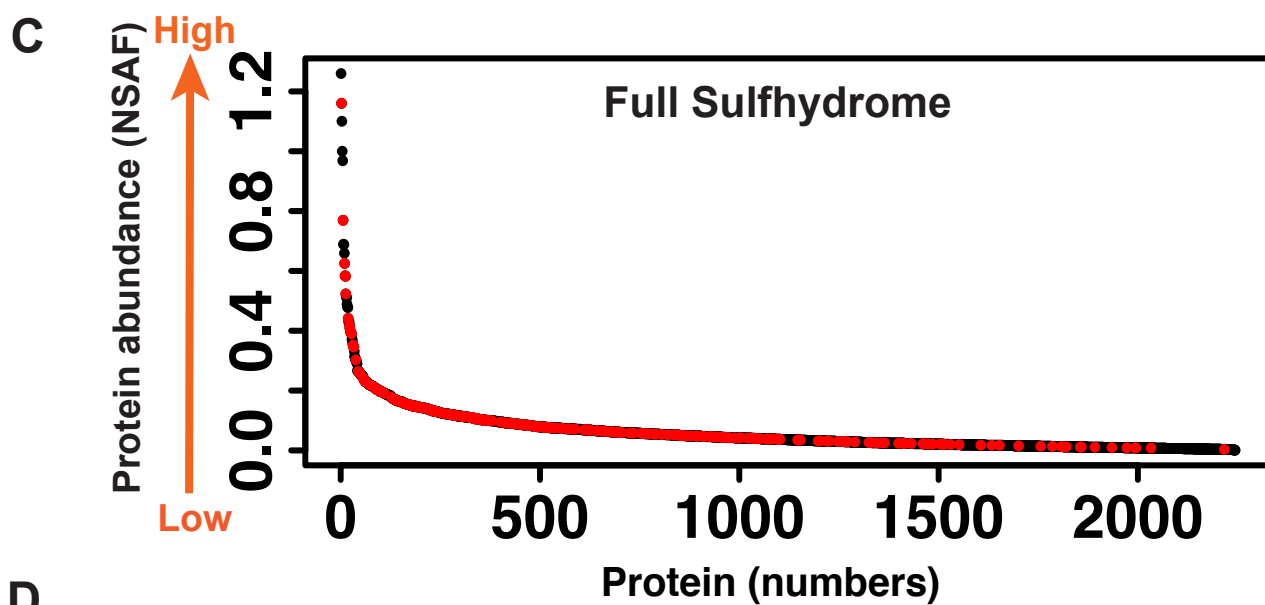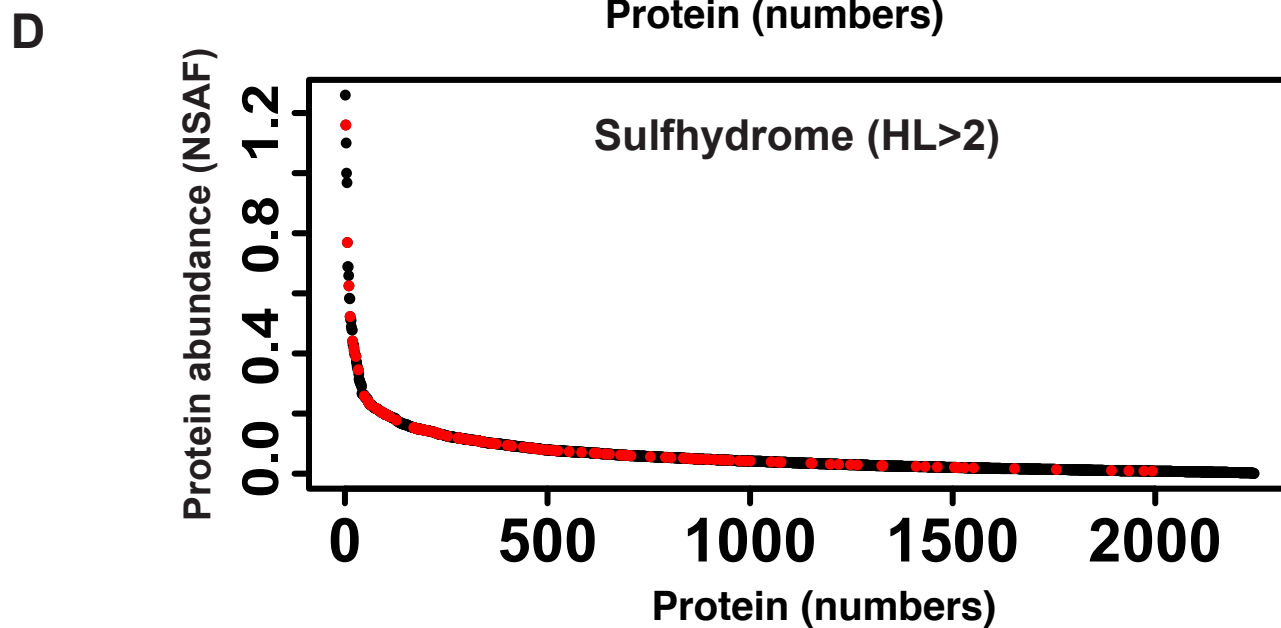

Supplement: supp [file elife_poa_e10067_Figure_3_figure_supplement_7.pdf › elife_poa_e10067_Figure_3_figure_supplement_7.pdf]

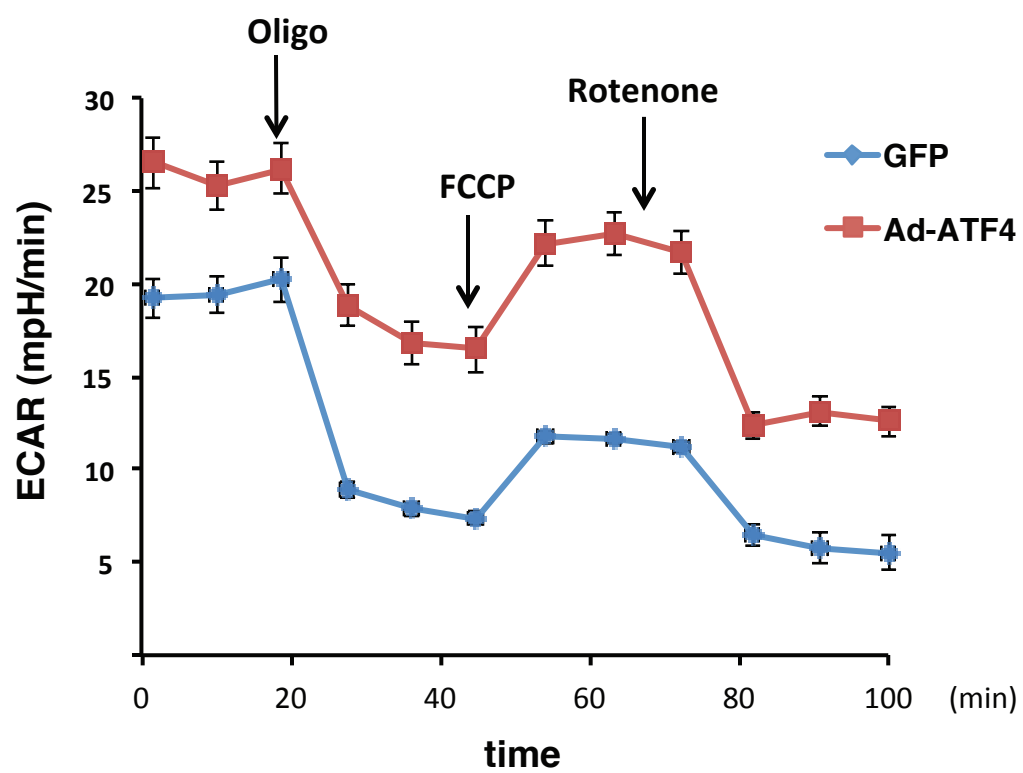

Supplement: supp [file elife_poa_e10067_Figure_4_figure_supplement_1.pdf › elife_poa_e10067_Figure_4_figure_supplement_1.pdf]

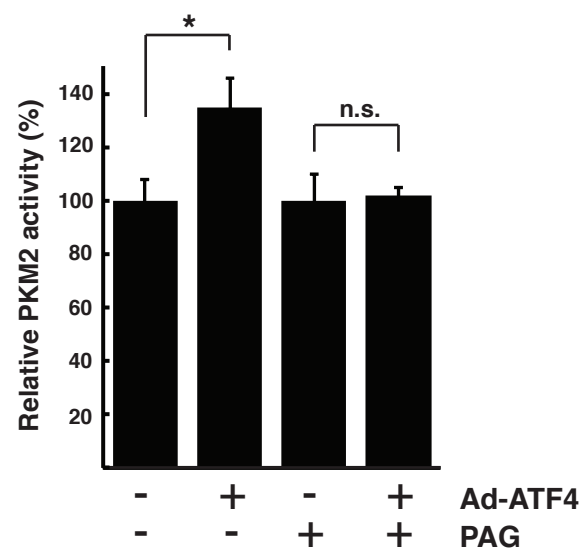

Supplement: supp [file elife_poa_e10067_Figure_4_figure_supplement_2.pdf › elife_poa_e10067_Figure_4_figure_supplement_2.pdf]

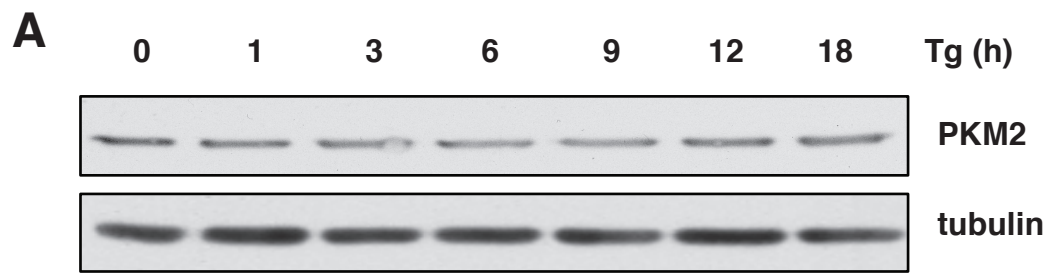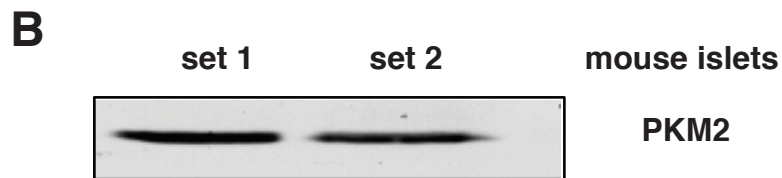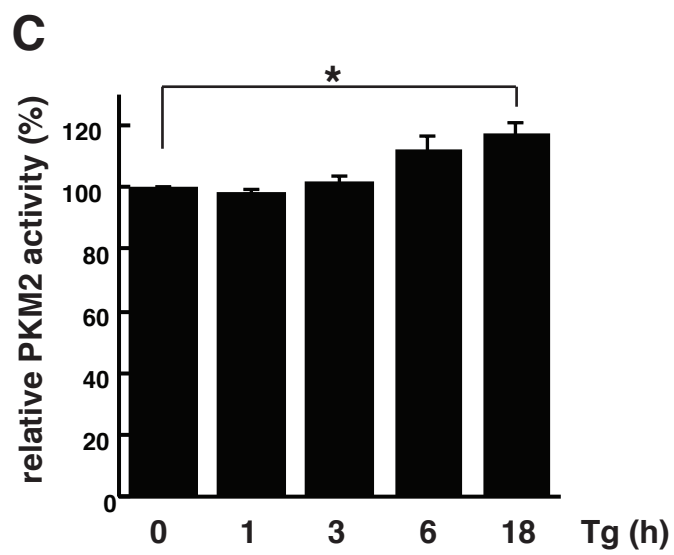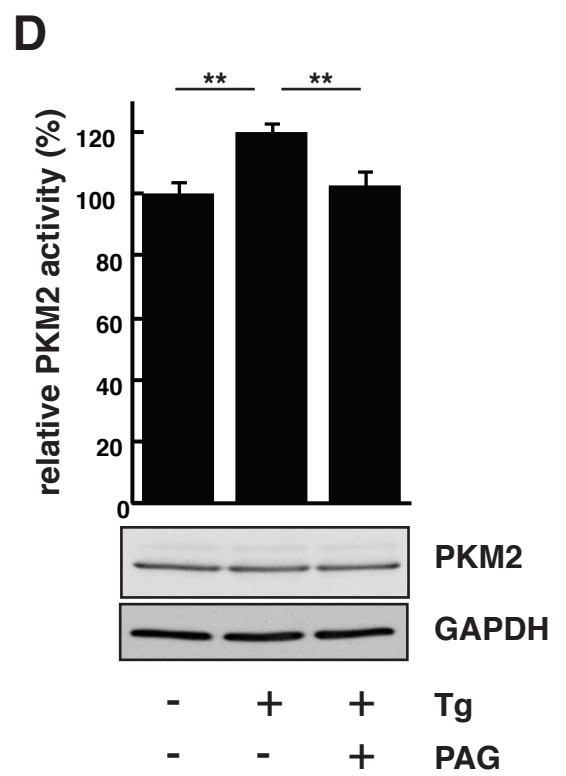

Supplement: supp [file elife_poa_e10067_Figure_4_figure_supplement_3.pdf › elife_poa_e10067_Figure_4_figure_supplement_3.pdf]
